# Supplementary material for: Oscillator Gene OsRVE6a Coordinates Multi-Level Defense Mechanisms against Small Brown Planthopper in Rice
Source: Research Square preprint supplement (doi:10.21203/rs.3.rs-6403081/v1), 2025-04-23
Supplement: Supplementary file 1 [file e15a6a8ae4e43a185b99f1a5.xlsx]

## Sheet: Putative OsRVE6a targets genes
Putative OsRVE6a targets genes
Chromosome	Start	End	Width	Annotation	GeneStart	GeneEnd	GeneLength	GeneStrand	GeneId	DistanceToTSS	GeneDescription
Chr1	66865	67293	429	Promoter (<=1kb)	63244	66302	3059	-	LOC_Os01g01130	-563	sp|Q5ZI43|SPN1_CHICK Snurportin-1 OS=Gallus gallus GN=SNUPN PE=2 SV=1//1.03788e-43
Chr1	651544	651812	269	Promoter (<=1kb)	648128	651881	3754	-	LOC_Os01g02200	69	sp|O22193|PUB4_ARATH U-box domain-containing protein 4 OS=Arabidopsis thaliana GN=PUB4 PE=1 SV=3//2.68827e-07
Chr1	729101	729296	196	Promoter (<=1kb)	728977	730930	1954	+	LOC_Os01g02310	124	sp|Q8RWZ5|SD25_ARATH G-type lectin S-receptor-like serine/threonine-protein kinase SD2-5 OS=Arabidopsis thaliana GN=SD25 PE=1 SV=1//6.1416e-91
Chr1	830202	830415	214	Promoter (<=1kb)	824624	830778	6155	-	LOC_Os01g02530	363	sp|Q7LHG5|YI31B_YEAST Transposon Ty3-I Gag-Pol polyprotein OS=Saccharomyces cerevisiae (strain ATCC 204508 / S288c) GN=TY3B-I PE=3 SV=2//1.57533e-10
Chr1	904951	905147	197	Promoter (<=1kb)	904341	910142	5802	+	LOC_Os01g02670	610	sp|P10978|POLX_TOBAC Retrovirus-related Pol polyprotein from transposon TNT 1-94 OS=Nicotiana tabacum PE=2 SV=1//1.28334e-74
Chr1	1020388	1020606	219	Distal Intergenic	1024184	1030112	5929	+	LOC_Os01g02884	-3578	sp|Q8VHK9|DHX36_MOUSE ATP-dependent RNA helicase DHX36 OS=Mus musculus GN=Dhx36 PE=1 SV=2//5.15547e-158
Chr1	1042839	1043034	196	Distal Intergenic	1046604	1053166	6563	+	LOC_Os01g02890	-3570	sp|Q0JR55|PSS1_ORYSJ CDP-diacylglycerol--serine O-phosphatidyltransferase 1 OS=Oryza sativa subsp. japonica GN=PSS1 PE=2 SV=2//0
Chr1	1057896	1058371	476	Promoter (1-2kb)	1057137	1059856	2720	-	LOC_Os01g02900	1485	sp|Q5NDE4|PMGT2_TAKRU Protein O-linked-mannose beta-1,4-N-acetylglucosaminyltransferase 2 OS=Takifugu rubripes GN=pomgnt2 PE=2 SV=1//1.30592e-08
Chr1	1165910	1166105	196	Promoter (<=1kb)	1165737	1168415	2679	+	LOC_Os01g03050	173	sp|P43394|K502_ACTDE Fruit protein pKIWI502 OS=Actinidia deliciosa GN=pKIWI502 PE=2 SV=1//1.31345e-50
Chr1	1372934	1373249	316	Promoter (<=1kb)	1372963	1374138	1176	+	LOC_Os01g03410	0	sp|Q9FKD9|SINL6_ARATH Putative E3 ubiquitin-protein ligase SINA-like 6 OS=Arabidopsis thaliana GN=At5g37870 PE=3 SV=1//7.56467e-10
Chr1	1446097	1446292	196	Promoter (<=1kb)	1446849	1450473	3625	+	LOC_Os01g03570	-557	sp|Q8VZ79|IDN2_ARATH Protein INVOLVED IN DE NOVO 2 OS=Arabidopsis thaliana GN=IDN2 PE=1 SV=1//2.30914e-128
Chr1	1586156	1586427	272	Promoter (<=1kb)	1585991	1591955	5965	+	LOC_Os01g03780	165	sp|Q7LHG5|YI31B_YEAST Transposon Ty3-I Gag-Pol polyprotein OS=Saccharomyces cerevisiae (strain ATCC 204508 / S288c) GN=TY3B-I PE=3 SV=2//1.01547e-09
Chr1	1841424	1841743	320	Promoter (<=1kb)	1839452	1841734	2283	-	LOC_Os01g04180	0	sp|Q10K98|CCD23_ORYSJ Putative cyclin-D2-3 OS=Oryza sativa subsp. japonica GN=CYCD2-3 PE=3 SV=1//6.66543e-15
Chr1	1969479	1969688	210	Promoter (<=1kb)	1968323	1970538	2216	-	LOC_Os01g04430	850	sp|P0C5E2|Y1839_ARATH Probable serine/threonine-protein kinase At1g18390 OS=Arabidopsis thaliana GN=At1g18390 PE=2 SV=2//1.6602e-14
Chr1	2039065	2039290	226	Promoter (2-3kb)	2041300	2042770	1471	+	LOC_Os01g04560	-2010	sp|P0C5E2|Y1839_ARATH Probable serine/threonine-protein kinase At1g18390 OS=Arabidopsis thaliana GN=At1g18390 PE=2 SV=2//1.04463e-14
Chr1	2077220	2077747	528	Promoter (<=1kb)	2074753	2077903	3151	-	LOC_Os01g04630	156	sp|B9I2J6|AXEP_POPTR L-Ala-D/L-amino acid epimerase OS=Populus trichocarpa GN=POPTR_0012s05040g PE=3 SV=2//1.98929e-171
Chr1	2202670	2202865	196	Promoter (<=1kb)	2202264	2203860	1597	+	LOC_Os01g04800	406	sp|Q9AWS0|Y1410_ORYSJ AP2/ERF and B3 domain-containing protein Os01g0141000 OS=Oryza sativa subsp. japonica GN=Os01g0141000 PE=2 SV=1//5.14838e-158
Chr1	2360113	2360308	196	Promoter (<=1kb)	2357769	2360444	2676	-	LOC_Os01g05010	136	sp|Q8W487|YB95_ARATH Uncharacterized protein At2g39795, mitochondrial OS=Arabidopsis thaliana GN=At2g39795 PE=2 SV=1//8.75318e-52
Chr1	2777087	2777526	440	Promoter (<=1kb)	2776973	2781775	4803	+	LOC_Os01g05810	114	sp|Q9M0G0|GAGT3_ARATH Gamma-glutamyltranspeptidase 3 OS=Arabidopsis thaliana GN=GGT3 PE=2 SV=1//0
Chr1	2783389	2783613	225	Promoter (<=1kb)	2783189	2790454	7266	+	LOC_Os01g05820	200	sp|Q9M0G0|GAGT3_ARATH Gamma-glutamyltranspeptidase 3 OS=Arabidopsis thaliana GN=GGT3 PE=2 SV=1//6.15813e-11
Chr1	2947196	2947391	196	Promoter (<=1kb)	2944998	2947735	2738	-	LOC_Os01g06180	344	sp|P23074|POL_SFV1 Pro-Pol polyprotein OS=Simian foamy virus type 1 GN=pol PE=1 SV=3//1.96697e-17
Chr1	3090658	3090866	209	Promoter (<=1kb)	3085406	3090887	5482	-	LOC_Os01g06550	21	sp|Q9FFK8|NFXL2_ARATH NF-X1-type zinc finger protein NFXL2 OS=Arabidopsis thaliana GN=NFXL2 PE=1 SV=2//0
Chr1	3151585	3151836	252	Promoter (<=1kb)	3147379	3152501	5123	-	LOC_Os01g06680	665	sp|Q9FL28|FLS2_ARATH LRR receptor-like serine/threonine-protein kinase FLS2 OS=Arabidopsis thaliana GN=FLS2 PE=1 SV=1//3.73471e-15
Chr1	3401426	3401621	196	Promoter (<=1kb)	3401288	3407358	6071	+	LOC_Os01g07212	138	sp|Q942N7|CAN1_ORYSJ Probable staphylococcal-like nuclease CAN1 OS=Oryza sativa subsp. japonica GN=Os01g0166100 PE=2 SV=1//1.04519e-66
Chr1	3445820	3446015	196	Promoter (<=1kb)	3445220	3446513	1294	+	LOC_Os01g07300	600	sp|P04399|RIP2_HORVU Protein synthesis inhibitor II OS=Hordeum vulgare GN=RIP30A PE=1 SV=1//1.20798e-80
Chr1	3512042	3512299	258	Promoter (<=1kb)	3511835	3515902	4068	+	LOC_Os01g07410	207	sp|Q8W486|Y1491_ARATH Uncharacterized protein At1g04910 OS=Arabidopsis thaliana GN=At1g04910 PE=2 SV=1//6.53147e-78
Chr1	3573858	3574053	196	Promoter (<=1kb)	3559732	3574280	14549	-	LOC_Os01g07490	227	sp|Q7XZF5|RST1_ARATH Protein RST1 OS=Arabidopsis thaliana GN=RST1 PE=2 SV=2//0
Chr1	3711349	3711626	278	Promoter (<=1kb)	3711212	3713653	2442	+	LOC_Os01g07730	137	sp|Q5VQL3|PPT3_ORYSJ Phosphoenolpyruvate/phosphate translocator 3, chloroplastic OS=Oryza sativa subsp. japonica GN=PPT3 PE=2 SV=1//0
Chr1	3793453	3793648	196	Distal Intergenic	3783691	3786243	2553	-	LOC_Os01g07860	-7210	sp|P11369|LORF2_MOUSE LINE-1 retrotransposable element ORF2 protein OS=Mus musculus GN=Pol PE=1 SV=2//2.006e-28
Chr1	3794326	3794555	230	Distal Intergenic	3783691	3786243	2553	-	LOC_Os01g07860	-8083	sp|P11369|LORF2_MOUSE LINE-1 retrotransposable element ORF2 protein OS=Mus musculus GN=Pol PE=1 SV=2//2.006e-28
Chr1	4004597	4004850	254	Promoter (<=1kb)	4003659	4004946	1288	-	LOC_Os01g08220	96	sp|Q3I409|G3O23_WHEAT Gibberellin 3-beta-dioxygenase 2-3 OS=Triticum aestivum GN=GA3ox2-3 PE=2 SV=1//5.71157e-140
Chr1	4118023	4118284	262	Promoter (<=1kb)	4118041	4122579	4539	+	LOC_Os01g08400	0	sp|Q9LK09|SYP32_ARATH Syntaxin-32 OS=Arabidopsis thaliana GN=SYP32 PE=2 SV=1//1.50479e-116
Chr1	4153261	4153477	217	Promoter (1-2kb)	4152864	4154680	1817	-	LOC_Os01g08440	1203	sp|F8WKW0|UGT1_GARJA Crocetin glucosyltransferase, chloroplastic OS=Gardenia jasminoides GN=UGT75L6 PE=1 SV=1//4.90348e-94
Chr1	4154424	4154687	264	Promoter (<=1kb)	4152864	4154680	1817	-	LOC_Os01g08440	0	sp|F8WKW0|UGT1_GARJA Crocetin glucosyltransferase, chloroplastic OS=Gardenia jasminoides GN=UGT75L6 PE=1 SV=1//4.90348e-94
Chr1	4212924	4213143	220	Promoter (<=1kb)	4208553	4213302	4750	-	LOC_Os01g08510	159	sp|Q9M7J4|MFP1_TOBAC MAR-binding filament-like protein 1-1 OS=Nicotiana tabacum GN=MFP1-1 PE=2 SV=1//6.87715e-74
Chr1	4263764	4263975	212	Promoter (<=1kb)	4264247	4270356	6110	+	LOC_Os01g08570	-272	sp|Q3ED68|Y1295_ARATH Uncharacterized PKHD-type hydroxylase At1g22950 OS=Arabidopsis thaliana GN=At1g22950 PE=2 SV=2//2.6533e-110
Chr1	4275859	4276122	264	Promoter (<=1kb)	4272797	4276333	3537	-	LOC_Os01g08580	211	sp|Q9LUV4|FRL4A_ARATH FRIGIDA-like protein 4a OS=Arabidopsis thaliana GN=FRL4A PE=2 SV=1//9.33655e-27
Chr1	4284013	4284263	251	Promoter (<=1kb)	4284626	4288083	3458	+	LOC_Os01g08610	-363	sp|Q5SVZ6|ZMYM1_HUMAN Zinc finger MYM-type protein 1 OS=Homo sapiens GN=ZMYM1 PE=2 SV=1//6.98002e-37
Chr1	4542412	4542651	240	Promoter (<=1kb)	4542296	4546560	4265	+	LOC_Os01g09030	116	sp|Q8LGJ5|PCO2_ARATH Plant cysteine oxidase 2 OS=Arabidopsis thaliana GN=PCO2 PE=1 SV=1//9.9193e-61
Chr1	4556833	4557101	269	Promoter (2-3kb)	4551112	4554640	3529	-	LOC_Os01g09050	-2193	sp|P10978|POLX_TOBAC Retrovirus-related Pol polyprotein from transposon TNT 1-94 OS=Nicotiana tabacum PE=2 SV=1//0
Chr1	4583914	4584120	207	Promoter (<=1kb)	4581148	4584690	3543	-	LOC_Os01g09120	570	sp|O64511|TLOV1_ARATH Protein TWIN LOV 1 OS=Arabidopsis thaliana GN=TLP1 PE=1 SV=2//1.96442e-16
Chr1	4630996	4631191	196	Promoter (<=1kb)	4621677	4631365	9689	-	LOC_Os01g09200	174	sp|Q6TGC6|CBK1_PNECA Serine/threonine-protein kinase CBK1 OS=Pneumocystis carinii GN=CBK1 PE=2 SV=1//2.43445e-139
Chr1	4800309	4800596	288	Promoter (<=1kb)	4800247	4802179	1933	+	LOC_Os01g09430	62	sp|Q9LIG0|Y3136_ARATH Clavaminate synthase-like protein At3g21360 OS=Arabidopsis thaliana GN=At3g21360 PE=1 SV=1//3.13437e-145
Chr1	5014790	5014985	196	Promoter (<=1kb)	5014609	5015256	648	+	LOC_Os01g09720	181	sp|O82155|DOF17_ARATH Dof zinc finger protein DOF1.7 OS=Arabidopsis thaliana GN=DOF1.7 PE=2 SV=1//5.38381e-26
Chr1	5064787	5065036	250	Promoter (<=1kb)	5060416	5065236	4821	-	LOC_Os01g09800	200	sp|P93002|NPR1_ARATH Regulatory protein NPR1 OS=Arabidopsis thaliana GN=NPR1 PE=1 SV=1//1.05917e-144
Chr1	5275211	5275406	196	Promoter (<=1kb)	5270103	5275678	5576	-	LOC_Os01g10110	272	sp|Q4ADV8|CKX2_ORYSJ Cytokinin dehydrogenase 2 OS=Oryza sativa subsp. japonica GN=CKX2 PE=2 SV=1//0
Chr1	5384161	5384498	338	Promoter (<=1kb)	5384196	5385088	893	+	LOC_Os01g10230	0	sp|P59082|LFS_ALLCE Lachrymatory-factor synthase OS=Allium cepa GN=LFS PE=1 SV=1//4.20867e-09
Chr1	5386873	5387068	196	Promoter (<=1kb)	5386995	5388128	1134	+	LOC_Os01g10240	0	sp|O64515|OCT2_ARATH Organic cation/carnitine transporter 2 OS=Arabidopsis thaliana GN=OCT2 PE=2 SV=1//1.10828e-43
Chr1	5387915	5388147	233	Promoter (<=1kb)	5386995	5388128	1134	+	LOC_Os01g10240	920	sp|O64515|OCT2_ARATH Organic cation/carnitine transporter 2 OS=Arabidopsis thaliana GN=OCT2 PE=2 SV=1//1.10828e-43
Chr1	5543685	5543880	196	Promoter (<=1kb)	5543648	5544544	897	-	LOC_Os01g10480	664	sp|Q5JNJ5|ENL1_ORYSJ Early nodulin-like protein 1 OS=Oryza sativa subsp. japonica GN=ENODL1 PE=1 SV=1//3.62036e-32
Chr1	5549898	5550107	210	Promoter (<=1kb)	5549619	5551003	1385	-	LOC_Os01g10490	896	sp|Q9S728|PDF1_ARATH Protodermal factor 1 OS=Arabidopsis thaliana GN=PDF1 PE=2 SV=1//4.21389e-11
Chr1	5773366	5773780	415	Promoter (<=1kb)	5773300	5774192	893	+	LOC_Os01g10830	66	sp|O23299|ECI2_ARATH Enoyl-CoA delta isomerase 2, peroxisomal OS=Arabidopsis thaliana GN=ECI2 PE=1 SV=1//9.09738e-31
Chr1	5819445	5819652	208	Promoter (<=1kb)	5814778	5819207	4430	-	LOC_Os01g10900	-238	sp|C0LGQ4|MRH1_ARATH Probable LRR receptor-like serine/threonine-protein kinase MRH1 OS=Arabidopsis thaliana GN=MRH1 PE=2 SV=1//2.58568e-179
Chr1	5827920	5828119	200	Promoter (<=1kb)	5823869	5828251	4383	-	LOC_Os01g10920	132	sp|P81898|PNAA_PRUDU Peptide-N4-(N-acetyl-beta-glucosaminyl)asparagine amidase A OS=Prunus dulcis PE=1 SV=2//6.18701e-178
Chr1	5857383	5857578	196	Promoter (<=1kb)	5856467	5857920	1454	+	LOC_Os01g10980	916	sp|Q9FGG3|WTR45_ARATH WAT1-related protein At5g64700 OS=Arabidopsis thaliana GN=At5g64700 PE=2 SV=1//2.37319e-52
Chr1	5972129	5972349	221	Promoter (<=1kb)	5968819	5972489	3671	-	LOC_Os01g11150	140	sp|Q8LEA2|G2OX1_ARATH Gibberellin 2-beta-dioxygenase 1 OS=Arabidopsis thaliana GN=GA2OX1 PE=2 SV=2//8.80816e-75
Chr1	6175485	6175680	196	Promoter (2-3kb)	6171722	6173186	1465	-	LOC_Os01g11460	-2299	sp|Q5EAE9|ATL43_ARATH RING-H2 finger protein ATL43 OS=Arabidopsis thaliana GN=ATL43 PE=2 SV=2//1.59327e-15
Chr1	6765671	6765866	196	Promoter (<=1kb)	6764450	6765888	1439	-	LOC_Os01g12381	22	sp|Q9FJ45|GDL83_ARATH GDSL esterase/lipase At5g45910 OS=Arabidopsis thaliana GN=At5g45910 PE=2 SV=1//1.52589e-44
Chr1	6836968	6837296	329	Promoter (<=1kb)	6837120	6841269	4150	+	LOC_Os01g12470	0	sp|Q944H5|MTM1_ARATH Mitochondrial carrier protein MTM1 OS=Arabidopsis thaliana GN=MTM1 PE=2 SV=1//1.56855e-126
Chr1	6881751	6881946	196	Promoter (<=1kb)	6879905	6881968	2064	-	LOC_Os01g12520	22	sp|Q9CA93|BAC2_ARATH Mitochondrial arginine transporter BAC2 OS=Arabidopsis thaliana GN=BAC2 PE=1 SV=1//4.83221e-127
Chr1	6957524	6957770	247	Promoter (<=1kb)	6957017	6958737	1721	-	LOC_Os01g12640	967	sp|Q9SH58|MAKR2_ARATH Probable membrane-associated kinase regulator 2 OS=Arabidopsis thaliana GN=MAKR2 PE=2 SV=1//2.1232e-17
Chr1	6991567	6991821	255	Promoter (<=1kb)	6990879	6993608	2730	+	LOC_Os01g12680	688	sp|Q9FLV9|SLAH3_ARATH S-type anion channel SLAH3 OS=Arabidopsis thaliana GN=SLAH3 PE=1 SV=1//3.50065e-167
Chr1	7071645	7071869	225	Promoter (<=1kb)	7071481	7073789	2309	+	LOC_Os01g12770	164	sp|P24465|C71A1_PERAE Cytochrome P450 71A1 OS=Persea americana GN=CYP71A1 PE=1 SV=2//1.93016e-85
Chr1	7173603	7173983	381	Promoter (<=1kb)	7173618	7175813	2196	+	LOC_Os01g12910	0	sp|Q5R833|ACO13_PONAB Acyl-coenzyme A thioesterase 13 OS=Pongo abelii GN=ACOT13 PE=2 SV=1//4.05296e-09
Chr1	7183343	7183816	474	Promoter (<=1kb)	7177355	7183963	6609	-	LOC_Os01g12930	147	sp|D1FP53|LIN_MEDTR Putative E3 ubiquitin-protein ligase LIN OS=Medicago truncatula GN=LIN PE=2 SV=1//1.71992e-169
Chr1	7357320	7357515	196	Promoter (<=1kb)	7352175	7357620	5446	-	LOC_Os01g13200	105	sp|Q9C9Z9|ELD1_ARATH Glycosyltransferase-like KOBITO 1 OS=Arabidopsis thaliana GN=ELD1 PE=1 SV=1//0
Chr1	7452907	7453218	312	Promoter (<=1kb)	7450837	7453683	2847	-	LOC_Os01g13370	465	sp|Q84JL3|SINA3_ARATH E3 ubiquitin-protein ligase SINAT3 OS=Arabidopsis thaliana GN=SINAT3 PE=2 SV=1//0
Chr1	7518214	7518565	352	Promoter (1-2kb)	7517210	7518741	1532	+	LOC_Os01g13480	1004	sp|Q9FLE8|Y5986_ARATH Uncharacterized protein At5g39865 OS=Arabidopsis thaliana GN=At5g39865 PE=2 SV=1//9.78099e-23
Chr1	7582407	7582621	215	Promoter (<=1kb)	7578091	7582923	4833	-	LOC_Os01g13550	302	sp|Q9LIR6|BAM1_ARATH Beta-amylase 1, chloroplastic OS=Arabidopsis thaliana GN=BAM1 PE=1 SV=1//8.79986e-134
Chr1	7604108	7604398	291	Promoter (<=1kb)	7602829	7603348	520	-	LOC_Os01g13590	-760	sp|E1U332|ALL12_OLEEU Isoflavone reductase-like protein OS=Olea europaea PE=1 SV=1//9.82445e-33
Chr1	7817810	7818075	266	Promoter (<=1kb)	7817704	7818394	691	+	LOC_Os01g13950	106	sp|Q0JP62|GRXS3_ORYSJ Monothiol glutaredoxin-S3 OS=Oryza sativa subsp. japonica GN=GRXS3 PE=2 SV=1//6.60242e-31
Chr1	7904017	7904476	460	Promoter (<=1kb)	7903813	7904466	654	-	LOC_Os01g14110	0	sp|O80482|BH149_ARATH Transcription factor bHLH149 OS=Arabidopsis thaliana GN=BHLH149 PE=1 SV=1//6.12952e-12
Chr1	8290425	8290703	279	Promoter (<=1kb)	8291337	8296221	4885	+	LOC_Os01g14830	-634	sp|Q9LRN8|RK3B_ARATH 50S ribosomal protein L3-2, chloroplastic OS=Arabidopsis thaliana GN=RPL3B PE=2 SV=1//5.78517e-136
Chr1	8557614	8557828	215	Promoter (<=1kb)	8555286	8557176	1891	-	LOC_Os01g15290	-438	sp|B1LBM4|RL18_THESQ 50S ribosomal protein L18 OS=Thermotoga sp. (strain RQ2) GN=rplR PE=3 SV=1//1.08777e-12
Chr1	8717476	8717671	196	Promoter (<=1kb)	8717853	8720898	3046	+	LOC_Os01g15520	-182	sp|F4KF27|MDA2_ARATH Mediator-associated protein 2 OS=Arabidopsis thaliana GN=At5g64680 PE=1 SV=1//2.19586e-11
Chr1	8732330	8732666	337	Promoter (<=1kb)	8732427	8734486	2060	+	LOC_Os01g15530	0	sp|Q9FMA1|PP433_ARATH Pentatricopeptide repeat-containing protein At5g56310 OS=Arabidopsis thaliana GN=PCMP-E13 PE=2 SV=1//4.92834e-16
Chr1	8822124	8822478	355	Promoter (<=1kb)	8821136	8822609	1474	-	LOC_Os01g15680	131	sp|Q94CD1|HHT1_ARATH Omega-hydroxypalmitate O-feruloyl transferase OS=Arabidopsis thaliana GN=HHT1 PE=1 SV=1//1.21427e-10
Chr1	8891193	8891516	324	Promoter (<=1kb)	8886786	8891444	4659	-	LOC_Os01g15780	0	sp|Q9R9N2|LPSB_RHIME Lipopolysaccharide core biosynthesis mannosyltransferase LpsB OS=Rhizobium meliloti (strain 1021) GN=lpsB PE=3 SV=1//4.25329e-11
Chr1	8924440	8924756	317	Promoter (<=1kb)	8925072	8929646	4575	+	LOC_Os01g15850	-316	sp|Q8RWM3|MED27_ARATH Mediator of RNA polymerase II transcription subunit 27 OS=Arabidopsis thaliana GN=MED27 PE=1 SV=1//1.37399e-137
Chr1	8925035	8925266	232	Promoter (<=1kb)	8925072	8929646	4575	+	LOC_Os01g15850	0	sp|Q8RWM3|MED27_ARATH Mediator of RNA polymerase II transcription subunit 27 OS=Arabidopsis thaliana GN=MED27 PE=1 SV=1//1.37399e-137
Chr1	9013047	9013244	198	Promoter (<=1kb)	9013002	9016711	3710	+	LOC_Os01g16010	45	sp|Q949S9|SPF27_ARATH Pre-mRNA-splicing factor SPF27 homolog OS=Arabidopsis thaliana GN=MOS4 PE=1 SV=1//2.61071e-82
Chr1	9018187	9018434	248	Promoter (<=1kb)	9018144	9019762	1619	+	LOC_Os01g16020	43	sp|Q9ZS34|CHLP_TOBAC Geranylgeranyl diphosphate reductase, chloroplastic OS=Nicotiana tabacum GN=CHLP PE=2 SV=1//6.24855e-147
Chr1	9018971	9019198	228	Promoter (<=1kb)	9018144	9019762	1619	+	LOC_Os01g16020	827	sp|Q9ZS34|CHLP_TOBAC Geranylgeranyl diphosphate reductase, chloroplastic OS=Nicotiana tabacum GN=CHLP PE=2 SV=1//6.24855e-147
Chr1	9066432	9066685	254	Promoter (<=1kb)	9063968	9066787	2820	-	LOC_Os01g16090	102	sp|Q9LES2|UBA2A_ARATH UBP1-associated protein 2A OS=Arabidopsis thaliana GN=UBA2A PE=1 SV=1//4.24072e-93
Chr1	9181521	9181798	278	Promoter (<=1kb)	9179212	9181984	2773	-	LOC_Os01g16220	186	sp|Q9FF75|SUN1_ARATH Protein SAD1/UNC-84 domain protein 1 OS=Arabidopsis thaliana GN=SUN1 PE=1 SV=1//1.79937e-76
Chr1	9192665	9193292	628	Promoter (<=1kb)	9192249	9193439	1191	+	LOC_Os01g16230	416	sp|Q9SGN7|CCR12_ARATH Serine/threonine-protein kinase-like protein At1g28390 OS=Arabidopsis thaliana GN=At1g28390 PE=2 SV=1//3.71782e-43
Chr1	9245022	9245350	329	Promoter (<=1kb)	9245577	9253454	7878	+	LOC_Os01g16310	-227	sp|P32138|YIHQ_ECOLI Alpha-glucosidase YihQ OS=Escherichia coli (strain K12) GN=yihQ PE=1 SV=3//1.79838e-103
Chr1	9429948	9430170	223	Promoter (<=1kb)	9429955	9430747	793	-	LOC_Os01g16610	577	sp|P80728|MAVI_CUCPE Mavicyanin OS=Cucurbita pepo PE=1 SV=1//1.30903e-22
Chr1	9513048	9513338	291	Promoter (<=1kb)	9512985	9515102	2118	+	LOC_Os01g16750	63	sp|Q9LPL3|YUC11_ARATH Probable indole-3-pyruvate monooxygenase YUCCA11 OS=Arabidopsis thaliana GN=YUC11 PE=2 SV=1//9.48449e-109
Chr1	9623713	9624056	344	Promoter (1-2kb)	9613654	9625257	11604	-	LOC_Os01g16850	1201	sp|Q5NBN9|AGO15_ORYSJ Protein argonaute 15 OS=Oryza sativa subsp. japonica GN=AGO15 PE=2 SV=2//5.47011e-45
Chr1	9683990	9684280	291	Promoter (<=1kb)	9682566	9684170	1605	-	LOC_Os01g16930	0	sp|O64668|PSNA_ARATH Presenilin-like protein At1g08700 OS=Arabidopsis thaliana GN=At1g08700 PE=1 SV=1//8.45762e-100
Chr1	9690938	9691133	196	Promoter (<=1kb)	9690235	9692180	1946	+	LOC_Os01g16950	703	sp|Q8LPN7|RNG1L_ARATH E3 ubiquitin-protein ligase RING1-like OS=Arabidopsis thaliana GN=At3g19950 PE=1 SV=1//8.73283e-30
Chr1	9845712	9846156	445	Promoter (<=1kb)	9845800	9848861	3062	+	LOC_Os01g17130	0	sp|Q9LRR5|DRL21_ARATH Putative disease resistance protein At3g14460 OS=Arabidopsis thaliana GN=At3g14460 PE=3 SV=1//5.23663e-52
Chr1	9846341	9846536	196	Promoter (<=1kb)	9845800	9848861	3062	+	LOC_Os01g17130	541	sp|Q9LRR5|DRL21_ARATH Putative disease resistance protein At3g14460 OS=Arabidopsis thaliana GN=At3g14460 PE=3 SV=1//5.23663e-52
Chr1	9846640	9846835	196	Promoter (<=1kb)	9845800	9848861	3062	+	LOC_Os01g17130	840	sp|Q9LRR5|DRL21_ARATH Putative disease resistance protein At3g14460 OS=Arabidopsis thaliana GN=At3g14460 PE=3 SV=1//5.23663e-52
Chr1	10041268	10041735	468	Promoter (<=1kb)	10035844	10041807	5964	-	LOC_Os01g17460	72	sp|Q7LHG5|YI31B_YEAST Transposon Ty3-I Gag-Pol polyprotein OS=Saccharomyces cerevisiae (strain ATCC 204508 / S288c) GN=TY3B-I PE=3 SV=2//1.6445e-07
Chr1	10164822	10165024	203	Promoter (<=1kb)	10164402	10165505	1104	+	LOC_Os01g18150	420	sp|O80397|M2K4_ARATH Mitogen-activated protein kinase kinase 4 OS=Arabidopsis thaliana GN=MKK4 PE=1 SV=1//6.91313e-25
Chr1	10193733	10193928	196	Promoter (<=1kb)	10193643	10196775	3133	+	LOC_Os01g18210	90	sp|P34791|CP20C_ARATH Peptidyl-prolyl cis-trans isomerase CYP20-3, chloroplastic OS=Arabidopsis thaliana GN=CYP20-3 PE=1 SV=1//2.25467e-93
Chr1	10509032	10509300	269	Promoter (<=1kb)	10509032	10513400	4369	+	LOC_Os01g18660	0	sp|Q5JNT6|LCYD2_ORYSJ Putative L-cysteine desulfhydrase 2 OS=Oryza sativa subsp. japonica GN=Os01g0290600 PE=3 SV=1//0
Chr1	10613957	10614219	263	Distal Intergenic	10622795	10627543	4749	+	LOC_Os01g18800	-8576	sp|Q9LGV5|CIPK1_ORYSJ CBL-interacting protein kinase 1 OS=Oryza sativa subsp. japonica GN=CIPK1 PE=2 SV=1//1.92557e-25
Chr1	10830166	10830370	205	Promoter (<=1kb)	10830045	10831911	1867	+	LOC_Os01g19170	121	sp|Q949Z1|PGLR4_ARATH Polygalacturonase At1g48100 OS=Arabidopsis thaliana GN=At1g48100 PE=2 SV=1//5.21515e-150
Chr1	10853610	10853958	349	Promoter (<=1kb)	10853801	10859425	5625	+	LOC_Os01g19190	0	sp|Q7LHG5|YI31B_YEAST Transposon Ty3-I Gag-Pol polyprotein OS=Saccharomyces cerevisiae (strain ATCC 204508 / S288c) GN=TY3B-I PE=3 SV=2//3.76049e-08
Chr1	10986688	10986909	222	Promoter (<=1kb)	10986092	10986991	900	-	LOC_Os01g19420	82	sp|Q84LH3|WEX_ARATH Werner Syndrome-like exonuclease OS=Arabidopsis thaliana GN=WEX PE=1 SV=1//1.55569e-07
Chr1	10991398	10991593	196	Promoter (<=1kb)	10990775	10991617	843	-	LOC_Os01g19430	24	sp|Q84LH3|WEX_ARATH Werner Syndrome-like exonuclease OS=Arabidopsis thaliana GN=WEX PE=1 SV=1//1.79162e-16
Chr1	11784296	11784576	281	Promoter (<=1kb)	11783910	11785001	1092	+	LOC_Os01g21120	386	sp|O22259|ERF71_ARATH Ethylene-responsive transcription factor ERF071 OS=Arabidopsis thaliana GN=ERF071 PE=2 SV=1//2.14044e-24
Chr1	11949922	11950117	196	Promoter (<=1kb)	11948453	11949730	1278	-	LOC_Os01g21400	-192	sp|P10978|POLX_TOBAC Retrovirus-related Pol polyprotein from transposon TNT 1-94 OS=Nicotiana tabacum PE=2 SV=1//6.01174e-61
Chr1	12067088	12067315	228	Promoter (<=1kb)	12067684	12069113	1430	+	LOC_Os01g21560	-369	sp|Q9C942|CSE_ARATH Caffeoylshikimate esterase OS=Arabidopsis thaliana GN=CSE PE=1 SV=1//3.13177e-41
Chr1	12247819	12248126	308	Promoter (<=1kb)	12235262	12248213	12952	-	LOC_Os01g21820	87	sp|Q9SYI0|SECA1_ARATH Protein translocase subunit SECA1, chloroplastic OS=Arabidopsis thaliana GN=SECA1 PE=2 SV=2//0
Chr1	12262720	12262915	196	Promoter (<=1kb)	12258138	12263046	4909	-	LOC_Os01g21850	131	sp|Q6FSK3|SC231_CANGA Protein transport protein SEC23-1 OS=Candida glabrata (strain ATCC 2001 / CBS 138 / JCM 3761 / NBRC 0622 / NRRL Y-65) GN=SEC231 PE=3 SV=1//1.19458e-29
Chr1	12310167	12310362	196	Promoter (<=1kb)	12303170	12309435	6266	-	LOC_Os01g21940	-732	sp|Q8W117|SMU1_ARATH Suppressor of mec-8 and unc-52 protein homolog 1 OS=Arabidopsis thaliana GN=SMU1 PE=1 SV=1//0
Chr1	12389096	12389323	228	Promoter (<=1kb)	12381728	12389166	7439	-	LOC_Os01g22050	0	sp|P04146|COPIA_DROME Copia protein OS=Drosophila melanogaster GN=GIP PE=1 SV=3//3.28329e-43
Chr1	12455579	12456075	497	Promoter (<=1kb)	12457027	12463693	6667	+	LOC_Os01g22170	-952	sp|P0CT40|TF29_SCHPO Transposon Tf2-9 polyprotein OS=Schizosaccharomyces pombe (strain 972 / ATCC 24843) GN=Tf2-9 PE=3 SV=1//1.08274e-145
Chr1	12716019	12716214	196	Distal Intergenic	12704700	12709808	5109	-	LOC_Os01g22600	-6211	sp|Q5RD67|S2544_PONAB Solute carrier family 25 member 44 OS=Pongo abelii GN=SLC25A44 PE=2 SV=2//3.36121e-45
Chr1	12835856	12836069	214	Promoter (<=1kb)	12832002	12835327	3326	-	LOC_Os01g22840	-529	sp|Q99315|YG31B_YEAST Transposon Ty3-G Gag-Pol polyprotein OS=Saccharomyces cerevisiae (strain ATCC 204508 / S288c) GN=TY3B-G PE=1 SV=3//3.42045e-46
Chr1	12847756	12847951	196	Promoter (<=1kb)	12848912	12853410	4499	+	LOC_Os01g22870	-961	sp|Q8LEK2|TVP23_ARATH Golgi apparatus membrane protein-like protein ECHIDNA OS=Arabidopsis thaliana GN=ECH PE=1 SV=1//9.25736e-80
Chr1	12848280	12848477	198	Promoter (<=1kb)	12848912	12853410	4499	+	LOC_Os01g22870	-435	sp|Q8LEK2|TVP23_ARATH Golgi apparatus membrane protein-like protein ECHIDNA OS=Arabidopsis thaliana GN=ECH PE=1 SV=1//9.25736e-80
Chr1	12870371	12870643	273	Promoter (<=1kb)	12870240	12874264	4025	+	LOC_Os01g22900	131	sp|Q10MC0|NIN1_ORYSJ Neutral/alkaline invertase 1, mitochondrial OS=Oryza sativa subsp. japonica GN=NIN1 PE=1 SV=1//0
Chr1	13107428	13107645	218	Promoter (<=1kb)	13102091	13108592	6502	-	LOC_Os01g23330	947	sp|P04323|POL3_DROME Retrovirus-related Pol polyprotein from transposon 17.6 OS=Drosophila melanogaster GN=pol PE=3 SV=1//6.98313e-61
Chr1	13108129	13108714	586	Promoter (<=1kb)	13102091	13108592	6502	-	LOC_Os01g23330	0	sp|P04323|POL3_DROME Retrovirus-related Pol polyprotein from transposon 17.6 OS=Drosophila melanogaster GN=pol PE=3 SV=1//6.98313e-61
Chr1	13272772	13272967	196	Promoter (<=1kb)	13272614	13282201	9588	+	LOC_Os01g23610	158	sp|A8MS68|PLPD1_ARATH Dihydrolipoyl dehydrogenase 1, chloroplastic OS=Arabidopsis thaliana GN=LPD1 PE=2 SV=1//0
Chr1	13492675	13492885	211	Distal Intergenic	13496278	13502236	5959	+	LOC_Os01g23980	-3393	sp|Q9UR07|TF211_SCHPO Transposon Tf2-11 polyprotein OS=Schizosaccharomyces pombe (strain 972 / ATCC 24843) GN=Tf2-11 PE=3 SV=1//2.19569e-110
Chr1	13493312	13494118	807	Promoter (2-3kb)	13496278	13502236	5959	+	LOC_Os01g23980	-2160	sp|Q9UR07|TF211_SCHPO Transposon Tf2-11 polyprotein OS=Schizosaccharomyces pombe (strain 972 / ATCC 24843) GN=Tf2-11 PE=3 SV=1//2.19569e-110
Chr1	14442014	14442318	305	Promoter (2-3kb)	14437845	14439688	1844	-	LOC_Os01g25460	-2326	sp|Q9LJ64|PLRX1_ARATH Pollen-specific leucine-rich repeat extensin-like protein 1 OS=Arabidopsis thaliana GN=PEX1 PE=2 SV=1//1.55254e-122
Chr1	14737796	14737996	201	Promoter (<=1kb)	14730142	14738424	8283	-	LOC_Os01g25990	428	sp|Q9ZVN2|Y1457_ARATH Acyltransferase-like protein At1g54570, chloroplastic OS=Arabidopsis thaliana GN=At1g54570 PE=2 SV=1//2.99366e-13
Chr1	14764149	14764344	196	Promoter (<=1kb)	14754773	14764507	9735	-	LOC_Os01g26039	163	sp|Q9ZVN2|Y1457_ARATH Acyltransferase-like protein At1g54570, chloroplastic OS=Arabidopsis thaliana GN=At1g54570 PE=2 SV=1//0
Chr1	14846551	14846746	196	Promoter (2-3kb)	14841155	14844266	3112	-	LOC_Os01g26190	-2285	sp|P04323|POL3_DROME Retrovirus-related Pol polyprotein from transposon 17.6 OS=Drosophila melanogaster GN=pol PE=3 SV=1//1.41483e-91
Chr1	15027369	15027564	196	Promoter (1-2kb)	15025838	15036256	10419	+	LOC_Os01g26980	1531	sp|Q9LNG5|PPP7L_ARATH Serine/threonine-protein phosphatase 7 long form homolog OS=Arabidopsis thaliana GN=At1g48120 PE=2 SV=1//3.29148e-23
Chr1	15251996	15252191	196	Promoter (<=1kb)	15245454	15251887	6434	-	LOC_Os01g27320	-109	sp|Q8I7P9|POL5_DROME Retrovirus-related Pol polyprotein from transposon opus OS=Drosophila melanogaster GN=pol PE=3 SV=1//1.77025e-94
Chr1	16045746	16045965	220	Promoter (<=1kb)	16046649	16056268	9620	+	LOC_Os01g28680	-684	sp|Q40153|LE14B_LITER LEC14B protein OS=Lithospermum erythrorhizon PE=2 SV=1//1.03749e-17
Chr1	16620211	16620433	223	Promoter (<=1kb)	16616931	16619246	2316	-	LOC_Os01g29650	-965	sp|P10978|POLX_TOBAC Retrovirus-related Pol polyprotein from transposon TNT 1-94 OS=Nicotiana tabacum PE=2 SV=1//4.84833e-11
Chr1	17091027	17091232	206	Promoter (1-2kb)	17091462	17092703	1242	-	LOC_Os01g31250	1471	sp|Q9UR07|TF211_SCHPO Transposon Tf2-11 polyprotein OS=Schizosaccharomyces pombe (strain 972 / ATCC 24843) GN=Tf2-11 PE=3 SV=1//5.52737e-53
Chr1	17301079	17301425	347	Promoter (<=1kb)	17301967	17303723	1757	+	LOC_Os01g31610	-542	sp|Q9M876|SYYM_ARATH Tyrosine--tRNA ligase, chloroplastic/mitochondrial OS=Arabidopsis thaliana GN=EMB2768 PE=2 SV=1//0
Chr1	17491068	17491263	196	Promoter (<=1kb)	17490452	17491820	1369	-	LOC_Os01g31940	557	sp|Q9SY29|PUP4_ARATH Probable purine permease 4 OS=Arabidopsis thaliana GN=PUP4 PE=2 SV=1//8.91258e-11
Chr1	17697143	17697394	252	Promoter (<=1kb)	17697080	17706376	9297	+	LOC_Os01g32280	63	sp|Q5RF73|TMM19_PONAB Transmembrane protein 19 OS=Pongo abelii GN=TMEM19 PE=2 SV=1//1.98077e-33
Chr1	17833637	17833946	310	Promoter (2-3kb)	17827164	17831627	4464	-	LOC_Os01g32510	-2010	sp|P03364|POL_SMRVH Pol polyprotein OS=Squirrel monkey retrovirus GN=pol PE=3 SV=2//1.35926e-06
Chr1	17891623	17891914	292	Promoter (1-2kb)	17887504	17892946	5443	-	LOC_Os01g32630	1032	sp|P10978|POLX_TOBAC Retrovirus-related Pol polyprotein from transposon TNT 1-94 OS=Nicotiana tabacum PE=2 SV=1//2.88135e-49
Chr1	18111151	18111360	210	Promoter (<=1kb)	18101551	18111348	9798	-	LOC_Os01g32980	0	sp|Q8RWA5|NDT2_ARATH Nicotinamide adenine dinucleotide transporter 2, mitochondrial OS=Arabidopsis thaliana GN=NDT2 PE=1 SV=1//9.74554e-119
Chr1	18260259	18260620	362	Promoter (<=1kb)	18259565	18267198	7634	+	LOC_Os01g33160	694	sp|Q9LUV2|POP3_ARATH Probable protein Pop3 OS=Arabidopsis thaliana GN=At3g17210 PE=1 SV=1//1.65165e-39
Chr1	18755410	18755831	422	Promoter (<=1kb)	18755268	18756900	1633	+	LOC_Os01g34060	142	sp|Q8S9H7|DIV_ANTMA Transcription factor DIVARICATA OS=Antirrhinum majus GN=DIVARICATA PE=2 SV=1//3.11638e-30
Chr1	18945176	18945535	360	Promoter (<=1kb)	18940388	18945666	5279	-	LOC_Os01g34350	131	sp|Q8LHH9|SHL2_ORYSJ Probable RNA-dependent RNA polymerase SHL2 OS=Oryza sativa subsp. japonica GN=SHL2 PE=2 SV=1//0
Chr1	19020293	19020672	380	Promoter (<=1kb)	19016352	19020551	4200	-	LOC_Os01g34490	0	sp|P10978|POLX_TOBAC Retrovirus-related Pol polyprotein from transposon TNT 1-94 OS=Nicotiana tabacum PE=2 SV=1//3.4961e-17
Chr1	19059313	19059523	211	Promoter (<=1kb)	19059233	19061180	1948	+	LOC_Os01g34560	80	sp|Q9XF43|KCS6_ARATH 3-ketoacyl-CoA synthase 6 OS=Arabidopsis thaliana GN=CUT1 PE=1 SV=1//5.14831e-166
Chr1	19084840	19085035	196	Promoter (<=1kb)	19085832	19088290	2459	+	LOC_Os01g34614	-797	sp|Q9FLM8|NRPBC_ARATH DNA-directed RNA polymerases II, IV and V subunit 12 OS=Arabidopsis thaliana GN=NRPB12 PE=1 SV=1//1.84397e-21
Chr1	19128782	19129143	362	Promoter (<=1kb)	19123411	19129192	5782	-	LOC_Os01g34680	49	sp|Q8H0T9|KTNB1_ARATH Katanin p80 WD40 repeat-containing subunit B1 homolog OS=Arabidopsis thaliana GN=At5g23430 PE=2 SV=3//1.33667e-06
Chr1	19217282	19217477	196	Promoter (<=1kb)	19217798	19220689	2892	+	LOC_Os01g34810	-321	sp|Q8K259|GIN1_MOUSE Gypsy retrotransposon integrase-like protein 1 OS=Mus musculus GN=Gin1 PE=2 SV=2//1.78489e-15
Chr1	19364788	19365011	224	Promoter (<=1kb)	19364101	19364845	745	+	LOC_Os01g34990	687	sp|Q69TU6|IAA22_ORYSJ Auxin-responsive protein IAA22 OS=Oryza sativa subsp. japonica GN=IAA22 PE=2 SV=1//1.71626e-24
Chr1	19377269	19377600	332	Promoter (<=1kb)	19378169	19387198	9030	+	LOC_Os01g35030	-569	sp|Q9FWX7|AB11B_ARATH ABC transporter B family member 11 OS=Arabidopsis thaliana GN=ABCB11 PE=2 SV=1//3.86951e-102
Chr1	19390033	19390252	220	Promoter (<=1kb)	19389831	19392858	3028	+	LOC_Os01g35040	202	sp|Q92890|UFD1_HUMAN Ubiquitin fusion degradation protein 1 homolog OS=Homo sapiens GN=UFD1L PE=1 SV=3//2.71201e-24
Chr1	19438393	19438588	196	Promoter (<=1kb)	19437901	19438692	792	-	LOC_Os01g35120	104	sp|Q86Y13|DZIP3_HUMAN E3 ubiquitin-protein ligase DZIP3 OS=Homo sapiens GN=DZIP3 PE=1 SV=2//6.89163e-08
Chr1	19956267	19956677	411	Promoter (<=1kb)	19956772	19959465	2694	+	LOC_Os01g36064	-95	sp|Q5SVZ6|ZMYM1_HUMAN Zinc finger MYM-type protein 1 OS=Homo sapiens GN=ZMYM1 PE=2 SV=1//7.26745e-47
Chr1	20387953	20388148	196	Promoter (<=1kb)	20386195	20388517	2323	-	LOC_Os01g36720	369	sp|A2ZU80|NRT24_ORYSJ Probable high-affinity nitrate transporter 2.4 OS=Oryza sativa subsp. japonica GN=NRT2.4 PE=2 SV=2//0
Chr1	20468443	20468819	377	Promoter (<=1kb)	20464606	20469249	4644	-	LOC_Os01g36790	430	sp|Q9CAL3|CRK2_ARATH Cysteine-rich receptor-like protein kinase 2 OS=Arabidopsis thaliana GN=CRK2 PE=2 SV=1//4.20748e-150
Chr1	20522635	20522866	232	Promoter (<=1kb)	20522447	20528243	5797	+	LOC_Os01g36860	188	sp|Q5JKF2|RH40_ORYSJ DEAD-box ATP-dependent RNA helicase 40 OS=Oryza sativa subsp. japonica GN=Os01g0549400 PE=2 SV=2//3.26033e-69
Chr1	20595470	20595679	210	Promoter (<=1kb)	20595192	20598852	3661	+	LOC_Os01g36940	278	sp|Q93YV9|SKIP8_ARATH F-box protein SKIP8 OS=Arabidopsis thaliana GN=SKIP8 PE=1 SV=1//1.03021e-92
Chr1	20880087	20880569	483	Promoter (<=1kb)	20878581	20880562	1982	-	LOC_Os01g37400	0	sp|P10978|POLX_TOBAC Retrovirus-related Pol polyprotein from transposon TNT 1-94 OS=Nicotiana tabacum PE=2 SV=1//1.44551e-35
Chr1	20955901	20956121	221	Promoter (<=1kb)	20953958	20955515	1558	-	LOC_Os01g37510	-386	sp|B6RGY0|DEF1A_ORYSJ Peptide deformylase 1A, chloroplastic OS=Oryza sativa subsp. japonica GN=PDF1A PE=2 SV=1//2.39894e-138
Chr1	21057681	21057958	278	Promoter (<=1kb)	21056631	21058040	1410	-	LOC_Os01g37630	82	sp|O80477|MES3_ARATH Methylesterase 3 OS=Arabidopsis thaliana GN=MES3 PE=2 SV=1//6.97922e-58
Chr1	21063438	21063635	198	Promoter (<=1kb)	21062329	21063718	1390	-	LOC_Os01g37650	83	sp|Q6RYA0|SABP2_TOBAC Salicylic acid-binding protein 2 OS=Nicotiana tabacum GN=SABP2 PE=1 SV=1//3.53863e-52
Chr1	21115162	21115357	196	Promoter (<=1kb)	21114737	21115791	1055	-	LOC_Os01g37750	434	sp|Q06398|GSTU6_ORYSJ Probable glutathione S-transferase GSTU6 OS=Oryza sativa subsp. japonica GN=GSTU6 PE=2 SV=2//1.86104e-45
Chr1	21158399	21158632	234	Promoter (<=1kb)	21159072	21167577	8506	+	LOC_Os01g37825	-440	sp|P45181|PQQL_HAEIN Probable zinc protease PqqL OS=Haemophilus influenzae (strain ATCC 51907 / DSM 11121 / KW20 / Rd) GN=pqqL PE=3 SV=1//1.80796e-48
Chr1	21195390	21195683	294	Promoter (<=1kb)	21195398	21202961	7564	+	LOC_Os01g37870	0	sp|Q0WVV0|PPR31_ARATH Pentatricopeptide repeat-containing protein At1g10910, chloroplastic OS=Arabidopsis thaliana GN=At1g10910 PE=2 SV=1//0
Chr1	21369995	21370190	196	Promoter (<=1kb)	21365974	21369381	3408	-	LOC_Os01g38150	-614	sp|P04323|POL3_DROME Retrovirus-related Pol polyprotein from transposon 17.6 OS=Drosophila melanogaster GN=pol PE=3 SV=1//1.00246e-40
Chr1	21750242	21750437	196	Promoter (<=1kb)	21750063	21754448	4386	+	LOC_Os01g38740	179	sp|P10978|POLX_TOBAC Retrovirus-related Pol polyprotein from transposon TNT 1-94 OS=Nicotiana tabacum PE=2 SV=1//4.45703e-91
Chr1	21755026	21755443	418	Promoter (<=1kb)	21755190	21755910	721	+	LOC_Os01g38750	0	sp|P08299|PR1A_TOBAC Pathogenesis-related protein 1A OS=Nicotiana tabacum PE=1 SV=1//4.02915e-09
Chr1	21849507	21849806	300	Promoter (1-2kb)	21847494	21848084	591	-	LOC_Os01g38910	-1423	sp|Q8GYA4|CRK10_ARATH Cysteine-rich receptor-like protein kinase 10 OS=Arabidopsis thaliana GN=CRK10 PE=1 SV=3//5.59522e-11
Chr1	22081386	22081581	196	Promoter (<=1kb)	22082256	22088383	6128	+	LOC_Os01g39260	-675	sp|Q8LQJ8|FTSH5_ORYSJ ATP-dependent zinc metalloprotease FTSH 5, mitochondrial OS=Oryza sativa subsp. japonica GN=FTSH5 PE=3 SV=1//0
Chr1	22092032	22092269	238	Promoter (<=1kb)	22091548	22091889	342	-	LOC_Os01g39280	-143	sp|Q69LA6|PDX11_ORYSJ Probable pyridoxal 5&apos;-phosphate synthase subunit PDX1.1 OS=Oryza sativa subsp. japonica GN=PDX11 PE=2 SV=1//3.68623e-55
Chr1	22147851	22148069	219	Promoter (1-2kb)	22146536	22148748	2213	+	LOC_Os01g39350	1315	sp|Q2QSL4|CDKF2_ORYSJ Putative cyclin-dependent kinase F-2 OS=Oryza sativa subsp. japonica GN=CDKF-2 PE=3 SV=1//2.3835e-42
Chr1	22300226	22300556	331	Promoter (<=1kb)	22301236	22307857	6622	+	LOC_Os01g39560	-680	sp|P13526|ARLC_MAIZE Anthocyanin regulatory Lc protein OS=Zea mays GN=LC PE=2 SV=1//2.36349e-67
Chr1	22322805	22323140	336	Promoter (<=1kb)	22322069	22327371	5303	+	LOC_Os01g39580	736	sp|P13027|ARRS_MAIZE Anthocyanin regulatory R-S protein OS=Zea mays GN=R-S PE=2 SV=1//1.60022e-64
Chr1	22341198	22341476	279	Promoter (<=1kb)	22337346	22341478	4133	-	LOC_Os01g39600	2	sp|Q9LYN8|EMS1_ARATH Leucine-rich repeat receptor protein kinase EMS1 OS=Arabidopsis thaliana GN=EMS1 PE=1 SV=1//3.55259e-09
Chr1	22605097	22605396	300	Promoter (<=1kb)	22604519	22606808	2290	+	LOC_Os01g40070	578	sp|Q17QR8|HARB1_BOVIN Putative nuclease HARBI1 OS=Bos taurus GN=HARBI1 PE=2 SV=1//3.19415e-17
Chr1	22687138	22687368	231	Promoter (<=1kb)	22683543	22688044	4502	-	LOC_Os01g40200	676	sp|F4HWY6|MYO11_ARATH Myosin-11 OS=Arabidopsis thaliana GN=XI-E PE=3 SV=1//1.0465e-130
Chr1	22862066	22862279	214	Promoter (2-3kb)	22855458	22859753	4296	-	LOC_Os01g40470	-2313	sp|Q8RU33|VA0D_ORYSJ Probable V-type proton ATPase subunit d OS=Oryza sativa subsp. japonica GN=Os01g0587000 PE=2 SV=1//0
Chr1	22895197	22895573	377	Promoter (<=1kb)	22879904	22895941	16038	-	LOC_Os01g40499	368	sp|O64477|Y2913_ARATH G-type lectin S-receptor-like serine/threonine-protein kinase At2g19130 OS=Arabidopsis thaliana GN=At2g19130 PE=2 SV=1//0
Chr1	22907532	22907727	196	Promoter (1-2kb)	22906443	22907811	1369	+	LOC_Os01g40560	1089	sp|Q9FM19|HIR1_ARATH Hypersensitive-induced response protein 1 OS=Arabidopsis thaliana GN=HIR1 PE=1 SV=1//7.10096e-73
Chr1	22911261	22911532	272	Promoter (<=1kb)	22908180	22910687	2508	-	LOC_Os01g40570	-574	sp|Q7F4F8|VDAC3_ORYSJ Mitochondrial outer membrane protein porin 3 OS=Oryza sativa subsp. japonica GN=VDAC3 PE=2 SV=1//0
Chr1	23136359	23136711	353	Promoter (<=1kb)	23137484	23142649	5166	+	LOC_Os01g40910	-773	sp|Q9LNG5|PPP7L_ARATH Serine/threonine-protein phosphatase 7 long form homolog OS=Arabidopsis thaliana GN=At1g48120 PE=2 SV=1//1.42171e-09
Chr1	23187667	23187862	196	Promoter (<=1kb)	23179790	23186976	7187	-	LOC_Os01g40980	-691	sp|P0C928|RTEL1_DANRE Regulator of telomere elongation helicase 1 OS=Danio rerio GN=rtel1 PE=3 SV=1//1.48042e-167
Chr1	23263380	23263575	196	Promoter (<=1kb)	23257782	23263959	6178	-	LOC_Os01g41070	384	sp|Q7LHG5|YI31B_YEAST Transposon Ty3-I Gag-Pol polyprotein OS=Saccharomyces cerevisiae (strain ATCC 204508 / S288c) GN=TY3B-I PE=3 SV=2//9.66869e-10
Chr1	23394358	23394553	196	Promoter (<=1kb)	23392955	23394611	1657	-	LOC_Os01g41340	58	sp|Q94B46|FBL74_ARATH F-box/LRR-repeat protein At4g14096 OS=Arabidopsis thaliana GN=At4g14096 PE=2 SV=1//3.49158e-12
Chr1	23482087	23482348	262	Promoter (<=1kb)	23482415	23485058	2644	+	LOC_Os01g41480	-67	sp|Q7LHG5|YI31B_YEAST Transposon Ty3-I Gag-Pol polyprotein OS=Saccharomyces cerevisiae (strain ATCC 204508 / S288c) GN=TY3B-I PE=3 SV=2//1.51529e-31
Chr1	23827952	23828147	196	Promoter (<=1kb)	23823086	23828384	5299	-	LOC_Os01g42020	237	sp|P08548|LIN1_NYCCO LINE-1 reverse transcriptase homolog OS=Nycticebus coucang PE=3 SV=1//1.64377e-13
Chr1	23828347	23828542	196	Promoter (<=1kb)	23823086	23828384	5299	-	LOC_Os01g42020	0	sp|P08548|LIN1_NYCCO LINE-1 reverse transcriptase homolog OS=Nycticebus coucang PE=3 SV=1//1.64377e-13
Chr1	23842931	23843128	198	Promoter (<=1kb)	23843274	23846881	3608	+	LOC_Os01g42040	-146	sp|Q941B6|UBC37_ARATH Probable ubiquitin-conjugating enzyme E2 37 OS=Arabidopsis thaliana GN=UBC37 PE=2 SV=2//1.12137e-77
Chr1	24011857	24012195	339	Distal Intergenic	24015673	24019941	4269	+	LOC_Os01g42320	-3478	sp|Q9LS40|ASPG1_ARATH Protein ASPARTIC PROTEASE IN GUARD CELL 1 OS=Arabidopsis thaliana GN=ASPG1 PE=1 SV=1//1.50975e-34
Chr1	24105347	24105542	196	Promoter (<=1kb)	24103349	24105829	2481	-	LOC_Os01g42400	287	sp|Q9FX43|M2K9_ARATH Mitogen-activated protein kinase kinase 9 OS=Arabidopsis thaliana GN=MKK9 PE=1 SV=1//1.75699e-39
Chr1	24192372	24192572	201	Promoter (<=1kb)	24191709	24193093	1385	-	LOC_Os01g42540	521	sp|Q9C7C4|EML1_ARATH Protein EMSY-LIKE 1 OS=Arabidopsis thaliana GN=EML1 PE=1 SV=1//3.49411e-08
Chr1	24255262	24255594	333	Promoter (<=1kb)	24255299	24259958	4660	+	LOC_Os01g42650	0	sp|Q9SSB8|CX5B2_ARATH Cytochrome c oxidase subunit 5b-2, mitochondrial OS=Arabidopsis thaliana GN=COX5B-2 PE=2 SV=1//4.87384e-41
Chr1	24325693	24325910	218	Promoter (<=1kb)	24325337	24325666	330	-	LOC_Os01g42740	-27	sp|Q84KJ7|AMT21_ORYSJ Ammonium transporter 2 member 1 OS=Oryza sativa subsp. japonica GN=AMT2-1 PE=2 SV=1//9.10638e-55
Chr1	24344010	24344246	237	Promoter (<=1kb)	24343518	24345173	1656	-	LOC_Os01g42780	927	sp|A2XQE8|SAG39_ORYSI Senescence-specific cysteine protease SAG39 OS=Oryza sativa subsp. indica GN=OsI_14861 PE=3 SV=1//1.89799e-66
Chr1	24371509	24371704	196	Promoter (<=1kb)	24368724	24372156	3433	-	LOC_Os01g42820	452	sp|Q9LKA4|UBA2C_ARATH UBP1-associated protein 2C OS=Arabidopsis thaliana GN=UBA2C PE=2 SV=1//2.14876e-07
Chr1	24386411	24386606	196	Promoter (<=1kb)	24380636	24386687	6052	-	LOC_Os01g42850	81	sp|Q94CD5|ATG7_ARATH Ubiquitin-like modifier-activating enzyme atg7 OS=Arabidopsis thaliana GN=ATG7 PE=1 SV=1//1.8592e-118
Chr1	24396585	24396828	244	Promoter (<=1kb)	24395057	24396820	1764	-	LOC_Os01g42870	0	sp|Q94CD1|HHT1_ARATH Omega-hydroxypalmitate O-feruloyl transferase OS=Arabidopsis thaliana GN=HHT1 PE=1 SV=1//2.59686e-46
Chr1	24629597	24629841	245	Promoter (<=1kb)	24629270	24632332	3063	+	LOC_Os01g43160	327	sp|A7PZL3|PGLR_VITVI Probable polygalacturonase OS=Vitis vinifera GN=GSVIVT00026920001 PE=1 SV=1//7.76862e-132
Chr1	24729732	24730280	549	Distal Intergenic	24739092	24741088	1997	+	LOC_Os01g43280	-8812	sp|Q9AR73|HQGT_RAUSE Hydroquinone glucosyltransferase OS=Rauvolfia serpentina GN=AS PE=1 SV=1//3.05023e-111
Chr1	25247994	25248195	202	Distal Intergenic	25257001	25263981	6981	+	LOC_Os01g44069	-8806	sp|Q9SHJ5|GPAT1_ARATH Glycerol-3-phosphate acyltransferase 1 OS=Arabidopsis thaliana GN=GPAT1 PE=1 SV=1//1.46306e-138
Chr1	25737241	25737436	196	Promoter (2-3kb)	25727086	25734913	7828	-	LOC_Os01g45330	-2328	sp|P0CT40|TF29_SCHPO Transposon Tf2-9 polyprotein OS=Schizosaccharomyces pombe (strain 972 / ATCC 24843) GN=Tf2-9 PE=3 SV=1//8.58199e-20
Chr1	25762547	25762802	256	Promoter (<=1kb)	25762489	25766525	4037	+	LOC_Os01g45390	58	sp|Q1LUI2|HDDC2_DANRE HD domain-containing protein 2 OS=Danio rerio GN=hddc2 PE=2 SV=1//1.06754e-47
Chr1	25994715	25994910	196	Promoter (<=1kb)	25994669	25996948	2280	+	LOC_Os01g45760	46	sp|Q9LFM5|YUC4_ARATH Probable indole-3-pyruvate monooxygenase YUCCA4 OS=Arabidopsis thaliana GN=YUC4 PE=1 SV=1//5.12044e-13
Chr1	26135808	26136003	196	Distal Intergenic	26143733	26149437	5705	+	LOC_Os01g46000	-7730	sp|P04146|COPIA_DROME Copia protein OS=Drosophila melanogaster GN=GIP PE=1 SV=3//3.16027e-100
Chr1	26163092	26163287	196	Promoter (<=1kb)	26163786	26166472	2687	+	LOC_Os01g46020	-499	sp|B9DG24|TAF7_ARATH Transcription initiation factor TFIID subunit 7 OS=Arabidopsis thaliana GN=TAF7 PE=1 SV=1//6.02883e-41
Chr1	26293134	26293329	196	Promoter (<=1kb)	26293205	26295001	1797	+	LOC_Os01g46230	0	sp|Q9LTF4|PP429_ARATH Putative pentatricopeptide repeat-containing protein At5g52630 OS=Arabidopsis thaliana GN=PCMP-H52 PE=3 SV=1//0
Chr1	26611925	26612153	229	Promoter (<=1kb)	26611799	26618704	6906	+	LOC_Os01g46720	126	sp|Q9LV04|PAP14_ARATH Probable plastid-lipid-associated protein 14, chloroplastic OS=Arabidopsis thaliana GN=PAP14 PE=1 SV=1//0
Chr1	26663443	26663675	233	Distal Intergenic	26667055	26673210	6156	+	LOC_Os01g46770	-3380	sp|Q7LHG5|YI31B_YEAST Transposon Ty3-I Gag-Pol polyprotein OS=Saccharomyces cerevisiae (strain ATCC 204508 / S288c) GN=TY3B-I PE=3 SV=2//1.63378e-10
Chr1	26895435	26895630	196	Promoter (<=1kb)	26888393	26895732	7340	-	LOC_Os01g47080	102	sp|Q9FLW9|PKP2_ARATH Plastidial pyruvate kinase 2 OS=Arabidopsis thaliana GN=PKP2 PE=1 SV=1//0
Chr1	27039944	27040467	524	Promoter (1-2kb)	27041791	27042669	879	+	LOC_Os01g47330	-1324	sp|O22386|RK12_ORYSJ 50S ribosomal protein L12, chloroplastic OS=Oryza sativa subsp. japonica GN=RPL12-2 PE=2 SV=2//9.16587e-56
Chr1	27042036	27042342	307	Promoter (<=1kb)	27041791	27042669	879	+	LOC_Os01g47330	245	sp|O22386|RK12_ORYSJ 50S ribosomal protein L12, chloroplastic OS=Oryza sativa subsp. japonica GN=RPL12-2 PE=2 SV=2//9.16587e-56
Chr1	27115634	27115866	233	Promoter (<=1kb)	27115662	27121178	5517	+	LOC_Os01g47450	0	sp|F4KHG6|CTPA1_ARATH Carboxyl-terminal-processing peptidase 1, chloroplastic OS=Arabidopsis thaliana GN=CTPA1 PE=1 SV=1//0
Chr1	27185866	27186061	196	Promoter (<=1kb)	27185633	27191256	5624	+	LOC_Os01g47550	233	sp|P36945|RBSK_BACSU Ribokinase OS=Bacillus subtilis (strain 168) GN=rbsK PE=3 SV=2//1.06124e-36
Chr1	27208632	27208878	247	Distal Intergenic	27196417	27200990	4574	-	LOC_Os01g47560	-7642	sp|Q93WV4|WRK71_ARATH Probable WRKY transcription factor 71 OS=Arabidopsis thaliana GN=WRKY71 PE=2 SV=1//9.21525e-44
Chr1	27240805	27241173	369	Promoter (1-2kb)	27240118	27242510	2393	-	LOC_Os01g47610	1337	sp|Q680C0|GDL62_ARATH GDSL esterase/lipase At4g10955 OS=Arabidopsis thaliana GN=At4g10955 PE=2 SV=1//2.43975e-25
Chr1	27354155	27354417	263	Promoter (2-3kb)	27345207	27352121	6915	-	LOC_Os01g47790	-2034	sp|Q9LNG5|PPP7L_ARATH Serine/threonine-protein phosphatase 7 long form homolog OS=Arabidopsis thaliana GN=At1g48120 PE=2 SV=1//5.80913e-35
Chr1	27506846	27507041	196	Promoter (<=1kb)	27501563	27507096	5534	-	LOC_Os01g48060	55	sp|Q0JKI9|ARFB_ORYSJ Auxin response factor 2 OS=Oryza sativa subsp. japonica GN=ARF2 PE=2 SV=1//0
Chr1	27531049	27531244	196	Promoter (<=1kb)	27529435	27530712	1278	-	LOC_Os01g48070	-337	sp|P10978|POLX_TOBAC Retrovirus-related Pol polyprotein from transposon TNT 1-94 OS=Nicotiana tabacum PE=2 SV=1//3.41826e-64
Chr1	27666462	27666657	196	Promoter (<=1kb)	27660013	27666772	6760	-	LOC_Os01g48270	115	sp|Q9D3R6|KATL2_MOUSE Katanin p60 ATPase-containing subunit A-like 2 OS=Mus musculus GN=Katnal2 PE=2 SV=2//5.49788e-123
Chr1	27676757	27677092	336	Promoter (<=1kb)	27676501	27677028	528	+	LOC_Os01g48290	256	sp|P68350|DOF15_ARATH Dof zinc finger protein DOF1.5 OS=Arabidopsis thaliana GN=DOF1.5 PE=1 SV=1//1.63545e-16
Chr1	27681297	27681562	266	Promoter (<=1kb)	27677194	27681560	4367	-	LOC_Os01g48300	0	sp|P08443|ATPZ_SYNP6 ATP synthase protein I OS=Synechococcus sp. (strain ATCC 27144 / PCC 6301 / SAUG 1402/1) GN=atpI PE=3 SV=1//9.01392e-09
Chr1	27691527	27691934	408	Promoter (<=1kb)	27690411	27692209	1799	-	LOC_Os01g48320	275	sp|Q9LJG8|ASIL2_ARATH Trihelix transcription factor ASIL2 OS=Arabidopsis thaliana GN=ASIL2 PE=2 SV=1//8.36887e-10
Chr1	28076456	28076717	262	Promoter (<=1kb)	28070679	28076428	5750	-	LOC_Os01g48920	-28	sp|Q9M367|BECN1_ARATH Beclin-1-like protein OS=Arabidopsis thaliana GN=At3g61710 PE=2 SV=2//0
Chr1	28101687	28101882	196	Promoter (1-2kb)	28091208	28102930	11723	-	LOC_Os01g48960	1048	sp|Q0JKD0|GLT1_ORYSJ Glutamate synthase 1 [NADH], chloroplastic OS=Oryza sativa subsp. japonica GN=Os01g0681900 PE=2 SV=1//0
Chr1	28277840	28278078	239	Promoter (<=1kb)	28277699	28282019	4321	+	LOC_Os01g49190	141	sp|Q01859|ATPBM_ORYSJ ATP synthase subunit beta, mitochondrial OS=Oryza sativa subsp. japonica GN=ATPB PE=1 SV=2//0
Chr1	28312128	28312323	196	Promoter (<=1kb)	28312054	28317274	5221	+	LOC_Os01g49250	74	sp|Q9D853|MET10_MOUSE Protein-lysine N-methyltransferase Mettl10 OS=Mus musculus GN=Mettl10 PE=2 SV=1//6.85018e-29
Chr1	28337376	28337571	196	Promoter (<=1kb)	28338275	28342473	4199	+	LOC_Os01g49300	-704	sp|P10978|POLX_TOBAC Retrovirus-related Pol polyprotein from transposon TNT 1-94 OS=Nicotiana tabacum PE=2 SV=1//0
Chr1	28379172	28379367	196	Promoter (<=1kb)	28376398	28379686	3289	-	LOC_Os01g49360	319	sp|Q9LYD8|GGLO3_ARATH L-gulonolactone oxidase 3 OS=Arabidopsis thaliana GN=GULLO3 PE=1 SV=1//0
Chr1	28386891	28387235	345	Promoter (<=1kb)	28384020	28387158	3139	-	LOC_Os01g49380	0	sp|Q9C942|CSE_ARATH Caffeoylshikimate esterase OS=Arabidopsis thaliana GN=CSE PE=1 SV=1//2.7746e-50
Chr1	28404451	28404674	224	Promoter (<=1kb)	28403602	28404693	1092	+	LOC_Os01g49390	849	sp|Q94ID3|IPT1_ARATH Adenylate isopentenyltransferase 1, chloroplastic OS=Arabidopsis thaliana GN=IPT1 PE=1 SV=2//2.40177e-47
Chr1	28479379	28479574	196	Promoter (<=1kb)	28479274	28483659	4386	+	LOC_Os01g49510	105	sp|Q7ZVZ7|AB17C_DANRE Alpha/beta hydrolase domain-containing protein 17C OS=Danio rerio GN=abhd17c PE=2 SV=1//3.16863e-70
Chr1	28577345	28577540	196	Promoter (<=1kb)	28578100	28583696	5597	+	LOC_Os01g49760	-560	sp|O49500|MBR2_ARATH E3 ubiquitin-protein ligase MBR2 OS=Arabidopsis thaliana GN=MBR2 PE=1 SV=1//4.38884e-12
Chr1	28578375	28578570	196	Promoter (<=1kb)	28578100	28583696	5597	+	LOC_Os01g49760	275	sp|O49500|MBR2_ARATH E3 ubiquitin-protein ligase MBR2 OS=Arabidopsis thaliana GN=MBR2 PE=1 SV=1//4.38884e-12
Chr1	28586389	28586896	508	Promoter (<=1kb)	28582843	28586527	3685	-	LOC_Os01g49770	0	sp|O49500|MBR2_ARATH E3 ubiquitin-protein ligase MBR2 OS=Arabidopsis thaliana GN=MBR2 PE=1 SV=1//9.76438e-29
Chr1	28620726	28620921	196	Promoter (<=1kb)	28619484	28621118	1635	-	LOC_Os01g49830	197	sp|Q8RZX9|Y1934_ORYSJ AP2/ERF and B3 domain-containing protein Os01g0693400 OS=Oryza sativa subsp. japonica GN=Os01g0693400 PE=2 SV=1//0
Chr1	28722978	28723173	196	Promoter (<=1kb)	28718156	28723385	5230	-	LOC_Os01g49980	212	sp|Q7LHG5|YI31B_YEAST Transposon Ty3-I Gag-Pol polyprotein OS=Saccharomyces cerevisiae (strain ATCC 204508 / S288c) GN=TY3B-I PE=3 SV=2//1.29124e-26
Chr1	28785531	28785742	212	Promoter (<=1kb)	28782784	28785897	3114	-	LOC_Os01g50090	155	sp|P10978|POLX_TOBAC Retrovirus-related Pol polyprotein from transposon TNT 1-94 OS=Nicotiana tabacum PE=2 SV=1//3.32709e-59
Chr1	28934008	28934218	211	Promoter (<=1kb)	28933845	28935210	1366	+	LOC_Os01g50400	163	sp|Q54R82|MKKA_DICDI Mitogen-activated protein kinase kinase kinase A OS=Dictyostelium discoideum GN=mkkA PE=1 SV=2//1.37818e-51
Chr1	29203290	29203587	298	Promoter (<=1kb)	29202409	29203689	1281	-	LOC_Os01g50840	102	sp|Q9LDE3|FBK9_ARATH F-box/kelch-repeat protein At1g23390 OS=Arabidopsis thaliana GN=At1g23390 PE=2 SV=1//2.9366e-21
Chr1	29271463	29271849	387	Promoter (<=1kb)	29271158	29273270	2113	+	LOC_Os01g50940	305	sp|Q9ZPY8|AIB_ARATH Transcription factor ABA-INDUCIBLE bHLH-TYPE OS=Arabidopsis thaliana GN=AIB PE=2 SV=2//3.57098e-79
Chr1	29341811	29342078	268	Distal Intergenic	29345445	29348224	2780	+	LOC_Os01g51080	-3367	sp|Q7LHG5|YI31B_YEAST Transposon Ty3-I Gag-Pol polyprotein OS=Saccharomyces cerevisiae (strain ATCC 204508 / S288c) GN=TY3B-I PE=3 SV=2//2.31186e-10
Chr1	29479197	29479392	196	Promoter (<=1kb)	29479108	29482865	3758	+	LOC_Os01g51280	89	sp|Q3ADI0|SURE_CARHZ 5&apos;-nucleotidase SurE OS=Carboxydothermus hydrogenoformans (strain ATCC BAA-161 / DSM 6008 / Z-2901) GN=surE PE=3 SV=1//1.80599e-17
Chr1	29560415	29560651	237	Promoter (<=1kb)	29560350	29567065	6716	+	LOC_Os01g51410	65	sp|O49954|GCSP_SOLTU Glycine dehydrogenase (decarboxylating), mitochondrial OS=Solanum tuberosum GN=GDCSP PE=2 SV=1//0
Chr1	29739150	29739598	449	Promoter (<=1kb)	29736288	29739449	3162	-	LOC_Os01g51710	0	sp|Q04832|HEXP_LEIMA DNA-binding protein HEXBP OS=Leishmania major GN=HEXBP PE=3 SV=1//6.10912e-06
Chr1	29781565	29781826	262	Promoter (1-2kb)	29780279	29783148	2870	+	LOC_Os01g51790	1286	sp|Q9FND7|PP410_ARATH Putative pentatricopeptide repeat-containing protein At5g40405 OS=Arabidopsis thaliana GN=PCMP-H14 PE=3 SV=1//0
Chr1	29858486	29858785	300	Promoter (2-3kb)	29860846	29866424	5579	+	LOC_Os01g51950	-2061	sp|P10978|POLX_TOBAC Retrovirus-related Pol polyprotein from transposon TNT 1-94 OS=Nicotiana tabacum PE=2 SV=1//1.36856e-12
Chr1	29885162	29885394	233	Promoter (<=1kb)	29881801	29886102	4302	-	LOC_Os01g52000	708	sp|P10978|POLX_TOBAC Retrovirus-related Pol polyprotein from transposon TNT 1-94 OS=Nicotiana tabacum PE=2 SV=1//1.75977e-80
Chr1	30047285	30047492	208	Promoter (<=1kb)	30048291	30049986	1696	+	LOC_Os01g52270	-799	sp|Q7XA40|RGA3_SOLBU Putative disease resistance protein RGA3 OS=Solanum bulbocastanum GN=RGA3 PE=2 SV=2//6.09872e-22
Chr1	30224923	30225118	196	Promoter (<=1kb)	30225839	30226855	1017	+	LOC_Os01g52570	-721	sp|P59082|LFS_ALLCE Lachrymatory-factor synthase OS=Allium cepa GN=LFS PE=1 SV=1//9.70217e-24
Chr1	30488158	30488483	326	Promoter (<=1kb)	30488174	30490501	2328	+	LOC_Os01g53060	0	sp|Q5TZ51|MPV17_DANRE Protein Mpv17 OS=Danio rerio GN=mpv17 PE=2 SV=1//7.71644e-12
Chr1	30579973	30580168	196	Promoter (2-3kb)	30582485	30583743	1259	+	LOC_Os01g53220	-2317	sp|Q942D6|HFC1B_ORYSJ Heat stress transcription factor C-1b OS=Oryza sativa subsp. japonica GN=HSFC1B PE=2 SV=1//1.2336e-159
Chr1	30598647	30598944	298	Promoter (<=1kb)	30593434	30598522	5089	-	LOC_Os01g53250	-125	sp|Q6NPS8|NDOR1_ARATH NADPH-dependent diflavin oxidoreductase 1 OS=Arabidopsis thaliana GN=ATR3 PE=1 SV=1//0
Chr1	30622314	30622681	368	Promoter (<=1kb)	30622671	30634405	11735	+	LOC_Os01g53294	0	sp|O48538|RBOHF_ARATH Respiratory burst oxidase homolog protein F OS=Arabidopsis thaliana GN=RBOHF PE=1 SV=1//0
Chr1	30666066	30666375	310	Promoter (<=1kb)	30666639	30668631	1993	+	LOC_Os01g53370	-264	sp|Q4R1I9|ANGLT_ROSHC Anthocyanidin 5,3-O-glucosyltransferase OS=Rosa hybrid cultivar GN=RhGT1 PE=2 SV=1//3.97532e-116
Chr1	30762743	30763149	407	Promoter (<=1kb)	30764089	30766588	2500	+	LOC_Os01g53570	-940	sp|Q9LS46|ALMT9_ARATH Aluminum-activated malate transporter 9 OS=Arabidopsis thaliana GN=ALMT9 PE=2 SV=1//7.84308e-55
Chr1	30811366	30811578	213	Distal Intergenic	30818942	30823247	4306	+	LOC_Os01g53640	-7364	sp|Q9FFW5|PERK8_ARATH Proline-rich receptor-like protein kinase PERK8 OS=Arabidopsis thaliana GN=PERK8 PE=1 SV=1//5.22081e-167
Chr1	30856708	30857018	311	Promoter (<=1kb)	30850589	30856227	5639	-	LOC_Os01g53700	-481	sp|P29677|MPPA_SOLTU Mitochondrial-processing peptidase subunit alpha OS=Solanum tuberosum GN=MPP PE=1 SV=1//0
Chr1	30902974	30903218	245	Promoter (<=1kb)	30902744	30903058	315	-	LOC_Os01g53760	0	sp|Q8S8F8|GEM_ARATH GLABRA2 expression modulator OS=Arabidopsis thaliana GN=GEM PE=1 SV=1//1.14793e-20
Chr1	30954219	30954482	264	Promoter (<=1kb)	30949378	30954738	5361	-	LOC_Os01g53840	256	sp|F4IB81|LYK3_ARATH LysM domain receptor-like kinase 3 OS=Arabidopsis thaliana GN=LYK3 PE=2 SV=1//0
Chr1	31064026	31064373	348	Promoter (<=1kb)	31065121	31070148	5028	+	LOC_Os01g54010	-748	sp|Q9M1S8|GCP2_ARATH Probable glutamate carboxypeptidase 2 OS=Arabidopsis thaliana GN=AMP1 PE=1 SV=3//1.97437e-158
Chr1	31122291	31122750	460	Intron (LOC_Os01g54119.1/LOC_Os01g54119, intron 14 of 20)	31111291	31116151	4861	-	LOC_Os01g54100	-6140	sp|P40234|CKI2_SCHPO Casein kinase I homolog 2 OS=Schizosaccharomyces pombe (strain 972 / ATCC 24843) GN=cki2 PE=1 SV=2//1.73495e-53
Chr1	31228218	31228508	291	Promoter (<=1kb)	31220321	31228566	8246	-	LOC_Os01g54270	58	sp|Q8LIY8|CCD8B_ORYSJ Carotenoid cleavage dioxygenase 8 homolog B, chloroplastic OS=Oryza sativa subsp. japonica GN=CCD8B PE=1 SV=1//0
Chr1	31366154	31366405	252	Promoter (<=1kb)	31367015	31369416	2402	+	LOC_Os01g54540	-610	sp|Q9SYL9|RK13_ARATH 50S ribosomal protein L13, chloroplastic OS=Arabidopsis thaliana GN=RPL13 PE=2 SV=1//2.04441e-92
Chr1	31367124	31367397	274	Promoter (<=1kb)	31367015	31369416	2402	+	LOC_Os01g54540	109	sp|Q9SYL9|RK13_ARATH 50S ribosomal protein L13, chloroplastic OS=Arabidopsis thaliana GN=RPL13 PE=2 SV=1//2.04441e-92
Chr1	31390307	31390502	196	Promoter (<=1kb)	31391261	31392235	975	+	LOC_Os01g54570	-759	sp|O04351|OFP2_ARATH Transcription repressor OFP2 OS=Arabidopsis thaliana GN=OFP2 PE=1 SV=1//8.17847e-18
Chr1	31391708	31392023	316	Promoter (<=1kb)	31391261	31392235	975	+	LOC_Os01g54570	447	sp|O04351|OFP2_ARATH Transcription repressor OFP2 OS=Arabidopsis thaliana GN=OFP2 PE=1 SV=1//8.17847e-18
Chr1	31541488	31541683	196	Promoter (1-2kb)	31533340	31540054	6715	-	LOC_Os01g54830	-1434	sp|P0CT40|TF29_SCHPO Transposon Tf2-9 polyprotein OS=Schizosaccharomyces pombe (strain 972 / ATCC 24843) GN=Tf2-9 PE=3 SV=1//1.72486e-17
Chr1	31548618	31548813	196	Promoter (1-2kb)	31550655	31553052	2398	+	LOC_Os01g54850	-1842	sp|Q9FFW2|FBD17_ARATH FBD-associated F-box protein At5g38590 OS=Arabidopsis thaliana GN=At5g38590 PE=2 SV=1//5.29184e-08
Chr1	31568095	31568560	466	Promoter (<=1kb)	31567891	31568741	851	+	LOC_Os01g54890	204	sp|O04681|PTI5_SOLLC Pathogenesis-related genes transcriptional activator PTI5 OS=Solanum lycopersicum GN=PTI5 PE=2 SV=1//3.42708e-11
Chr1	31851032	31851315	284	Promoter (<=1kb)	31850537	31851619	1083	-	LOC_Os01g55340	304	sp|O22967|CDF4_ARATH Cyclic dof factor 4 OS=Arabidopsis thaliana GN=CDF4 PE=2 SV=1//9.05531e-29
Chr1	31901647	31902097	451	Distal Intergenic	31909559	31911650	2092	+	LOC_Os01g55390	-7462	sp|P0CT40|TF29_SCHPO Transposon Tf2-9 polyprotein OS=Schizosaccharomyces pombe (strain 972 / ATCC 24843) GN=Tf2-9 PE=3 SV=1//1.28134e-83
Chr1	32038762	32038957	196	Promoter (1-2kb)	32038018	32040378	2361	-	LOC_Os01g55610	1421	sp|Q9M817|PTR6_ARATH Protein NRT1/ PTR FAMILY 1.2 OS=Arabidopsis thaliana GN=NPF1.2 PE=1 SV=1//8.83245e-151
Chr1	32062347	32062576	230	Promoter (<=1kb)	32057383	32062829	5447	-	LOC_Os01g55650	253	sp|Q9LZA6|SDP1_ARATH Triacylglycerol lipase SDP1 OS=Arabidopsis thaliana GN=SDP1 PE=1 SV=1//0
Chr1	32070034	32070444	411	Promoter (<=1kb)	32065489	32069846	4358	-	LOC_Os01g55660	-188	sp|P10978|POLX_TOBAC Retrovirus-related Pol polyprotein from transposon TNT 1-94 OS=Nicotiana tabacum PE=2 SV=1//0
Chr1	32181474	32181900	427	Promoter (<=1kb)	32177890	32181792	3903	-	LOC_Os01g55880	0	sp|Q8VDH1|FBX21_MOUSE F-box only protein 21 OS=Mus musculus GN=Fbxo21 PE=2 SV=1//1.09339e-09
Chr1	32206325	32206560	236	Promoter (<=1kb)	32206224	32211250	5027	+	LOC_Os01g55910	101	sp|P04323|POL3_DROME Retrovirus-related Pol polyprotein from transposon 17.6 OS=Drosophila melanogaster GN=pol PE=3 SV=1//1.19779e-26
Chr1	32221130	32221341	212	Promoter (<=1kb)	32221376	32225123	3748	+	LOC_Os01g55940	-35	sp|P0C0M2|GH32_ORYSJ Probable indole-3-acetic acid-amido synthetase GH3.2 OS=Oryza sativa subsp. japonica GN=GH3.2 PE=2 SV=1//0
Chr1	32322263	32322526	264	Promoter (<=1kb)	32318613	32322673	4061	-	LOC_Os01g56130	147	sp|Q8LIY0|CSLC1_ORYSJ Probable xyloglucan glycosyltransferase 1 OS=Oryza sativa subsp. japonica GN=CSLC1 PE=3 SV=1//0
Chr1	32368580	32368907	328	Promoter (<=1kb)	32367683	32371816	4134	+	LOC_Os01g56200	897	sp|Q8L746|NPR3_ARATH Regulatory protein NPR3 OS=Arabidopsis thaliana GN=NPR3 PE=1 SV=1//3.50586e-159
Chr1	32388353	32388580	228	Promoter (<=1kb)	32386510	32388520	2011	-	LOC_Os01g56235	0	sp|Q93W28|Y4554_ARATH Uncharacterized protein At4g15545 OS=Arabidopsis thaliana GN=At4g15545 PE=1 SV=1//3.40788e-31
Chr1	32440135	32440460	326	Promoter (<=1kb)	32440171	32443318	3148	+	LOC_Os01g56310	0	sp|Q5ZAQ2|LISC1_ORYSJ Lipoyl synthase 1, chloroplastic OS=Oryza sativa subsp. japonica GN=LIP1P-1 PE=3 SV=1//0
Chr1	32478182	32478377	196	Promoter (<=1kb)	32475143	32479148	4006	-	LOC_Os01g56360	771	sp|Q93ZR6|WSD1_ARATH O-acyltransferase WSD1 OS=Arabidopsis thaliana GN=WSD1 PE=2 SV=1//7.66106e-94
Chr1	32489147	32489342	196	Promoter (<=1kb)	32484736	32489971	5236	-	LOC_Os01g56370	629	sp|Q93ZR6|WSD1_ARATH O-acyltransferase WSD1 OS=Arabidopsis thaliana GN=WSD1 PE=2 SV=1//1.43776e-31
Chr1	32511381	32511595	215	Promoter (<=1kb)	32508396	32511902	3507	-	LOC_Os01g56390	307	sp|Q9FNK5|FB285_ARATH F-box protein At5g46170 OS=Arabidopsis thaliana GN=At5g46170 PE=2 SV=1//9.56928e-114
Chr1	32523544	32523770	227	Promoter (<=1kb)	32523328	32524183	856	+	LOC_Os01g56420	216	sp|Q94EE4|COPT1_ORYSJ Copper transporter 1 OS=Oryza sativa subsp. japonica GN=COPT1 PE=2 SV=1//8.90062e-51
Chr1	32593766	32594010	245	Promoter (<=1kb)	32592867	32593956	1090	-	LOC_Os01g56530	0	sp|Q9SRV3|LBD20_ARATH LOB domain-containing protein 20 OS=Arabidopsis thaliana GN=LBD20 PE=2 SV=1//9.16552e-20
Chr1	32603820	32604015	196	Promoter (2-3kb)	32598081	32601810	3730	-	LOC_Os01g56550	-2010	sp|P41900|T2FB_DROME General transcription factor IIF subunit 2 OS=Drosophila melanogaster GN=TfIIFbeta PE=2 SV=2//1.09391e-11
Chr1	32608693	32608975	283	Promoter (<=1kb)	32608681	32611045	2365	+	LOC_Os01g56560	12	sp|Q6PBN4|CQ10X_DANRE Coenzyme Q-binding protein COQ10 homolog, mitochondrial OS=Danio rerio GN=zgc:73324 PE=2 SV=2//3.67933e-32
Chr1	32869553	32869789	237	Promoter (<=1kb)	32869293	32878216	8924	+	LOC_Os01g56910	260	sp|Q8WTW3|COG1_HUMAN Conserved oligomeric Golgi complex subunit 1 OS=Homo sapiens GN=COG1 PE=1 SV=1//2.50099e-28
Chr1	32887051	32887298	248	Promoter (<=1kb)	32886850	32892644	5795	+	LOC_Os01g56930	201	sp|Q9S9K4|ASPL2_ARATH Aspartic proteinase-like protein 2 OS=Arabidopsis thaliana GN=At1g65240 PE=1 SV=2//1.7514e-71
Chr1	33182612	33182934	323	Promoter (<=1kb)	33182589	33186170	3582	+	LOC_Os01g57410	23	sp|Q3EDF8|PPR28_ARATH Pentatricopeptide repeat-containing protein At1g09900 OS=Arabidopsis thaliana GN=At1g09900 PE=2 SV=1//1.66748e-13
Chr1	33607105	33607453	349	Promoter (1-2kb)	33601330	33605260	3931	-	LOC_Os01g58100	-1845	sp|P43309|PPO_MALDO Polyphenol oxidase, chloroplastic OS=Malus domestica PE=2 SV=1//2.67826e-156
Chr1	33654039	33654234	196	Promoter (<=1kb)	33651142	33655180	4039	-	LOC_Os01g58220	946	sp|Q0D5W6|SUI1_ORYSJ Protein translation factor SUI1 homolog OS=Oryza sativa subsp. japonica GN=GOS2 PE=3 SV=1//1.23182e-60
Chr1	33657361	33657575	215	Promoter (<=1kb)	33655974	33658202	2229	-	LOC_Os01g58230	627	sp|Q9SIT5|CHX15_ARATH Cation/H(+) antiporter 15 OS=Arabidopsis thaliana GN=CHX15 PE=2 SV=1//1.08827e-08
Chr1	33682239	33682620	382	Promoter (2-3kb)	33684778	33688225	3448	+	LOC_Os01g58280	-2158	sp|Q9MAP7|SBT35_ARATH Subtilisin-like protease SBT3.5 OS=Arabidopsis thaliana GN=SBT3.5 PE=1 SV=1//0
Chr1	33682711	33683359	649	Promoter (1-2kb)	33684778	33688225	3448	+	LOC_Os01g58280	-1419	sp|Q9MAP7|SBT35_ARATH Subtilisin-like protease SBT3.5 OS=Arabidopsis thaliana GN=SBT3.5 PE=1 SV=1//0
Chr1	33764536	33764731	196	Promoter (2-3kb)	33766979	33768085	1107	+	LOC_Os01g58420	-2248	sp|O80340|ERF78_ARATH Ethylene-responsive transcription factor 4 OS=Arabidopsis thaliana GN=ERF4 PE=1 SV=1//1.54503e-18
Chr1	33884926	33885121	196	Promoter (<=1kb)	33884920	33887413	2494	+	LOC_Os01g58610	6	sp|P12782|PGKH_WHEAT Phosphoglycerate kinase, chloroplastic OS=Triticum aestivum PE=2 SV=1//0
Chr1	34062414	34062609	196	Promoter (2-3kb)	34051207	34060334	9128	-	LOC_Os01g58920	-2080	sp|P0CT39|TF26_SCHPO Transposon Tf2-6 polyprotein OS=Schizosaccharomyces pombe (strain 972 / ATCC 24843) GN=Tf2-6 PE=3 SV=1//1.07615e-122
Chr1	34130349	34130887	539	Promoter (<=1kb)	34131829	34133381	1553	+	LOC_Os01g59050	-942	sp|O81117|C94A1_VICSA Cytochrome P450 94A1 OS=Vicia sativa GN=CYP94A1 PE=2 SV=2//2.95836e-115
Chr1	34131230	34131425	196	Promoter (<=1kb)	34131829	34133381	1553	+	LOC_Os01g59050	-404	sp|O81117|C94A1_VICSA Cytochrome P450 94A1 OS=Vicia sativa GN=CYP94A1 PE=2 SV=2//2.95836e-115
Chr1	34201697	34202080	384	Promoter (<=1kb)	34201519	34202743	1225	+	LOC_Os01g59200	178	sp|O22227|MIZ1_ARATH Protein MIZU-KUSSEI 1 OS=Arabidopsis thaliana GN=MIZ1 PE=1 SV=1//1.02462e-47
Chr1	34406345	34406640	296	Promoter (<=1kb)	34406376	34409218	2843	+	LOC_Os01g59490	0	sp|Q9N4Z0|L2HDH_CAEEL L-2-hydroxyglutarate dehydrogenase, mitochondrial OS=Caenorhabditis elegans GN=Y45G12B.3 PE=3 SV=2//9.92209e-35
Chr1	34601001	34601397	397	Promoter (1-2kb)	34588827	34602432	13606	-	LOC_Os01g59819	1035	sp|B7F8N7|BGL02_ORYSJ Beta-glucosidase 2 OS=Oryza sativa subsp. japonica GN=BGLU2 PE=2 SV=1//0
Chr1	34690160	34690404	245	Promoter (<=1kb)	34689869	34691517	1649	+	LOC_Os01g60010	291	sp|Q9LFQ4|PP383_ARATH Pentatricopeptide repeat-containing protein At5g15010, mitochondrial OS=Arabidopsis thaliana GN=At5g15010 PE=2 SV=2//1.20316e-141
Chr1	34801654	34801905	252	Promoter (<=1kb)	34801146	34802261	1116	+	LOC_Os01g60170	508	sp|Q9ZVI6|LOR8_ARATH Protein LURP-one-related 8 OS=Arabidopsis thaliana GN=At2g38640 PE=2 SV=1//1.46138e-35
Chr1	34937087	34937445	359	Promoter (<=1kb)	34937720	34941996	4277	+	LOC_Os01g60410	-275	sp|P35135|UBC4_SOLLC Ubiquitin-conjugating enzyme E2-17 kDa OS=Solanum lycopersicum PE=2 SV=1//2.33396e-99
Chr1	35027050	35027245	196	Promoter (<=1kb)	35025603	35027670	2068	-	LOC_Os01g60590	425	sp|Q9FHE1|GSTT3_ARATH Glutathione S-transferase T3 OS=Arabidopsis thaliana GN=GSTT3 PE=2 SV=1//4.95626e-12
Chr1	35085412	35085607	196	Promoter (<=1kb)	35081925	35085588	3664	-	LOC_Os01g60670	0	sp|Q9LY03|IRK_ARATH Probable LRR receptor-like serine/threonine-protein kinase IRK OS=Arabidopsis thaliana GN=IRK PE=1 SV=1//0
Chr1	35121966	35122204	239	Promoter (<=1kb)	35121625	35122986	1362	-	LOC_Os01g60730	782	sp|Q9SG96|ATL72_ARATH RING-H2 finger protein ATL72 OS=Arabidopsis thaliana GN=ATL72 PE=2 SV=1//3.73274e-23
Chr1	35318615	35318810	196	Promoter (<=1kb)	35314359	35318845	4487	-	LOC_Os01g61030	35	sp|Q5SRX1|TM1L2_MOUSE TOM1-like protein 2 OS=Mus musculus GN=Tom1l2 PE=2 SV=1//3.84392e-33
Chr1	35836124	35836325	202	Promoter (<=1kb)	35832966	35836375	3410	-	LOC_Os01g61910	50	sp|P0DMS1|NET2A_ARATH Protein NETWORKED 2A OS=Arabidopsis thaliana GN=NET2A PE=2 SV=1//2.31923e-146
Chr1	35861519	35861719	201	Promoter (<=1kb)	35861147	35863908	2762	+	LOC_Os01g61940	372	sp|O80946|AB1G_ARATH ABC transporter G family member 1 OS=Arabidopsis thaliana GN=ABCG1 PE=2 SV=1//0
Chr1	35887922	35888143	222	Promoter (<=1kb)	35884769	35888563	3795	-	LOC_Os01g61990	420	sp|Q9C7A2|Y3236_ARATH Ankyrin repeat-containing protein At3g12360 OS=Arabidopsis thaliana GN=At3g12360 PE=2 SV=1//0
Chr1	36030487	36030682	196	Promoter (<=1kb)	36029785	36030969	1185	-	LOC_Os01g62260	287	sp|Q41350|OLP1_SOLLC Osmotin-like protein OS=Solanum lycopersicum PE=1 SV=1//1.31062e-95
Chr1	36146934	36147151	218	Promoter (<=1kb)	36141662	36146302	4641	-	LOC_Os01g62440	-632	sp|Q6NQJ6|RNR1_ARATH Ribonuclease II, chloroplastic/mitochondrial OS=Arabidopsis thaliana GN=RNR1 PE=2 SV=1//0
Chr1	36269386	36269587	202	Promoter (<=1kb)	36268063	36269737	1675	-	LOC_Os01g62630	150	sp|Q9LZL3|PCS1L_ARATH Aspartic proteinase PCS1 OS=Arabidopsis thaliana GN=PCS1 PE=2 SV=1//8.96447e-133
Chr1	36442505	36442742	238	Promoter (<=1kb)	36438948	36442944	3997	-	LOC_Os01g62910	202	sp|Q9STF3|PP265_ARATH Pentatricopeptide repeat-containing protein At3g46790, chloroplastic OS=Arabidopsis thaliana GN=CRR2 PE=2 SV=1//4.54169e-07
Chr1	36564067	36564501	435	Promoter (<=1kb)	36564186	36569809	5624	+	LOC_Os01g63100	0	sp|Q7LHG5|YI31B_YEAST Transposon Ty3-I Gag-Pol polyprotein OS=Saccharomyces cerevisiae (strain ATCC 204508 / S288c) GN=TY3B-I PE=3 SV=2//8.68922e-37
Chr1	36696951	36697146	196	Promoter (1-2kb)	36687545	36695629	8085	-	LOC_Os01g63290	-1322	sp|Q8W0H5|PHT43_ORYSJ Probable anion transporter 3, chloroplastic OS=Oryza sativa subsp. japonica GN=PHT4;3 PE=2 SV=1//0
Chr1	36747827	36748101	274	Promoter (<=1kb)	36747521	36750925	3105	+	LOC_Os01g63420	313	sp CORONATINE INSENSITIVE 1, coronatine insensitive 1a, CORONATINE INSENSITIVE1, coronatine insensitive 1, F-box-type E3 ubiquitin ligase L4
Chr1	37021601	37021803	203	Promoter (<=1kb)	37021544	37024131	2588	+	LOC_Os01g63810	57	sp|P36914|AMYG_ASPOR Glucoamylase OS=Aspergillus oryzae (strain ATCC 42149 / RIB 40) GN=glaA PE=2 SV=2//4.3157e-09
Chr1	37035300	37035573	274	Promoter (<=1kb)	37034026	37036018	1993	-	LOC_Os01g63830	445	sp|Q56Y11|DDPS2_ARATH Dehydrodolichyl diphosphate synthase 2 OS=Arabidopsis thaliana GN=At5g58770 PE=2 SV=2//2.90945e-92
Chr1	37043022	37043260	239	Promoter (<=1kb)	37039556	37043234	3679	-	LOC_Os01g63840	0	sp|Q8VZA5|KDTA_ARATH Probable 3-deoxy-D-manno-octulosonic acid transferase, mitochondrial OS=Arabidopsis thaliana GN=KDTA PE=2 SV=1//1.34948e-138
Chr1	37089169	37089455	287	Promoter (<=1kb)	37080289	37088947	8659	-	LOC_Os01g63910	-222	sp|Q8BL74|TF3C2_MOUSE General transcription factor 3C polypeptide 2 OS=Mus musculus GN=Gtf3c2 PE=2 SV=2//1.51551e-07
Chr1	37165206	37165559	354	Distal Intergenic	37174547	37176344	1798	+	LOC_Os01g64000	-8988	sp|Q8RYD6|AI5L1_ARATH ABSCISIC ACID-INSENSITIVE 5-like protein 1 OS=Arabidopsis thaliana GN=DPBF2 PE=1 SV=1//8.43078e-39
Chr1	37197894	37198311	418	Promoter (<=1kb)	37190435	37197804	7370	-	LOC_Os01g64030	-90	sp|Q9ZW88|FBL34_ARATH F-box/LRR-repeat protein At1g67190 OS=Arabidopsis thaliana GN=At1g67190 PE=2 SV=1//1.25482e-174
Chr1	37252957	37253350	394	Distal Intergenic	37248844	37249416	573	-	LOC_Os01g64140	-3541	sp|Q654U4|GUN16_ORYSJ Endoglucanase 16 OS=Oryza sativa subsp. japonica GN=Os06g0247900 PE=2 SV=2//9.18789e-15
Chr1	37407944	37408185	242	Promoter (<=1kb)	37406183	37407241	1059	-	LOC_Os01g64450	-703	sp|Q9SJ52|YLS9_ARATH Protein YLS9 OS=Arabidopsis thaliana GN=YLS9 PE=2 SV=1//4.83207e-19
Chr1	37412730	37412925	196	Promoter (<=1kb)	37412000	37413011	1012	-	LOC_Os01g64470	86	sp|Q9SJ52|YLS9_ARATH Protein YLS9 OS=Arabidopsis thaliana GN=YLS9 PE=2 SV=1//7.04486e-22
Chr1	37529695	37529890	196	Promoter (<=1kb)	37527399	37529102	1704	-	LOC_Os01g64690	-593	sp|Q9C6K5|LSM3B_ARATH Sm-like protein LSM3B OS=Arabidopsis thaliana GN=LSM3B PE=1 SV=1//6.24244e-52
Chr1	37565149	37565425	277	Promoter (<=1kb)	37566051	37575992	9942	+	LOC_Os01g64750	-626	sp|Q9XIG1|U80B1_ARATH Sterol 3-beta-glucosyltransferase UGT80B1 OS=Arabidopsis thaliana GN=UGT80B1 PE=2 SV=1//0
Chr1	37592094	37592530	437	Promoter (<=1kb)	37589452	37592446	2995	-	LOC_Os01g64790	0	sp|Q70II3|EF110_ARATH Ethylene-responsive transcription factor ERF110 OS=Arabidopsis thaliana GN=ERF110 PE=2 SV=2//1.02703e-16
Chr1	37635860	37636055	196	Promoter (<=1kb)	37625795	37636034	10240	-	LOC_Os01g64820	0	sp|O48653|DPOLA_ORYSJ DNA polymerase alpha catalytic subunit OS=Oryza sativa subsp. japonica GN=Os01g0868300 PE=2 SV=2//0
Chr1	37662656	37662976	321	Promoter (<=1kb)	37661778	37662433	656	-	LOC_Os01g64880	-223	sp|P0CW78|HMA3B_ARATH Cadmium/zinc-transporting ATPase HMA3 OS=Arabidopsis thaliana GN=HMA3 PE=1 SV=1//1.74756e-10
Chr1	37720161	37720538	378	Promoter (<=1kb)	37714296	37720652	6357	-	LOC_Os01g64980	114	sp|Q5N941|POLLU_ORYSJ Probable ion channel POLLUX OS=Oryza sativa subsp. japonica GN=Os01g0870100 PE=2 SV=1//0
Chr1	37789403	37789646	244	Promoter (<=1kb)	37790111	37792998	2888	+	LOC_Os01g65100	-465	sp|Q0WP01|PTR9_ARATH Protein NRT1/ PTR FAMILY 5.10 OS=Arabidopsis thaliana GN=NPF5.10 PE=2 SV=1//9.88068e-25
Chr1	38195823	38196319	497	Promoter (<=1kb)	38197017	38202617	5601	+	LOC_Os01g65780	-698	sp|Q9LSB1|GUX1_ARATH UDP-glucuronate:xylan alpha-glucuronosyltransferase 1 OS=Arabidopsis thaliana GN=GUX1 PE=2 SV=1//0
Chr1	38224455	38224650	196	Promoter (<=1kb)	38224419	38226031	1613	+	LOC_Os01g65830	36	sp|Q8LJJ9|STAD1_ORYSJ Acyl-[acyl-carrier-protein] desaturase 1, chloroplastic OS=Oryza sativa subsp. japonica GN=Os01g0880800 PE=2 SV=1//0
Chr1	38382678	38382919	242	Promoter (<=1kb)	38382382	38385504	3123	+	LOC_Os01g66100	296	sp|Q0JH50|GAOX2_ORYSJ Gibberellin 20 oxidase 2 OS=Oryza sativa subsp. japonica GN=20ox2 PE=1 SV=1//0
Chr1	38489743	38490041	299	Promoter (<=1kb)	38489525	38490169	645	+	LOC_Os01g66270	218	sp|Q9C9I8|ERF20_ARATH Ethylene-responsive transcription factor ERF020 OS=Arabidopsis thaliana GN=ERF020 PE=2 SV=1//6.60556e-18
Chr1	38534943	38535138	196	Promoter (<=1kb)	38534823	38540370	5548	+	LOC_Os01g66350	120	sp|Q93YU2|RUS6_ARATH Protein root UVB sensitive 6 OS=Arabidopsis thaliana GN=RUS6 PE=2 SV=1//0
Chr1	38541116	38541375	260	Promoter (<=1kb)	38541818	38546204	4387	+	LOC_Os01g66360	-443	sp|Q5N8G1|ISPD_ORYSJ 2-C-methyl-D-erythritol 4-phosphate cytidylyltransferase, chloroplastic OS=Oryza sativa subsp. japonica GN=ISPD PE=2 SV=1//0
Chr1	38541748	38541947	200	Promoter (<=1kb)	38541818	38546204	4387	+	LOC_Os01g66360	0	sp|Q5N8G1|ISPD_ORYSJ 2-C-methyl-D-erythritol 4-phosphate cytidylyltransferase, chloroplastic OS=Oryza sativa subsp. japonica GN=ISPD PE=2 SV=1//0
Chr1	38917590	38917788	199	Promoter (1-2kb)	38916092	38918071	1980	+	LOC_Os01g67010	1498	sp|Q0WRW8|B561K_ARATH Cytochrome b561 and DOMON domain-containing protein At3g07570 OS=Arabidopsis thaliana GN=At3g07570 PE=2 SV=1//1.01223e-24
Chr1	39017371	39017566	196	Promoter (<=1kb)	39013759	39017951	4193	-	LOC_Os01g67240	385	sp|Q8S0F0|FH1_ORYSJ Formin-like protein 1 OS=Oryza sativa subsp. japonica GN=FH1 PE=2 SV=1//0
Chr1	39105230	39105425	196	Promoter (<=1kb)	39102276	39105764	3489	-	LOC_Os01g67360	339	sp|Q9SZX8|PMTH_ARATH Probable methyltransferase PMT17 OS=Arabidopsis thaliana GN=At4g10440 PE=3 SV=1//1.32521e-155
Chr1	39158218	39158489	272	Promoter (<=1kb)	39158153	39165729	7577	+	LOC_Os01g67420	65	sp|Q91WC9|DGLB_MOUSE Sn1-specific diacylglycerol lipase beta OS=Mus musculus GN=Daglb PE=1 SV=2//9.05863e-12
Chr1	39243693	39243889	197	Promoter (<=1kb)	39238786	39243986	5201	-	LOC_Os01g67510	97	sp|Q9ZUP2|RECA3_ARATH DNA repair protein recA homolog 3, mitochondrial OS=Arabidopsis thaliana GN=At2g19490 PE=2 SV=2//1.90258e-164
Chr1	39299021	39299307	287	Promoter (<=1kb)	39296926	39299837	2912	-	LOC_Os01g67600	530	sp|Q8LED9|CXE16_ARATH Probable carboxylesterase 16 OS=Arabidopsis thaliana GN=CXE16 PE=2 SV=1//1.64412e-178
Chr1	39307967	39308237	271	Promoter (<=1kb)	39307459	39310577	3119	+	LOC_Os01g67630	508	sp|Q9M390|PTR1_ARATH Protein NRT1/ PTR FAMILY 8.1 OS=Arabidopsis thaliana GN=NPF8.1 PE=1 SV=1//0
Chr1	39319922	39320117	196	Promoter (<=1kb)	39319389	39320987	1599	+	LOC_Os01g67650	533	sp|Q7Y1B6|GAI_SOLLC DELLA protein GAI OS=Solanum lycopersicum GN=GAI PE=2 SV=1//9.59418e-58
Chr1	39554961	39555244	284	Promoter (<=1kb)	39551421	39555254	3834	-	LOC_Os01g68040	10	sp|Q8L4S2|MRS2F_ORYSJ Magnesium transporter MRS2-F OS=Oryza sativa subsp. japonica GN=MRS2-F PE=1 SV=1//0
Chr1	39692083	39692278	196	Promoter (<=1kb)	39688260	39693159	4900	-	LOC_Os01g68320	881	sp|Q5N7W4|RH30_ORYSJ DEAD-box ATP-dependent RNA helicase 30 OS=Oryza sativa subsp. japonica GN=Os01g0911100 PE=2 SV=2//1.02637e-18
Chr1	39748471	39748721	251	Promoter (2-3kb)	39750894	39756839	5946	+	LOC_Os01g68410	-2173	sp|P0CT40|TF29_SCHPO Transposon Tf2-9 polyprotein OS=Schizosaccharomyces pombe (strain 972 / ATCC 24843) GN=Tf2-9 PE=3 SV=1//3.29881e-97
Chr1	39798284	39798524	241	Promoter (<=1kb)	39794226	39799341	5116	-	LOC_Os01g68490	817	sp|Q9FHR3|PP403_ARATH Putative pentatricopeptide repeat-containing protein At5g37570 OS=Arabidopsis thaliana GN=PCMP-E37 PE=3 SV=1//7.80216e-08
Chr1	39878996	39879191	196	Promoter (<=1kb)	39878959	39879405	447	+	LOC_Os01g68670	37	sp|Q0JGM8|CYT5_ORYSJ Cysteine proteinase inhibitor 5 OS=Oryza sativa subsp. japonica GN=Os01g0915401 PE=3 SV=2//6.1136e-50
Chr1	40141833	40142208	376	Promoter (<=1kb)	40136225	40142764	6540	-	LOC_Os01g69070	556	sp|Q5JLM1|PIN6_ORYSJ Probable auxin efflux carrier component 6 OS=Oryza sativa subsp. japonica GN=PIN6 PE=2 SV=1//0
Chr1	40220993	40221188	196	Promoter (<=1kb)	40221119	40226593	5475	+	LOC_Os01g69210	0	sp|F4HTM3|GCS1_ARATH Mannosyl-oligosaccharide glucosidase GCS1 OS=Arabidopsis thaliana GN=GCS1 PE=1 SV=1//0
Chr1	40257232	40257754	523	Promoter (<=1kb)	40256803	40258472	1670	-	LOC_Os01g69270	718	sp|Q9FYF9|FB76_ARATH F-box protein At1g67340 OS=Arabidopsis thaliana GN=At1g67340 PE=1 SV=1//1.16187e-66
Chr1	40332065	40332265	201	Promoter (<=1kb)	40331733	40335718	3986	+	LOC_Os01g69830	332	sp|Q0JGI1|SPL2_ORYSJ Squamosa promoter-binding-like protein 2 OS=Oryza sativa subsp. japonica GN=SPL2 PE=2 SV=2//5.53554e-180
Chr1	40563663	40564017	355	Promoter (<=1kb)	40563530	40566440	2911	+	LOC_Os01g70090	133	sp|O35459|ECH1_MOUSE Delta(3,5)-Delta(2,4)-dienoyl-CoA isomerase, mitochondrial OS=Mus musculus GN=Ech1 PE=1 SV=1//3.62035e-46
Chr1	40606561	40606772	212	Promoter (<=1kb)	40607531	40610341	2811	+	LOC_Os01g70160	-759	sp|Q8LE94|RING3_ARATH E3 ubiquitin-protein ligase At3g02290 OS=Arabidopsis thaliana GN=At3g02290 PE=2 SV=1//7.7481e-52
Chr1	40730205	40730543	339	Promoter (<=1kb)	40723385	40730507	7123	-	LOC_Os01g70320	0	sp|Q8RWD5|SCD2_ARATH Coiled-coil domain-containing protein SCD2 OS=Arabidopsis thaliana GN=SCD2 PE=1 SV=1//2.83331e-161
Chr1	40849471	40849742	272	Promoter (<=1kb)	40849226	40850197	972	+	LOC_Os01g70525	245	sp|Q9LHT0|TRNHF_ARATH Tropinone reductase homolog At5g06060 OS=Arabidopsis thaliana GN=At5g06060 PE=2 SV=1//1.09081e-72
Chr1	40942775	40942970	196	Promoter (<=1kb)	40942204	40943109	906	-	LOC_Os01g70730	139	sp|Q8LR63|FLP2_ORYSJ Flowering-promoting factor 1-like protein 2 OS=Oryza sativa subsp. japonica GN=Os01g0933500 PE=2 SV=1//1.01927e-63
Chr1	41005691	41005886	196	Promoter (<=1kb)	41004288	41006137	1850	-	LOC_Os01g70850	251	sp|Q0JG99|PIR7B_ORYSJ Esterase PIR7B OS=Oryza sativa subsp. japonica GN=PIR7B PE=2 SV=2//1.31485e-58
Chr1	41008226	41008526	301	Promoter (<=1kb)	41007321	41009242	1922	-	LOC_Os01g70860	716	sp|Q0JG98|PIR7A_ORYSJ Probable esterase PIR7A OS=Oryza sativa subsp. japonica GN=PIR7A PE=3 SV=2//2.15634e-156
Chr1	41029387	41029645	259	Promoter (<=1kb)	41028601	41030025	1425	-	LOC_Os01g70890	380	sp|O82248|NFYB5_ARATH Nuclear transcription factor Y subunit B-5 OS=Arabidopsis thaliana GN=NFYB5 PE=2 SV=1//1.67765e-50
Chr1	41313997	41314305	309	Promoter (<=1kb)	41305317	41314527	9211	-	LOC_Os01g71320	222	sp|Q2KNB4|HXK3_ORYSJ Hexokinase-3 OS=Oryza sativa subsp. japonica GN=HXK3 PE=2 SV=1//0
Chr1	41524968	41525364	397	Promoter (<=1kb)	41525723	41526415	693	+	LOC_Os01g71650	-359	sp|P49237|E13B_MAIZE Glucan endo-1,3-beta-glucosidase, acidic isoform OS=Zea mays PE=2 SV=1//6.22876e-79
Chr1	41712645	41712914	270	Promoter (<=1kb)	41711881	41713811	1931	+	LOC_Os01g71970	764	sp|Q9LPR8|SCL3_ARATH Scarecrow-like protein 3 OS=Arabidopsis thaliana GN=SCL3 PE=2 SV=1//5.58703e-123
Chr1	41725659	41725854	196	Promoter (<=1kb)	41722424	41726252	3829	-	LOC_Os01g72000	398	sp|Q9SFX2|PUB43_ARATH U-box domain-containing protein 43 OS=Arabidopsis thaliana GN=PUB43 PE=2 SV=1//4.55495e-37
Chr1	41743804	41744048	245	Promoter (<=1kb)	41741160	41744666	3507	-	LOC_Os01g72020	618	sp|Q9ZVC2|NPR5_ARATH Regulatory protein NPR5 OS=Arabidopsis thaliana GN=NPR5 PE=1 SV=1//0
Chr1	41869501	41869726	226	Promoter (<=1kb)	41867501	41869645	2145	-	LOC_Os01g72205	0	sp|Q9Z2Y8|PROSC_MOUSE Proline synthase co-transcribed bacterial homolog protein OS=Mus musculus GN=Prosc PE=1 SV=1//1.84045e-63
Chr1	42123388	42123716	329	Promoter (<=1kb)	42122517	42123788	1272	-	LOC_Os01g72600	72	sp|O22193|PUB4_ARATH U-box domain-containing protein 4 OS=Arabidopsis thaliana GN=PUB4 PE=1 SV=3//4.93615e-08
Chr1	42202466	42202694	229	Promoter (<=1kb)	42202447	42203895	1449	+	LOC_Os01g72730	19	sp|O48923|C71DA_SOYBN Cytochrome P450 71D10 OS=Glycine max GN=CYP71D10 PE=2 SV=1//1.55413e-12
Chr1	42237069	42237396	328	Promoter (<=1kb)	42234584	42237458	2875	-	LOC_Os01g72800	62	sp|O80842|CFTSY_ARATH Cell division protein FtsY homolog, chloroplastic OS=Arabidopsis thaliana GN=CPFTSY PE=1 SV=2//0
Chr1	42294794	42295050	257	Promoter (2-3kb)	42297255	42300253	2999	+	LOC_Os01g72930	-2205	sp|Q9LRV9|PP228_ARATH Pentatricopeptide repeat-containing protein At3g13880 OS=Arabidopsis thaliana GN=PCMP-E89 PE=2 SV=1//1.3794e-16
Chr1	42310920	42311192	273	Promoter (<=1kb)	42303454	42311177	7724	-	LOC_Os01g72940	0	sp|Q5JN42|PSD2_ORYSJ Phosphatidylserine decarboxylase proenzyme 2 OS=Oryza sativa subsp. japonica GN=PSD2 PE=3 SV=2//0
Chr1	42312260	42312538	279	Promoter (<=1kb)	42312149	42313577	1429	+	LOC_Os01g72950	111	sp|Q9S829|NDHO_ARATH NAD(P)H-quinone oxidoreductase subunit O, chloroplastic OS=Arabidopsis thaliana GN=ndhO PE=2 SV=1//1.18852e-47
Chr1	42315279	42315474	196	Promoter (<=1kb)	42315264	42317679	2416	+	LOC_Os01g72960	15	sp|Q9FY84|PEN2_ARATH Probable gamma-secretase subunit PEN-2 OS=Arabidopsis thaliana GN=At5g09310 PE=2 SV=1//1.2794e-35
Chr1	42451165	42451365	201	Promoter (<=1kb)	42451123	42454309	3187	+	LOC_Os01g73234	42	sp|Q5JMR9|TRXY_ORYSJ Thioredoxin Y, chloroplastic OS=Oryza sativa subsp. japonica GN=Os01g0963400 PE=3 SV=2//3.82572e-77
Chr1	42489739	42490281	543	Promoter (2-3kb)	42484073	42487451	3379	-	LOC_Os01g73310	-2288	sp|P30171|ACT11_SOLTU Actin-97 OS=Solanum tuberosum GN=AC97 PE=3 SV=1//0
Chr1	42505069	42505534	466	Distal Intergenic	42511013	42517180	6168	+	LOC_Os01g73344	-5479	sp|P0CT39|TF26_SCHPO Transposon Tf2-6 polyprotein OS=Schizosaccharomyces pombe (strain 972 / ATCC 24843) GN=Tf2-6 PE=3 SV=1//1.57877e-152
Chr1	42547791	42547986	196	Promoter (<=1kb)	42547599	42548991	1393	+	LOC_Os01g73420	192	sp|Q9FHX2|MFL1_ARATH Protein MITOFERRINLIKE 1, chloroplastic OS=Arabidopsis thaliana GN=MFL1 PE=2 SV=1//1.5693e-100
Chr1	42560531	42561094	564	Promoter (1-2kb)	42559048	42559953	906	+	LOC_Os01g73440	1483	sp|Q8RWZ5|SD25_ARATH G-type lectin S-receptor-like serine/threonine-protein kinase SD2-5 OS=Arabidopsis thaliana GN=SD25 PE=1 SV=1//1.28136e-06
Chr1	42727596	42727993	398	Promoter (<=1kb)	42727426	42728363	938	+	LOC_Os01g73770	170	sp|Q8S9Z5|DRE1F_ORYSJ Dehydration-responsive element-binding protein 1F OS=Oryza sativa subsp. japonica GN=DREB1F PE=3 SV=1//1.25056e-90
Chr1	42824816	42825068	253	Promoter (<=1kb)	42821164	42825125	3962	-	LOC_Os01g73900	57	sp|Q0JFN7|RH58_ORYSJ DEAD-box ATP-dependent RNA helicase 58, chloroplastic OS=Oryza sativa subsp. japonica GN=Os01g0970600 PE=2 SV=2//0
Chr1	43242365	43242731	367	Promoter (1-2kb)	43244186	43245432	1247	+	LOC_Os01g74660	-1455	sp|Q9S9N9|CCR1_ARATH Cinnamoyl-CoA reductase 1 OS=Arabidopsis thaliana GN=CCR1 PE=1 SV=1//8.9551e-31
Chr10	268448	268784	337	Promoter (<=1kb)	268697	272855	4159	+	LOC_Os10g01450	0	sp|P10978|POLX_TOBAC Retrovirus-related Pol polyprotein from transposon TNT 1-94 OS=Nicotiana tabacum PE=2 SV=1//6.36076e-92
Chr10	1124196	1124641	446	Promoter (2-3kb)	1126728	1130428	3701	+	LOC_Os10g02814	-2087	sp|Q9C516|XLG3_ARATH Extra-large guanine nucleotide-binding protein 3 OS=Arabidopsis thaliana GN=XLG3 PE=1 SV=1//1.49159e-121
Chr10	1222140	1222337	198	Promoter (<=1kb)	1217529	1222203	4675	-	LOC_Os10g02960	0	sp|P10978|POLX_TOBAC Retrovirus-related Pol polyprotein from transposon TNT 1-94 OS=Nicotiana tabacum PE=2 SV=1//0
Chr10	1355716	1356348	633	Promoter (<=1kb)	1355438	1356507	1070	+	LOC_Os10g03210	278	sp|Q93ZT5|EDL3_ARATH EID1-like F-box protein 3 OS=Arabidopsis thaliana GN=EDL3 PE=2 SV=1//3.41181e-07
Chr10	1405733	1406088	356	Promoter (<=1kb)	1405706	1407215	1510	+	LOC_Os10g03320	27	sp|Q66PF2|URT1_FRAAN Putative UDP-rhamnose:rhamnosyltransferase 1 OS=Fragaria ananassa GN=GT4 PE=2 SV=1//3.85873e-79
Chr10	1526243	1526584	342	Promoter (<=1kb)	1525512	1526294	783	-	LOC_Os10g03530	0	sp|Q9FMS6|CAF1K_ARATH Probable CCR4-associated factor 1 homolog 11 OS=Arabidopsis thaliana GN=CAF1-11 PE=2 SV=1//3.55069e-43
Chr10	1670417	1670620	204	Promoter (<=1kb)	1660771	1671354	10584	-	LOC_Os10g03700	734	sp|B0BN95|HARB1_RAT Putative nuclease HARBI1 OS=Rattus norvegicus GN=Harbi1 PE=2 SV=1//5.88099e-09
Chr10	1671045	1671392	348	Promoter (<=1kb)	1660771	1671354	10584	-	LOC_Os10g03700	0	sp|B0BN95|HARB1_RAT Putative nuclease HARBI1 OS=Rattus norvegicus GN=Harbi1 PE=2 SV=1//5.88099e-09
Chr10	1677454	1677754	301	Promoter (<=1kb)	1678019	1678480	462	+	LOC_Os10g03720	-265	sp|Q8GXW6|FBL59_ARATH F-box/LRR-repeat protein At3g58930 OS=Arabidopsis thaliana GN=At3g58930 PE=2 SV=1//1.2293e-12
Chr10	1836183	1836543	361	Promoter (1-2kb)	1833204	1834781	1578	-	LOC_Os10g04010	-1402	sp|Q9FZ36|M3K2_ARATH Mitogen-activated protein kinase kinase kinase 2 OS=Arabidopsis thaliana GN=ANP2 PE=2 SV=1//3.1847e-52
Chr10	2592077	2592362	286	Promoter (<=1kb)	2591413	2596634	5222	+	LOC_Os10g05250	664	sp|Q9S9M2|WAKLD_ARATH Wall-associated receptor kinase-like 4 OS=Arabidopsis thaliana GN=WAKL4 PE=2 SV=2//1.68088e-38
Chr10	2829243	2829638	396	Promoter (<=1kb)	2829151	2830798	1648	+	LOC_Os10g05660	92	sp|Q9FSG7|TP1A_MALDO Thaumatin-like protein 1a OS=Malus domestica GN=TL1 PE=1 SV=1//7.18501e-77
Chr10	2971497	2972088	592	Promoter (<=1kb)	2970812	2972478	1667	-	LOC_Os10g05890	390	sp|Q7XDY9|RAF1_ORYSJ Rubisco accumulation factor 1, chloroplastic OS=Oryza sativa subsp. japonica GN=RAF1 PE=2 SV=1//2.16186e-08
Chr10	3244616	3244896	281	Promoter (<=1kb)	3245442	3253802	8361	+	LOC_Os10g06310	-546	sp|P04323|POL3_DROME Retrovirus-related Pol polyprotein from transposon 17.6 OS=Drosophila melanogaster GN=pol PE=3 SV=1//2.58851e-76
Chr10	3354068	3354318	251	Promoter (<=1kb)	3344703	3353280	8578	-	LOC_Os10g06520	-788	sp|P0CT39|TF26_SCHPO Transposon Tf2-6 polyprotein OS=Schizosaccharomyces pombe (strain 972 / ATCC 24843) GN=Tf2-6 PE=3 SV=1//1.53446e-109
Chr10	3458878	3459073	196	Promoter (<=1kb)	3459159	3460397	1239	+	LOC_Os10g06670	-86	sp|Q9SVC6|PUB22_ARATH E3 ubiquitin-protein ligase PUB22 OS=Arabidopsis thaliana GN=PUB22 PE=1 SV=1//1.94758e-10
Chr10	3459716	3459926	211	Promoter (<=1kb)	3459159	3460397	1239	+	LOC_Os10g06670	557	sp|Q9SVC6|PUB22_ARATH E3 ubiquitin-protein ligase PUB22 OS=Arabidopsis thaliana GN=PUB22 PE=1 SV=1//1.94758e-10
Chr10	3515016	3515294	279	Promoter (<=1kb)	3514904	3518648	3745	+	LOC_Os10g06760	112	sp|Q9FZ59|PEPR2_ARATH Leucine-rich repeat receptor-like protein kinase PEPR2 OS=Arabidopsis thaliana GN=PEPR2 PE=1 SV=1//2.83952e-36
Chr10	4288423	4288618	196	Promoter (1-2kb)	4281000	4286574	5575	-	LOC_Os10g07994	-1849	sp|Q54NA3|ATG9_DICDI Autophagy-related protein 9 OS=Dictyostelium discoideum GN=atg9 PE=2 SV=1//8.28294e-81
Chr10	4366979	4367248	270	Promoter (<=1kb)	4367450	4367910	461	-	LOC_Os10g08050	662	sp|Q10PI6|LCAT1_ORYSJ Lecithin-cholesterol acyltransferase-like 1 OS=Oryza sativa subsp. japonica GN=Os03g0232800 PE=2 SV=1//1.38363e-15
Chr10	4446711	4447172	462	Promoter (1-2kb)	4445399	4447296	1898	+	LOC_Os10g08230	1312	sp|Q8VWZ7|C76B6_CATRO Geraniol 8-hydroxylase OS=Catharanthus roseus GN=CYP76B6 PE=1 SV=1//3.99133e-54
Chr10	4857374	4857569	196	Promoter (<=1kb)	4857120	4859975	2856	+	LOC_Os10g08980	254	sp|Q84K96|ZCD_CROSA Zeaxanthin 7,8(7&apos;,8&apos;)-cleavage dioxygenase, chromoplast OS=Crocus sativus GN=ZCD PE=1 SV=1//9.94501e-56
Chr10	4916734	4917359	626	Promoter (<=1kb)	4914321	4917390	3070	-	LOC_Os10g09090	31	sp|O64637|C76C2_ARATH Cytochrome P450 76C2 OS=Arabidopsis thaliana GN=CYP76C2 PE=2 SV=1//2.57735e-63
Chr10	5172787	5173091	305	Distal Intergenic	5163445	5164933	1489	-	LOC_Os10g09570	-7854	sp|Q39191|WAK1_ARATH Wall-associated receptor kinase 1 OS=Arabidopsis thaliana GN=WAK1 PE=1 SV=2//8.64946e-25
Chr10	5247865	5248060	196	Promoter (<=1kb)	5247432	5247913	482	+	LOC_Os10g09710	433	sp|F4HZQ7|WTR5_ARATH WAT1-related protein At1g21890 OS=Arabidopsis thaliana GN=At1g21890 PE=2 SV=1//2.5801e-31
Chr10	5496628	5497003	376	Distal Intergenic	5487008	5490456	3449	-	LOC_Os10g10080	-6172	sp|Q33AH8|GT101_ORYSJ Probable glucuronosyltransferase GUT1 OS=Oryza sativa subsp. japonica GN=GUT1 PE=2 SV=2//0
Chr10	5591952	5592147	196	Promoter (<=1kb)	5592902	5595707	2806	+	LOC_Os10g10180	-755	sp|A4F7P5|ERYG_SACEN Erythromycin 3&apos;&apos;-O-methyltransferase OS=Saccharopolyspora erythraea (strain NRRL 23338) GN=eryG PE=1 SV=1//4.46335e-10
Chr10	5593012	5593207	196	Promoter (<=1kb)	5592902	5595707	2806	+	LOC_Os10g10180	110	sp|A4F7P5|ERYG_SACEN Erythromycin 3&apos;&apos;-O-methyltransferase OS=Saccharopolyspora erythraea (strain NRRL 23338) GN=eryG PE=1 SV=1//4.46335e-10
Chr10	5704601	5704828	228	Promoter (<=1kb)	5704097	5709959	5863	+	LOC_Os10g10380	504	sp|P10978|POLX_TOBAC Retrovirus-related Pol polyprotein from transposon TNT 1-94 OS=Nicotiana tabacum PE=2 SV=1//8.8817e-25
Chr10	5916715	5917039	325	Promoter (<=1kb)	5916507	5921052	4546	+	LOC_Os10g10720	208	sp|O64637|C76C2_ARATH Cytochrome P450 76C2 OS=Arabidopsis thaliana GN=CYP76C2 PE=2 SV=1//5.8602e-76
Chr10	6064764	6064959	196	Promoter (<=1kb)	6065919	6068099	2181	+	LOC_Os10g10970	-960	sp|P08770|TRA1_MAIZE Putative AC transposase OS=Zea mays PE=2 SV=2//9.08513e-15
Chr10	6143930	6144230	301	Promoter (<=1kb)	6144589	6150509	5921	+	LOC_Os10g11110	-359	sp|Q4PJX1|ODR4_MOUSE Protein odr-4 homolog OS=Mus musculus GN=Odr4 PE=2 SV=2//5.26729e-20
Chr10	6284069	6284292	224	Promoter (1-2kb)	6282966	6283511	546	+	LOC_Os10g11320	1103	sp|Q9SF38|PP222_ARATH Pentatricopeptide repeat-containing protein At3g09650, chloroplastic OS=Arabidopsis thaliana GN=HCF152 PE=2 SV=1//9.69008e-07
Chr10	6623484	6623713	230	Promoter (<=1kb)	6624031	6632180	8150	+	LOC_Os10g11954	-318	sp|P04323|POL3_DROME Retrovirus-related Pol polyprotein from transposon 17.6 OS=Drosophila melanogaster GN=pol PE=3 SV=1//7.20703e-38
Chr10	6965111	6965593	483	Promoter (1-2kb)	6962435	6963271	837	-	LOC_Os10g12520	-1840	sp|Q9UR07|TF211_SCHPO Transposon Tf2-11 polyprotein OS=Schizosaccharomyces pombe (strain 972 / ATCC 24843) GN=Tf2-11 PE=3 SV=1//1.25208e-22
Chr10	6965111	6965593	483	Promoter (1-2kb)	6962435	6963271	837	-	LOC_Os10g12520	-1840	sp|Q9UR07|TF211_SCHPO Transposon Tf2-11 polyprotein OS=Schizosaccharomyces pombe (strain 972 / ATCC 24843) GN=Tf2-11 PE=3 SV=1//1.25208e-22
Chr10	6973421	6973616	196	Promoter (1-2kb)	6966607	6972101	5495	-	LOC_Os10g12530	-1320	sp|P20825|POL2_DROME Retrovirus-related Pol polyprotein from transposon 297 OS=Drosophila melanogaster GN=pol PE=3 SV=1//5.42734e-82
Chr10	7215031	7215410	380	Promoter (1-2kb)	7213705	7214358	654	+	LOC_Os10g13360	1326	sp|P0CT40|TF29_SCHPO Transposon Tf2-9 polyprotein OS=Schizosaccharomyces pombe (strain 972 / ATCC 24843) GN=Tf2-9 PE=3 SV=1//1.48207e-06
Chr10	7502779	7503015	237	Promoter (<=1kb)	7499315	7503453	4139	-	LOC_Os10g13810	438	sp|Q8S626|GT102_ORYSJ Probable glucuronosyltransferase Os10g0205300 OS=Oryza sativa subsp. japonica GN=Os10g0205300 PE=2 SV=1//0
Chr10	7805543	7805738	196	Distal Intergenic	7797241	7797648	408	-	LOC_Os10g14900	-7895	sp|P10978|POLX_TOBAC Retrovirus-related Pol polyprotein from transposon TNT 1-94 OS=Nicotiana tabacum PE=2 SV=1//1.76621e-12
Chr10	8627998	8628193	196	Promoter (<=1kb)	8621790	8627281	5492	-	LOC_Os10g17170	-717	sp|P20825|POL2_DROME Retrovirus-related Pol polyprotein from transposon 297 OS=Drosophila melanogaster GN=pol PE=3 SV=1//2.2837e-78
Chr10	8753727	8753939	213	Promoter (<=1kb)	8753075	8757744	4670	+	LOC_Os10g17370	652	sp|Q99315|YG31B_YEAST Transposon Ty3-G Gag-Pol polyprotein OS=Saccharomyces cerevisiae (strain ATCC 204508 / S288c) GN=TY3B-G PE=1 SV=3//3.51827e-62
Chr10	8812969	8813164	196	Promoter (2-3kb)	8815242	8827699	12458	+	LOC_Os10g17489	-2078	sp|Q9SGA8|U83A1_ARATH UDP-glycosyltransferase 83A1 OS=Arabidopsis thaliana GN=UGT83A1 PE=2 SV=1//2.16427e-77
Chr10	9104527	9104818	292	Promoter (<=1kb)	9101768	9104973	3206	-	LOC_Os10g17960	155	sp|Q8GYA4|CRK10_ARATH Cysteine-rich receptor-like protein kinase 10 OS=Arabidopsis thaliana GN=CRK10 PE=1 SV=3//1.00022e-139
Chr10	9416276	9416471	196	Promoter (<=1kb)	9412117	9416653	4537	-	LOC_Os10g18560	182	sp|P0CT40|TF29_SCHPO Transposon Tf2-9 polyprotein OS=Schizosaccharomyces pombe (strain 972 / ATCC 24843) GN=Tf2-9 PE=3 SV=1//8.09778e-44
Chr10	9463221	9463558	338	Intron (LOC_Os10g18660.1/LOC_Os10g18660, intron 4 of 6)	9455364	9459785	4422	-	LOC_Os10g18650	-3436	sp|P0CT40|TF29_SCHPO Transposon Tf2-9 polyprotein OS=Schizosaccharomyces pombe (strain 972 / ATCC 24843) GN=Tf2-9 PE=3 SV=1//1.02831e-147
Chr10	9897910	9898260	351	Promoter (<=1kb)	9895838	9897297	1460	-	LOC_Os10g19850	-613	sp|O80653|SKIP_ARATH SNW/SKI-interacting protein OS=Arabidopsis thaliana GN=SKIP PE=1 SV=1//6.1969e-15
Chr10	10418263	10418501	239	Promoter (<=1kb)	10411144	10418511	7368	-	LOC_Os10g20630	10	sp|O80977|VSR3_ARATH Vacuolar-sorting receptor 3 OS=Arabidopsis thaliana GN=VSR3 PE=2 SV=1//0
Chr10	10469006	10469201	196	Promoter (<=1kb)	10468913	10469682	770	+	LOC_Os10g20690	93	sp|Q2QM77|PID_ORYSJ Protein kinase PINOID OS=Oryza sativa subsp. japonica GN=PID PE=2 SV=1//6.76825e-19
Chr10	10485308	10485683	376	Promoter (<=1kb)	10482035	10485936	3902	-	LOC_Os10g20710	253	sp|Q8H8K7|FH4_ORYSJ Formin-like protein 4 OS=Oryza sativa subsp. japonica GN=FH4 PE=3 SV=1//0
Chr10	10628479	10628850	372	Promoter (1-2kb)	10625908	10630239	4332	-	LOC_Os10g20990	1389	sp|Q9M5Z9|RS23_EUPES 40S ribosomal protein S23 OS=Euphorbia esula GN=RPS23 PE=2 SV=1//3.07996e-52
Chr10	10641289	10641574	286	Promoter (<=1kb)	10637369	10641992	4624	-	LOC_Os10g21000	418	sp|F4JSH1|APY7_ARATH Probable apyrase 7 OS=Arabidopsis thaliana GN=APY7 PE=2 SV=1//0
Chr10	11027147	11027342	196	Promoter (<=1kb)	11026550	11029493	2944	+	LOC_Os10g21540	597	sp|Q7XFE1|U496E_ORYSJ Putative UPF0496 protein 5 OS=Oryza sativa subsp. japonica GN=Os10g0359200 PE=3 SV=2//0
Chr10	11098630	11098860	231	Promoter (<=1kb)	11093869	11098028	4160	-	LOC_Os10g21660	-602	sp|C0LGT6|EFR_ARATH LRR receptor-like serine/threonine-protein kinase EFR OS=Arabidopsis thaliana GN=EFR PE=1 SV=1//7.65918e-62
Chr10	11187046	11187268	223	Promoter (<=1kb)	11186975	11188483	1509	+	LOC_Os10g21800	71	sp|C0LGT6|EFR_ARATH LRR receptor-like serine/threonine-protein kinase EFR OS=Arabidopsis thaliana GN=EFR PE=1 SV=1//3.30648e-08
Chr10	11289092	11289287	196	Promoter (<=1kb)	11289218	11290756	1539	+	LOC_Os10g21920	0	sp|Q9SZ10|PP338_ARATH Pentatricopeptide repeat-containing protein At4g26680, mitochondrial OS=Arabidopsis thaliana GN=At4g26680 PE=2 SV=1//2.6099e-99
Chr10	11421796	11422127	332	Promoter (<=1kb)	11418712	11421321	2610	-	LOC_Os10g22110	-475	sp|Q8H8N3|TYW1_ORYSJ S-adenosyl-L-methionine-dependent tRNA 4-demethylwyosine synthase OS=Oryza sativa subsp. japonica GN=TYW1 PE=2 SV=1//4.53244e-28
Chr10	11432302	11432578	277	Promoter (<=1kb)	11427731	11432896	5166	-	LOC_Os10g22130	318	sp|Q7ZV90|PIF1_DANRE ATP-dependent DNA helicase PIF1 OS=Danio rerio GN=pif1 PE=2 SV=1//3.85035e-08
Chr10	11432920	11433134	215	Promoter (<=1kb)	11427731	11432896	5166	-	LOC_Os10g22130	-24	sp|Q7ZV90|PIF1_DANRE ATP-dependent DNA helicase PIF1 OS=Danio rerio GN=pif1 PE=2 SV=1//3.85035e-08
Chr10	11731877	11732278	402	Promoter (<=1kb)	11731592	11732917	1326	+	LOC_Os10g22600	285	sp|Q9LM15|RA213_ARATH Ethylene-responsive transcription factor RAP2-13 OS=Arabidopsis thaliana GN=RAP2-13 PE=1 SV=1//2.22718e-26
Chr10	11886032	11886458	427	Promoter (<=1kb)	11879635	11885484	5850	-	LOC_Os10g22869	-548	sp|C0LGP4|Y3475_ARATH Probable LRR receptor-like serine/threonine-protein kinase At3g47570 OS=Arabidopsis thaliana GN=At3g47570 PE=2 SV=1//6.25776e-14
Chr10	11983235	11983555	321	Promoter (1-2kb)	11982185	11986090	3906	+	LOC_Os10g22980	1050	sp|Q6AYH9|DAAF1_RAT Dynein assembly factor 1, axonemal OS=Rattus norvegicus GN=Dnaaf1 PE=2 SV=1//7.42315e-16
Chr10	11987099	11987294	196	Promoter (2-3kb)	11989589	11990593	1005	+	LOC_Os10g22990	-2295	sp|Q9ZPE7|EXO_ARATH Protein EXORDIUM OS=Arabidopsis thaliana GN=EXO PE=2 SV=1//2.31227e-50
Chr10	11989668	11990390	723	Promoter (<=1kb)	11989589	11990593	1005	+	LOC_Os10g22990	79	sp|Q9ZPE7|EXO_ARATH Protein EXORDIUM OS=Arabidopsis thaliana GN=EXO PE=2 SV=1//2.31227e-50
Chr10	12213234	12213429	196	Promoter (1-2kb)	12214879	12216579	1701	+	LOC_Os10g23820	-1450	sp|A9ZPJ6|AGCT1_HORVU Agmatine coumaroyltransferase-1 OS=Hordeum vulgare GN=ACT-1 PE=1 SV=1//3.80455e-78
Chr10	12388623	12388922	300	Promoter (<=1kb)	12389203	12394769	5567	+	LOC_Os10g24190	-281	sp|Q7LHG5|YI31B_YEAST Transposon Ty3-I Gag-Pol polyprotein OS=Saccharomyces cerevisiae (strain ATCC 204508 / S288c) GN=TY3B-I PE=3 SV=2//1.11038e-11
Chr10	12544927	12545122	196	Promoter (<=1kb)	12538741	12545374	6634	-	LOC_Os10g24450	252	sp|Q99315|YG31B_YEAST Transposon Ty3-G Gag-Pol polyprotein OS=Saccharomyces cerevisiae (strain ATCC 204508 / S288c) GN=TY3B-G PE=1 SV=3//1.30158e-07
Chr10	12545921	12546166	246	Promoter (<=1kb)	12538741	12545374	6634	-	LOC_Os10g24450	-547	sp|Q99315|YG31B_YEAST Transposon Ty3-G Gag-Pol polyprotein OS=Saccharomyces cerevisiae (strain ATCC 204508 / S288c) GN=TY3B-G PE=1 SV=3//1.30158e-07
Chr10	12631539	12631867	329	Promoter (2-3kb)	12633994	12639712	5719	+	LOC_Os10g24620	-2127	sp|P0CT39|TF26_SCHPO Transposon Tf2-6 polyprotein OS=Schizosaccharomyces pombe (strain 972 / ATCC 24843) GN=Tf2-6 PE=3 SV=1//1.53906e-105
Chr10	12834394	12834676	283	Promoter (1-2kb)	12835979	12842596	6618	+	LOC_Os10g24940	-1303	sp|Q7ZV90|PIF1_DANRE ATP-dependent DNA helicase PIF1 OS=Danio rerio GN=pif1 PE=2 SV=1//1.00807e-16
Chr10	12880761	12881172	412	Promoter (<=1kb)	12879408	12880295	888	-	LOC_Os10g25020	-466	sp|Q9MTQ6|RCCR_HORVU Red chlorophyll catabolite reductase (Fragment) OS=Hordeum vulgare GN=rccR PE=2 SV=1//7.51096e-49
Chr10	12887873	12888178	306	Promoter (<=1kb)	12886331	12888302	1972	-	LOC_Os10g25030	124	sp|Q9MTQ6|RCCR_HORVU Red chlorophyll catabolite reductase (Fragment) OS=Hordeum vulgare GN=rccR PE=2 SV=1//2.62368e-106
Chr10	12992491	12992807	317	Promoter (<=1kb)	12992049	12993419	1371	+	LOC_Os10g25170	442	sp|O22259|ERF71_ARATH Ethylene-responsive transcription factor ERF071 OS=Arabidopsis thaliana GN=ERF071 PE=2 SV=1//2.92793e-12
Chr10	13017670	13017917	248	Promoter (<=1kb)	13015120	13017947	2828	-	LOC_Os10g25210	30	sp|Q9FT50|FB202_ARATH Putative F-box protein At3g52320 OS=Arabidopsis thaliana GN=At3g52320 PE=3 SV=1//3.75725e-12
Chr10	13132936	13133131	196	Promoter (1-2kb)	13131433	13133328	1896	+	LOC_Os10g25400	1503	sp|Q94F40|GDL9_ARATH GDSL esterase/lipase At1g28600 OS=Arabidopsis thaliana GN=At1g28600 PE=2 SV=1//2.02745e-70
Chr10	13282563	13282915	353	Promoter (1-2kb)	13279353	13280721	1369	-	LOC_Os10g25640	-1842	sp|Q7F2L3|NAC48_ORYSJ NAC domain-containing protein 48 OS=Oryza sativa subsp. japonica GN=NAC48 PE=2 SV=1//3.90907e-08
Chr10	13387673	13388218	546	Promoter (<=1kb)	13387338	13388803	1466	-	LOC_Os10g25830	585	sp|Q5RD67|S2544_PONAB Solute carrier family 25 member 44 OS=Pongo abelii GN=SLC25A44 PE=2 SV=2//9.04778e-20
Chr10	13557754	13557959	206	Promoter (<=1kb)	13557781	13562107	4327	+	LOC_Os10g26164	0	sp|A5D8M0|TYDP2_XENLA Tyrosyl-DNA phosphodiesterase 2 OS=Xenopus laevis GN=tdp2 PE=2 SV=1//6.22151e-09
Chr10	13892727	13892923	197	Distal Intergenic	13882332	13885224	2893	-	LOC_Os10g26620	-7503	sp|Q8W1E3|CDF1_ARATH Cyclic dof factor 1 OS=Arabidopsis thaliana GN=CDF1 PE=1 SV=2//8.70361e-35
Chr10	13920119	13920332	214	Promoter (<=1kb)	13919924	13925643	5720	+	LOC_Os10g26660	195	sp|Q8C3I8|HGH1_MOUSE Protein HGH1 homolog OS=Mus musculus GN=Hgh1 PE=2 SV=1//3.52131e-14
Chr10	14391485	14391997	513	Promoter (<=1kb)	14376053	14392036	15984	-	LOC_Os10g27260	39	sp|P19199|POL_COYMV Polyprotein P3 OS=Commelina yellow mottle virus PE=3 SV=2//4.90242e-83
Chr10	14424250	14424636	387	Promoter (<=1kb)	14424222	14428197	3976	+	LOC_Os10g27330	28	sp|O80437|GPAT6_ARATH Glycerol-3-phosphate 2-O-acyltransferase 6 OS=Arabidopsis thaliana GN=GPAT6 PE=1 SV=1//1.60161e-137
Chr10	14565363	14565565	203	Promoter (<=1kb)	14560601	14565737	5137	-	LOC_Os10g28060	172	sp|Q5XEP9|KCS17_ARATH 3-ketoacyl-CoA synthase 17 OS=Arabidopsis thaliana GN=KCS17 PE=2 SV=2//0
Chr10	14902928	14903331	404	Promoter (1-2kb)	14897142	14900931	3790	-	LOC_Os10g28600	-1997	sp|Q9SZ52|PP344_ARATH Pentatricopeptide repeat-containing protein At4g31850, chloroplastic OS=Arabidopsis thaliana GN=PGR3 PE=1 SV=1//1.46356e-40
Chr10	15089179	15089398	220	Promoter (<=1kb)	15088189	15095154	6966	+	LOC_Os10g28950	990	sp|Q9UR07|TF211_SCHPO Transposon Tf2-11 polyprotein OS=Schizosaccharomyces pombe (strain 972 / ATCC 24843) GN=Tf2-11 PE=3 SV=1//9.95039e-72
Chr10	15151499	15151694	196	Promoter (<=1kb)	15151247	15156225	4979	+	LOC_Os10g29090	252	sp|Q9FLR0|NEN1_ARATH Protein NEN1 OS=Arabidopsis thaliana GN=NEN1 PE=2 SV=1//3.78329e-10
Chr10	15208674	15208869	196	Promoter (<=1kb)	15209260	15210536	1277	+	LOC_Os10g29210	-391	sp|P10978|POLX_TOBAC Retrovirus-related Pol polyprotein from transposon TNT 1-94 OS=Nicotiana tabacum PE=2 SV=1//7.32247e-51
Chr10	15212785	15213237	453	Promoter (<=1kb)	15213679	15215127	1449	+	LOC_Os10g29220	-442	sp|Q8L765|BPM1_ARATH BTB/POZ and MATH domain-containing protein 1 OS=Arabidopsis thaliana GN=BPM1 PE=1 SV=1//9.77268e-70
Chr10	15601430	15601723	294	Promoter (<=1kb)	15601119	15610594	9476	+	LOC_Os10g30054	311	sp|O23207|FQRL2_ARATH Probable NAD(P)H dehydrogenase (quinone) FQR1-like 2 OS=Arabidopsis thaliana GN=At4g36750 PE=1 SV=1//1.54975e-68
Chr10	15689562	15689757	196	Promoter (<=1kb)	15688773	15689850	1078	+	LOC_Os10g30180	789	sp|Q38806|HSP22_ARATH 22.0 kDa heat shock protein OS=Arabidopsis thaliana GN=HSP22.0 PE=2 SV=1//2.39198e-06
Chr10	15692890	15693140	251	Promoter (<=1kb)	15689665	15693104	3440	-	LOC_Os10g30190	0	sp|Q9SE95|FIP2_ARATH FH protein interacting protein FIP2 OS=Arabidopsis thaliana GN=FIP2 PE=1 SV=1//5.10652e-89
Chr10	15895739	15895943	205	Promoter (2-3kb)	15884727	15893608	8882	-	LOC_Os10g30550	-2131	sp|Q9LD57|PGKH1_ARATH Phosphoglycerate kinase 1, chloroplastic OS=Arabidopsis thaliana GN=PGK1 PE=1 SV=1//4.05933e-43
Chr10	15928792	15929041	250	Promoter (<=1kb)	15928796	15936726	7931	+	LOC_Os10g30610	0	sp|Q9FF46|AB28G_ARATH ABC transporter G family member 28 OS=Arabidopsis thaliana GN=ABCG28 PE=3 SV=1//0
Chr10	16201186	16201381	196	Promoter (<=1kb)	16201250	16208251	7002	+	LOC_Os10g31030	0	sp|Q94AI4|METL1_ARATH Methyltransferase-like protein 1 OS=Arabidopsis thaliana GN=EMB1691 PE=2 SV=1//5.40561e-117
Chr10	16371044	16371318	275	Promoter (<=1kb)	16371545	16375844	4300	+	LOC_Os10g31220	-227	sp|P10978|POLX_TOBAC Retrovirus-related Pol polyprotein from transposon TNT 1-94 OS=Nicotiana tabacum PE=2 SV=1//5.85224e-19
Chr10	16742319	16742539	221	Promoter (<=1kb)	16716230	16742534	26305	-	LOC_Os10g31864	0	sp|Q869L3|MDN1_DICDI Midasin OS=Dictyostelium discoideum GN=mdn1 PE=3 SV=2//2.51406e-07
Chr10	16750706	16750901	196	Promoter (<=1kb)	16750745	16755237	4493	+	LOC_Os10g31900	0	sp|Q15427|SF3B4_HUMAN Splicing factor 3B subunit 4 OS=Homo sapiens GN=SF3B4 PE=1 SV=1//1.39013e-06
Chr10	16862343	16862538	196	Promoter (<=1kb)	16861659	16863255	1597	-	LOC_Os10g32110	717	sp|Q8H038|KATAM_ORYSJ Xyloglucan galactosyltransferase KATAMARI1 homolog OS=Oryza sativa subsp. japonica GN=Os03g0144800 PE=2 SV=1//4.55464e-123
Chr10	16898006	16898201	196	Promoter (<=1kb)	16896684	16898801	2118	-	LOC_Os10g32170	600	sp|Q8H038|KATAM_ORYSJ Xyloglucan galactosyltransferase KATAMARI1 homolog OS=Oryza sativa subsp. japonica GN=Os03g0144800 PE=2 SV=1//0
Chr10	17071661	17071856	196	Promoter (<=1kb)	17070918	17072621	1704	+	LOC_Os10g32580	743	sp|Q8LB81|GDL79_ARATH GDSL esterase/lipase At5g33370 OS=Arabidopsis thaliana GN=At5g33370 PE=2 SV=1//2.61216e-159
Chr10	17072034	17072245	212	Promoter (1-2kb)	17070918	17072621	1704	+	LOC_Os10g32580	1116	sp|Q8LB81|GDL79_ARATH GDSL esterase/lipase At5g33370 OS=Arabidopsis thaliana GN=At5g33370 PE=2 SV=1//2.61216e-159
Chr10	17124470	17124700	231	Promoter (<=1kb)	17120230	17124776	4547	-	LOC_Os10g32710	76	sp|Q0VA16|WDR70_XENTR WD repeat-containing protein 70 OS=Xenopus tropicalis GN=wdr70 PE=2 SV=1//5.41984e-135
Chr10	17155716	17156042	327	Promoter (<=1kb)	17152945	17154765	1821	-	LOC_Os10g32750	-951	sp|Q55874|Y103_SYNY3 Uncharacterized protein sll0103 OS=Synechocystis sp. (strain PCC 6803 / Kazusa) GN=sll0103 PE=3 SV=1//1.84711e-14
Chr10	17156962	17157353	392	Promoter (<=1kb)	17155342	17157744	2403	-	LOC_Os10g32760	391	sp|Q55874|Y103_SYNY3 Uncharacterized protein sll0103 OS=Synechocystis sp. (strain PCC 6803 / Kazusa) GN=sll0103 PE=3 SV=1//3.98838e-11
Chr10	17361304	17361592	289	Promoter (<=1kb)	17357738	17361919	4182	-	LOC_Os10g33130	327	sp|Q9LP24|Y1571_ARATH Probable leucine-rich repeat receptor-like protein kinase At1g35710 OS=Arabidopsis thaliana GN=At1g35710 PE=2 SV=1//1.91539e-12
Chr10	17535914	17536121	208	Distal Intergenic	17544741	17547685	2945	+	LOC_Os10g33350	-8620	sp|Q6ICB0|DESI1_HUMAN Desumoylating isopeptidase 1 OS=Homo sapiens GN=DESI1 PE=1 SV=1//9.3924e-31
Chr10	17595720	17595953	234	Distal Intergenic	17584939	17592299	7361	-	LOC_Os10g33420	-3421	sp|Q69ZF3|GBA2_MOUSE Non-lysosomal glucosylceramidase OS=Mus musculus GN=Gba2 PE=1 SV=2//7.13621e-150
Chr10	17716365	17716560	196	Promoter (<=1kb)	17716311	17716544	234	-	LOC_Os10g33600	0	sp|Q6Z4P2|APY2_ORYSJ Probable apyrase 2 OS=Oryza sativa subsp. japonica GN=APY2 PE=2 SV=1//1.43886e-17
Chr10	17716657	17716874	218	Promoter (<=1kb)	17716311	17716544	234	-	LOC_Os10g33600	-113	sp|Q6Z4P2|APY2_ORYSJ Probable apyrase 2 OS=Oryza sativa subsp. japonica GN=APY2 PE=2 SV=1//1.43886e-17
Chr10	17803325	17803765	441	Promoter (<=1kb)	17800146	17803223	3078	-	LOC_Os10g33730	-102	sp|Q7Y211|PP285_ARATH Pentatricopeptide repeat-containing protein At3g57430, chloroplastic OS=Arabidopsis thaliana GN=PCMP-H81 PE=2 SV=2//5.60573e-43
Chr10	17805504	17805889	386	Promoter (2-3kb)	17800146	17803223	3078	-	LOC_Os10g33730	-2281	sp|Q7Y211|PP285_ARATH Pentatricopeptide repeat-containing protein At3g57430, chloroplastic OS=Arabidopsis thaliana GN=PCMP-H81 PE=2 SV=2//5.60573e-43
Chr10	18052281	18052476	196	Promoter (<=1kb)	18051860	18056913	5054	+	LOC_Os10g33940	421	sp|Q9AV47|ARFV_ORYSJ Auxin response factor 22 OS=Oryza sativa subsp. japonica GN=ARF22 PE=2 SV=1//0
Chr10	18257754	18257949	196	Promoter (<=1kb)	18258125	18262552	4428	+	LOC_Os10g34220	-176	sp|C0LGH2|Y1561_ARATH Probable LRR receptor-like serine/threonine-protein kinase At1g56130 OS=Arabidopsis thaliana GN=At1g56130 PE=2 SV=2//1.84529e-91
Chr10	18258107	18258302	196	Promoter (<=1kb)	18258125	18262552	4428	+	LOC_Os10g34220	0	sp|C0LGH2|Y1561_ARATH Probable LRR receptor-like serine/threonine-protein kinase At1g56130 OS=Arabidopsis thaliana GN=At1g56130 PE=2 SV=2//1.84529e-91
Chr10	18290008	18290203	196	Promoter (<=1kb)	18290636	18294176	3541	+	LOC_Os10g34290	-433	sp|P10978|POLX_TOBAC Retrovirus-related Pol polyprotein from transposon TNT 1-94 OS=Nicotiana tabacum PE=2 SV=1//2.02272e-94
Chr10	18343100	18343551	452	Promoter (<=1kb)	18343006	18352029	9024	+	LOC_Os10g34400	94	sp|Q7XD99|EXEC1_ORYSJ Protein EXECUTER 1, chloroplastic OS=Oryza sativa subsp. japonica GN=EX1 PE=2 SV=1//0
Chr10	18394031	18394271	241	Promoter (<=1kb)	18389977	18394398	4422	-	LOC_Os10g34480	127	sp|Q9FMY1|C86B1_ARATH Cytochrome P450 86B1 OS=Arabidopsis thaliana GN=CYP86B1 PE=2 SV=1//0
Chr10	18421822	18422087	266	Promoter (1-2kb)	18420713	18425433	4721	+	LOC_Os10g34540	1109	sp|Q99614|TTC1_HUMAN Tetratricopeptide repeat protein 1 OS=Homo sapiens GN=TTC1 PE=1 SV=1//1.80194e-35
Chr10	18561238	18561433	196	Promoter (<=1kb)	18560932	18561435	504	-	LOC_Os10g34760	2	sp|Q7XD66|RIP6_ORYSJ Putative ripening-related protein 6 OS=Oryza sativa subsp. japonica GN=Os10g0489301 PE=3 SV=1//2.87997e-78
Chr10	18565029	18565227	199	Promoter (<=1kb)	18564998	18565486	489	-	LOC_Os10g34770	259	sp|Q7XD65|RIP7_ORYSJ Putative ripening-related protein 7 OS=Oryza sativa subsp. japonica GN=Os10g0489400 PE=3 SV=1//6.12861e-74
Chr10	18590488	18590730	243	Promoter (<=1kb)	18588276	18590981	2706	-	LOC_Os10g34810	251	sp|Q5BKL1|CG025_XENTR UPF0415 protein C7orf25 homolog OS=Xenopus tropicalis GN=TGas015c11.1 PE=2 SV=1//5.00918e-26
Chr10	18621223	18621448	226	Promoter (<=1kb)	18613368	18621316	7949	-	LOC_Os10g34884	0	sp|Q9SZL8|FRS5_ARATH Protein FAR1-RELATED SEQUENCE 5 OS=Arabidopsis thaliana GN=FRS5 PE=2 SV=1//5.64097e-82
Chr10	18678318	18678706	389	Promoter (<=1kb)	18669977	18678815	8839	-	LOC_Os10g35010	109	sp|Q8LPR9|TI110_ARATH Protein TIC110, chloroplastic OS=Arabidopsis thaliana GN=TIC110 PE=1 SV=1//0
Chr10	18692842	18693209	368	Promoter (<=1kb)	18687523	18693653	6131	-	LOC_Os10g35030	444	sp|O24303|TI110_PEA Protein TIC110, chloroplastic OS=Pisum sativum GN=TIC110 PE=1 SV=1//2.79117e-95
Chr10	18733424	18733703	280	Promoter (<=1kb)	18733290	18741383	8094	+	LOC_Os10g35110	134	sp|Q9FXT4|AGAL_ORYSJ Alpha-galactosidase OS=Oryza sativa subsp. japonica GN=Os10g0493600 PE=1 SV=1//0
Chr10	18750710	18751010	301	Promoter (<=1kb)	18751395	18754005	2611	+	LOC_Os10g35140	-385	sp|Q93V85|WTR16_ARATH WAT1-related protein At3g02690, chloroplastic OS=Arabidopsis thaliana GN=At3g02690 PE=2 SV=1//1.68914e-80
Chr10	18751310	18751505	196	Promoter (<=1kb)	18751395	18754005	2611	+	LOC_Os10g35140	0	sp|Q93V85|WTR16_ARATH WAT1-related protein At3g02690, chloroplastic OS=Arabidopsis thaliana GN=At3g02690 PE=2 SV=1//1.68914e-80
Chr10	18848331	18848547	217	Promoter (<=1kb)	18846830	18849084	2255	-	LOC_Os10g35260	537	sp|Q76C99|RF1_ORYSI Protein Rf1, mitochondrial OS=Oryza sativa subsp. indica GN=Rf1 PE=2 SV=1//8.47318e-32
Chr10	18883554	18883768	215	Promoter (<=1kb)	18883384	18884061	678	-	LOC_Os10g35320	293	sp|Q949X9|LPR2_ARATH Multicopper oxidase LPR2 OS=Arabidopsis thaliana GN=LPR2 PE=2 SV=1//2.01022e-13
Chr10	18883928	18884169	242	Promoter (<=1kb)	18883384	18884061	678	-	LOC_Os10g35320	0	sp|Q949X9|LPR2_ARATH Multicopper oxidase LPR2 OS=Arabidopsis thaliana GN=LPR2 PE=2 SV=1//2.01022e-13
Chr10	19013684	19014045	362	Promoter (<=1kb)	19009680	19014274	4595	-	LOC_Os10g35550	229	sp|Q9ZT71|STA1_ARATH Protein STABILIZED1 OS=Arabidopsis thaliana GN=STA1 PE=1 SV=1//0
Chr10	19053836	19054131	296	Promoter (<=1kb)	19053652	19056108	2457	+	LOC_Os10g35630	184	sp|Q84WQ5|CBSX5_ARATH CBS domain-containing protein CBSX5 OS=Arabidopsis thaliana GN=CBSX5 PE=2 SV=2//1.9071e-33
Chr10	19057021	19057297	277	Promoter (<=1kb)	19056887	19059683	2797	+	LOC_Os10g35640	134	sp|Q76C99|RF1_ORYSI Protein Rf1, mitochondrial OS=Oryza sativa subsp. indica GN=Rf1 PE=2 SV=1//9.72363e-11
Chr10	19130042	19130452	411	Promoter (<=1kb)	19129876	19133641	3766	+	LOC_Os10g35770	166	sp|O64823|MCU2_ARATH Calcium uniporter protein 2, mitochondrial OS=Arabidopsis thaliana GN=At2g23790 PE=2 SV=1//2.56781e-11
Chr10	19150544	19150964	421	Promoter (<=1kb)	19147616	19150913	3298	-	LOC_Os10g35810	0	sp|P81760|TL17_ARATH Thylakoid lumenal 17.4 kDa protein, chloroplastic OS=Arabidopsis thaliana GN=At5g53490 PE=1 SV=2//8.6692e-86
Chr10	19161960	19162167	208	Promoter (<=1kb)	19159093	19162504	3412	-	LOC_Os10g35840	337	sp|P0C587|HEM1_ORYSJ Glutamyl-tRNA reductase, chloroplastic OS=Oryza sativa subsp. japonica GN=Os10g0502400 PE=2 SV=1//0
Chr10	19214164	19214441	278	Promoter (<=1kb)	19213622	19216326	2705	+	LOC_Os10g35950	542	sp|Q8GT20|BEBT_TOBAC Benzyl alcohol O-benzoyltransferase OS=Nicotiana tabacum GN=HSR201 PE=1 SV=1//8.56285e-176
Chr10	19218739	19219029	291	Promoter (<=1kb)	19218567	19224021	5455	+	LOC_Os10g35960	172	sp|P37225|MAON_SOLTU NAD-dependent malic enzyme 59 kDa isoform, mitochondrial OS=Solanum tuberosum PE=1 SV=1//0
Chr10	19258554	19258749	196	Promoter (<=1kb)	19255873	19258067	2195	-	LOC_Os10g36030	-487	sp|A3A9H6|ACET1_ORYSJ Probable ascorbate-specific transmembrane electron transporter 1 OS=Oryza sativa subsp. japonica GN=Os02g0642300 PE=3 SV=1//6.66531e-84
Chr10	19448795	19448998	204	Promoter (<=1kb)	19449703	19454527	4825	+	LOC_Os10g36390	-705	sp|Q9SU40|SKU5_ARATH Monocopper oxidase-like protein SKU5 OS=Arabidopsis thaliana GN=SKU5 PE=1 SV=1//0
Chr10	19449645	19449840	196	Promoter (<=1kb)	19449703	19454527	4825	+	LOC_Os10g36390	0	sp|Q9SU40|SKU5_ARATH Monocopper oxidase-like protein SKU5 OS=Arabidopsis thaliana GN=SKU5 PE=1 SV=1//0
Chr10	19488941	19489458	518	Promoter (<=1kb)	19489666	19496101	6436	+	LOC_Os10g36430	-208	sp|Q7LHG5|YI31B_YEAST Transposon Ty3-I Gag-Pol polyprotein OS=Saccharomyces cerevisiae (strain ATCC 204508 / S288c) GN=TY3B-I PE=3 SV=2//5.172e-42
Chr10	19734337	19734675	339	Promoter (<=1kb)	19728254	19735041	6788	-	LOC_Os10g36848	366	sp|Q42600|C84A1_ARATH Cytochrome P450 84A1 OS=Arabidopsis thaliana GN=CYP84A1 PE=1 SV=1//0
Chr10	19826925	19827368	444	Promoter (<=1kb)	19826811	19828235	1425	+	LOC_Os10g37020	114	sp|Q42602|C89A2_ARATH Cytochrome P450 89A2 OS=Arabidopsis thaliana GN=CYP89A2 PE=2 SV=2//2.97793e-102
Chr10	19838227	19838422	196	Promoter (<=1kb)	19837812	19839400	1589	+	LOC_Os10g37050	415	sp|Q42602|C89A2_ARATH Cytochrome P450 89A2 OS=Arabidopsis thaliana GN=CYP89A2 PE=2 SV=2//2.25092e-140
Chr10	19881633	19881844	212	Promoter (<=1kb)	19881378	19883255	1878	+	LOC_Os10g37160	255	sp|Q42602|C89A2_ARATH Cytochrome P450 89A2 OS=Arabidopsis thaliana GN=CYP89A2 PE=2 SV=2//1.66738e-148
Chr10	19929961	19930267	307	Promoter (<=1kb)	19928995	19931204	2210	-	LOC_Os10g37240	937	sp|Q39117|TGT2_ARATH Trihelix transcription factor GT-2 OS=Arabidopsis thaliana GN=GT-2 PE=2 SV=1//3.88832e-08
Chr10	19997791	19998097	307	Promoter (<=1kb)	19997769	20001957	4189	+	LOC_Os10g37330	22	sp|Q56Y42|PLR1_ARATH Pyridoxal reductase, chloroplastic OS=Arabidopsis thaliana GN=PLR1 PE=1 SV=1//0
Chr10	20055675	20055941	267	Promoter (<=1kb)	20051075	20055448	4374	-	LOC_Os10g37468	-227	sp|P10978|POLX_TOBAC Retrovirus-related Pol polyprotein from transposon TNT 1-94 OS=Nicotiana tabacum PE=2 SV=1//0
Chr10	20082193	20082483	291	Promoter (1-2kb)	20081776	20083719	1944	-	LOC_Os10g37500	1236	sp|Q9P6Q3|BCS1_SCHPO Probable mitochondrial chaperone bcs1 OS=Schizosaccharomyces pombe (strain 972 / ATCC 24843) GN=SPAC644.07 PE=2 SV=1//2.05335e-18
Chr10	20083197	20083392	196	Promoter (<=1kb)	20081776	20083719	1944	-	LOC_Os10g37500	327	sp|Q9P6Q3|BCS1_SCHPO Probable mitochondrial chaperone bcs1 OS=Schizosaccharomyces pombe (strain 972 / ATCC 24843) GN=SPAC644.07 PE=2 SV=1//2.05335e-18
Chr10	20131076	20131763	688	Promoter (<=1kb)	20131494	20134097	2604	+	LOC_Os10g37620	0	sp|P0CT43|TF28_SCHPO Transposon Tf2-8 polyprotein OS=Schizosaccharomyces pombe (strain 972 / ATCC 24843) GN=Tf2-8 PE=3 SV=1//2.88366e-75
Chr10	20213613	20213986	374	Promoter (<=1kb)	20210953	20214287	3335	-	LOC_Os10g37770	301	sp|Q9ZPH9|PMTF_ARATH Probable methyltransferase PMT15 OS=Arabidopsis thaliana GN=At4g00750 PE=2 SV=1//6.0341e-69
Chr10	20266503	20266698	196	Promoter (1-2kb)	20265415	20267622	2208	+	LOC_Os10g37850	1088	sp|Q8GWV5|PUB3_ARATH U-box domain-containing protein 3 OS=Arabidopsis thaliana GN=PUB3 PE=2 SV=2//1.0096e-10
Chr10	20338625	20338827	203	Promoter (<=1kb)	20334741	20339093	4353	-	LOC_Os10g37960	266	sp|O00370|LORF2_HUMAN LINE-1 retrotransposable element ORF2 protein OS=Homo sapiens PE=1 SV=1//2.2252e-31
Chr10	20338958	20339170	213	Promoter (<=1kb)	20334741	20339093	4353	-	LOC_Os10g37960	0	sp|O00370|LORF2_HUMAN LINE-1 retrotransposable element ORF2 protein OS=Homo sapiens PE=1 SV=1//2.2252e-31
Chr10	20422688	20422903	216	Distal Intergenic	20411944	20416491	4548	-	LOC_Os10g38110	-6197	sp|Q50EK3|C04C1_PINTA Cytochrome P450 704C1 OS=Pinus taeda GN=CYP704C1 PE=2 SV=1//8.68416e-164
Chr10	20587512	20587707	196	Promoter (2-3kb)	20589759	20590856	1098	+	LOC_Os10g38580	-2052	sp|Q06398|GSTU6_ORYSJ Probable glutathione S-transferase GSTU6 OS=Oryza sativa subsp. japonica GN=GSTU6 PE=2 SV=2//3.83567e-74
Chr10	20625730	20626251	522	Promoter (2-3kb)	20622452	20623510	1059	-	LOC_Os10g38710	-2220	sp|Q06398|GSTU6_ORYSJ Probable glutathione S-transferase GSTU6 OS=Oryza sativa subsp. japonica GN=GSTU6 PE=2 SV=2//1.3523e-66
Chr10	20744502	20744729	228	Promoter (<=1kb)	20744421	20746446	2026	+	LOC_Os10g38940	81	sp|B3SGL0|BCH_GENLU Beta-carotene 3-hydroxylase, chloroplastic OS=Gentiana lutea GN=BHY PE=2 SV=1//1.39329e-93
Chr10	20901662	20901857	196	Promoter (1-2kb)	20900132	20902342	2211	+	LOC_Os10g39170	1530	sp|A7QEU4|PER5_VITVI Peroxidase 5 OS=Vitis vinifera GN=GSVIVT00037159001 PE=1 SV=2//3.38596e-98
Chr10	21122663	21122945	283	Promoter (<=1kb)	21118269	21122617	4349	-	LOC_Os10g39530	-46	sp|P10978|POLX_TOBAC Retrovirus-related Pol polyprotein from transposon TNT 1-94 OS=Nicotiana tabacum PE=2 SV=1//1.03026e-49
Chr10	21199819	21200051	233	Promoter (<=1kb)	21199763	21204782	5020	+	LOC_Os10g39670	56	sp|Q944A7|Y4523_ARATH Probable serine/threonine-protein kinase At4g35230 OS=Arabidopsis thaliana GN=At4g35230 PE=1 SV=1//0
Chr10	21331659	21331900	242	Promoter (<=1kb)	21331492	21332655	1164	+	LOC_Os10g39870	167	sp|Q2RYF4|CCME_RHORT Cytochrome c-type biogenesis protein CcmE OS=Rhodospirillum rubrum (strain ATCC 11170 / ATH 1.1.1 / DSM 467 / LMG 4362 / NCIB 8255 / S1) GN=ccmE PE=3 SV=1//2.88901e-23
Chr10	21386737	21387041	305	Promoter (<=1kb)	21386812	21387498	687	+	LOC_Os10g39936	0	sp|Q9LZJ6|ATL5_ARATH RING-H2 finger protein ATL5 OS=Arabidopsis thaliana GN=ATL5 PE=2 SV=1//1.29957e-11
Chr10	21414518	21415100	583	Promoter (2-3kb)	21417293	21419897	2605	+	LOC_Os10g39980	-2193	sp|Q54GU0|ARSB_DICDI Putative transporter arsB OS=Dictyostelium discoideum GN=arsB PE=2 SV=1//1.46533e-55
Chr10	21602356	21602562	207	Promoter (<=1kb)	21601595	21613523	11929	+	LOC_Os10g40324	761	sp|Q53JI9|SPSA5_ORYSJ Probable sucrose-phosphate synthase 5 OS=Oryza sativa subsp. japonica GN=SPS5 PE=2 SV=1//1.32617e-13
Chr10	21618596	21618791	196	Promoter (<=1kb)	21617952	21620589	2638	+	LOC_Os10g40360	644	sp|Q6NKX1|PROD2_ARATH Proline dehydrogenase 2, mitochondrial OS=Arabidopsis thaliana GN=POX2 PE=2 SV=1//5.8574e-113
Chr10	21636911	21637123	213	Promoter (<=1kb)	21627458	21636806	9349	-	LOC_Os10g40390	-105	sp|O81316|SCL6_ARATH Scarecrow-like protein 6 OS=Arabidopsis thaliana GN=SCL6 PE=1 SV=1//3.878e-60
Chr10	21651985	21652180	196	Promoter (<=1kb)	21652033	21655139	3107	+	LOC_Os10g40410	0	sp|Q9FGK0|NDUB8_ARATH NADH dehydrogenase [ubiquinone] 1 beta subcomplex subunit 8, mitochondrial OS=Arabidopsis thaliana GN=At5g47570 PE=2 SV=1//2.15897e-38
Chr10	21722316	21722742	427	Promoter (<=1kb)	21721755	21723342	1588	+	LOC_Os10g40559	561	sp|Q8H038|KATAM_ORYSJ Xyloglucan galactosyltransferase KATAMARI1 homolog OS=Oryza sativa subsp. japonica GN=Os03g0144800 PE=2 SV=1//1.89465e-58
Chr10	21866874	21867231	358	Promoter (<=1kb)	21863008	21867667	4660	-	LOC_Os10g40740	436	sp|Q8GZ38|UNE10_ARATH Transcription factor UNE10 OS=Arabidopsis thaliana GN=UNE10 PE=2 SV=1//3.79032e-31
Chr10	22180728	22180937	210	Promoter (<=1kb)	22180788	22182392	1605	+	LOC_Os10g41270	0	sp|O23522|PLA14_ARATH Phospholipase A1-Ibeta2, chloroplastic OS=Arabidopsis thaliana GN=At4g16820 PE=1 SV=2//5.83034e-111
Chr10	22235780	22236036	257	Promoter (<=1kb)	22227626	22235257	7632	-	LOC_Os10g41360	-523	sp|O22161|ADLO1_ARATH Protein ARABIDILLO 1 OS=Arabidopsis thaliana GN=FBX5 PE=1 SV=1//0
Chr10	22539571	22539831	261	Promoter (1-2kb)	22541239	22541931	693	+	LOC_Os10g41880	-1408	sp|O49607|SBT16_ARATH Subtilisin-like protease SBT1.6 OS=Arabidopsis thaliana GN=SBT1.6 PE=2 SV=1//1.58955e-08
Chr10	22549143	22549511	369	Promoter (<=1kb)	22549153	22550202	1050	+	LOC_Os10g41910	0	sp|Q9XIF0|DRL13_ARATH Putative disease resistance protein At1g59780 OS=Arabidopsis thaliana GN=At1g59780 PE=3 SV=1//7.82201e-12
Chr10	22734040	22734283	244	Promoter (<=1kb)	22729861	22734540	4680	-	LOC_Os10g42210	257	sp|Q9LKJ1|HIBC1_ARATH 3-hydroxyisobutyryl-CoA hydrolase 1 OS=Arabidopsis thaliana GN=CHY1 PE=1 SV=1//1.01699e-61
Chr10	22744715	22745071	357	Promoter (<=1kb)	22741637	22745840	4204	-	LOC_Os10g42230	769	sp|O22812|AHL10_ARATH AT-hook motif nuclear-localized protein 10 OS=Arabidopsis thaliana GN=AHL10 PE=1 SV=2//1.03096e-65
Chr10	22812456	22813392	937	Promoter (2-3kb)	22804429	22810386	5958	-	LOC_Os10g42364	-2070	sp|P0CT40|TF29_SCHPO Transposon Tf2-9 polyprotein OS=Schizosaccharomyces pombe (strain 972 / ATCC 24843) GN=Tf2-9 PE=3 SV=1//1.25386e-144
Chr10	22895867	22896074	208	Promoter (<=1kb)	22896683	22900039	3357	+	LOC_Os10g42470	-609	sp|P0CT40|TF29_SCHPO Transposon Tf2-9 polyprotein OS=Schizosaccharomyces pombe (strain 972 / ATCC 24843) GN=Tf2-9 PE=3 SV=1//1.38995e-20
Chr11	163247	163479	233	Promoter (<=1kb)	162282	163473	1192	-	LOC_Os11g01300	0	sp|P38389|SC61B_ARATH Protein transport protein Sec61 subunit beta OS=Arabidopsis thaliana GN=At2g45070 PE=1 SV=1//3.54211e-11
Chr11	186395	186603	209	Distal Intergenic	194176	199479	5304	+	LOC_Os11g01330	-7573	sp|Q8EU05|CLPB_OCEIH Chaperone protein ClpB OS=Oceanobacillus iheyensis (strain DSM 14371 / JCM 11309 / KCTC 3954 / HTE831) GN=clpB PE=3 SV=1//5.48358e-10
Chr11	377892	378087	196	Promoter (<=1kb)	378350	382270	3921	+	LOC_Os11g01700	-263	sp|P10978|POLX_TOBAC Retrovirus-related Pol polyprotein from transposon TNT 1-94 OS=Nicotiana tabacum PE=2 SV=1//1.53911e-131
Chr11	488949	489195	247	Promoter (<=1kb)	488824	489890	1067	-	LOC_Os11g01900	695	sp|Q93ZT5|EDL3_ARATH EID1-like F-box protein 3 OS=Arabidopsis thaliana GN=EDL3 PE=2 SV=1//2.5449e-07
Chr11	590887	591082	196	Promoter (<=1kb)	590584	590871	288	+	LOC_Os11g02140	303	sp|A2ZMR9|PCF8_ORYSI Transcription factor PCF8 OS=Oryza sativa subsp. indica GN=PCF8 PE=3 SV=1//1.50804e-10
Chr11	686091	686409	319	Promoter (1-2kb)	686084	687479	1396	-	LOC_Os11g02360	1070	sp|Q2QM77|PID_ORYSJ Protein kinase PINOID OS=Oryza sativa subsp. japonica GN=PID PE=2 SV=1//1.93128e-10
Chr11	763651	764008	358	Promoter (<=1kb)	759587	763334	3748	-	LOC_Os11g02480	-317	sp|Q9SHB5|WRK55_ARATH WRKY transcription factor 55 OS=Arabidopsis thaliana GN=WRKY55 PE=2 SV=1//3.95166e-19
Chr11	876562	876767	206	Promoter (<=1kb)	876096	879246	3151	+	LOC_Os11g02710	466	sp|Q2QYH7|C14C2_ORYSJ Cytochrome P450 714C2 OS=Oryza sativa subsp. japonica GN=CYP714C2 PE=2 SV=1//0
Chr11	952736	953208	473	Promoter (<=1kb)	947548	952356	4809	-	LOC_Os11g02830	-380	sp|Q8GXZ3|Y5102_ARATH Serine/threonine-protein kinase At5g01020 OS=Arabidopsis thaliana GN=At5g01020 PE=1 SV=1//1.85204e-167
Chr11	994147	994445	299	Promoter (2-3kb)	996578	998302	1725	+	LOC_Os11g02900	-2133	sp|P26808|POL_MLVFP Pol polyprotein OS=Friend murine leukemia virus (isolate PVC-211) GN=pol PE=3 SV=1//1.82924e-11
Chr11	1118466	1119083	618	Promoter (<=1kb)	1119742	1123350	3609	+	LOC_Os11g03110	-659	sp|Q2RB59|SCR1_ORYSJ Protein SCARECROW 1 OS=Oryza sativa subsp. japonica GN=SCR1 PE=1 SV=1//0
Chr11	1359832	1360036	205	Promoter (<=1kb)	1359188	1360544	1357	-	LOC_Os11g03520	508	sp|Q9FVV1|GDL28_ARATH GDSL esterase/lipase At1g71250 OS=Arabidopsis thaliana GN=At1g71250 PE=2 SV=1//4.04257e-26
Chr11	1524437	1524632	196	Promoter (<=1kb)	1522023	1524816	2794	-	LOC_Os11g03840	184	sp|P17801|KPRO_MAIZE Putative receptor protein kinase ZmPK1 OS=Zea mays GN=PK1 PE=2 SV=2//0
Chr11	1548225	1548420	196	Promoter (<=1kb)	1545920	1548578	2659	-	LOC_Os11g03880	158	sp|P17801|KPRO_MAIZE Putative receptor protein kinase ZmPK1 OS=Zea mays GN=PK1 PE=2 SV=2//0
Chr11	1649072	1649308	237	Promoter (<=1kb)	1646483	1648853	2371	-	LOC_Os11g04070	-219	sp|P41095|RLA0_ORYSJ 60S acidic ribosomal protein P0 OS=Oryza sativa subsp. japonica GN=Os08g0130500 PE=1 SV=3//0
Chr11	1652429	1652639	211	Promoter (<=1kb)	1649845	1652019	2175	-	LOC_Os11g04080	-410	sp|P08770|TRA1_MAIZE Putative AC transposase OS=Zea mays PE=2 SV=2//8.78543e-15
Chr11	1982241	1982436	196	Promoter (2-3kb)	1984667	1985966	1300	+	LOC_Os11g04650	-2231	sp|Q9SLG8|SSL2_ARATH Protein STRICTOSIDINE SYNTHASE-LIKE 2 OS=Arabidopsis thaliana GN=SSL2 PE=2 SV=1//2.1851e-10
Chr11	2224894	2225202	309	Promoter (<=1kb)	2224748	2229065	4318	+	LOC_Os11g05080	146	sp|Q9LDG2|TBL10_ARATH Protein trichome birefringence-like 10 OS=Arabidopsis thaliana GN=TBL10 PE=2 SV=1//1.66542e-161
Chr11	2528664	2528949	286	Promoter (<=1kb)	2529744	2532695	2952	+	LOC_Os11g05570	-795	sp|Q9SEZ6|RNH2A_ARATH Ribonuclease H2 subunit A OS=Arabidopsis thaliana GN=At2g25100 PE=2 SV=2//2.69407e-150
Chr11	2596531	2596821	291	Promoter (<=1kb)	2596488	2602747	6260	+	LOC_Os11g05690	43	sp|Q9SQZ0|CAAT7_ARATH Cationic amino acid transporter 7, chloroplastic OS=Arabidopsis thaliana GN=CAT7 PE=3 SV=1//0
Chr11	2677931	2678174	244	Promoter (<=1kb)	2677568	2679826	2259	+	LOC_Os11g05790	363	sp|Q9C8N5|STOP1_ARATH Protein SENSITIVE TO PROTON RHIZOTOXICITY 1 OS=Arabidopsis thaliana GN=STOP1 PE=2 SV=1//4.53596e-16
Chr11	2678334	2678529	196	Promoter (<=1kb)	2677568	2679826	2259	+	LOC_Os11g05790	766	sp|Q9C8N5|STOP1_ARATH Protein SENSITIVE TO PROTON RHIZOTOXICITY 1 OS=Arabidopsis thaliana GN=STOP1 PE=2 SV=1//4.53596e-16
Chr11	2696760	2697011	252	Promoter (<=1kb)	2696427	2699725	3299	+	LOC_Os11g05820	333	sp|Q97KG0|CLPB_CLOAB Chaperone protein ClpB OS=Clostridium acetobutylicum (strain ATCC 824 / DSM 792 / JCM 1419 / LMG 5710 / VKM B-1787) GN=clpB PE=3 SV=1//1.26143e-06
Chr11	2788881	2789207	327	Promoter (<=1kb)	2788996	2793735	4740	+	LOC_Os11g05930	0	sp|Q689G6|PRR95_ORYSJ Two-component response regulator-like PRR95 OS=Oryza sativa subsp. japonica GN=PRR95 PE=2 SV=1//3.3047e-38
Chr11	2977608	2977803	196	Promoter (<=1kb)	2978428	2981561	3134	+	LOC_Os11g06230	-625	sp|Q7XA40|RGA3_SOLBU Putative disease resistance protein RGA3 OS=Solanum bulbocastanum GN=RGA3 PE=2 SV=2//3.1211e-12
Chr11	3026882	3027290	409	Promoter (<=1kb)	3026741	3027364	624	+	LOC_Os11g06310	141	sp|Q53PN2|VITH4_ORYSJ Vacuolar iron transporter homolog 4 OS=Oryza sativa subsp. japonica GN=Os11g0161900 PE=3 SV=2//5.65827e-23
Chr11	3133793	3133988	196	Promoter (<=1kb)	3131826	3134282	2457	-	LOC_Os11g06480	294	sp|Q00531|JI60_HORVU 60 kDa jasmonate-induced protein OS=Hordeum vulgare PE=2 SV=1//2.89159e-08
Chr11	3142454	3142768	315	Promoter (2-3kb)	3138028	3140355	2328	-	LOC_Os11g06500	-2099	sp|P04323|POL3_DROME Retrovirus-related Pol polyprotein from transposon 17.6 OS=Drosophila melanogaster GN=pol PE=3 SV=1//8.84843e-13
Chr11	3255983	3256196	214	Promoter (<=1kb)	3256399	3261237	4839	+	LOC_Os11g06690	-203	sp|Q641I1|F135B_XENLA Protein FAM135B OS=Xenopus laevis GN=fam135b PE=2 SV=1//2.19192e-06
Chr11	3343052	3343247	196	Promoter (1-2kb)	3342973	3344692	1720	-	LOC_Os11g06820	1445	sp|Q53JG7|LAX4_ORYSJ Putative auxin transporter-like protein 4 OS=Oryza sativa subsp. japonica GN=Os11g0169200 PE=3 SV=1//0
Chr11	3533327	3533589	263	Promoter (1-2kb)	3532246	3533847	1602	+	LOC_Os11g07090	1081	sp|O04887|PME2_CITSI Pectinesterase 2 OS=Citrus sinensis GN=PECS-2.1 PE=2 SV=1//1.95603e-110
Chr11	3760197	3760392	196	Promoter (1-2kb)	3758489	3761568	3080	-	LOC_Os11g07460	1176	sp|Q53PH2|PCF3_ORYSJ Transcription factor PCF3 OS=Oryza sativa subsp. japonica GN=PCF3 PE=2 SV=1//1.73222e-135
Chr11	3856770	3856965	196	Promoter (<=1kb)	3853546	3857282	3737	-	LOC_Os11g07600	317	sp|Q84TH5|AB25G_ARATH ABC transporter G family member 25 OS=Arabidopsis thaliana GN=ABCG25 PE=2 SV=1//0
Chr11	3912751	3912946	196	Promoter (<=1kb)	3907595	3912502	4908	-	LOC_Os11g07650	-249	sp|P10978|POLX_TOBAC Retrovirus-related Pol polyprotein from transposon TNT 1-94 OS=Nicotiana tabacum PE=2 SV=1//1.56446e-19
Chr11	3927549	3927797	249	Promoter (<=1kb)	3926427	3926960	534	-	LOC_Os11g07690	-589	sp|Q9SS03|DIR21_ARATH Dirigent protein 21 OS=Arabidopsis thaliana GN=DIR21 PE=3 SV=1//5.37386e-47
Chr11	4021934	4022203	270	Promoter (<=1kb)	4021698	4034044	12347	+	LOC_Os11g07870	236	sp|Q8IYD8|FANCM_HUMAN Fanconi anemia group M protein OS=Homo sapiens GN=FANCM PE=1 SV=2//2.51344e-112
Chr11	4397516	4397809	294	Promoter (<=1kb)	4387460	4397808	10349	-	LOC_Os11g08330	0	sp|Q9LRE6|DPOD1_ORYSJ DNA polymerase delta catalytic subunit OS=Oryza sativa subsp. japonica GN=POLD1 PE=2 SV=1//0
Chr11	4481835	4482126	292	Promoter (<=1kb)	4481449	4482675	1227	+	LOC_Os11g08480	386	sp|Q0WMZ6|P4KG8_ARATH Phosphatidylinositol 4-kinase gamma 8 OS=Arabidopsis thaliana GN=PI4KG8 PE=2 SV=2//5.11731e-15
Chr11	4625178	4625407	230	Promoter (<=1kb)	4625070	4631252	6183	+	LOC_Os11g08670	108	sp|Q53NI2|NADK2_ORYSJ Probable NAD kinase 2, chloroplastic OS=Oryza sativa subsp. japonica GN=Os11g0191400 PE=2 SV=1//0
Chr11	4785371	4785716	346	Promoter (<=1kb)	4785220	4789394	4175	+	LOC_Os11g09010	151	sp|Q9S745|PAD4_ARATH Lipase-like PAD4 OS=Arabidopsis thaliana GN=PAD4 PE=1 SV=1//2.00858e-15
Chr11	4932186	4932403	218	Promoter (<=1kb)	4931980	4933854	1875	+	LOC_Os11g09190	206	sp|Q9C7A2|Y3236_ARATH Ankyrin repeat-containing protein At3g12360 OS=Arabidopsis thaliana GN=At3g12360 PE=2 SV=1//2.84873e-12
Chr11	5288921	5289194	274	Promoter (1-2kb)	5289938	5290291	354	-	LOC_Os11g09880	1097	sp|Q9FKD9|SINL6_ARATH Putative E3 ubiquitin-protein ligase SINA-like 6 OS=Arabidopsis thaliana GN=At5g37870 PE=3 SV=1//2.00888e-08
Chr11	5460388	5460665	278	Promoter (<=1kb)	5460665	5464655	3991	+	LOC_Os11g10100	0	sp|Q9CAD5|YODA_ARATH Mitogen-activated protein kinase kinase kinase YODA OS=Arabidopsis thaliana GN=YDA PE=1 SV=1//3.5233e-126
Chr11	5884192	5884531	340	Distal Intergenic	5873795	5880713	6919	-	LOC_Os11g10710	-3479	sp|Q6H8D5|COB22_ORYSJ Coatomer subunit beta&apos;-2 OS=Oryza sativa subsp. japonica GN=Os02g0209100 PE=2 SV=1//2.13434e-81
Chr11	5914287	5914483	197	Promoter (2-3kb)	5907950	5911943	3994	-	LOC_Os11g10760	-2344	sp|Q7XA42|RGA1_SOLBU Putative disease resistance protein RGA1 OS=Solanum bulbocastanum GN=RGA1 PE=2 SV=2//7.73939e-10
Chr11	6066497	6066771	275	Promoter (<=1kb)	6064996	6066797	1802	-	LOC_Os11g10990	26	sp|Q9SMS0|NDHT_ARATH NAD(P)H-quinone oxidoreductase subunit T, chloroplastic OS=Arabidopsis thaliana GN=ndhT PE=1 SV=1//1.98017e-59
Chr11	6143651	6143871	221	Promoter (<=1kb)	6143031	6146621	3591	+	LOC_Os11g11100	620	sp|Q9M2K4|BZP61_ARATH Basic leucine zipper 61 OS=Arabidopsis thaliana GN=BZIP61 PE=1 SV=1//4.45521e-19
Chr11	6384438	6384698	261	Promoter (1-2kb)	6381668	6385839	4172	-	LOC_Os11g11490	1141	sp|Q9FIJ6|ACCR4_ARATH Serine/threonine-protein kinase-like protein CCR4 OS=Arabidopsis thaliana GN=CCR4 PE=1 SV=1//3.16828e-29
Chr11	6394278	6394663	386	Promoter (<=1kb)	6392784	6394753	1970	-	LOC_Os11g11500	90	sp|Q2R8P2|SPZ9_ORYSJ Probable non-inhibitory serpin-Z9 OS=Oryza sativa subsp. japonica GN=Os11g0222200 PE=2 SV=2//0
Chr11	6405267	6405531	265	Promoter (1-2kb)	6405088	6406658	1571	-	LOC_Os11g11520	1127	sp|Q2R8P2|SPZ9_ORYSJ Probable non-inhibitory serpin-Z9 OS=Oryza sativa subsp. japonica GN=Os11g0222200 PE=2 SV=2//8.12332e-19
Chr11	6408077	6408463	387	Promoter (1-2kb)	6405088	6406658	1571	-	LOC_Os11g11520	-1419	sp|Q2R8P2|SPZ9_ORYSJ Probable non-inhibitory serpin-Z9 OS=Oryza sativa subsp. japonica GN=Os11g0222200 PE=2 SV=2//8.12332e-19
Chr11	6424841	6425058	218	Promoter (<=1kb)	6420713	6424350	3638	-	LOC_Os11g11550	-491	sp|Q9M667|RPP13_ARATH Disease resistance protein RPP13 OS=Arabidopsis thaliana GN=RPP13 PE=2 SV=2//2.35778e-37
Chr11	6516295	6516490	196	Promoter (<=1kb)	6516467	6517819	1353	+	LOC_Os11g11720	0	sp|Q53P09|SPZ8_ORYSJ Putative serpin-Z8 OS=Oryza sativa subsp. japonica GN=Os11g0224800 PE=3 SV=2//1.77827e-75
Chr11	6531125	6531320	196	Promoter (<=1kb)	6530949	6532307	1359	+	LOC_Os11g11760	176	sp|Q53P09|SPZ8_ORYSJ Putative serpin-Z8 OS=Oryza sativa subsp. japonica GN=Os11g0224800 PE=3 SV=2//0
Chr11	6755677	6755973	297	Promoter (<=1kb)	6755790	6757488	1699	+	LOC_Os11g12110	0	sp|Q7LHG5|YI31B_YEAST Transposon Ty3-I Gag-Pol polyprotein OS=Saccharomyces cerevisiae (strain ATCC 204508 / S288c) GN=TY3B-I PE=3 SV=2//2.3031e-41
Chr11	6889868	6890117	250	Promoter (<=1kb)	6889864	6896350	6487	+	LOC_Os11g12340	4	sp|Q39214|RPM1_ARATH Disease resistance protein RPM1 OS=Arabidopsis thaliana GN=RPM1 PE=1 SV=1//1.15094e-105
Chr11	6926022	6926225	204	Promoter (<=1kb)	6925243	6927549	2307	+	LOC_Os11g12410	779	sp|Q53Q31|SPZ6A_ORYSJ Putative serpin-Z6A OS=Oryza sativa subsp. japonica GN=Os11g0230400 PE=3 SV=2//0
Chr11	7494451	7494689	239	Promoter (<=1kb)	7493921	7495461	1541	-	LOC_Os11g13670	772	sp|Q9LT10|CXE18_ARATH Probable carboxylesterase 18 OS=Arabidopsis thaliana GN=CXE18 PE=1 SV=1//1.63548e-90
Chr11	7738321	7738516	196	Distal Intergenic	7726108	7730158	4051	-	LOC_Os11g13960	-8163	sp|P10978|POLX_TOBAC Retrovirus-related Pol polyprotein from transposon TNT 1-94 OS=Nicotiana tabacum PE=2 SV=1//3.22515e-15
Chr11	7746212	7746430	219	Promoter (<=1kb)	7745980	7747416	1437	-	LOC_Os11g13970	986	sp|Q9SND9|Y3028_ARATH Uncharacterized acetyltransferase At3g50280 OS=Arabidopsis thaliana GN=At3g50280 PE=3 SV=1//2.13523e-33
Chr11	7750514	7750950	437	Promoter (<=1kb)	7750253	7751125	873	-	LOC_Os11g13980	175	sp|Q53M11|HS219_ORYSJ 21.9 kDa heat shock protein OS=Oryza sativa subsp. japonica GN=HSP21.9 PE=2 SV=1//4.21021e-70
Chr11	7878393	7878736	344	Promoter (<=1kb)	7877895	7879548	1654	-	LOC_Os11g14140	812	sp|O80582|FBK46_ARATH F-box/kelch-repeat protein At2g44130 OS=Arabidopsis thaliana GN=At2g44130 PE=2 SV=2//2.38622e-55
Chr11	8086292	8086511	220	Promoter (<=1kb)	8084983	8086522	1540	-	LOC_Os11g14400	11	sp|P48979|PGLR_PRUPE Polygalacturonase OS=Prunus persica PE=2 SV=1//1.38791e-81
Chr11	8215396	8215722	327	Promoter (<=1kb)	8215307	8221433	6127	+	LOC_Os11g14590	89	sp|Q9LNG5|PPP7L_ARATH Serine/threonine-protein phosphatase 7 long form homolog OS=Arabidopsis thaliana GN=At1g48120 PE=2 SV=1//4.51441e-08
Chr11	8226128	8226429	302	Promoter (<=1kb)	8225978	8234442	8465	+	LOC_Os11g14610	150	sp|Q7LHG5|YI31B_YEAST Transposon Ty3-I Gag-Pol polyprotein OS=Saccharomyces cerevisiae (strain ATCC 204508 / S288c) GN=TY3B-I PE=3 SV=2//3.60589e-124
Chr11	8422417	8422717	301	Promoter (<=1kb)	8417484	8422701	5218	-	LOC_Os11g14950	0	sp|Q93YZ7|ILVH2_ARATH Acetolactate synthase small subunit 2, chloroplastic OS=Arabidopsis thaliana GN=At2g31810 PE=1 SV=1//0
Chr11	8441034	8441304	271	Promoter (<=1kb)	8439761	8441556	1796	-	LOC_Os11g14980	252	sp|Q9LTV8|PP224_ARATH Pentatricopeptide repeat-containing protein At3g12770 OS=Arabidopsis thaliana GN=PCMP-H43 PE=2 SV=1//7.48227e-25
Chr11	8978132	8978327	196	Promoter (<=1kb)	8971934	8977435	5502	-	LOC_Os11g16290	-697	sp|Q0JC27|NLP2_ORYSJ Protein NLP2 OS=Oryza sativa subsp. japonica GN=NLP2 PE=2 SV=2//1.12227e-47
Chr11	9059003	9059282	280	Promoter (<=1kb)	9055797	9059357	3561	-	LOC_Os11g16390	75	sp|Q9LND7|SKI16_ARATH F-box protein SKIP16 OS=Arabidopsis thaliana GN=SKIP16 PE=1 SV=1//7.13979e-108
Chr11	10287488	10287909	422	Promoter (<=1kb)	10287413	10289421	2009	+	LOC_Os11g18250	75	sp|Q4R6I1|GIN1_MACFA Gypsy retrotransposon integrase-like protein 1 OS=Macaca fascicularis GN=GIN1 PE=2 SV=1//1.51719e-12
Chr11	10398940	10399233	294	Promoter (<=1kb)	10399499	10401302	1804	+	LOC_Os11g18430	-266	sp|F9VN79|RNH_SULTO Ribonuclease HI OS=Sulfolobus tokodaii (strain DSM 16993 / JCM 10545 / NBRC 100140 / 7) GN=rnhA PE=1 SV=1//5.33891e-08
Chr11	10399531	10399726	196	Promoter (<=1kb)	10399499	10401302	1804	+	LOC_Os11g18430	32	sp|F9VN79|RNH_SULTO Ribonuclease HI OS=Sulfolobus tokodaii (strain DSM 16993 / JCM 10545 / NBRC 100140 / 7) GN=rnhA PE=1 SV=1//5.33891e-08
Chr11	10498677	10498872	196	Promoter (<=1kb)	10494338	10498200	3863	-	LOC_Os11g18600	-477	sp|Q8I7P9|POL5_DROME Retrovirus-related Pol polyprotein from transposon opus OS=Drosophila melanogaster GN=pol PE=3 SV=1//3.34209e-65
Chr11	10615581	10615776	196	Promoter (<=1kb)	10609647	10615875	6229	-	LOC_Os11g18730	99	sp|Q9SGZ5|BXL7_ARATH Probable beta-D-xylosidase 7 OS=Arabidopsis thaliana GN=BXL7 PE=2 SV=2//0
Chr11	10884564	10884963	400	Promoter (2-3kb)	10887087	10889986	2900	+	LOC_Os11g19100	-2124	sp|Q04832|HEXP_LEIMA DNA-binding protein HEXBP OS=Leishmania major GN=HEXBP PE=3 SV=1//7.02289e-09
Chr11	11213552	11213764	213	Promoter (<=1kb)	11212708	11214432	1725	+	LOC_Os11g19480	844	sp|Q9C9N5|Y1668_ARATH Probable inactive leucine-rich repeat receptor-like protein kinase At1g66830 OS=Arabidopsis thaliana GN=At1g66830 PE=2 SV=1//2.39259e-47
Chr11	11298181	11298699	519	Promoter (<=1kb)	11299210	11306608	7399	+	LOC_Os11g19610	-511	sp|P04146|COPIA_DROME Copia protein OS=Drosophila melanogaster GN=GIP PE=1 SV=3//9.98468e-19
Chr11	11576836	11577164	329	Distal Intergenic	11583390	11586939	3550	+	LOC_Os11g20080	-6226	sp|A8QW51|OMT2_SORBI Probable O-methyltransferase 2 OS=Sorghum bicolor GN=OMT2 PE=2 SV=1//1.16514e-119
Chr11	12647450	12647676	227	Distal Intergenic	12651098	12657795	6698	+	LOC_Os11g22010	-3422	sp|Q9UR07|TF211_SCHPO Transposon Tf2-11 polyprotein OS=Schizosaccharomyces pombe (strain 972 / ATCC 24843) GN=Tf2-11 PE=3 SV=1//4.9911e-14
Chr11	12780184	12780519	336	Promoter (<=1kb)	12781261	12787398	6138	+	LOC_Os11g22300	-742	sp|P0CT43|TF28_SCHPO Transposon Tf2-8 polyprotein OS=Schizosaccharomyces pombe (strain 972 / ATCC 24843) GN=Tf2-8 PE=3 SV=1//8.44893e-19
Chr11	12823445	12823723	279	Promoter (<=1kb)	12824409	12828636	4228	+	LOC_Os11g22370	-686	sp|P10978|POLX_TOBAC Retrovirus-related Pol polyprotein from transposon TNT 1-94 OS=Nicotiana tabacum PE=2 SV=1//0
Chr11	12882385	12882628	244	Promoter (<=1kb)	12875902	12882928	7027	-	LOC_Os11g22430	300	sp|Q9UR07|TF211_SCHPO Transposon Tf2-11 polyprotein OS=Schizosaccharomyces pombe (strain 972 / ATCC 24843) GN=Tf2-11 PE=3 SV=1//4.29007e-111
Chr11	12986494	12986785	292	Promoter (<=1kb)	12986596	12994696	8101	+	LOC_Os11g22580	0	sp|P04323|POL3_DROME Retrovirus-related Pol polyprotein from transposon 17.6 OS=Drosophila melanogaster GN=pol PE=3 SV=1//1.10349e-15
Chr11	13749400	13749595	196	Promoter (<=1kb)	13743944	13749580	5637	-	LOC_Os11g24170	0	sp|Q7XBQ9|RGA2_SOLBU Disease resistance protein RGA2 OS=Solanum bulbocastanum GN=RGA2 PE=1 SV=1//9.81366e-109
Chr11	13844758	13844953	196	Promoter (<=1kb)	13844635	13848755	4121	+	LOC_Os11g24300	123	sp|Q9SSE8|GLYT1_ARATH Probable glycosyltransferase At3g07620 OS=Arabidopsis thaliana GN=At3g07620 PE=3 SV=1//1.71143e-12
Chr11	14026854	14027049	196	Promoter (<=1kb)	14027553	14029899	2347	+	LOC_Os11g24570	-504	sp|Q9M3A8|PP273_ARATH Pentatricopeptide repeat-containing protein At3g49240 OS=Arabidopsis thaliana GN=EMB1796 PE=2 SV=1//5.0199e-174
Chr11	14950763	14950958	196	Promoter (1-2kb)	14943101	14949448	6348	-	LOC_Os11g26120	-1315	sp|O92815|POL_WDSV Gag-Pol polyprotein OS=Walleye dermal sarcoma virus GN=gag-pol PE=1 SV=2//7.43903e-09
Chr11	14992093	14992322	230	Promoter (<=1kb)	14987029	14991358	4330	-	LOC_Os11g26180	-735	sp|Q8I7P9|POL5_DROME Retrovirus-related Pol polyprotein from transposon opus OS=Drosophila melanogaster GN=pol PE=3 SV=1//2.54668e-46
Chr11	15459737	15459943	207	Promoter (<=1kb)	15459459	15462365	2907	+	LOC_Os11g26910	278	sp|Q9FHW7|SKP1B_ARATH SKP1-like protein 1B OS=Arabidopsis thaliana GN=SKP1B PE=1 SV=1//2.20446e-63
Chr11	15479784	15479979	196	Distal Intergenic	15472810	15476251	3442	-	LOC_Os11g26920	-3533	sp|Q43716|UFOG_PETHY Anthocyanidin 3-O-glucosyltransferase OS=Petunia hybrida GN=RT PE=2 SV=1//4.75388e-51
Chr11	15498076	15498271	196	Promoter (<=1kb)	15496772	15498561	1790	-	LOC_Os11g26950	290	sp|Q43716|UFOG_PETHY Anthocyanidin 3-O-glucosyltransferase OS=Petunia hybrida GN=RT PE=2 SV=1//5.95249e-139
Chr11	15840405	15840600	196	Promoter (<=1kb)	15839978	15844401	4424	+	LOC_Os11g27530	427	sp|Q9SFV2|FHA2_ARATH FHA domain-containing protein FHA2 OS=Arabidopsis thaliana GN=FHA2 PE=1 SV=1//1.88253e-41
Chr11	16160746	16161279	534	Promoter (<=1kb)	16144745	16161505	16761	-	LOC_Os11g28104	226	sp|Q9CAL2|CRK3_ARATH Cysteine-rich receptor-like protein kinase 3 OS=Arabidopsis thaliana GN=CRK3 PE=2 SV=1//1.0972e-103
Chr11	16221272	16221509	238	Promoter (<=1kb)	16217585	16220923	3339	-	LOC_Os11g28210	-349	sp|Q7LHG5|YI31B_YEAST Transposon Ty3-I Gag-Pol polyprotein OS=Saccharomyces cerevisiae (strain ATCC 204508 / S288c) GN=TY3B-I PE=3 SV=2//2.71067e-19
Chr11	16808957	16809152	196	Promoter (<=1kb)	16807964	16809227	1264	+	LOC_Os11g29030	993	sp|Q9STE7|R13L3_ARATH Putative disease resistance RPP13-like protein 3 OS=Arabidopsis thaliana GN=RPP13L3 PE=3 SV=1//4.59713e-13
Chr11	16986865	16987109	245	Promoter (1-2kb)	16985590	16987260	1671	+	LOC_Os11g29290	1275	sp|Q9SMP5|C94B3_ARATH Cytochrome P450 94B3 OS=Arabidopsis thaliana GN=CYP94B3 PE=2 SV=1//1.13293e-160
Chr11	17064443	17064675	233	Promoter (<=1kb)	17064395	17066286	1892	+	LOC_Os11g29400	48	sp|Q2R480|6PGD2_ORYSJ 6-phosphogluconate dehydrogenase, decarboxylating 2, chloroplastic OS=Oryza sativa subsp. japonica GN=G6PGH2 PE=2 SV=1//0
Chr11	17230621	17231379	759	Promoter (<=1kb)	17229938	17231917	1980	+	LOC_Os11g29710	683	sp|Q9FYF9|FB76_ARATH F-box protein At1g67340 OS=Arabidopsis thaliana GN=At1g67340 PE=1 SV=1//1.36107e-33
Chr11	17237335	17237739	405	Promoter (<=1kb)	17234285	17238178	3894	-	LOC_Os11g29720	439	sp|Q9LMX7|C78A5_ARATH Cytochrome P450 78A5 OS=Arabidopsis thaliana GN=CYP78A5 PE=2 SV=1//2.67487e-114
Chr11	17284157	17284407	251	Promoter (<=1kb)	17284028	17285405	1378	+	LOC_Os11g29780	129	sp|Q6NMK1|GXM1_ARATH Glucuronoxylan 4-O-methyltransferase 1 OS=Arabidopsis thaliana GN=GXM1 PE=1 SV=1//9.62667e-43
Chr11	17284833	17285084	252	Promoter (<=1kb)	17284028	17285405	1378	+	LOC_Os11g29780	805	sp|Q6NMK1|GXM1_ARATH Glucuronoxylan 4-O-methyltransferase 1 OS=Arabidopsis thaliana GN=GXM1 PE=1 SV=1//9.62667e-43
Chr11	17328635	17328967	333	Promoter (<=1kb)	17329608	17332992	3385	+	LOC_Os11g29850	-641	sp|Q8LEF6|AB11I_ARATH ABC transporter I family member 11, chloroplastic OS=Arabidopsis thaliana GN=ABCI11 PE=2 SV=1//5.66476e-75
Chr11	17410410	17410626	217	Promoter (<=1kb)	17407872	17410970	3099	-	LOC_Os11g29960	344	sp|P10978|POLX_TOBAC Retrovirus-related Pol polyprotein from transposon TNT 1-94 OS=Nicotiana tabacum PE=2 SV=1//1.22322e-11
Chr11	17596560	17596844	285	Promoter (<=1kb)	17596500	17596889	390	-	LOC_Os11g30290	45	sp|Q0WMV8|PHF5B_ARATH PHD finger-like domain-containing protein 5B OS=Arabidopsis thaliana GN=At1g07170 PE=2 SV=1//3.8022e-16
Chr11	17885722	17886016	295	Promoter (1-2kb)	17879423	17884231	4809	-	LOC_Os11g30700	-1491	sp|P10978|POLX_TOBAC Retrovirus-related Pol polyprotein from transposon TNT 1-94 OS=Nicotiana tabacum PE=2 SV=1//1.44471e-18
Chr11	17942429	17942841	413	Promoter (<=1kb)	17943544	17945390	1847	+	LOC_Os11g30810	-703	sp|Q9M1V2|SOT5_ARATH Cytosolic sulfotransferase 5 OS=Arabidopsis thaliana GN=SOT5 PE=1 SV=1//4.52914e-76
Chr11	18196398	18196664	267	Promoter (<=1kb)	18196140	18203066	6927	+	LOC_Os11g31220	258	sp|Q9LNG5|PPP7L_ARATH Serine/threonine-protein phosphatase 7 long form homolog OS=Arabidopsis thaliana GN=At1g48120 PE=2 SV=1//4.15903e-60
Chr11	18729201	18729622	422	Promoter (<=1kb)	18728970	18733435	4466	+	LOC_Os11g31880	231	sp|P36623|PMGY_SCHPO Phosphoglycerate mutase OS=Schizosaccharomyces pombe (strain 972 / ATCC 24843) GN=gpm1 PE=1 SV=1//7.48855e-07
Chr11	18922080	18922444	365	Promoter (<=1kb)	18922046	18925259	3214	+	LOC_Os11g32100	34	sp|Q9LSE2|ICE1_ARATH Transcription factor ICE1 OS=Arabidopsis thaliana GN=SCRM PE=1 SV=1//2.97077e-86
Chr11	19080608	19080838	231	Promoter (1-2kb)	19076279	19079312	3034	-	LOC_Os11g32280	-1296	sp|O80438|MAK3_ARATH N-alpha-acetyltransferase MAK3 OS=Arabidopsis thaliana GN=MAK3 PE=2 SV=1//2.88142e-89
Chr11	19082958	19083191	234	Promoter (<=1kb)	19082900	19083859	960	-	LOC_Os11g32290	668	sp|A6QLH5|ERI3_BOVIN ERI1 exoribonuclease 3 OS=Bos taurus GN=ERI3 PE=2 SV=1//3.75013e-28
Chr11	19092842	19093079	238	Promoter (<=1kb)	19092865	19095328	2464	+	LOC_Os11g32320	0	sp|Q9LSE4|CCB1_ARATH Protein COFACTOR ASSEMBLY OF COMPLEX C SUBUNIT B CCB1, chloroplastic OS=Arabidopsis thaliana GN=CCB1 PE=1 SV=1//7.07204e-96
Chr11	19181895	19182134	240	Promoter (<=1kb)	19180541	19182360	1820	-	LOC_Os11g32500	226	sp|P04170|RUBR1_DESDA Rubredoxin-1 OS=Desulfovibrio desulfuricans (strain ATCC 27774 / DSM 6949) GN=rd1 PE=1 SV=1//2.81896e-06
Chr11	19188986	19189204	219	Promoter (<=1kb)	19188565	19190125	1561	-	LOC_Os11g32520	921	sp|Q2R3B4|GH313_ORYSJ Probable indole-3-acetic acid-amido synthetase GH3.13 OS=Oryza sativa subsp. japonica GN=GH3.13 PE=2 SV=1//0
Chr11	19237347	19237637	291	Promoter (<=1kb)	19236424	19238358	1935	+	LOC_Os11g32610	923	sp|Q8LIL0|CUS_ORYSJ Bisdemethoxycurcumin synthase OS=Oryza sativa subsp. japonica GN=Os07g0271500 PE=1 SV=2//1.07614e-91
Chr11	19370678	19370956	279	Promoter (<=1kb)	19369196	19370612	1417	-	LOC_Os11g32790	-66	sp|Q69XM6|C7344_ORYSJ Cytochrome P450 734A4 OS=Oryza sativa subsp. japonica GN=CYP734A4 PE=2 SV=1//3.13891e-35
Chr11	19429297	19429590	294	Promoter (<=1kb)	19421481	19429665	8185	-	LOC_Os11g32880	75	sp|Q55750|MFD_SYNY3 Transcription-repair-coupling factor OS=Synechocystis sp. (strain PCC 6803 / Kazusa) GN=mfd PE=3 SV=1//3.57218e-140
Chr11	19507621	19507816	196	Promoter (1-2kb)	19509288	19509923	636	+	LOC_Os11g33000	-1472	sp|Q0DN94|PROA_ORYSJ 10 kDa prolamin OS=Oryza sativa subsp. japonica GN=Os03g0766000 PE=2 SV=1//7.85976e-28
Chr11	19580395	19580603	209	Promoter (<=1kb)	19580306	19585544	5239	+	LOC_Os11g33100	89	sp|Q55909|Y305_SYNY3 TVP38/TMEM64 family membrane protein slr0305 OS=Synechocystis sp. (strain PCC 6803 / Kazusa) GN=slr0305 PE=3 SV=1//2.04516e-08
Chr11	19596085	19596289	205	Promoter (<=1kb)	19588956	19596476	7521	-	LOC_Os11g33120	187	sp|Q2HXL0|RBOHC_SOLTU Respiratory burst oxidase homolog protein C OS=Solanum tuberosum GN=RBOHC PE=1 SV=2//0
Chr11	19719713	19719973	261	Promoter (1-2kb)	19709943	19718298	8356	-	LOC_Os11g33330	-1415	sp|D1ZKF3|AMPP1_SORMK Probable Xaa-Pro aminopeptidase P OS=Sordaria macrospora (strain ATCC MYA-333 / DSM 997 / K(L3346) / K-hell) GN=AMPP PE=3 SV=1//2.67539e-171
Chr11	19807282	19807737	456	Promoter (<=1kb)	19803005	19806822	3818	-	LOC_Os11g33450	-460	sp|Q9SD53|Y3720_ARATH UPF0481 protein At3g47200 OS=Arabidopsis thaliana GN=At3g47200 PE=2 SV=1//6.76451e-16
Chr11	19810690	19811009	320	Promoter (<=1kb)	19808007	19810171	2165	-	LOC_Os11g33440	-519	sp|Q9SD53|Y3720_ARATH UPF0481 protein At3g47200 OS=Arabidopsis thaliana GN=At3g47200 PE=2 SV=1//1.12117e-09
Chr11	19950171	19950470	300	Promoter (<=1kb)	19949633	19953349	3717	+	LOC_Os11g34090	538	sp|Q9SD53|Y3720_ARATH UPF0481 protein At3g47200 OS=Arabidopsis thaliana GN=At3g47200 PE=2 SV=1//2.69182e-40
Chr11	19983433	19983737	305	Promoter (<=1kb)	19971780	19983711	11932	-	LOC_Os11g34120	0	sp|Q6P2B1|TNPO3_MOUSE Transportin-3 OS=Mus musculus GN=Tnpo3 PE=1 SV=1//2.74617e-07
Chr11	19996570	19996840	271	Promoter (<=1kb)	19992104	19996973	4870	-	LOC_Os11g34150	133	sp|P0CB26|Y1089_ARATH Uncharacterized protein At1g10890 OS=Arabidopsis thaliana GN=At1g10890 PE=4 SV=1//2.3731e-13
Chr11	20107390	20107713	324	Promoter (<=1kb)	20097879	20107624	9746	-	LOC_Os11g34305	0	sp|Q94C32|MRG1_ARATH Protein MRG1 OS=Arabidopsis thaliana GN=MRG1 PE=1 SV=1//4.3749e-84
Chr11	20158537	20158777	241	Promoter (<=1kb)	20158507	20164146	5640	+	LOC_Os11g34410	30	sp|Q5RBK0|GIN1_PONAB Gypsy retrotransposon integrase-like protein 1 OS=Pongo abelii GN=GIN1 PE=2 SV=1//3.82787e-20
Chr11	20263478	20263673	196	Promoter (<=1kb)	20264311	20275890	11580	+	LOC_Os11g34624	-638	sp|O23082|Y4960_ARATH Putative receptor-like protein kinase At4g00960 OS=Arabidopsis thaliana GN=At4g00960 PE=3 SV=2//1.31867e-112
Chr11	20470985	20471180	196	Promoter (<=1kb)	20466689	20470502	3814	-	LOC_Os11g34930	-483	sp|P10978|POLX_TOBAC Retrovirus-related Pol polyprotein from transposon TNT 1-94 OS=Nicotiana tabacum PE=2 SV=1//0
Chr11	20661865	20662060	196	Promoter (<=1kb)	20660238	20661856	1619	-	LOC_Os11g35240	-9	sp|Q9LMN7|WAK5_ARATH Wall-associated receptor kinase 5 OS=Arabidopsis thaliana GN=WAK5 PE=2 SV=1//4.03024e-28
Chr11	20809755	20810406	652	Promoter (<=1kb)	20808977	20812137	3161	+	LOC_Os11g35510	778	sp|P0C2F6|RNHX1_ARATH Putative ribonuclease H protein At1g65750 OS=Arabidopsis thaliana GN=At1g65750 PE=3 SV=1//3.86178e-08
Chr11	20855345	20855800	456	Promoter (1-2kb)	20844883	20856893	12011	-	LOC_Os11g35560	1093	sp|Q7LHG5|YI31B_YEAST Transposon Ty3-I Gag-Pol polyprotein OS=Saccharomyces cerevisiae (strain ATCC 204508 / S288c) GN=TY3B-I PE=3 SV=2//1.84022e-83
Chr11	20855940	20856264	325	Promoter (<=1kb)	20844883	20856893	12011	-	LOC_Os11g35560	629	sp|Q7LHG5|YI31B_YEAST Transposon Ty3-I Gag-Pol polyprotein OS=Saccharomyces cerevisiae (strain ATCC 204508 / S288c) GN=TY3B-I PE=3 SV=2//1.84022e-83
Chr11	20912655	20912850	196	Promoter (<=1kb)	20912698	20920136	7439	+	LOC_Os11g35680	0	sp|Q8I7P9|POL5_DROME Retrovirus-related Pol polyprotein from transposon opus OS=Drosophila melanogaster GN=pol PE=3 SV=1//7.40778e-88
Chr11	21040119	21040314	196	Promoter (<=1kb)	21040863	21044057	3195	+	LOC_Os11g35850	-549	sp|Q9FL28|FLS2_ARATH LRR receptor-like serine/threonine-protein kinase FLS2 OS=Arabidopsis thaliana GN=FLS2 PE=1 SV=1//6.61107e-47
Chr11	21235831	21236026	196	Promoter (<=1kb)	21232639	21235267	2629	-	LOC_Os11g36120	-564	sp|C0LGQ5|GSO1_ARATH LRR receptor-like serine/threonine-protein kinase GSO1 OS=Arabidopsis thaliana GN=GSO1 PE=2 SV=1//1.38099e-15
Chr11	21523999	21524378	380	Promoter (<=1kb)	21524812	21527175	2364	+	LOC_Os11g36480	-434	sp|Q04832|HEXP_LEIMA DNA-binding protein HEXBP OS=Leishmania major GN=HEXBP PE=3 SV=1//1.02488e-07
Chr11	21535869	21536118	250	Promoter (<=1kb)	21535085	21535822	738	+	LOC_Os11g36490	784	sp|Q9SVC6|PUB22_ARATH E3 ubiquitin-protein ligase PUB22 OS=Arabidopsis thaliana GN=PUB22 PE=1 SV=1//8.44615e-12
Chr11	21687234	21687716	483	Promoter (<=1kb)	21687447	21691214	3768	+	LOC_Os11g36740	0	sp|Q9FG14|MYOB7_ARATH Myosin-binding protein 7 OS=Arabidopsis thaliana GN=MYOB7 PE=1 SV=1//1.96895e-15
Chr11	22139058	22139396	339	Promoter (<=1kb)	22139918	22143879	3962	+	LOC_Os11g37510	-522	sp|Q2W2J2|RL4_MAGSA 50S ribosomal protein L4 OS=Magnetospirillum magneticum (strain AMB-1 / ATCC 700264) GN=rplD PE=3 SV=1//5.84812e-63
Chr11	22139958	22140163	206	Promoter (<=1kb)	22139918	22143879	3962	+	LOC_Os11g37510	40	sp|Q2W2J2|RL4_MAGSA 50S ribosomal protein L4 OS=Magnetospirillum magneticum (strain AMB-1 / ATCC 700264) GN=rplD PE=3 SV=1//5.84812e-63
Chr11	22471125	22471441	317	Promoter (<=1kb)	22468253	22471487	3235	-	LOC_Os11g37900	46	sp|Q5XEP9|KCS17_ARATH 3-ketoacyl-CoA synthase 17 OS=Arabidopsis thaliana GN=KCS17 PE=2 SV=2//0
Chr11	22594258	22594473	216	Promoter (2-3kb)	22586350	22592054	5705	-	LOC_Os11g38090	-2204	sp|P0CT39|TF26_SCHPO Transposon Tf2-6 polyprotein OS=Schizosaccharomyces pombe (strain 972 / ATCC 24843) GN=Tf2-6 PE=3 SV=1//4.96626e-152
Chr11	22944241	22944554	314	Promoter (<=1kb)	22941580	22944104	2525	-	LOC_Os11g38660	-137	sp|B0BN95|HARB1_RAT Putative nuclease HARBI1 OS=Rattus norvegicus GN=Harbi1 PE=2 SV=1//3.73914e-09
Chr11	23085076	23085335	260	Distal Intergenic	23090802	23096415	5614	+	LOC_Os11g38820	-5467	sp|Q7LHG5|YI31B_YEAST Transposon Ty3-I Gag-Pol polyprotein OS=Saccharomyces cerevisiae (strain ATCC 204508 / S288c) GN=TY3B-I PE=3 SV=2//1.4178e-134
Chr11	23087208	23087403	196	Distal Intergenic	23090802	23096415	5614	+	LOC_Os11g38820	-3399	sp|Q7LHG5|YI31B_YEAST Transposon Ty3-I Gag-Pol polyprotein OS=Saccharomyces cerevisiae (strain ATCC 204508 / S288c) GN=TY3B-I PE=3 SV=2//1.4178e-134
Chr11	23315140	23315335	196	Promoter (<=1kb)	23314815	23319815	5001	+	LOC_Os11g39170	325	sp|P10978|POLX_TOBAC Retrovirus-related Pol polyprotein from transposon TNT 1-94 OS=Nicotiana tabacum PE=2 SV=1//1.16618e-40
Chr11	23331057	23331586	530	Promoter (2-3kb)	23333663	23337423	3761	+	LOC_Os11g39190	-2077	sp|Q01631|CYAA_NEUCR Adenylate cyclase OS=Neurospora crassa (strain ATCC 24698 / 74-OR23-1A / CBS 708.71 / DSM 1257 / FGSC 987) GN=cr-1 PE=3 SV=2//2.72055e-08
Chr11	23357963	23358371	409	Promoter (<=1kb)	23354149	23358318	4170	-	LOC_Os11g39220	0	sp|O65201|ACOX2_ARATH Acyl-coenzyme A oxidase 2, peroxisomal OS=Arabidopsis thaliana GN=ACX2 PE=1 SV=2//0
Chr11	23611739	23612005	267	Promoter (<=1kb)	23610858	23612864	2007	+	LOC_Os11g39640	881	sp|Q9LX93|ATL55_ARATH E3 ubiquitin-protein ligase RING1 OS=Arabidopsis thaliana GN=ATL55 PE=1 SV=1//8.09017e-21
Chr11	23722142	23722525	384	Promoter (2-3kb)	23713955	23719907	5953	-	LOC_Os11g39790	-2235	sp|P0CT39|TF26_SCHPO Transposon Tf2-6 polyprotein OS=Schizosaccharomyces pombe (strain 972 / ATCC 24843) GN=Tf2-6 PE=3 SV=1//1.02112e-125
Chr11	23864888	23865260	373	Promoter (<=1kb)	23866045	23867666	1622	+	LOC_Os11g40030	-785	sp|Q2R185|KRP3_ORYSJ Cyclin-dependent kinase inhibitor 3 OS=Oryza sativa subsp. japonica GN=KRP3 PE=2 SV=2//1.36664e-48
Chr11	23866337	23866532	196	Promoter (<=1kb)	23866060	23867908	1849	+	LOC_Os11g40030	277	sp|Q2R185|KRP3_ORYSJ Cyclin-dependent kinase inhibitor 3 OS=Oryza sativa subsp. japonica GN=KRP3 PE=2 SV=2//1.36664e-48
Chr11	24000144	24000671	528	Promoter (<=1kb)	23997972	23999357	1386	-	LOC_Os11g40230	-787	sp|Q94CD1|HHT1_ARATH Omega-hydroxypalmitate O-feruloyl transferase OS=Arabidopsis thaliana GN=HHT1 PE=1 SV=1//1.78536e-23
Chr11	24192756	24193003	248	Promoter (<=1kb)	24192113	24195295	3183	+	LOC_Os11g40550	643	sp|Q9M1L7|PRK3_ARATH Pollen receptor-like kinase 3 OS=Arabidopsis thaliana GN=PRK3 PE=1 SV=1//2.00121e-12
Chr11	24754632	24754845	214	Promoter (1-2kb)	24756166	24757242	1077	+	LOC_Os11g41300	-1321	sp|Q9M8J9|BPM2_ARATH BTB/POZ and MATH domain-containing protein 2 OS=Arabidopsis thaliana GN=BPM2 PE=1 SV=1//3.17785e-62
Chr11	25021739	25021934	196	Promoter (<=1kb)	25021621	25023695	2075	+	LOC_Os11g41680	118	sp|O48923|C71DA_SOYBN Cytochrome P450 71D10 OS=Glycine max GN=CYP71D10 PE=2 SV=1//4.57967e-118
Chr11	25022267	25022480	214	Promoter (<=1kb)	25021621	25023695	2075	+	LOC_Os11g41680	646	sp|O48923|C71DA_SOYBN Cytochrome P450 71D10 OS=Glycine max GN=CYP71D10 PE=2 SV=1//4.57967e-118
Chr11	25175973	25176168	196	Promoter (<=1kb)	25175014	25176821	1808	-	LOC_Os11g41870	653	sp|Q8VZ80|PLT5_ARATH Polyol transporter 5 OS=Arabidopsis thaliana GN=PLT5 PE=1 SV=2//1.79521e-129
Chr11	25210466	25210699	234	Promoter (2-3kb)	25212874	25216758	3885	+	LOC_Os11g41910	-2175	sp|Q8YZH7|DER_NOSS1 GTPase Der OS=Nostoc sp. (strain PCC 7120 / UTEX 2576) GN=der PE=3 SV=1//1.24781e-09
Chr11	25252240	25252579	340	Promoter (<=1kb)	25245782	25252767	6986	-	LOC_Os11g41990	188	sp|Q2KI54|ARMC8_BOVIN Armadillo repeat-containing protein 8 OS=Bos taurus GN=ARMC8 PE=2 SV=1//3.2763e-26
Chr11	25318500	25318695	196	Promoter (<=1kb)	25315869	25318082	2214	-	LOC_Os11g42060	-418	sp|Q38834|R13L4_ARATH Disease resistance RPP13-like protein 4 OS=Arabidopsis thaliana GN=RPP13L4 PE=1 SV=2//1.26572e-30
Chr11	25318802	25319248	447	Promoter (<=1kb)	25315869	25318082	2214	-	LOC_Os11g42060	-720	sp|Q38834|R13L4_ARATH Disease resistance RPP13-like protein 4 OS=Arabidopsis thaliana GN=RPP13L4 PE=1 SV=2//1.26572e-30
Chr11	25394154	25394429	276	Promoter (<=1kb)	25394171	25399304	5134	+	LOC_Os11g42160	0	sp|Q9C5D2|FBL4_ARATH F-box/LRR-repeat protein 4 OS=Arabidopsis thaliana GN=FBL4 PE=2 SV=1//0
Chr11	25553137	25553332	196	Promoter (1-2kb)	25552112	25553555	1444	+	LOC_Os11g42450	1025	sp|Q42371|ERECT_ARATH LRR receptor-like serine/threonine-protein kinase ERECTA OS=Arabidopsis thaliana GN=ERECTA PE=1 SV=1//2.4649e-13
Chr11	25691508	25691835	328	Intron (LOC_Os11g42650.1/LOC_Os11g42650, intron 7 of 7)	25695249	25700023	4775	+	LOC_Os11g42660	-3414	sp|Q38834|R13L4_ARATH Disease resistance RPP13-like protein 4 OS=Arabidopsis thaliana GN=RPP13L4 PE=1 SV=2//5.86761e-10
Chr11	25723704	25724319	616	Promoter (<=1kb)	25724057	25729415	5359	+	LOC_Os11g42710	0	sp|P10978|POLX_TOBAC Retrovirus-related Pol polyprotein from transposon TNT 1-94 OS=Nicotiana tabacum PE=2 SV=1//1.97228e-56
Chr11	25724683	25724890	208	Promoter (<=1kb)	25724057	25729415	5359	+	LOC_Os11g42710	626	sp|P10978|POLX_TOBAC Retrovirus-related Pol polyprotein from transposon TNT 1-94 OS=Nicotiana tabacum PE=2 SV=1//1.97228e-56
Chr11	25846621	25846918	298	Promoter (<=1kb)	25840593	25846990	6398	-	LOC_Os11g42900	72	sp|Q00416|SEN1_YEAST Helicase SEN1 OS=Saccharomyces cerevisiae (strain ATCC 204508 / S288c) GN=SEN1 PE=1 SV=2//2.1321e-26
Chr11	26501709	26502040	332	Promoter (<=1kb)	26501618	26504311	2694	+	LOC_Os11g43890	91	sp|Q9SZQ5|VIP3_ARATH WD repeat-containing protein VIP3 OS=Arabidopsis thaliana GN=VIP3 PE=1 SV=1//6.36722e-146
Chr11	26689821	26690032	212	Promoter (<=1kb)	26689546	26694349	4804	+	LOC_Os11g44190	275	sp|P10978|POLX_TOBAC Retrovirus-related Pol polyprotein from transposon TNT 1-94 OS=Nicotiana tabacum PE=2 SV=1//1.93103e-29
Chr11	27029835	27030030	196	Promoter (<=1kb)	27029845	27034055	4211	+	LOC_Os11g44700	0	sp|C0SV51|CB60C_ARATH Calmodulin-binding protein 60 C OS=Arabidopsis thaliana GN=CBP60C PE=2 SV=1//1.43391e-14
Chr11	27199788	27199983	196	Promoter (<=1kb)	27198382	27199929	1548	-	LOC_Os11g44930	0	sp|O80488|PPR23_ARATH Pentatricopeptide repeat-containing protein At1g09190 OS=Arabidopsis thaliana GN=PCMP-E70 PE=2 SV=1//6.59304e-90
Chr11	27399922	27400117	196	Promoter (<=1kb)	27399798	27406608	6811	+	LOC_Os11g45280	124	sp|Q54TM7|DRKD_DICDI Probable serine/threonine-protein kinase drkD OS=Dictyostelium discoideum GN=drkD PE=2 SV=1//5.20482e-52
Chr11	27854146	27854464	319	Promoter (<=1kb)	27850492	27853464	2973	-	LOC_Os11g46010	-682	sp|P92519|M810_ARATH Uncharacterized mitochondrial protein AtMg00810 OS=Arabidopsis thaliana GN=AtMg00810 PE=4 SV=1//5.40788e-67
Chr11	28441870	28442262	393	Promoter (2-3kb)	28444371	28447804	3434	+	LOC_Os11g47300	-2109	sp|Q9FL28|FLS2_ARATH LRR receptor-like serine/threonine-protein kinase FLS2 OS=Arabidopsis thaliana GN=FLS2 PE=1 SV=1//1.35352e-164
Chr11	28781385	28781580	196	Promoter (<=1kb)	28781161	28782202	1042	+	LOC_Os11g47670	224	sp|Q41350|OLP1_SOLLC Osmotin-like protein OS=Solanum lycopersicum PE=1 SV=1//6.35793e-13
Chr11	28783293	28783571	279	Promoter (<=1kb)	28783158	28783992	835	+	LOC_Os11g47680	135	sp|Q41350|OLP1_SOLLC Osmotin-like protein OS=Solanum lycopersicum PE=1 SV=1//1.35948e-18
Chr12	270618	270978	361	Promoter (<=1kb)	267657	270166	2510	-	LOC_Os12g01430	-452	sp|A4FV84|MRT4_BOVIN mRNA turnover protein 4 homolog OS=Bos taurus GN=MRTO4 PE=2 SV=1//1.15653e-55
Chr12	578665	578860	196	Promoter (<=1kb)	577960	579223	1264	-	LOC_Os12g01970	363	sp|O65451|FB333_ARATH Probable F-box protein At4g22030 OS=Arabidopsis thaliana GN=At4g22030 PE=4 SV=1//7.56703e-20
Chr12	579341	579555	215	Promoter (<=1kb)	577960	579223	1264	-	LOC_Os12g01970	-118	sp|O65451|FB333_ARATH Probable F-box protein At4g22030 OS=Arabidopsis thaliana GN=At4g22030 PE=4 SV=1//7.56703e-20
Chr12	626821	627194	374	Promoter (<=1kb)	627213	627638	426	-	LOC_Os12g02090	444	sp|A2ZMR9|PCF8_ORYSI Transcription factor PCF8 OS=Oryza sativa subsp. indica GN=PCF8 PE=3 SV=1//3.09328e-27
Chr12	627429	627779	351	Promoter (<=1kb)	627213	627638	426	-	LOC_Os12g02090	0	sp|A2ZMR9|PCF8_ORYSI Transcription factor PCF8 OS=Oryza sativa subsp. indica GN=PCF8 PE=3 SV=1//3.09328e-27
Chr12	812188	812383	196	Promoter (<=1kb)	812339	812716	378	+	LOC_Os12g02430	0	sp|P81393|MYB08_ANTMA Myb-related protein 308 OS=Antirrhinum majus GN=MYB308 PE=2 SV=1//1.82437e-26
Chr12	832115	832419	305	Promoter (<=1kb)	829515	831650	2136	-	LOC_Os12g02460	-465	sp|B9FJG3|RSLE1_ORYSJ Zinc finger BED domain-containing protein RICESLEEPER 1 OS=Oryza sativa subsp. japonica GN=Os05g0239150 PE=3 SV=1//2.0239e-17
Chr12	893105	893416	312	Promoter (1-2kb)	894710	898452	3743	+	LOC_Os12g02589	-1294	sp|Q8H569|AKT3_ORYSJ Potassium channel AKT3 OS=Oryza sativa subsp. japonica GN=Os07g0175400 PE=3 SV=1//1.05136e-27
Chr12	1044320	1044601	282	Promoter (<=1kb)	1043533	1047118	3586	+	LOC_Os12g02870	787	sp|Q2QYF3|SCR2_ORYSJ Protein SCARECROW 2 OS=Oryza sativa subsp. japonica GN=SCR2 PE=2 SV=1//0
Chr12	1275625	1275821	197	Promoter (<=1kb)	1276104	1280591	4488	+	LOC_Os12g03304	-283	sp|P10978|POLX_TOBAC Retrovirus-related Pol polyprotein from transposon TNT 1-94 OS=Nicotiana tabacum PE=2 SV=1//8.11362e-69
Chr12	1496390	1496585	196	Promoter (<=1kb)	1497364	1499413	2050	+	LOC_Os12g03710	-779	sp|Q5ZLR4|ESRP2_CHICK Epithelial splicing regulatory protein 2 OS=Gallus gallus GN=ESRP2 PE=2 SV=1//5.01558e-07
Chr12	1733001	1733213	213	Promoter (<=1kb)	1732195	1734982	2788	+	LOC_Os12g04130	806	sp|Q6NPN5|FK113_ARATH F-box/kelch-repeat protein At5g26960 OS=Arabidopsis thaliana GN=At5g26960 PE=2 SV=1//2.88405e-46
Chr12	1738359	1738813	455	Promoter (<=1kb)	1739762	1740849	1088	+	LOC_Os12g04140	-949	sp|Q9LFR7|CXE17_ARATH Probable carboxylesterase 17 OS=Arabidopsis thaliana GN=CXE17 PE=2 SV=1//1.52597e-21
Chr12	1781529	1781724	196	Promoter (1-2kb)	1783575	1789565	5991	+	LOC_Os12g04220	-1851	sp|Q2QY12|ACA4_ORYSJ Probable calcium-transporting ATPase 4, plasma membrane-type OS=Oryza sativa subsp. japonica GN=Os12g0136900 PE=3 SV=1//0
Chr12	1898971	1899166	196	Promoter (<=1kb)	1899904	1900590	687	+	LOC_Os12g04460	-738	sp|Q6GPV5|RN181_XENLA E3 ubiquitin-protein ligase RNF181 OS=Xenopus laevis GN=rnf181 PE=2 SV=1//3.2375e-15
Chr12	1966524	1966787	264	Promoter (<=1kb)	1966080	1967647	1568	+	LOC_Os12g04640	444	sp|Q41144|STC_RICCO Sugar carrier protein C OS=Ricinus communis GN=STC PE=2 SV=1//2.6435e-57
Chr12	2629270	2629533	264	Promoter (<=1kb)	2629446	2632697	3252	+	LOC_Os12g05700	0	sp|Q9SSQ4|FRS6_ARATH Protein FAR1-RELATED SEQUENCE 6 OS=Arabidopsis thaliana GN=FRS6 PE=2 SV=1//6.20681e-07
Chr12	2784549	2784744	196	Promoter (<=1kb)	2784262	2785440	1179	-	LOC_Os12g06030	696	sp|Q9SIH5|FB322_ARATH Probable F-box protein At1g60180 OS=Arabidopsis thaliana GN=At2g36090 PE=2 SV=1//5.53569e-27
Chr12	3033232	3033652	421	Promoter (<=1kb)	3029596	3034173	4578	-	LOC_Os12g06340	521	sp|Q9SJ56|BLH1_ARATH BEL1-like homeodomain protein 1 OS=Arabidopsis thaliana GN=BLH1 PE=1 SV=1//5.42212e-62
Chr12	3069420	3069979	560	Promoter (<=1kb)	3068759	3070072	1314	+	LOC_Os12g06410	661	sp|Q84TG3|PUB23_ARATH E3 ubiquitin-protein ligase PUB23 OS=Arabidopsis thaliana GN=PUB23 PE=1 SV=1//4.59465e-08
Chr12	3317792	3318036	245	Promoter (1-2kb)	3309114	3316494	7381	-	LOC_Os12g06810	-1298	sp|Q8BH57|WDR48_MOUSE WD repeat-containing protein 48 OS=Mus musculus GN=Wdr48 PE=1 SV=1//1.61227e-126
Chr12	3401883	3402186	304	Promoter (<=1kb)	3401892	3402311	420	-	LOC_Os12g06970	125	sp|Q9SJ23|EC13_ARATH Egg cell-secreted protein 1.3 OS=Arabidopsis thaliana GN=EC1.3 PE=2 SV=1//3.25493e-25
Chr12	3496791	3496986	196	Promoter (<=1kb)	3496286	3497437	1152	+	LOC_Os12g07120	505	sp|Q6DBP8|GAT11_ARATH GATA transcription factor 11 OS=Arabidopsis thaliana GN=GATA11 PE=2 SV=1//6.52057e-07
Chr12	3536230	3536425	196	Promoter (<=1kb)	3531359	3536426	5068	-	LOC_Os12g07190	1	sp|Q9LF97|Y3295_ARATH CBS domain-containing protein CBSCBSPB3 OS=Arabidopsis thaliana GN=CBSCBSPB3 PE=1 SV=1//0
Chr12	3538534	3538791	258	Promoter (<=1kb)	3538614	3539139	526	+	LOC_Os12g07200	0	sp|Q9STM3|REF6_ARATH Lysine-specific demethylase REF6 OS=Arabidopsis thaliana GN=REF6 PE=1 SV=1//3.47526e-15
Chr12	3539191	3539386	196	Promoter (<=1kb)	3538614	3539139	526	+	LOC_Os12g07200	577	sp|Q9STM3|REF6_ARATH Lysine-specific demethylase REF6 OS=Arabidopsis thaliana GN=REF6 PE=1 SV=1//3.47526e-15
Chr12	3753545	3753886	342	Promoter (<=1kb)	3753428	3758551	5124	+	LOC_Os12g07540	117	sp|Q8W486|Y1491_ARATH Uncharacterized protein At1g04910 OS=Arabidopsis thaliana GN=At1g04910 PE=2 SV=1//5.02946e-73
Chr12	3892943	3893309	367	Promoter (<=1kb)	3893615	3898333	4719	+	LOC_Os12g07750	-306	sp|P0CT40|TF29_SCHPO Transposon Tf2-9 polyprotein OS=Schizosaccharomyces pombe (strain 972 / ATCC 24843) GN=Tf2-9 PE=3 SV=1//2.49102e-144
Chr12	4088889	4089106	218	Promoter (1-2kb)	4089710	4090174	465	-	LOC_Os12g08040	1068	sp|P0CT43|TF28_SCHPO Transposon Tf2-8 polyprotein OS=Schizosaccharomyces pombe (strain 972 / ATCC 24843) GN=Tf2-8 PE=3 SV=1//1.19713e-19
Chr12	4162975	4163275	301	Promoter (<=1kb)	4163633	4168252	4620	+	LOC_Os12g08140	-358	sp|P93011|PP182_ARATH Pentatricopeptide repeat-containing protein At2g33760 OS=Arabidopsis thaliana GN=PCMP-H6 PE=3 SV=1//0
Chr12	4494062	4494307	246	Distal Intergenic	4499736	4503990	4255	+	LOC_Os12g08760	-5429	sp|O49290|CPPM_ARATH Carboxyvinyl-carboxyphosphonate phosphorylmutase, chloroplastic OS=Arabidopsis thaliana GN=At1g77060 PE=2 SV=2//1.19393e-136
Chr12	4634093	4634290	198	Distal Intergenic	4642210	4647010	4801	+	LOC_Os12g08900	-7920	sp|Q8NXH0|CSD_STAAW Probable cysteine desulfurase OS=Staphylococcus aureus (strain MW2) GN=csd PE=3 SV=1//5.07141e-22
Chr12	4849445	4849676	232	Promoter (<=1kb)	4848847	4859757	10911	+	LOC_Os12g09250	598	sp|Q9M2K4|BZP61_ARATH Basic leucine zipper 61 OS=Arabidopsis thaliana GN=BZIP61 PE=1 SV=1//3.58154e-18
Chr12	4987140	4987420	281	Promoter (<=1kb)	4984225	4988325	4101	-	LOC_Os12g09500	905	sp|O64637|C76C2_ARATH Cytochrome P450 76C2 OS=Arabidopsis thaliana GN=CYP76C2 PE=2 SV=1//1.43668e-99
Chr12	4990635	4990943	309	Promoter (2-3kb)	4984225	4988325	4101	-	LOC_Os12g09500	-2310	sp|O64637|C76C2_ARATH Cytochrome P450 76C2 OS=Arabidopsis thaliana GN=CYP76C2 PE=2 SV=1//1.43668e-99
Chr12	5315954	5316149	196	Promoter (<=1kb)	5311684	5316032	4349	-	LOC_Os12g10030	0	sp|P04146|COPIA_DROME Copia protein OS=Drosophila melanogaster GN=GIP PE=1 SV=3//1.32552e-22
Chr12	5565448	5565643	196	Promoter (<=1kb)	5560595	5564941	4347	-	LOC_Os12g10500	-507	sp|P10978|POLX_TOBAC Retrovirus-related Pol polyprotein from transposon TNT 1-94 OS=Nicotiana tabacum PE=2 SV=1//0
Chr12	5991292	5991592	301	Distal Intergenic	5995041	5997632	2592	+	LOC_Os12g11130	-3449	sp|P0CT40|TF29_SCHPO Transposon Tf2-9 polyprotein OS=Schizosaccharomyces pombe (strain 972 / ATCC 24843) GN=Tf2-9 PE=3 SV=1//1.12917e-16
Chr12	6600079	6600413	335	Promoter (1-2kb)	6596168	6598694	2527	-	LOC_Os12g12040	-1385	sp|P10978|POLX_TOBAC Retrovirus-related Pol polyprotein from transposon TNT 1-94 OS=Nicotiana tabacum PE=2 SV=1//2.2843e-81
Chr12	6806535	6806772	238	Promoter (<=1kb)	6799196	6806977	7782	-	LOC_Os12g12360	205	sp|O80567|LRP6B_ARATH La-related protein 6B OS=Arabidopsis thaliana GN=LARP6B PE=1 SV=2//8.45518e-82
Chr12	6811291	6811486	196	Promoter (<=1kb)	6811218	6814994	3777	+	LOC_Os12g12370	73	sp|O80565|OEP37_ARATH Outer envelope pore protein 37, chloroplastic OS=Arabidopsis thaliana GN=OEP37 PE=2 SV=2//1.86928e-81
Chr12	6957824	6958065	242	Promoter (<=1kb)	6956284	6957558	1275	-	LOC_Os12g12620	-266	sp|P10978|POLX_TOBAC Retrovirus-related Pol polyprotein from transposon TNT 1-94 OS=Nicotiana tabacum PE=2 SV=1//6.02689e-58
Chr12	8326983	8327250	268	Promoter (<=1kb)	8327857	8329559	1703	+	LOC_Os12g14580	-607	sp|Q9M1E7|TET3_ARATH Tetraspanin-3 OS=Arabidopsis thaliana GN=TET3 PE=2 SV=1//5.41907e-30
Chr12	8826803	8827114	312	Promoter (<=1kb)	8823315	8827128	3814	-	LOC_Os12g15460	14	sp|Q0WN60|PPR48_ARATH Pentatricopeptide repeat-containing protein At1g18485 OS=Arabidopsis thaliana GN=PCMP-H8 PE=2 SV=2//8.74296e-57
Chr12	8834166	8834609	444	Promoter (<=1kb)	8829523	8834630	5108	-	LOC_Os12g15470	21	sp|P37890|CBP1_ORYSJ Serine carboxypeptidase 1 OS=Oryza sativa subsp. japonica GN=CBP1 PE=2 SV=1//0
Chr12	8916121	8916543	423	Promoter (<=1kb)	8915565	8916450	886	-	LOC_Os12g15600	0	sp|Q9LFX9|PTR13_ARATH Protein NRT1/ PTR FAMILY 2.12 OS=Arabidopsis thaliana GN=NPF2.12 PE=1 SV=2//2.58399e-14
Chr12	8957831	8958026	196	Promoter (<=1kb)	8950087	8957773	7687	-	LOC_Os12g15670	-58	sp|P10978|POLX_TOBAC Retrovirus-related Pol polyprotein from transposon TNT 1-94 OS=Nicotiana tabacum PE=2 SV=1//2.47581e-42
Chr12	9209700	9209916	217	Promoter (<=1kb)	9209562	9211666	2105	+	LOC_Os12g16130	138	sp|P08770|TRA1_MAIZE Putative AC transposase OS=Zea mays PE=2 SV=2//1.73663e-35
Chr12	9285802	9286208	407	Promoter (<=1kb)	9285017	9285334	318	+	LOC_Os12g16230	785	sp|Q9SSE8|GLYT1_ARATH Probable glycosyltransferase At3g07620 OS=Arabidopsis thaliana GN=At3g07620 PE=3 SV=1//4.97114e-14
Chr12	9322740	9323077	338	Promoter (<=1kb)	9322144	9322516	373	+	LOC_Os12g16300	596	sp|Q8LBB2|KING1_ARATH SNF1-related protein kinase regulatory subunit gamma-1 OS=Arabidopsis thaliana GN=KING1 PE=1 SV=2//1.59704e-11
Chr12	9352553	9352970	418	Promoter (<=1kb)	9352901	9365584	12684	+	LOC_Os12g16350	0	sp|Q9LKJ1|HIBC1_ARATH 3-hydroxyisobutyryl-CoA hydrolase 1 OS=Arabidopsis thaliana GN=CHY1 PE=1 SV=1//6.29797e-123
Chr12	9417637	9418046	410	Promoter (<=1kb)	9418174	9423600	5427	+	LOC_Os12g16450	-128	sp|P04323|POL3_DROME Retrovirus-related Pol polyprotein from transposon 17.6 OS=Drosophila melanogaster GN=pol PE=3 SV=1//2.78265e-23
Chr12	9418592	9418816	225	Promoter (<=1kb)	9418174	9423600	5427	+	LOC_Os12g16450	418	sp|P04323|POL3_DROME Retrovirus-related Pol polyprotein from transposon 17.6 OS=Drosophila melanogaster GN=pol PE=3 SV=1//2.78265e-23
Chr12	9732589	9732979	391	Promoter (<=1kb)	9733273	9734352	1080	+	LOC_Os12g17010	-294	sp|P20698|PRO28_ORYSJ Prolamin PPROL 17D OS=Oryza sativa subsp. japonica GN=Os12g0269200 PE=2 SV=2//2.74668e-34
Chr12	9810994	9811189	196	Promoter (1-2kb)	9809174	9812470	3297	-	LOC_Os12g17140	1281	sp|B7EIH2|Y3643_ORYSJ B3 domain-containing protein Os03g0164300 OS=Oryza sativa subsp. japonica GN=Os03g0164300 PE=3 SV=1//3.28127e-20
Chr12	9836269	9836499	231	Promoter (<=1kb)	9837199	9839631	2433	+	LOC_Os12g17180	-700	sp|Q7LHG5|YI31B_YEAST Transposon Ty3-I Gag-Pol polyprotein OS=Saccharomyces cerevisiae (strain ATCC 204508 / S288c) GN=TY3B-I PE=3 SV=2//1.49563e-07
Chr12	9887232	9887662	431	Promoter (<=1kb)	9888115	9900738	12624	+	LOC_Os12g17290	-453	sp|P20825|POL2_DROME Retrovirus-related Pol polyprotein from transposon 297 OS=Drosophila melanogaster GN=pol PE=3 SV=1//7.55035e-32
Chr12	9887789	9888092	304	Promoter (<=1kb)	9888115	9900738	12624	+	LOC_Os12g17290	-23	sp|P20825|POL2_DROME Retrovirus-related Pol polyprotein from transposon 297 OS=Drosophila melanogaster GN=pol PE=3 SV=1//7.55035e-32
Chr12	10232296	10232491	196	Promoter (<=1kb)	10232718	10234460	1743	+	LOC_Os12g17850	-227	sp|Q99315|YG31B_YEAST Transposon Ty3-G Gag-Pol polyprotein OS=Saccharomyces cerevisiae (strain ATCC 204508 / S288c) GN=TY3B-G PE=1 SV=3//1.04082e-30
Chr12	10458988	10459183	196	Promoter (<=1kb)	10458960	10466192	7233	+	LOC_Os12g18140	28	sp|P42285|SK2L2_HUMAN Superkiller viralicidic activity 2-like 2 OS=Homo sapiens GN=SKIV2L2 PE=1 SV=3//0
Chr12	10494737	10494932	196	Promoter (<=1kb)	10494303	10504489	10187	+	LOC_Os12g18190	434	sp|P10978|POLX_TOBAC Retrovirus-related Pol polyprotein from transposon TNT 1-94 OS=Nicotiana tabacum PE=2 SV=1//8.20814e-12
Chr12	10624316	10624526	211	Promoter (<=1kb)	10624040	10635373	11334	+	LOC_Os12g18374	276	sp|Q9M667|RPP13_ARATH Disease resistance protein RPP13 OS=Arabidopsis thaliana GN=RPP13 PE=2 SV=2//3.40105e-29
Chr12	10718526	10718721	196	Promoter (<=1kb)	10719090	10721270	2181	+	LOC_Os12g18540	-369	sp|P08770|TRA1_MAIZE Putative AC transposase OS=Zea mays PE=2 SV=2//8.69949e-15
Chr12	10762930	10763132	203	Promoter (<=1kb)	10756636	10762855	6220	-	LOC_Os12g18630	-75	sp|Q9FGP9|RER1_ARATH Protein RETICULATA-RELATED 1 OS=Arabidopsis thaliana GN=RER1 PE=2 SV=1//5.62387e-19
Chr12	11056363	11056811	449	Promoter (<=1kb)	11045695	11057114	11420	-	LOC_Os12g19030	303	sp|Q9LY87|RGLG2_ARATH E3 ubiquitin-protein ligase RGLG2 OS=Arabidopsis thaliana GN=RGLG2 PE=1 SV=1//0
Chr12	11377180	11377416	237	Promoter (1-2kb)	11362596	11378749	16154	-	LOC_Os12g19549	1333	sp|Q8LKW0|TERT_ORYSJ Telomerase reverse transcriptase OS=Oryza sativa subsp. japonica GN=TERT PE=2 SV=2//0
Chr12	11518870	11519127	258	Promoter (<=1kb)	11511514	11518861	7348	-	LOC_Os12g19760	-9	sp|P10978|POLX_TOBAC Retrovirus-related Pol polyprotein from transposon TNT 1-94 OS=Nicotiana tabacum PE=2 SV=1//0
Chr12	11598625	11598820	196	Promoter (2-3kb)	11589934	11596598	6665	-	LOC_Os12g19900	-2027	sp|Q9UR07|TF211_SCHPO Transposon Tf2-11 polyprotein OS=Schizosaccharomyces pombe (strain 972 / ATCC 24843) GN=Tf2-11 PE=3 SV=1//3.90849e-115
Chr12	12220363	12220719	357	Promoter (<=1kb)	12215036	12220997	5962	-	LOC_Os12g21730	278	sp|Q7LHG5|YI31B_YEAST Transposon Ty3-I Gag-Pol polyprotein OS=Saccharomyces cerevisiae (strain ATCC 204508 / S288c) GN=TY3B-I PE=3 SV=2//1.44678e-08
Chr12	12439682	12439877	196	Promoter (1-2kb)	12433463	12440898	7436	-	LOC_Os12g22110	1021	sp|Q8RXN0|AB11G_ARATH ABC transporter G family member 11 OS=Arabidopsis thaliana GN=ABCG11 PE=1 SV=1//1.32465e-159
Chr12	12534360	12534593	234	Promoter (<=1kb)	12532812	12535120	2309	-	LOC_Os12g22240	527	sp|P27401|POL_SFV3L Pro-Pol polyprotein OS=Simian foamy virus type 3 (strain LK3) GN=pol PE=3 SV=2//3.17961e-16
Chr12	12600434	12600665	232	Promoter (<=1kb)	12601466	12608266	6801	+	LOC_Os12g22320	-801	sp|P0CT40|TF29_SCHPO Transposon Tf2-9 polyprotein OS=Schizosaccharomyces pombe (strain 972 / ATCC 24843) GN=Tf2-9 PE=3 SV=1//3.56239e-55
Chr12	12654578	12654816	239	Promoter (<=1kb)	12652662	12653927	1266	-	LOC_Os12g22410	-651	sp|P23074|POL_SFV1 Pro-Pol polyprotein OS=Simian foamy virus type 1 GN=pol PE=1 SV=3//2.37855e-17
Chr12	13068923	13069155	233	Promoter (<=1kb)	13065330	13068979	3650	-	LOC_Os12g23110	0	sp|P04323|POL3_DROME Retrovirus-related Pol polyprotein from transposon 17.6 OS=Drosophila melanogaster GN=pol PE=3 SV=1//4.04065e-40
Chr12	13069669	13069864	196	Promoter (<=1kb)	13065330	13068979	3650	-	LOC_Os12g23110	-690	sp|P04323|POL3_DROME Retrovirus-related Pol polyprotein from transposon 17.6 OS=Drosophila melanogaster GN=pol PE=3 SV=1//4.04065e-40
Chr12	13261632	13261960	329	Promoter (<=1kb)	13254103	13260690	6588	-	LOC_Os12g23440	-942	sp|P0CT39|TF26_SCHPO Transposon Tf2-6 polyprotein OS=Schizosaccharomyces pombe (strain 972 / ATCC 24843) GN=Tf2-6 PE=3 SV=1//1.26665e-143
Chr12	13501146	13501341	196	Promoter (<=1kb)	13501144	13505079	3936	+	LOC_Os12g23770	2	sp|P11369|LORF2_MOUSE LINE-1 retrotransposable element ORF2 protein OS=Mus musculus GN=Pol PE=1 SV=2//2.79349e-38
Chr12	14009983	14010301	319	Promoter (<=1kb)	14010016	14010654	639	-	LOC_Os12g24530	353	sp|Q9SLC3|ATL41_ARATH E3 ubiquitin-protein ligase ATL41 OS=Arabidopsis thaliana GN=ATL41 PE=1 SV=1//1.6973e-14
Chr12	14373734	14373950	217	Promoter (<=1kb)	14366170	14374499	8330	-	LOC_Os12g25040	549	sp|P0CT43|TF28_SCHPO Transposon Tf2-8 polyprotein OS=Schizosaccharomyces pombe (strain 972 / ATCC 24843) GN=Tf2-8 PE=3 SV=1//2.99695e-14
Chr12	14374330	14374671	342	Promoter (<=1kb)	14366170	14374499	8330	-	LOC_Os12g25040	0	sp|P0CT43|TF28_SCHPO Transposon Tf2-8 polyprotein OS=Schizosaccharomyces pombe (strain 972 / ATCC 24843) GN=Tf2-8 PE=3 SV=1//2.99695e-14
Chr12	14426305	14426500	196	Promoter (1-2kb)	14423595	14424893	1299	-	LOC_Os12g25120	-1412	sp|Q2QS71|H2A7_ORYSJ Probable histone H2A.7 OS=Oryza sativa subsp. japonica GN=Os12g0438000 PE=2 SV=1//4.56377e-56
Chr12	14504226	14504908	683	Promoter (<=1kb)	14503331	14503903	573	-	LOC_Os12g25210	-323	sp|Q944J0|SPCS1_ARATH Probable signal peptidase complex subunit 1 OS=Arabidopsis thaliana GN=At2g22425 PE=2 SV=1//9.78342e-29
Chr12	14806867	14807074	208	Promoter (2-3kb)	14800008	14804552	4545	-	LOC_Os12g25580	-2315	sp|Q8I7P9|POL5_DROME Retrovirus-related Pol polyprotein from transposon opus OS=Drosophila melanogaster GN=pol PE=3 SV=1//5.60609e-22
Chr12	14883251	14883456	206	Promoter (<=1kb)	14883197	14885538	2342	+	LOC_Os12g25680	54	sp|P05994|PAPA4_CARPA Papaya proteinase 4 OS=Carica papaya PE=1 SV=3//7.39593e-23
Chr12	15549358	15549597	240	Promoter (<=1kb)	15547279	15549926	2648	-	LOC_Os12g26570	329	sp|P04146|COPIA_DROME Copia protein OS=Drosophila melanogaster GN=GIP PE=1 SV=3//4.9434e-85
Chr12	15549768	15550110	343	Promoter (<=1kb)	15547279	15549926	2648	-	LOC_Os12g26570	0	sp|P04146|COPIA_DROME Copia protein OS=Drosophila melanogaster GN=GIP PE=1 SV=3//4.9434e-85
Chr12	15611998	15612241	244	Promoter (<=1kb)	15611588	15614236	2649	+	LOC_Os12g26650	410	sp|P04146|COPIA_DROME Copia protein OS=Drosophila melanogaster GN=GIP PE=1 SV=3//4.43653e-87
Chr12	15704347	15704655	309	Promoter (<=1kb)	15704052	15705912	1861	+	LOC_Os12g26810	295	sp|P0CT40|TF29_SCHPO Transposon Tf2-9 polyprotein OS=Schizosaccharomyces pombe (strain 972 / ATCC 24843) GN=Tf2-9 PE=3 SV=1//2.18516e-11
Chr12	15839955	15840365	411	Promoter (<=1kb)	15837675	15840247	2573	-	LOC_Os12g27050	0	sp|P10978|POLX_TOBAC Retrovirus-related Pol polyprotein from transposon TNT 1-94 OS=Nicotiana tabacum PE=2 SV=1//1.41472e-82
Chr12	15858107	15858307	201	Promoter (<=1kb)	15857979	15866742	8764	+	LOC_Os12g27090	128	sp|Q9CAF4|NUP1_ARATH Nuclear pore complex protein NUP1 OS=Arabidopsis thaliana GN=NUP1 PE=1 SV=1//1.24479e-17
Chr12	16083491	16083776	286	Promoter (1-2kb)	16078545	16082055	3511	-	LOC_Os12g27350	-1436	sp|Q8GT20|BEBT_TOBAC Benzyl alcohol O-benzoyltransferase OS=Nicotiana tabacum GN=HSR201 PE=1 SV=1//3.17358e-91
Chr12	16437028	16437324	297	Promoter (2-3kb)	16430118	16434796	4679	-	LOC_Os12g27870	-2232	sp|P0CT39|TF26_SCHPO Transposon Tf2-6 polyprotein OS=Schizosaccharomyces pombe (strain 972 / ATCC 24843) GN=Tf2-6 PE=3 SV=1//3.40971e-125
Chr12	17391843	17392261	419	Promoter (<=1kb)	17391342	17392732	1391	+	LOC_Os12g29330	501	sp|Q9FY93|NAC83_ARATH NAC domain-containing protein 83 OS=Arabidopsis thaliana GN=NAC083 PE=1 SV=1//2.60426e-45
Chr12	17666052	17666305	254	Promoter (<=1kb)	17661454	17665772	4319	-	LOC_Os12g29610	-280	sp|Q05091|PGIP_PYRCO Polygalacturonase inhibitor OS=Pyrus communis GN=PGIP PE=1 SV=1//1.11295e-16
Chr12	17791536	17791846	311	Promoter (<=1kb)	17788672	17791111	2440	-	LOC_Os12g29760	-425	sp|O81884|GALDH_ARATH L-galactose dehydrogenase OS=Arabidopsis thaliana GN=LGALDH PE=1 SV=1//2.58816e-164
Chr12	18308501	18308886	386	Promoter (<=1kb)	18308207	18310486	2280	+	LOC_Os12g30500	294	sp|Q9FG14|MYOB7_ARATH Myosin-binding protein 7 OS=Arabidopsis thaliana GN=MYOB7 PE=1 SV=1//9.41916e-07
Chr12	18388159	18388371	213	Promoter (<=1kb)	18388480	18391056	2577	+	LOC_Os12g30620	-109	sp|Q9LS72|PP261_ARATH Pentatricopeptide repeat-containing protein At3g29230 OS=Arabidopsis thaliana GN=PCMP-E27 PE=2 SV=1//1.60184e-14
Chr12	18681901	18682245	345	Promoter (<=1kb)	18680908	18681471	564	-	LOC_Os12g31080	-430	sp|Q7XPY5|BGL15_ORYSJ Putative beta-glucosidase 15 OS=Oryza sativa subsp. japonica GN=BGLU15 PE=5 SV=2//2.01978e-07
Chr12	19440715	19440923	209	Promoter (<=1kb)	19440718	19443701	2984	+	LOC_Os12g32210	0	sp|Q8VZ52|ATG10_ARATH Ubiquitin-like-conjugating enzyme ATG10 OS=Arabidopsis thaliana GN=ATG10 PE=1 SV=1//4.31248e-36
Chr12	19473573	19474044	472	Promoter (<=1kb)	19473728	19478606	4879	+	LOC_Os12g32250	0	sp|Q9ZQ70|WRKY3_ARATH Probable WRKY transcription factor 3 OS=Arabidopsis thaliana GN=WRKY3 PE=2 SV=1//1.34859e-99
Chr12	19687360	19687770	411	Promoter (<=1kb)	19684832	19687895	3064	-	LOC_Os12g32630	125	sp|Q84WW1|FB140_ARATH F-box protein At3g12350 OS=Arabidopsis thaliana GN=At3g12350 PE=2 SV=1//5.573e-07
Chr12	19919350	19919545	196	Promoter (1-2kb)	19914307	19917975	3669	-	LOC_Os12g32980	-1375	sp|Q84N38|PVIP_NICBE OBERON-like protein OS=Nicotiana benthamiana GN=PVIP PE=1 SV=1//0
Chr12	20004272	20004615	344	Promoter (<=1kb)	20005372	20008889	3518	+	LOC_Os12g33080	-757	sp|Q9LXV3|DIT1_ARATH Dicarboxylate transporter 1, chloroplastic OS=Arabidopsis thaliana GN=DIT1 PE=1 SV=1//0
Chr12	20019753	20019948	196	Promoter (1-2kb)	20018555	20021302	2748	+	LOC_Os12g33090	1198	sp|Q2QPW2|C3H67_ORYSJ Zinc finger CCCH domain-containing protein 67 OS=Oryza sativa subsp. japonica GN=Os12g0515500 PE=2 SV=1//0
Chr12	20067203	20067398	196	Promoter (<=1kb)	20061564	20066930	5367	-	LOC_Os12g33160	-273	sp|Q39214|RPM1_ARATH Disease resistance protein RPM1 OS=Arabidopsis thaliana GN=RPM1 PE=1 SV=1//5.05161e-58
Chr12	20090018	20090258	241	Distal Intergenic	20093814	20095262	1449	+	LOC_Os12g33220	-3556	sp|Q3EC97|FBL14_ARATH F-box/LRR-repeat protein 14 OS=Arabidopsis thaliana GN=FBL14 PE=2 SV=1//2.32507e-92
Chr12	20257402	20257597	196	Promoter (1-2kb)	20256212	20263378	7167	+	LOC_Os12g33530	1190	sp|Q8I7P9|POL5_DROME Retrovirus-related Pol polyprotein from transposon opus OS=Drosophila melanogaster GN=pol PE=3 SV=1//1.68038e-22
Chr12	20796117	20796433	317	Promoter (<=1kb)	20796047	20798683	2637	+	LOC_Os12g34310	70	sp|Q1PE04|FBL25_ARATH F-box/LRR-repeat protein 25 OS=Arabidopsis thaliana GN=FBL25 PE=2 SV=1//3.99857e-07
Chr12	20908269	20908469	201	Distal Intergenic	20889965	20899619	9655	-	LOC_Os12g34524	-8650	sp|Q9ZV04|PER24_ARATH Peroxidase 24 OS=Arabidopsis thaliana GN=PER24 PE=2 SV=1//4.6713e-76
Chr12	21234805	21235103	299	Promoter (<=1kb)	21230079	21235123	5045	-	LOC_Os12g34874	20	sp|Q9SQT8|DHQSD_ARATH Bifunctional 3-dehydroquinate dehydratase/shikimate dehydrogenase, chloroplastic OS=Arabidopsis thaliana GN=EMB3004 PE=1 SV=1//0
Chr12	21402180	21402800	621	Promoter (1-2kb)	21403471	21404307	837	-	LOC_Os12g35200	1507	sp|P0CT40|TF29_SCHPO Transposon Tf2-9 polyprotein OS=Schizosaccharomyces pombe (strain 972 / ATCC 24843) GN=Tf2-9 PE=3 SV=1//3.49162e-22
Chr12	21648855	21649067	213	Promoter (<=1kb)	21648376	21653570	5195	+	LOC_Os12g35610	479	sp|Q948T9|RBOHB_SOLTU Respiratory burst oxidase homolog protein B OS=Solanum tuberosum GN=RBOHB PE=1 SV=1//0
Chr12	21669181	21669380	200	Promoter (<=1kb)	21666234	21669379	3146	-	LOC_Os12g35640	0	sp|Q2QP53|APRL6_ORYSJ 5&apos;-adenylylsulfate reductase-like 6 OS=Oryza sativa subsp. japonica GN=APRL6 PE=3 SV=1//8.36929e-178
Chr12	21721188	21721402	215	Distal Intergenic	21711240	21713859	2620	-	LOC_Os12g35710	-7329	sp|Q9XIL9|PLRX3_ARATH Pollen-specific leucine-rich repeat extensin-like protein 3 OS=Arabidopsis thaliana GN=PEX3 PE=2 SV=1//2.58801e-143
Chr12	21958057	21958252	196	Promoter (1-2kb)	21952335	21956758	4424	-	LOC_Os12g35930	-1299	sp|P0CT39|TF26_SCHPO Transposon Tf2-6 polyprotein OS=Schizosaccharomyces pombe (strain 972 / ATCC 24843) GN=Tf2-6 PE=3 SV=1//1.35965e-107
Chr12	22182941	22183253	313	Promoter (<=1kb)	22182885	22189908	7024	+	LOC_Os12g36194	56	sp|Q852S5|NDK2_TOBAC Nucleoside diphosphate kinase 2, chloroplastic OS=Nicotiana tabacum GN=NDPK2 PE=1 SV=1//8.10971e-78
Chr12	22212427	22212717	291	Promoter (<=1kb)	22207827	22212185	4359	-	LOC_Os12g36260	-242	sp|P10978|POLX_TOBAC Retrovirus-related Pol polyprotein from transposon TNT 1-94 OS=Nicotiana tabacum PE=2 SV=1//0
Chr12	22448026	22448383	358	Promoter (<=1kb)	22447777	22449274	1498	+	LOC_Os12g36660	249	sp|A1L1P9|S47A1_DANRE Multidrug and toxin extrusion protein 1 OS=Danio rerio GN=slc47a1 PE=2 SV=1//1.62221e-27
Chr12	22457640	22458047	408	Promoter (<=1kb)	22457228	22461984	4757	+	LOC_Os12g36670	412	sp|Q8RWU5|FBL3_ARATH F-box/LRR-repeat protein 3 OS=Arabidopsis thaliana GN=FBL3 PE=2 SV=1//2.24503e-84
Chr12	22727312	22727533	222	Promoter (<=1kb)	22723143	22726843	3701	-	LOC_Os12g37100	-469	sp|Q9LSQ2|PP239_ARATH Putative pentatricopeptide repeat-containing protein At3g16890, mitochondrial OS=Arabidopsis thaliana GN=PPR40 PE=3 SV=1//0
Chr12	22889178	22889462	285	Promoter (2-3kb)	22891686	22897645	5960	+	LOC_Os12g37300	-2224	sp|P0CT39|TF26_SCHPO Transposon Tf2-6 polyprotein OS=Schizosaccharomyces pombe (strain 972 / ATCC 24843) GN=Tf2-6 PE=3 SV=1//6.44602e-150
Chr12	23040924	23041444	521	Promoter (<=1kb)	23042111	23045067	2957	+	LOC_Os12g37550	-667	sp|Q9SIC9|PP178_ARATH Pentatricopeptide repeat-containing protein At2g31400, chloroplastic OS=Arabidopsis thaliana GN=At2g31400 PE=2 SV=1//1.07866e-12
Chr12	23061404	23061599	196	Promoter (<=1kb)	23061181	23068433	7253	+	LOC_Os12g37570	223	sp|Q9FPR3|EDR1_ARATH Serine/threonine-protein kinase EDR1 OS=Arabidopsis thaliana GN=EDR1 PE=1 SV=1//6.00797e-08
Chr12	23232149	23232400	252	Promoter (<=1kb)	23231780	23239087	7308	+	LOC_Os12g37830	369	sp|Q5SVZ6|ZMYM1_HUMAN Zinc finger MYM-type protein 1 OS=Homo sapiens GN=ZMYM1 PE=2 SV=1//3.02147e-35
Chr12	23318025	23318361	337	Promoter (<=1kb)	23318124	23323753	5630	+	LOC_Os12g37960	0	sp|Q2QNF7|DAPF_ORYSJ Diaminopimelate epimerase, chloroplastic OS=Oryza sativa subsp. japonica GN=DAPF PE=2 SV=1//0
Chr12	23374773	23375049	277	Promoter (2-3kb)	23366529	23372487	5959	-	LOC_Os12g38030	-2286	sp|P0CT39|TF26_SCHPO Transposon Tf2-6 polyprotein OS=Schizosaccharomyces pombe (strain 972 / ATCC 24843) GN=Tf2-6 PE=3 SV=1//2.86249e-147
Chr12	23410212	23410578	367	Promoter (<=1kb)	23410052	23411142	1091	+	LOC_Os12g38120	160	sp|Q41350|OLP1_SOLLC Osmotin-like protein OS=Solanum lycopersicum PE=1 SV=1//3.40742e-26
Chr12	23603145	23603340	196	Promoter (<=1kb)	23602840	23604420	1581	+	LOC_Os12g38450	305	sp|Q8H038|KATAM_ORYSJ Xyloglucan galactosyltransferase KATAMARI1 homolog OS=Oryza sativa subsp. japonica GN=Os03g0144800 PE=2 SV=1//1.14584e-137
Chr12	23703425	23703629	205	Promoter (<=1kb)	23703442	23712907	9466	+	LOC_Os12g38590	0	sp|Q9ZW06|PUM2_ARATH Pumilio homolog 2 OS=Arabidopsis thaliana GN=APUM2 PE=1 SV=1//1.56703e-110
Chr12	23916878	23917145	268	Promoter (<=1kb)	23914965	23916723	1759	-	LOC_Os12g38890	-155	sp|O04376|2A5B_ARATH Serine/threonine protein phosphatase 2A 57 kDa regulatory subunit B&apos; beta isoform OS=Arabidopsis thaliana GN=B&apos;BETA PE=1 SV=1//9.5283e-33
Chr12	24061862	24062272	411	Promoter (1-2kb)	24060616	24064648	4033	+	LOC_Os12g39110	1246	sp|Q9C1X4|YKW3_SCHPO Uncharacterized RING finger protein P32A8.03c OS=Schizosaccharomyces pombe (strain 972 / ATCC 24843) GN=SPAP32A8.03c PE=3 SV=1//6.0611e-09
Chr12	24142653	24142848	196	Promoter (<=1kb)	24142613	24144866	2254	+	LOC_Os12g39210	40	sp|Q2QN26|CCA32_ORYSJ Cyclin-A3-2 OS=Oryza sativa subsp. japonica GN=CYCA3-2 PE=2 SV=1//0
Chr12	24180734	24180989	256	Promoter (2-3kb)	24177262	24178595	1334	-	LOC_Os12g39290	-2139	sp|F4KFC7|MD26C_ARATH Probable mediator of RNA polymerase II transcription subunit 26c OS=Arabidopsis thaliana GN=MED26C PE=1 SV=1//8.54436e-12
Chr12	24191458	24191797	340	Promoter (<=1kb)	24191441	24197634	6194	+	LOC_Os12g39320	17	sp|Q8GUH7|CSCLC_ARATH CSC1-like protein HYP1 OS=Arabidopsis thaliana GN=HYP1 PE=2 SV=1//0
Chr12	24212716	24212912	197	Promoter (<=1kb)	24212538	24215241	2704	+	LOC_Os12g39360	178	sp|Q766C3|NEP1_NEPGR Aspartic proteinase nepenthesin-1 OS=Nepenthes gracilis GN=nep1 PE=1 SV=1//6.88303e-51
Chr12	24237589	24237784	196	Promoter (<=1kb)	24237164	24238781	1618	-	LOC_Os12g39400	997	sp|Q9SSW1|AZF1_ARATH Zinc finger protein AZF1 OS=Arabidopsis thaliana GN=AZF1 PE=2 SV=1//3.45615e-23
Chr12	24475097	24475422	326	Promoter (<=1kb)	24475096	24477843	2748	+	LOC_Os12g39640	1	sp|Q94DH3|PCL1_ORYSJ Transcription factor PCL1 OS=Oryza sativa subsp. japonica GN=PCL1 PE=2 SV=1//6.40071e-10
Chr12	24718286	24718609	324	Promoter (<=1kb)	24703185	24719302	16118	-	LOC_Os12g39980	693	sp|Q27IK6|POK2_ARATH Phragmoplast orienting kinesin 2 OS=Arabidopsis thaliana GN=POK2 PE=2 SV=1//0
Chr12	24723753	24724064	312	Promoter (<=1kb)	24723790	24724587	798	-	LOC_Os12g39990	523	sp|P38564|MNB1A_MAIZE Dof zinc finger protein MNB1A OS=Zea mays GN=MNB1A PE=1 SV=2//1.3684e-25
Chr12	24742742	24743106	365	Promoter (<=1kb)	24742002	24746544	4543	+	LOC_Os12g40010	740	sp|Q16P90|MOCO3_AEDAE Molybdenum cofactor sulfurase 3 OS=Aedes aegypti GN=mal3 PE=3 SV=1//1.68508e-13
Chr12	24750447	24750744	298	Promoter (<=1kb)	24750494	24755039	4546	+	LOC_Os12g40030	0	sp|P0CT39|TF26_SCHPO Transposon Tf2-6 polyprotein OS=Schizosaccharomyces pombe (strain 972 / ATCC 24843) GN=Tf2-6 PE=3 SV=1//4.66712e-06
Chr12	24759690	24759918	229	Promoter (<=1kb)	24760700	24765698	4999	+	LOC_Os12g40050	-782	sp|P04146|COPIA_DROME Copia protein OS=Drosophila melanogaster GN=GIP PE=1 SV=3//7.87517e-103
Chr12	24916353	24916556	204	Promoter (<=1kb)	24915510	24917030	1521	+	LOC_Os12g40260	843	sp|Q8W1K8|MUT11_CHLRE Protein Mut11 OS=Chlamydomonas reinhardtii GN=Mut11 PE=2 SV=1//2.53411e-09
Chr12	24925181	24925470	290	Promoter (<=1kb)	24925191	24943707	18517	+	LOC_Os12g40279	0	sp|Q9FPR3|EDR1_ARATH Serine/threonine-protein kinase EDR1 OS=Arabidopsis thaliana GN=EDR1 PE=1 SV=1//8.48249e-45
Chr12	25018122	25018317	196	Promoter (<=1kb)	25018973	25026462	7490	+	LOC_Os12g40419	-656	sp|Q8RY67|WAKLO_ARATH Wall-associated receptor kinase-like 14 OS=Arabidopsis thaliana GN=WAKL14 PE=2 SV=2//2.32693e-127
Chr12	25035469	25035782	314	Promoter (<=1kb)	25035053	25036501	1449	-	LOC_Os12g40460	719	sp|Q67YI6|ATL65_ARATH RING-H2 finger protein ATL65 OS=Arabidopsis thaliana GN=ATL65 PE=2 SV=2//4.24137e-15
Chr12	25035966	25036245	280	Promoter (<=1kb)	25035053	25036501	1449	-	LOC_Os12g40460	256	sp|Q67YI6|ATL65_ARATH RING-H2 finger protein ATL65 OS=Arabidopsis thaliana GN=ATL65 PE=2 SV=2//4.24137e-15
Chr12	25168563	25168783	221	Promoter (<=1kb)	25169131	25171786	2656	+	LOC_Os12g40650	-348	sp|Q6AZB8|HARB1_DANRE Putative nuclease HARBI1 OS=Danio rerio GN=harbi1 PE=2 SV=1//2.05007e-11
Chr12	25191903	25192301	399	Promoter (<=1kb)	25186539	25192435	5897	-	LOC_Os12g40690	134	sp|Q7LHG5|YI31B_YEAST Transposon Ty3-I Gag-Pol polyprotein OS=Saccharomyces cerevisiae (strain ATCC 204508 / S288c) GN=TY3B-I PE=3 SV=2//7.55305e-07
Chr12	25235190	25235716	527	Promoter (<=1kb)	25236011	25240748	4738	+	LOC_Os12g40770	-295	sp|Q02357|ANK1_MOUSE Ankyrin-1 OS=Mus musculus GN=Ank1 PE=1 SV=2//1.79486e-11
Chr12	25331609	25331804	196	Promoter (<=1kb)	25330650	25336551	5902	+	LOC_Os12g40920	959	sp|Q9FUD3|BZIP9_ARATH Basic leucine zipper 9 OS=Arabidopsis thaliana GN=BZIP9 PE=1 SV=1//6.39676e-13
Chr12	25493395	25493654	260	Promoter (<=1kb)	25487498	25493744	6247	-	LOC_Os12g41140	90	sp|Q8W4K5|VAB_ARATH VAN3-binding protein OS=Arabidopsis thaliana GN=VAB PE=1 SV=1//4.21938e-55
Chr12	25603988	25604233	246	Promoter (<=1kb)	25599454	25603362	3909	-	LOC_Os12g41280	-626	sp|P10978|POLX_TOBAC Retrovirus-related Pol polyprotein from transposon TNT 1-94 OS=Nicotiana tabacum PE=2 SV=1//0
Chr12	25750315	25750510	196	Promoter (<=1kb)	25750917	25751288	372	+	LOC_Os12g41610	-407	sp|Q9LDD1|BRG3_ARATH Probable BOI-related E3 ubiquitin-protein ligase 3 OS=Arabidopsis thaliana GN=BRG3 PE=1 SV=1//4.64828e-08
Chr12	25751000	25751527	528	Promoter (<=1kb)	25750917	25751288	372	+	LOC_Os12g41610	83	sp|Q9LDD1|BRG3_ARATH Probable BOI-related E3 ubiquitin-protein ligase 3 OS=Arabidopsis thaliana GN=BRG3 PE=1 SV=1//4.64828e-08
Chr12	26026715	26026910	196	Promoter (<=1kb)	26026407	26027537	1131	-	LOC_Os12g41970	627	sp|B9EYD3|PLA4_ORYSJ Phospholipase A1-II 4 OS=Oryza sativa subsp. japonica GN=Os01g0652300 PE=2 SV=2//5.09384e-19
Chr12	26142281	26142476	196	Promoter (<=1kb)	26139485	26141780	2296	-	LOC_Os12g42180	-501	sp|Q93Z17|HLP_ARATH 50S ribosomal protein HLP, mitochondrial OS=Arabidopsis thaliana GN=HLP PE=2 SV=1//1.66415e-55
Chr12	26156024	26156336	313	Promoter (<=1kb)	26155053	26158753	3701	+	LOC_Os12g42190	971	sp|Q2QM59|PCF8_ORYSJ Transcription factor PCF8 OS=Oryza sativa subsp. japonica GN=PCF8 PE=2 SV=1//1.82127e-88
Chr12	26268458	26268667	210	Promoter (<=1kb)	26268230	26270794	2565	+	LOC_Os12g42280	228	sp|O24592|NCED1_MAIZE 9-cis-epoxycarotenoid dioxygenase 1, chloroplastic OS=Zea mays GN=VP14 PE=1 SV=2//0
Chr12	26424685	26424977	293	Promoter (<=1kb)	26424870	26425124	255	+	LOC_Os12g42540	0	sp|Q8RX29|ATL70_ARATH RING-H2 finger protein ATL70 OS=Arabidopsis thaliana GN=ATL70 PE=2 SV=1//6.70275e-21
Chr12	26448717	26448912	196	Promoter (<=1kb)	26449052	26449597	546	-	LOC_Os12g42580	685	sp|Q9ZVM9|Y1461_ARATH Probable serine/threonine-protein kinase At1g54610 OS=Arabidopsis thaliana GN=At1g54610 PE=1 SV=1//1.74148e-26
Chr12	26614466	26614757	292	Promoter (<=1kb)	26613740	26617230	3491	+	LOC_Os12g42830	726	sp|Q9FGN8|DYAD_ARATH Protein DYAD OS=Arabidopsis thaliana GN=DYAD PE=1 SV=2//4.69344e-40
Chr12	26670510	26670705	196	Promoter (1-2kb)	26669155	26671200	2046	+	LOC_Os12g42910	1355	sp|Q9FKP1|CCX1_ARATH Cation/calcium exchanger 1 OS=Arabidopsis thaliana GN=CCX1 PE=2 SV=1//7.89771e-59
Chr12	26711415	26711610	196	Promoter (2-3kb)	26707846	26709385	1540	-	LOC_Os12g42990	-2030	sp|Q9H611|PIF1_HUMAN ATP-dependent DNA helicase PIF1 OS=Homo sapiens GN=PIF1 PE=1 SV=2//8.13806e-15
Chr12	26783150	26783374	225	Promoter (<=1kb)	26780487	26783598	3112	-	LOC_Os12g43130	224	sp|Q9SSU8|PSY_DAUCA Phytoene synthase, chloroplastic OS=Daucus carota GN=PSY PE=2 SV=1//0
Chr12	26839363	26839779	417	Distal Intergenic	26830654	26835967	5314	-	LOC_Os12g43230	-3396	sp|Q99315|YG31B_YEAST Transposon Ty3-G Gag-Pol polyprotein OS=Saccharomyces cerevisiae (strain ATCC 204508 / S288c) GN=TY3B-G PE=1 SV=3//1.94837e-134
Chr12	27289974	27290435	462	Promoter (1-2kb)	27286184	27288661	2478	-	LOC_Os12g43970	-1313	sp|P34913|HYES_HUMAN Bifunctional epoxide hydrolase 2 OS=Homo sapiens GN=EPHX2 PE=1 SV=2//3.92874e-39
Chr2	25624	25839	216	Promoter (<=1kb)	22133	24960	2828	-	LOC_Os02g01040	-664	sp|P08770|TRA1_MAIZE Putative AC transposase OS=Zea mays PE=2 SV=2//1.12728e-20
Chr2	220747	221057	311	Promoter (<=1kb)	219577	221707	2131	-	LOC_Os02g01380	650	sp|Q39117|TGT2_ARATH Trihelix transcription factor GT-2 OS=Arabidopsis thaliana GN=GT-2 PE=2 SV=1//3.17517e-16
Chr2	397362	397632	271	Promoter (<=1kb)	397365	403540	6176	+	LOC_Os02g01720	0	sp|A6QPF8|T120B_BOVIN Transmembrane protein 120B OS=Bos taurus GN=TMEM120B PE=2 SV=1//1.85965e-27
Chr2	537993	538221	229	Promoter (<=1kb)	534930	538203	3274	-	LOC_Os02g01960	0	sp|Q7Z494|NPHP3_HUMAN Nephrocystin-3 OS=Homo sapiens GN=NPHP3 PE=1 SV=1//1.50967e-10
Chr2	595237	596014	778	Distal Intergenic	573100	589743	16644	-	LOC_Os02g02050	-5494	sp|Q9M658|MOM1_ARATH Helicase protein MOM1 OS=Arabidopsis thaliana GN=MOM1 PE=1 SV=1//5.69084e-75
Chr2	595237	596014	778	Distal Intergenic	573100	589743	16644	-	LOC_Os02g02050	-5494	sp|Q9M658|MOM1_ARATH Helicase protein MOM1 OS=Arabidopsis thaliana GN=MOM1 PE=1 SV=1//5.69084e-75
Chr2	677362	677674	313	Promoter (<=1kb)	676466	677742	1277	+	LOC_Os02g02200	896	sp|P28493|PR5_ARATH Pathogenesis-related protein 5 OS=Arabidopsis thaliana GN=At1g75040 PE=1 SV=1//1.59335e-26
Chr2	795361	795852	492	Promoter (<=1kb)	795066	796280	1215	-	LOC_Os02g02380	428	sp|Q9FFA7|RUP2_ARATH WD repeat-containing protein RUP2 OS=Arabidopsis thaliana GN=RUP2 PE=1 SV=1//1.69968e-66
Chr2	809300	809740	441	Distal Intergenic	818981	824546	5566	+	LOC_Os02g02390	-9241	sp|Q6GGT5|RS1_STAAR 30S ribosomal protein S1 OS=Staphylococcus aureus (strain MRSA252) GN=rpsA PE=3 SV=1//8.46664e-15
Chr2	818957	819265	309	Promoter (<=1kb)	818981	824546	5566	+	LOC_Os02g02390	0	sp|Q6GGT5|RS1_STAAR 30S ribosomal protein S1 OS=Staphylococcus aureus (strain MRSA252) GN=rpsA PE=3 SV=1//8.46664e-15
Chr2	896091	896336	246	Promoter (<=1kb)	896074	900377	4304	+	LOC_Os02g02520	17	sp|Q8H0W0|LPA3_ARATH Protein LOW PSII ACCUMULATION 3, chloroplastic OS=Arabidopsis thaliana GN=LPA3 PE=1 SV=1//4.87443e-160
Chr2	1039241	1039534	294	Promoter (<=1kb)	1036857	1039710	2854	-	LOC_Os02g02740	176	sp|Q84J71|PP161_ARATH Pentatricopeptide repeat-containing protein At2g17670 OS=Arabidopsis thaliana GN=At2g17670 PE=2 SV=1//9.77899e-12
Chr2	1173188	1173383	196	Promoter (<=1kb)	1168110	1173449	5340	-	LOC_Os02g02980	66	sp|Q8W4G3|MATE4_ARATH MATE efflux family protein 4, chloroplastic OS=Arabidopsis thaliana GN=DTX46 PE=2 SV=1//0
Chr2	1182473	1182700	228	Promoter (<=1kb)	1178839	1182756	3918	-	LOC_Os02g03000	56	sp|Q9FIG9|ARC6_ARATH Protein ACCUMULATION AND REPLICATION OF CHLOROPLASTS 6, chloroplastic OS=Arabidopsis thaliana GN=ARC6 PE=1 SV=1//0
Chr2	1190859	1191054	196	Promoter (<=1kb)	1190846	1192461	1616	+	LOC_Os02g03030	13	sp|Q9FNE9|ATXR6_ARATH Histone-lysine N-methyltransferase ATXR6 OS=Arabidopsis thaliana GN=ATXR6 PE=1 SV=1//9.20108e-143
Chr2	1265493	1265909	417	Promoter (<=1kb)	1263500	1266099	2600	-	LOC_Os02g03200	190	sp|Q6NQ66|GGLO2_ARATH L-gulonolactone oxidase 2 OS=Arabidopsis thaliana GN=GULLO2 PE=1 SV=1//0
Chr2	1292127	1292442	316	Promoter (<=1kb)	1288971	1292421	3451	-	LOC_Os02g03230	0	sp|Q8R1R3|STAR7_MOUSE StAR-related lipid transfer protein 7, mitochondrial OS=Mus musculus GN=Stard7 PE=2 SV=2//5.95373e-08
Chr2	1412195	1412398	204	Promoter (<=1kb)	1412107	1416005	3899	+	LOC_Os02g03470	88	sp|Q5M7J9|EMC2_XENTR ER membrane protein complex subunit 2 OS=Xenopus tropicalis GN=emc2 PE=2 SV=1//5.04226e-54
Chr2	1450229	1450494	266	Promoter (<=1kb)	1450163	1450996	834	+	LOC_Os02g03570	66	sp|Q0E4A8|HS189_ORYSJ 18.9 kDa heat shock protein OS=Oryza sativa subsp. japonica GN=HSP18.9 PE=3 SV=1//1.50897e-77
Chr2	1829147	1829410	264	Promoter (<=1kb)	1826715	1829346	2632	-	LOC_Os02g04180	0	sp|A3A2W2|CSPLO_ORYSJ CASP-like protein 4A2 OS=Oryza sativa subsp. japonica GN=Os02g0134500 PE=2 SV=2//3.3718e-85
Chr2	1914805	1915042	238	Promoter (1-2kb)	1913425	1916183	2759	-	LOC_Os02g04340	1141	sp|Q5NB82|NLP3_ORYSJ Protein NLP3 OS=Oryza sativa subsp. japonica GN=NLP3 PE=3 SV=1//1.17605e-21
Chr2	2125326	2125589	264	Promoter (<=1kb)	2125283	2128770	3488	+	LOC_Os02g04700	43	sp|Q9M084|SYDC2_ARATH Aspartate--tRNA ligase 2, cytoplasmic OS=Arabidopsis thaliana GN=IBI1 PE=1 SV=1//7.27244e-78
Chr2	2160505	2160826	322	Promoter (<=1kb)	2160020	2161123	1104	+	LOC_Os02g04740	485	sp|Q6Z2X3|MOC2B_ORYSJ Molybdopterin synthase catalytic subunit OS=Oryza sativa subsp. japonica GN=MOCS2 PE=2 SV=1//2.45124e-100
Chr2	2388277	2388533	257	Promoter (<=1kb)	2388399	2394346	5948	+	LOC_Os02g05030	0	sp|Q6YXW6|SPP2_ORYSJ Sucrose-phosphatase 2 OS=Oryza sativa subsp. japonica GN=SPP2 PE=1 SV=1//0
Chr2	2438901	2439319	419	Promoter (<=1kb)	2439558	2442916	3359	+	LOC_Os02g05110	-239	sp|Q9LNG5|PPP7L_ARATH Serine/threonine-protein phosphatase 7 long form homolog OS=Arabidopsis thaliana GN=At1g48120 PE=2 SV=1//5.81731e-10
Chr2	2551662	2551901	240	Promoter (<=1kb)	2551636	2556275	4640	+	LOC_Os02g05320	26	sp|Q58CR4|DOLK_BOVIN Dolichol kinase OS=Bos taurus GN=DOLK PE=2 SV=1//6.82043e-27
Chr2	2738088	2738308	221	Promoter (<=1kb)	2735886	2738357	2472	-	LOC_Os02g05620	49	sp|Q9LZD3|E70A1_ARATH Exocyst complex component EXO70A1 OS=Arabidopsis thaliana GN=EXO70A1 PE=1 SV=1//2.9737e-61
Chr2	2887751	2887946	196	Promoter (<=1kb)	2887328	2892037	4710	+	LOC_Os02g05850	423	sp|Q9NXP7|GIN1_HUMAN Gypsy retrotransposon integrase-like protein 1 OS=Homo sapiens GN=GIN1 PE=2 SV=3//3.46078e-21
Chr2	3020258	3020461	204	Promoter (<=1kb)	3014626	3020781	6156	-	LOC_Os02g06050	320	sp|Q7LHG5|YI31B_YEAST Transposon Ty3-I Gag-Pol polyprotein OS=Saccharomyces cerevisiae (strain ATCC 204508 / S288c) GN=TY3B-I PE=3 SV=2//2.15756e-10
Chr2	3152466	3152661	196	Promoter (<=1kb)	3143758	3152627	8870	-	LOC_Os02g06300	0	sp|B9F2U5|GUFP_ORYSJ Translation factor GUF1 homolog, chloroplastic OS=Oryza sativa subsp. japonica GN=Os02g0157700 PE=3 SV=1//0
Chr2	3158942	3159137	196	Promoter (<=1kb)	3158639	3160602	1964	+	LOC_Os02g06320	303	sp|Q6ET49|OML7_ORYSJ Protein MEI2-like 7 OS=Oryza sativa subsp. japonica GN=OML7 PE=2 SV=1//0
Chr2	3171786	3172283	498	Promoter (<=1kb)	3171934	3174991	3058	+	LOC_Os02g06350	0	sp|Q9SF16|TCPH_ARATH T-complex protein 1 subunit eta OS=Arabidopsis thaliana GN=CCT7 PE=1 SV=1//1.40079e-09
Chr2	3179540	3179805	266	Promoter (<=1kb)	3179477	3182791	3315	+	LOC_Os02g06360	63	sp|Q9M1T1|SETH3_ARATH Probable arabinose 5-phosphate isomerase OS=Arabidopsis thaliana GN=SETH3 PE=2 SV=1//1.06384e-151
Chr2	3189458	3189723	266	Promoter (<=1kb)	3187941	3190190	2250	-	LOC_Os02g06380	467	sp|Q9FH92|IX15L_ARATH Protein IRX15-LIKE OS=Arabidopsis thaliana GN=IRX15-L PE=2 SV=1//1.01081e-65
Chr2	3205530	3205725	196	Promoter (1-2kb)	3204086	3206334	2249	+	LOC_Os02g06410	1444	sp|Q8GXI9|PV42B_ARATH SNF1-related protein kinase regulatory subunit gamma-like PV42b OS=Arabidopsis thaliana GN=PV42B PE=2 SV=1//6.13933e-63
Chr2	3286697	3286895	199	Promoter (<=1kb)	3283212	3286408	3197	-	LOC_Os02g06570	-289	sp|Q6H7U5|CIPKQ_ORYSJ CBL-interacting protein kinase 26 OS=Oryza sativa subsp. japonica GN=CIPK26 PE=2 SV=1//0
Chr2	3361679	3361931	253	Promoter (<=1kb)	3358904	3360720	1817	-	LOC_Os02g06700	-959	sp|P19950|RS141_MAIZE 40S ribosomal protein S14 OS=Zea mays PE=3 SV=1//1.10117e-66
Chr2	3459736	3459954	219	Promoter (<=1kb)	3459445	3460305	861	+	LOC_Os02g06860	291	sp|Q4PSU4|AGL61_ARATH Agamous-like MADS-box protein AGL61 OS=Arabidopsis thaliana GN=AGL61 PE=1 SV=1//1.15196e-17
Chr2	3679246	3679539	294	Promoter (<=1kb)	3677196	3679955	2760	-	LOC_Os02g07160	416	sp|O48604|HPPD_HORVU 4-hydroxyphenylpyruvate dioxygenase OS=Hordeum vulgare PE=2 SV=1//5.78134e-179
Chr2	3694699	3695111	413	Promoter (<=1kb)	3694692	3699527	4836	+	LOC_Os02g07190	7	sp|C6L7U1|LIN1_LOTJA Putative E3 ubiquitin-protein ligase LIN-1 OS=Lotus japonicus GN=CERBERUS PE=2 SV=2//7.72422e-14
Chr2	3715398	3715607	210	Promoter (<=1kb)	3715298	3718267	2970	+	LOC_Os02g07230	100	sp|Q6H6D2|HEM3_ORYSJ Porphobilinogen deaminase, chloroplastic OS=Oryza sativa subsp. japonica GN=HEMC PE=2 SV=1//0
Chr2	4034065	4034404	340	Promoter (<=1kb)	4034222	4038406	4185	+	LOC_Os02g07740	0	sp|C4L7I7|RLMI_TOLAT Ribosomal RNA large subunit methyltransferase I OS=Tolumonas auensis (strain DSM 9187 / TA4) GN=rlmI PE=3 SV=1//1.48447e-59
Chr2	4086419	4086680	262	Promoter (<=1kb)	4086437	4089165	2729	+	LOC_Os02g07810	0	sp|C0LGR9|Y4312_ARATH Probable LRR receptor-like serine/threonine-protein kinase At4g31250 OS=Arabidopsis thaliana GN=At4g31250 PE=2 SV=1//5.99561e-25
Chr2	4482773	4482968	196	Promoter (<=1kb)	4481872	4483470	1599	+	LOC_Os02g08400	901	sp|O64815|HLS1L_ARATH Probable N-acetyltransferase HLS1-like OS=Arabidopsis thaliana GN=At2g23060 PE=2 SV=1//4.36835e-47
Chr2	4489168	4489363	196	Promoter (<=1kb)	4486471	4489409	2939	-	LOC_Os02g08410	46	sp|Q9S7H4|CM2_ARATH Chorismate mutase 2 OS=Arabidopsis thaliana GN=CM2 PE=1 SV=1//1.86649e-73
Chr2	4572810	4573027	218	Promoter (<=1kb)	4567617	4573049	5433	-	LOC_Os02g08490	22	sp|Q0E3C8|CLPB3_ORYSJ Chaperone protein ClpB3, mitochondrial OS=Oryza sativa subsp. japonica GN=CLPB3 PE=2 SV=3//0
Chr2	4597622	4597882	261	Promoter (2-3kb)	4594375	4595386	1012	-	LOC_Os02g08510	-2236	sp|Q39262|ZFP3_ARATH Zinc finger protein 3 OS=Arabidopsis thaliana GN=ZFP3 PE=2 SV=1//2.61751e-12
Chr2	4826501	4826696	196	Promoter (<=1kb)	4826405	4828225	1821	+	LOC_Os02g09400	96	sp|A3A871|C71Z6_ORYSJ Ent-isokaurene C2-hydroxylase OS=Oryza sativa subsp. japonica GN=CYP71Z6 PE=1 SV=1//2.28999e-133
Chr2	4829797	4829992	196	Promoter (1-2kb)	4828671	4830333	1663	+	LOC_Os02g09410	1126	sp|A6YIH8|C7D55_HYOMU Premnaspirodiene oxygenase OS=Hyoscyamus muticus GN=CYP71D55 PE=1 SV=1//7.98609e-101
Chr2	4868222	4868417	196	Promoter (<=1kb)	4867674	4869380	1707	+	LOC_Os02g09480	548	sp|Q9FDW1|MYB44_ARATH Transcription factor MYB44 OS=Arabidopsis thaliana GN=MYB44 PE=2 SV=1//5.31209e-60
Chr2	4888701	4889065	365	Promoter (1-2kb)	4888513	4890159	1647	-	LOC_Os02g09510	1094	sp|Q66PF4|CGT_FRAAN Cinnamate beta-D-glucosyltransferase OS=Fragaria ananassa GN=GT2 PE=1 SV=1//9.14881e-112
Chr2	4889888	4890257	370	Promoter (<=1kb)	4888513	4890159	1647	-	LOC_Os02g09510	0	sp|Q66PF4|CGT_FRAAN Cinnamate beta-D-glucosyltransferase OS=Fragaria ananassa GN=GT2 PE=1 SV=1//9.14881e-112
Chr2	4915971	4916166	196	Promoter (<=1kb)	4915508	4921471	5964	+	LOC_Os02g09550	463	sp|Q7LHG5|YI31B_YEAST Transposon Ty3-I Gag-Pol polyprotein OS=Saccharomyces cerevisiae (strain ATCC 204508 / S288c) GN=TY3B-I PE=3 SV=2//1.45278e-06
Chr2	5075092	5075287	196	Promoter (<=1kb)	5071315	5075536	4222	-	LOC_Os02g09840	249	sp|Q8VZQ4|2AB2C_ARATH Probable serine/threonine protein phosphatase 2A regulatory subunit B&apos;&apos;gamma OS=Arabidopsis thaliana GN=B&apos;&apos;GAMMA PE=2 SV=1//0
Chr2	5131683	5132259	577	Promoter (<=1kb)	5131380	5132629	1250	+	LOC_Os02g09910	303	sp|Q9SGH2|MBD9_ARATH Methyl-CpG-binding domain-containing protein 9 OS=Arabidopsis thaliana GN=MBD9 PE=2 SV=1//8.71729e-10
Chr2	5181252	5181530	279	Promoter (1-2kb)	5179753	5182124	2372	+	LOC_Os02g09960	1499	sp|O22808|LYK5_ARATH Protein LYK5 OS=Arabidopsis thaliana GN=LYK5 PE=2 SV=1//2.56308e-27
Chr2	5238296	5238499	204	Promoter (<=1kb)	5238182	5242116	3935	+	LOC_Os02g10060	114	sp|Q84JG2|SWI3B_ARATH SWI/SNF complex subunit SWI3B OS=Arabidopsis thaliana GN=SWI3B PE=1 SV=1//7.58424e-101
Chr2	5452504	5452727	224	Promoter (<=1kb)	5451819	5453090	1272	-	LOC_Os02g10360	363	sp|Q84MM9|MOC_ORYSJ Protein MONOCULM 1 OS=Oryza sativa subsp. japonica GN=MOC1 PE=2 SV=1//5.2023e-94
Chr2	5748925	5749283	359	Promoter (<=1kb)	5748604	5749500	897	-	LOC_Os02g10830	217	sp|Q8W0E4|SAT1_ORYSJ Probable serine acetyltransferase 1 OS=Oryza sativa subsp. japonica GN=SAT1 PE=2 SV=1//1.65237e-107
Chr2	5756325	5756628	304	Promoter (1-2kb)	5755371	5758098	2728	-	LOC_Os02g10850	1470	sp|Q93W93|FBK22_ARATH F-box/kelch-repeat protein At1g55270 OS=Arabidopsis thaliana GN=At1g55270 PE=2 SV=1//1.46198e-147
Chr2	5762526	5762752	227	Promoter (<=1kb)	5760034	5763645	3612	-	LOC_Os02g10860	893	sp|Q9SM50|HY5_SOLLC Transcription factor HY5 OS=Solanum lycopersicum GN=HY5 PE=2 SV=1//7.63336e-35
Chr2	6038296	6038527	232	Promoter (1-2kb)	6038222	6039636	1415	-	LOC_Os02g11720	1109	sp|Q9C942|CSE_ARATH Caffeoylshikimate esterase OS=Arabidopsis thaliana GN=CSE PE=1 SV=1//1.8493e-143
Chr2	6094598	6094951	354	Promoter (<=1kb)	6092981	6095907	2927	-	LOC_Os02g11790	956	sp|Q9M8L2|FBK30_ARATH F-box/kelch-repeat protein At1g80440 OS=Arabidopsis thaliana GN=At1g80440 PE=2 SV=1//2.10366e-49
Chr2	6310527	6310849	323	Promoter (<=1kb)	6299213	6310619	11407	-	LOC_Os02g12120	0	sp|P10978|POLX_TOBAC Retrovirus-related Pol polyprotein from transposon TNT 1-94 OS=Nicotiana tabacum PE=2 SV=1//1.22872e-36
Chr2	6377355	6377550	196	Promoter (<=1kb)	6376517	6377029	513	+	LOC_Os02g12240	838	sp|Q9ZUH1|Y2424_ARATH BTB/POZ domain-containing protein At2g24240 OS=Arabidopsis thaliana GN=At2g24240 PE=2 SV=1//4.18609e-31
Chr2	6480191	6480386	196	Promoter (<=1kb)	6476660	6480097	3438	-	LOC_Os02g12420	-94	sp|C0LGP4|Y3475_ARATH Probable LRR receptor-like serine/threonine-protein kinase At3g47570 OS=Arabidopsis thaliana GN=At3g47570 PE=2 SV=1//0
Chr2	6582283	6582478	196	Promoter (<=1kb)	6582328	6588245	5918	+	LOC_Os02g12600	0	sp|Q96P11|NSUN5_HUMAN Probable 28S rRNA (cytosine-C(5))-methyltransferase OS=Homo sapiens GN=NSUN5 PE=1 SV=2//1.12597e-74
Chr2	6733011	6733241	231	Promoter (<=1kb)	6726340	6733254	6915	-	LOC_Os02g12810	13	sp|Q05609|CTR1_ARATH Serine/threonine-protein kinase CTR1 OS=Arabidopsis thaliana GN=CTR1 PE=1 SV=1//2.19052e-30
Chr2	6903305	6903511	207	Promoter (1-2kb)	6902074	6903970	1897	+	LOC_Os02g13020	1231	sp|Q6L506|RIBA3_ORYSJ Probable monofunctional riboflavin biosynthesis protein RIBA 3, chloroplastic OS=Oryza sativa subsp. japonica GN=RIBA3 PE=2 SV=1//2.5688e-16
Chr2	6979772	6979967	196	Promoter (<=1kb)	6979511	6985051	5541	+	LOC_Os02g13130	261	sp|Q91WJ8|FUBP1_MOUSE Far upstream element-binding protein 1 OS=Mus musculus GN=Fubp1 PE=1 SV=1//1.20597e-16
Chr2	7024978	7025257	280	Promoter (<=1kb)	7024790	7025386	597	+	LOC_Os02g13180	188	sp|Q9LSX9|ASK9_ARATH SKP1-like protein 9 OS=Arabidopsis thaliana GN=ASK9 PE=1 SV=1//5.27445e-21
Chr2	7062933	7063130	198	Promoter (<=1kb)	7062837	7064444	1608	+	LOC_Os02g13260	96	sp|O65451|FB333_ARATH Probable F-box protein At4g22030 OS=Arabidopsis thaliana GN=At4g22030 PE=4 SV=1//1.80307e-35
Chr2	7365736	7366067	332	Promoter (<=1kb)	7365220	7366415	1196	+	LOC_Os02g13710	516	sp|Q9LYD3|DREB3_ARATH Dehydration-responsive element-binding protein 3 OS=Arabidopsis thaliana GN=DREB3 PE=2 SV=1//1.70386e-23
Chr2	7390547	7390742	196	Promoter (<=1kb)	7387035	7390209	3175	-	LOC_Os02g13730	-338	sp|P04146|COPIA_DROME Copia protein OS=Drosophila melanogaster GN=GIP PE=1 SV=3//1.22211e-15
Chr2	7514960	7515268	309	Promoter (<=1kb)	7513963	7514649	687	-	LOC_Os02g13860	-311	sp|Q53NL5|XIP2_ORYSJ Xylanase inhibitor protein 2 OS=Oryza sativa subsp. japonica GN=Chib3H-h PE=1 SV=1//1.13568e-27
Chr2	7690383	7690785	403	Promoter (<=1kb)	7690242	7692254	2013	+	LOC_Os02g14090	141	sp|Q8GTB6|THCAS_CANSA Tetrahydrocannabinolic acid synthase OS=Cannabis sativa PE=1 SV=1//1.43272e-116
Chr2	7715460	7715723	264	Promoter (<=1kb)	7710512	7715739	5228	-	LOC_Os02g14120	16	sp|C0LGU5|Y5457_ARATH Probable LRR receptor-like serine/threonine-protein kinase At5g45780 OS=Arabidopsis thaliana GN=At5g45780 PE=2 SV=1//0
Chr2	7977301	7977514	214	Promoter (1-2kb)	7975665	7978686	3022	-	LOC_Os02g14480	1172	sp|C0LGK9|Y2242_ARATH Probable LRR receptor-like serine/threonine-protein kinase At2g24230 OS=Arabidopsis thaliana GN=At2g24230 PE=2 SV=1//4.85539e-45
Chr2	7978133	7978328	196	Promoter (<=1kb)	7975665	7978686	3022	-	LOC_Os02g14480	358	sp|C0LGK9|Y2242_ARATH Probable LRR receptor-like serine/threonine-protein kinase At2g24230 OS=Arabidopsis thaliana GN=At2g24230 PE=2 SV=1//4.85539e-45
Chr2	8018327	8018627	301	Promoter (<=1kb)	8018192	8019355	1164	-	LOC_Os02g14540	728	sp|Q9AR73|HQGT_RAUSE Hydroquinone glucosyltransferase OS=Rauvolfia serpentina GN=AS PE=1 SV=1//3.72642e-93
Chr2	8197272	8197491	220	Promoter (<=1kb)	8196895	8200388	3494	+	LOC_Os02g14780	377	sp|Q8RXF1|SF3A1_ARATH Probable splicing factor 3A subunit 1 OS=Arabidopsis thaliana GN=At1g14650 PE=1 SV=2//7.14812e-34
Chr2	8260907	8261181	275	Promoter (<=1kb)	8261308	8262089	782	-	LOC_Os02g14855	908	sp|Q9LDD1|BRG3_ARATH Probable BOI-related E3 ubiquitin-protein ligase 3 OS=Arabidopsis thaliana GN=BRG3 PE=1 SV=1//5.40293e-06
Chr2	8261827	8262030	204	Promoter (<=1kb)	8261308	8262089	782	-	LOC_Os02g14855	59	sp|Q9LDD1|BRG3_ARATH Probable BOI-related E3 ubiquitin-protein ligase 3 OS=Arabidopsis thaliana GN=BRG3 PE=1 SV=1//5.40293e-06
Chr2	8367552	8367796	245	Promoter (<=1kb)	8367222	8368328	1107	-	LOC_Os02g15000	532	sp|Q9LUL6|ATL61_ARATH Putative RING-H2 finger protein ATL61 OS=Arabidopsis thaliana GN=ATL61 PE=3 SV=1//7.78726e-10
Chr2	8394983	8395178	196	Promoter (<=1kb)	8394294	8395145	852	+	LOC_Os02g15050	689	sp|Q6L506|RIBA3_ORYSJ Probable monofunctional riboflavin biosynthesis protein RIBA 3, chloroplastic OS=Oryza sativa subsp. japonica GN=RIBA3 PE=2 SV=1//5.47946e-12
Chr2	8405495	8405720	226	Promoter (<=1kb)	8405272	8405967	696	-	LOC_Os02g15080	247	sp|Q9M0R5|ATL36_ARATH Putative RING-H2 finger protein ATL36 OS=Arabidopsis thaliana GN=ATL36 PE=3 SV=1//9.9215e-17
Chr2	8411584	8411812	229	Promoter (<=1kb)	8411434	8411967	534	-	LOC_Os02g15100	155	sp|Q8L9T5|ATL2_ARATH RING-H2 finger protein ATL2 OS=Arabidopsis thaliana GN=ATL2 PE=2 SV=2//3.61767e-17
Chr2	8417267	8417468	202	Promoter (<=1kb)	8417085	8417585	501	-	LOC_Os02g15110	117	sp|Q8W571|ATL32_ARATH RING-H2 finger protein ATL32 OS=Arabidopsis thaliana GN=ATL32 PE=2 SV=3//1.54645e-16
Chr2	8422922	8423122	201	Promoter (<=1kb)	8422789	8423854	1066	+	LOC_Os02g15120	133	sp|Q9SL78|ATL12_ARATH Putative RING-H2 finger protein ATL12 OS=Arabidopsis thaliana GN=ATL12 PE=3 SV=1//1.89549e-07
Chr2	8423321	8423536	216	Promoter (<=1kb)	8422789	8423854	1066	+	LOC_Os02g15120	532	sp|Q9SL78|ATL12_ARATH Putative RING-H2 finger protein ATL12 OS=Arabidopsis thaliana GN=ATL12 PE=3 SV=1//1.89549e-07
Chr2	8515229	8515550	322	Promoter (<=1kb)	8508504	8515679	7176	-	LOC_Os02g15240	129	sp|Q9LNG5|PPP7L_ARATH Serine/threonine-protein phosphatase 7 long form homolog OS=Arabidopsis thaliana GN=At1g48120 PE=2 SV=1//7.50326e-61
Chr2	8516087	8516461	375	Promoter (<=1kb)	8508504	8515679	7176	-	LOC_Os02g15240	-408	sp|Q9LNG5|PPP7L_ARATH Serine/threonine-protein phosphatase 7 long form homolog OS=Arabidopsis thaliana GN=At1g48120 PE=2 SV=1//7.50326e-61
Chr2	8873334	8873529	196	Promoter (<=1kb)	8873032	8876441	3410	+	LOC_Os02g15750	302	sp|Q9M158|STR4_ARATH Rhodanese-like domain-containing protein 4, chloroplastic OS=Arabidopsis thaliana GN=STR4 PE=1 SV=2//2.21983e-77
Chr2	9211507	9211729	223	Promoter (<=1kb)	9210689	9214700	4012	+	LOC_Os02g16210	818	sp|Q9SZL8|FRS5_ARATH Protein FAR1-RELATED SEQUENCE 5 OS=Arabidopsis thaliana GN=FRS5 PE=2 SV=1//3.66681e-44
Chr2	9238405	9238600	196	Promoter (<=1kb)	9238439	9239236	798	+	LOC_Os02g16250	0	sp|Q9LRR4|R13L1_ARATH Putative disease resistance RPP13-like protein 1 OS=Arabidopsis thaliana GN=RPPL1 PE=3 SV=1//1.22576e-10
Chr2	9571910	9572340	431	Promoter (<=1kb)	9571152	9571805	654	-	LOC_Os02g16790	-105	sp|Q9SUQ3|Y4374_ARATH Probable inactive receptor kinase At4g23740 OS=Arabidopsis thaliana GN=At4g23740 PE=2 SV=1//1.07536e-22
Chr2	9624500	9624858	359	Promoter (<=1kb)	9617783	9623835	6053	-	LOC_Os02g16880	-665	sp|F4IUE7|COV1_ARATH Protein CONTINUOUS VASCULAR RING 1 OS=Arabidopsis thaliana GN=COV1 PE=1 SV=2//3.86752e-118
Chr2	10013271	10013466	196	Promoter (<=1kb)	10010588	10013470	2883	-	LOC_Os02g17400	4	sp|C0LGQ5|GSO1_ARATH LRR receptor-like serine/threonine-protein kinase GSO1 OS=Arabidopsis thaliana GN=GSO1 PE=2 SV=1//5.34e-78
Chr2	10051199	10051476	278	Promoter (<=1kb)	10051108	10056497	5390	+	LOC_Os02g17470	91	sp|Q92804|RBP56_HUMAN TATA-binding protein-associated factor 2N OS=Homo sapiens GN=TAF15 PE=1 SV=1//6.93702e-07
Chr2	10354281	10354606	326	Promoter (<=1kb)	10351706	10354072	2367	-	LOC_Os02g17870	-209	sp|P55080|MFAP1_CHICK Microfibrillar-associated protein 1 OS=Gallus gallus GN=MFAP1 PE=2 SV=1//2.03869e-42
Chr2	10621642	10621977	336	Promoter (<=1kb)	10622200	10626570	4371	+	LOC_Os02g18310	-223	sp|P10978|POLX_TOBAC Retrovirus-related Pol polyprotein from transposon TNT 1-94 OS=Nicotiana tabacum PE=2 SV=1//0
Chr2	11101130	11101419	290	Promoter (<=1kb)	11101210	11102631	1422	+	LOC_Os02g19000	0	sp|Q9LMJ3|GDL1_ARATH GDSL esterase/lipase At1g06990 OS=Arabidopsis thaliana GN=At1g06990 PE=2 SV=2//9.94741e-12
Chr2	11171147	11171572	426	Promoter (<=1kb)	11162263	11171493	9231	-	LOC_Os02g19150	0	sp|Q5LUP9|CLPX_RUEPO ATP-dependent Clp protease ATP-binding subunit ClpX OS=Ruegeria pomeroyi (strain ATCC 700808 / DSM 15171 / DSS-3) GN=clpX PE=3 SV=1//6.17436e-128
Chr2	11550046	11550277	232	Promoter (<=1kb)	11550975	11554441	3467	+	LOC_Os02g19750	-698	sp|Q39214|RPM1_ARATH Disease resistance protein RPM1 OS=Arabidopsis thaliana GN=RPM1 PE=1 SV=1//4.47828e-61
Chr2	11684313	11684508	196	Distal Intergenic	11693453	11698948	5496	+	LOC_Os02g19880	-8945	sp|Q5PQL2|RCD1_RAT Cell differentiation protein RCD1 homolog OS=Rattus norvegicus GN=Rqcd1 PE=1 SV=1//1.15088e-104
Chr2	11717700	11717958	259	Promoter (<=1kb)	11716855	11736546	19692	+	LOC_Os02g19924	845	sp|Q9LVY1|TAT_ARATH Tyrosine aminotransferase OS=Arabidopsis thaliana GN=TAT PE=2 SV=1//6.53033e-161
Chr2	11758595	11759032	438	Promoter (<=1kb)	11758502	11762735	4234	+	LOC_Os02g19990	93	sp|Q6DR04|RTNLQ_ARATH Reticulon-like protein B17 OS=Arabidopsis thaliana GN=RTNLB17 PE=2 SV=1//1.77918e-60
Chr2	11988853	11989073	221	Promoter (<=1kb)	11988336	11992859	4524	+	LOC_Os02g20350	517	sp|P92519|M810_ARATH Uncharacterized mitochondrial protein AtMg00810 OS=Arabidopsis thaliana GN=AtMg00810 PE=4 SV=1//1.69641e-15
Chr2	12148939	12149422	484	Promoter (1-2kb)	12146393	12147625	1233	-	LOC_Os02g20600	-1314	sp|Q9M8J9|BPM2_ARATH BTB/POZ and MATH domain-containing protein 2 OS=Arabidopsis thaliana GN=BPM2 PE=1 SV=1//4.71476e-46
Chr2	12405174	12405369	196	Promoter (<=1kb)	12398421	12404925	6505	-	LOC_Os02g20970	-249	sp|Q93XX4|C2D61_ARATH C2 domain-containing protein At1g53590 OS=Arabidopsis thaliana GN=NTMC2T6.1 PE=1 SV=2//0
Chr2	12641782	12641977	196	Distal Intergenic	12645460	12648014	2555	+	LOC_Os02g21300	-3483	sp|O22048|AOX1C_ARATH Ubiquinol oxidase 1c, mitochondrial OS=Arabidopsis thaliana GN=AOX1C PE=1 SV=1//3.82046e-141
Chr2	12720897	12721186	290	Promoter (<=1kb)	12720883	12729014	8132	+	LOC_Os02g21430	14	sp|Q6EQX3|OML5_ORYSJ Protein MEI2-like 5 OS=Oryza sativa subsp. japonica GN=ML5 PE=2 SV=1//0
Chr2	12807063	12807336	274	Promoter (2-3kb)	12798344	12804729	6386	-	LOC_Os02g21560	-2334	sp|P92519|M810_ARATH Uncharacterized mitochondrial protein AtMg00810 OS=Arabidopsis thaliana GN=AtMg00810 PE=4 SV=1//2.10124e-36
Chr2	13252781	13253080	300	Promoter (<=1kb)	13251324	13252034	711	-	LOC_Os02g22220	-747	sp|Q99315|YG31B_YEAST Transposon Ty3-G Gag-Pol polyprotein OS=Saccharomyces cerevisiae (strain ATCC 204508 / S288c) GN=TY3B-G PE=1 SV=3//8.49939e-11
Chr2	13384869	13385064	196	Promoter (<=1kb)	13385431	13389211	3781	+	LOC_Os02g22410	-367	sp|Q7LHG5|YI31B_YEAST Transposon Ty3-I Gag-Pol polyprotein OS=Saccharomyces cerevisiae (strain ATCC 204508 / S288c) GN=TY3B-I PE=3 SV=2//2.07068e-30
Chr2	14010384	14010677	294	Promoter (<=1kb)	14011216	14018122	6907	+	LOC_Os02g24190	-539	sp|Q6Z7H3|CCT12_ORYSJ Cyclin-T1-2 OS=Oryza sativa subsp. japonica GN=CYCT1_2 PE=2 SV=2//0
Chr2	14557284	14557523	240	Promoter (<=1kb)	14557082	14559123	2042	+	LOC_Os02g25080	202	sp|Q56XJ7|Y4276_ARATH Uncharacterized protein At4g22758 OS=Arabidopsis thaliana GN=At4g22758 PE=2 SV=1//2.0527e-17
Chr2	15045532	15045791	260	Promoter (<=1kb)	15044756	15045814	1059	+	LOC_Os02g25700	776	sp|Q9FJ75|WAXS4_ARATH Probable long-chain-alcohol O-fatty-acyltransferase 4 OS=Arabidopsis thaliana GN=AT4 PE=2 SV=1//1.43268e-66
Chr2	15143087	15143357	271	Promoter (<=1kb)	15141480	15143611	2132	-	LOC_Os02g25840	254	sp|Q8L838|COG4_ARATH Conserved oligomeric Golgi complex subunit 4 OS=Arabidopsis thaliana GN=COG4 PE=2 SV=1//8.85681e-141
Chr2	15343153	15343406	254	Promoter (<=1kb)	15337705	15343669	5965	-	LOC_Os02g26110	263	sp|Q7LHG5|YI31B_YEAST Transposon Ty3-I Gag-Pol polyprotein OS=Saccharomyces cerevisiae (strain ATCC 204508 / S288c) GN=TY3B-I PE=3 SV=2//7.54226e-36
Chr2	15374430	15374852	423	Promoter (<=1kb)	15374305	15389963	15659	+	LOC_Os02g26190	125	sp|Q9ZPX9|KIC_ARATH Calcium-binding protein KIC OS=Arabidopsis thaliana GN=KIC PE=1 SV=2//1.04223e-07
Chr2	15418908	15419182	275	Promoter (<=1kb)	15415298	15418109	2812	-	LOC_Os02g26240	-799	sp|P04323|POL3_DROME Retrovirus-related Pol polyprotein from transposon 17.6 OS=Drosophila melanogaster GN=pol PE=3 SV=1//2.38893e-10
Chr2	15770473	15770701	229	Promoter (<=1kb)	15770441	15775349	4909	+	LOC_Os02g26860	32	sp|Q8R1R3|STAR7_MOUSE StAR-related lipid transfer protein 7, mitochondrial OS=Mus musculus GN=Stard7 PE=2 SV=2//1.4565e-07
Chr2	16013669	16013961	293	Promoter (<=1kb)	16009509	16014483	4975	-	LOC_Os02g27220	522	sp|Q6K6N7|P2C14_ORYSJ Probable protein phosphatase 2C 14 OS=Oryza sativa subsp. japonica GN=Os02g0471500 PE=2 SV=1//0
Chr2	16265548	16265758	211	Promoter (<=1kb)	16265380	16268835	3456	+	LOC_Os02g27490	168	sp|Q6K739|BASS3_ORYSJ Probable sodium/metabolite cotransporter BASS3, chloroplastic OS=Oryza sativa subsp. japonica GN=BASS3 PE=2 SV=1//0
Chr2	16273503	16273715	213	Promoter (<=1kb)	16270018	16272549	2532	-	LOC_Os02g27500	-954	sp|P0C8S1|RP8L2_ARATH Probable disease resistance RPP8-like protein 2 OS=Arabidopsis thaliana GN=RPP8L2 PE=3 SV=1//1.39649e-24
Chr2	16366448	16366712	265	Promoter (2-3kb)	16360083	16364429	4347	-	LOC_Os02g27620	-2019	sp|Q84W55|IP5PF_ARATH Type II inositol polyphosphate 5-phosphatase 15 OS=Arabidopsis thaliana GN=IP5P15 PE=1 SV=2//1.35936e-60
Chr2	16530922	16531117	196	Promoter (<=1kb)	16530749	16534064	3316	+	LOC_Os02g27940	173	sp|Q8LEM7|CNBL3_ARATH Calcineurin B-like protein 3 OS=Arabidopsis thaliana GN=CBL3 PE=1 SV=2//5.10071e-54
Chr2	16590300	16590495	196	Promoter (<=1kb)	16583415	16589597	6183	-	LOC_Os02g28010	-703	sp|Q99315|YG31B_YEAST Transposon Ty3-G Gag-Pol polyprotein OS=Saccharomyces cerevisiae (strain ATCC 204508 / S288c) GN=TY3B-G PE=1 SV=3//5.23366e-143
Chr2	16662343	16662541	199	Promoter (1-2kb)	16660894	16661495	602	+	LOC_Os02g28130	1449	sp|Q9LTW9|FLA14_ARATH Fasciclin-like arabinogalactan protein 14 OS=Arabidopsis thaliana GN=FLA14 PE=2 SV=1//1.82415e-12
Chr2	17074177	17074372	196	Promoter (<=1kb)	17074201	17082223	8023	+	LOC_Os02g28850	0	sp|Q8L7Y8|KN12B_ARATH Kinesin-like protein KIN12B OS=Arabidopsis thaliana GN=KIN12B PE=1 SV=1//1.87179e-97
Chr2	17275427	17275622	196	Promoter (<=1kb)	17271183	17275865	4683	-	LOC_Os02g29150	243	sp|Q54DA8|STIP1_DICDI Protein STIP1 homolog OS=Dictyostelium discoideum GN=sti1 PE=3 SV=1//4.27695e-11
Chr2	17562348	17562543	196	Promoter (<=1kb)	17559217	17562804	3588	-	LOC_Os02g29530	261	sp|Q9LSG3|GAUT8_ARATH Galacturonosyltransferase 8 OS=Arabidopsis thaliana GN=GAUT8 PE=1 SV=1//0
Chr2	17630773	17631012	240	Promoter (1-2kb)	17627423	17632169	4747	-	LOC_Os02g29640	1157	sp|Q9SZL8|FRS5_ARATH Protein FAR1-RELATED SEQUENCE 5 OS=Arabidopsis thaliana GN=FRS5 PE=2 SV=1//5.01359e-57
Chr2	17769915	17770110	196	Promoter (<=1kb)	17770415	17773739	3325	+	LOC_Os02g29880	-305	sp|O00370|LORF2_HUMAN LINE-1 retrotransposable element ORF2 protein OS=Homo sapiens PE=1 SV=1//3.19563e-06
Chr2	17846215	17846429	215	Promoter (<=1kb)	17846285	17847898	1614	+	LOC_Os02g30050	0	sp|Q9M5L0|RL35_EUPES 60S ribosomal protein L35 OS=Euphorbia esula GN=RPL35 PE=2 SV=1//1.96772e-61
Chr2	17862545	17862795	251	Promoter (<=1kb)	17862194	17866853	4660	+	LOC_Os02g30080	351	sp|Q6WNR0|C81E7_MEDTR Isoflavone 2&apos;-hydroxylase OS=Medicago truncatula GN=CYP81E7 PE=1 SV=1//1.55769e-106
Chr2	17873892	17874087	196	Promoter (<=1kb)	17873662	17876075	2414	+	LOC_Os02g30100	230	sp|Q6WNR0|C81E7_MEDTR Isoflavone 2&apos;-hydroxylase OS=Medicago truncatula GN=CYP81E7 PE=1 SV=1//1.91641e-117
Chr2	17881036	17881298	263	Promoter (<=1kb)	17880886	17886427	5542	+	LOC_Os02g30110	150	sp|P93147|C81E1_GLYEC Isoflavone 2&apos;-hydroxylase OS=Glycyrrhiza echinata GN=CYP81E1 PE=1 SV=2//4.8374e-103
Chr2	17963803	17964175	373	Promoter (2-3kb)	17958496	17961723	3228	-	LOC_Os02g30210	-2080	sp|Q9CAG8|FBK28_ARATH F-box/kelch-repeat protein At1g67480 OS=Arabidopsis thaliana GN=At1g67480 PE=2 SV=1//2.2063e-141
Chr2	17975703	17975970	268	Promoter (<=1kb)	17975315	17981107	5793	+	LOC_Os02g30230	388	sp|Q9FGH9|E70B1_ARATH Exocyst complex component EXO70B1 OS=Arabidopsis thaliana GN=EXO70B1 PE=1 SV=1//4.19549e-93
Chr2	18019045	18019382	338	Promoter (<=1kb)	18011417	18019420	8004	-	LOC_Os02g30290	38	sp|Q9LNG5|PPP7L_ARATH Serine/threonine-protein phosphatase 7 long form homolog OS=Arabidopsis thaliana GN=At1g48120 PE=2 SV=1//6.01556e-24
Chr2	18025931	18026200	270	Promoter (1-2kb)	18025721	18027431	1711	-	LOC_Os02g30300	1231	sp|Q9FYF9|FB76_ARATH F-box protein At1g67340 OS=Arabidopsis thaliana GN=At1g67340 PE=1 SV=1//6.01009e-67
Chr2	18040614	18040828	215	Promoter (1-2kb)	18039129	18049883	10755	+	LOC_Os02g30310	1485	sp|Q6K6K7|UBA5_ORYSJ Ubiquitin-like modifier-activating enzyme 5 OS=Oryza sativa subsp. japonica GN=Os02g0506500 PE=2 SV=1//0
Chr2	18142458	18142690	233	Promoter (<=1kb)	18139064	18142753	3690	-	LOC_Os02g30460	63	sp|Q9SMN1|GCAL2_ARATH Gamma carbonic anhydrase-like 2, mitochondrial OS=Arabidopsis thaliana GN=GAMMACAL2 PE=1 SV=1//1.58228e-126
Chr2	18371853	18372304	452	Promoter (<=1kb)	18371442	18372892	1451	-	LOC_Os02g30810	588	sp|O64538|SAU40_ARATH Auxin-responsive protein SAUR40 OS=Arabidopsis thaliana GN=SAUR40 PE=2 SV=1//2.89515e-06
Chr2	18414588	18414783	196	Promoter (<=1kb)	18414297	18415361	1065	+	LOC_Os02g30850	291	sp|Q6K609|GRXC3_ORYSJ Glutaredoxin-C3 OS=Oryza sativa subsp. japonica GN=GRXC3 PE=2 SV=1//2.37911e-35
Chr2	18608847	18609113	267	Promoter (<=1kb)	18605013	18609088	4076	-	LOC_Os02g31120	0	sp|P08548|LIN1_NYCCO LINE-1 reverse transcriptase homolog OS=Nycticebus coucang PE=3 SV=1//2.68124e-17
Chr2	18987115	18987394	280	Promoter (1-2kb)	18986678	18988855	2178	-	LOC_Os02g32140	1461	sp|Q9LYU3|EF113_ARATH Ethylene-responsive transcription factor ERF113 OS=Arabidopsis thaliana GN=ERF113 PE=2 SV=1//6.75543e-22
Chr2	19000613	19000830	218	Promoter (<=1kb)	18994014	19001080	7067	-	LOC_Os02g32160	250	sp|Q941L3|BON1_ARATH Protein BONZAI 1 OS=Arabidopsis thaliana GN=BON1 PE=1 SV=2//0
Chr2	19279908	19280279	372	Promoter (<=1kb)	19277045	19279152	2108	-	LOC_Os02g32560	-756	sp|P11369|LORF2_MOUSE LINE-1 retrotransposable element ORF2 protein OS=Mus musculus GN=Pol PE=1 SV=2//4.37485e-31
Chr2	19331754	19331949	196	Promoter (<=1kb)	19324219	19332129	7911	-	LOC_Os02g32610	180	sp|Q05609|CTR1_ARATH Serine/threonine-protein kinase CTR1 OS=Arabidopsis thaliana GN=CTR1 PE=1 SV=1//0
Chr2	19343000	19343195	196	Promoter (<=1kb)	19342027	19343736	1710	+	LOC_Os02g32620	973	sp|Q9LZR8|Y5370_ARATH PAN domain-containing protein At5g03700 OS=Arabidopsis thaliana GN=At5g03700 PE=1 SV=1//9.30253e-101
Chr2	19628241	19628573	333	Promoter (<=1kb)	19623033	19628774	5742	-	LOC_Os02g33010	201	sp|Q8GW20|Y5390_ARATH Uncharacterized protein At5g03900, chloroplastic OS=Arabidopsis thaliana GN=At5g03900 PE=2 SV=2//1.74837e-178
Chr2	19629348	19629720	373	Promoter (<=1kb)	19623033	19628774	5742	-	LOC_Os02g33010	-574	sp|Q8GW20|Y5390_ARATH Uncharacterized protein At5g03900, chloroplastic OS=Arabidopsis thaliana GN=At5g03900 PE=2 SV=2//1.74837e-178
Chr2	19772612	19773432	821	Promoter (<=1kb)	19771302	19773389	2088	-	LOC_Os02g33270	0	sp|Q09575|YRD6_CAEEL Uncharacterized protein K02A2.6 OS=Caenorhabditis elegans GN=K02A2.6 PE=3 SV=1//4.20324e-15
Chr2	19920959	19921161	203	Promoter (<=1kb)	19912292	19921107	8816	-	LOC_Os02g33490	0	sp|Q9FWR2|AVPX_ARATH Pyrophosphate-energized membrane proton pump 3 OS=Arabidopsis thaliana GN=AVPL2 PE=3 SV=1//0
Chr2	20017374	20017623	250	Promoter (<=1kb)	20017093	20022128	5036	+	LOC_Os02g33620	281	sp|P10978|POLX_TOBAC Retrovirus-related Pol polyprotein from transposon TNT 1-94 OS=Nicotiana tabacum PE=2 SV=1//3.20549e-08
Chr2	20082809	20083511	703	Promoter (<=1kb)	20082159	20083676	1518	+	LOC_Os02g33680	650	sp|Q9LSA6|PUB29_ARATH U-box domain-containing protein 29 OS=Arabidopsis thaliana GN=PUB29 PE=1 SV=1//4.64172e-21
Chr2	20140942	20141378	437	Promoter (<=1kb)	20135508	20140728	5221	-	LOC_Os02g33750	-214	sp|Q9SZL8|FRS5_ARATH Protein FAR1-RELATED SEQUENCE 5 OS=Arabidopsis thaliana GN=FRS5 PE=2 SV=1//2.91566e-81
Chr2	20491628	20491823	196	Promoter (<=1kb)	20491113	20491868	756	-	LOC_Os02g34260	45	sp|Q9LYU3|EF113_ARATH Ethylene-responsive transcription factor ERF113 OS=Arabidopsis thaliana GN=ERF113 PE=2 SV=1//2.53882e-16
Chr2	20588517	20588793	277	Promoter (<=1kb)	20588271	20589687	1417	-	LOC_Os02g34410	894	sp|Q9FXA4|PUB26_ARATH U-box domain-containing protein 26 OS=Arabidopsis thaliana GN=PUB26 PE=2 SV=1//3.13944e-08
Chr2	20741412	20741758	347	Promoter (<=1kb)	20737912	20741031	3120	-	LOC_Os02g34590	-381	sp|Q9SZL8|FRS5_ARATH Protein FAR1-RELATED SEQUENCE 5 OS=Arabidopsis thaliana GN=FRS5 PE=2 SV=1//3.27632e-71
Chr2	20862091	20862311	221	Promoter (<=1kb)	20857044	20861343	4300	-	LOC_Os02g34790	-748	sp|Q8VZG8|Y4885_ARATH Probable LRR receptor-like serine/threonine-protein kinase At4g08850 OS=Arabidopsis thaliana GN=At4g08850 PE=2 SV=3//3.32359e-46
Chr2	20936229	20936687	459	Promoter (1-2kb)	20938159	20946232	8074	+	LOC_Os02g34900	-1472	sp|Q8BR93|HARB1_MOUSE Putative nuclease HARBI1 OS=Mus musculus GN=Harbi1 PE=2 SV=1//6.6887e-09
Chr2	21007768	21007963	196	Promoter (<=1kb)	21002129	21008409	6281	-	LOC_Os02g35010	446	sp|Q9CAD5|YODA_ARATH Mitogen-activated protein kinase kinase kinase YODA OS=Arabidopsis thaliana GN=YDA PE=1 SV=1//4.30761e-117
Chr2	21073309	21073715	407	Promoter (<=1kb)	21073952	21075232	1281	+	LOC_Os02g35110	-237	sp|Q9SMR2|TBCC_ARATH Tubulin-folding cofactor C OS=Arabidopsis thaliana GN=TFCC PE=1 SV=1//2.86767e-66
Chr2	21122265	21122539	275	Promoter (<=1kb)	21122299	21125134	2836	+	LOC_Os02g35170	0	sp|Q9SY73|PTALR_ARATH NADPH-dependent pterin aldehyde reductase OS=Arabidopsis thaliana GN=At1g10310 PE=1 SV=1//4.89055e-81
Chr2	21184268	21184607	340	Promoter (<=1kb)	21184134	21184646	513	-	LOC_Os02g35240	39	sp|Q9C9I2|ERF21_ARATH Ethylene-responsive transcription factor ERF021 OS=Arabidopsis thaliana GN=ERF021 PE=2 SV=1//3.94532e-13
Chr2	21365829	21366103	275	Promoter (<=1kb)	21365614	21366789	1176	+	LOC_Os02g35530	215	sp|O80582|FBK46_ARATH F-box/kelch-repeat protein At2g44130 OS=Arabidopsis thaliana GN=At2g44130 PE=2 SV=2//5.17138e-30
Chr2	21596269	21596724	456	Promoter (<=1kb)	21596645	21602520	5876	+	LOC_Os02g35950	0	sp|Q9LEB3|RBP47_NICPL Polyadenylate-binding protein RBP47 OS=Nicotiana plumbaginifolia GN=RBP47 PE=1 SV=1//3.00135e-119
Chr2	21666377	21666930	554	Promoter (<=1kb)	21666558	21667796	1239	+	LOC_Os02g36040	0	sp|Q9FLY5|GNL1_ARATH ARF guanine-nucleotide exchange factor GNL1 OS=Arabidopsis thaliana GN=GNL1 PE=3 SV=1//9.53873e-06
Chr2	21719867	21720153	287	Promoter (2-3kb)	21722279	21729346	7068	+	LOC_Os02g36100	-2126	sp|P0CT40|TF29_SCHPO Transposon Tf2-9 polyprotein OS=Schizosaccharomyces pombe (strain 972 / ATCC 24843) GN=Tf2-9 PE=3 SV=1//2.01898e-142
Chr2	21901480	21901783	304	Promoter (2-3kb)	21886310	21899230	12921	-	LOC_Os02g36264	-2250	sp|A4KAG8|KSL6_ORYSJ Ent-isokaur-15-ene synthase OS=Oryza sativa subsp. japonica GN=KSL6 PE=1 SV=2//0
Chr2	21918072	21918374	303	Promoter (<=1kb)	21917368	21918679	1312	+	LOC_Os02g36300	704	sp|Q8RXX9|ATL6_ARATH E3 ubiquitin-protein ligase ATL6 OS=Arabidopsis thaliana GN=ATL6 PE=1 SV=2//2.06031e-18
Chr2	21925974	21926264	291	Promoter (2-3kb)	21922917	21923963	1047	-	LOC_Os02g36320	-2011	sp|Q8RXX9|ATL6_ARATH E3 ubiquitin-protein ligase ATL6 OS=Arabidopsis thaliana GN=ATL6 PE=1 SV=2//3.53648e-30
Chr2	21991156	21991351	196	Promoter (<=1kb)	21986707	21991419	4713	-	LOC_Os02g36400	68	sp|O24454|UBP3_ARATH Ubiquitin carboxyl-terminal hydrolase 3 OS=Arabidopsis thaliana GN=UBP3 PE=1 SV=1//0
Chr2	22192991	22193698	708	Promoter (<=1kb)	22193367	22199300	5934	+	LOC_Os02g36800	0	sp|P10978|POLX_TOBAC Retrovirus-related Pol polyprotein from transposon TNT 1-94 OS=Nicotiana tabacum PE=2 SV=1//2.47631e-164
Chr2	22237755	22237950	196	Promoter (<=1kb)	22237014	22237403	390	-	LOC_Os02g36860	-352	sp|Q8LCU7|MECR_ARATH Probable trans-2-enoyl-CoA reductase, mitochondrial OS=Arabidopsis thaliana GN=At3g45770 PE=2 SV=1//3.0357e-32
Chr2	22259893	22260120	228	Promoter (<=1kb)	22258915	22260681	1767	+	LOC_Os02g36880	978	sp|Q9FLJ2|NC100_ARATH NAC domain-containing protein 100 OS=Arabidopsis thaliana GN=NAC100 PE=2 SV=1//2.89844e-78
Chr2	22269229	22269669	441	Promoter (1-2kb)	22267920	22270242	2323	+	LOC_Os02g36890	1309	sp|Q8GWP0|MYB39_ARATH Transcription factor MYB39 OS=Arabidopsis thaliana GN=MYB39 PE=2 SV=1//2.33638e-65
Chr2	22331642	22331837	196	Promoter (<=1kb)	22327294	22331805	4512	-	LOC_Os02g36960	0	sp|Q869R1|CTLHB_DICDI CTL-like protein DDB_G0274487 OS=Dictyostelium discoideum GN=DDB_G0274487 PE=3 SV=1//3.0178e-27
Chr2	22381132	22381332	201	Promoter (<=1kb)	22381199	22390006	8808	+	LOC_Os02g37050	0	sp|P36051|MCD4_YEAST GPI ethanolamine phosphate transferase 1 OS=Saccharomyces cerevisiae (strain ATCC 204508 / S288c) GN=MCD4 PE=1 SV=1//1.48083e-07
Chr2	22799572	22799769	198	Promoter (<=1kb)	22797600	22798855	1256	-	LOC_Os02g37790	-717	sp|P10978|POLX_TOBAC Retrovirus-related Pol polyprotein from transposon TNT 1-94 OS=Nicotiana tabacum PE=2 SV=1//1.47087e-53
Chr2	22957925	22958176	252	Promoter (<=1kb)	22957785	22962964	5180	+	LOC_Os02g38000	140	sp|P10978|POLX_TOBAC Retrovirus-related Pol polyprotein from transposon TNT 1-94 OS=Nicotiana tabacum PE=2 SV=1//7.94648e-57
Chr2	22989986	22990269	284	Promoter (<=1kb)	22990616	22995388	4773	+	LOC_Os02g38060	-347	sp|Q84JC0|RRP8_ARATH Ribosomal RNA-processing protein 8 OS=Arabidopsis thaliana GN=At5g40530 PE=2 SV=1//1.26885e-21
Chr2	23143509	23143836	328	Promoter (1-2kb)	23142015	23144272	2258	+	LOC_Os02g38260	1494	sp|P23548|GUN_PAEPO Endoglucanase OS=Paenibacillus polymyxa PE=3 SV=2//1.10041e-06
Chr2	23154611	23154806	196	Promoter (<=1kb)	23152689	23154879	2191	-	LOC_Os02g38290	73	sp|Q9FMY1|C86B1_ARATH Cytochrome P450 86B1 OS=Arabidopsis thaliana GN=CYP86B1 PE=2 SV=1//1.60241e-146
Chr2	23173089	23173354	266	Promoter (<=1kb)	23172608	23174693	2086	+	LOC_Os02g38320	481	sp|Q9FMK7|BT1_ARATH BTB/POZ and TAZ domain-containing protein 1 OS=Arabidopsis thaliana GN=BT1 PE=1 SV=1//4.78644e-21
Chr2	23244409	23244604	196	Promoter (<=1kb)	23241627	23244640	3014	-	LOC_Os02g38440	36	sp|Q8L9C4|KCR1_ARATH Very-long-chain 3-oxoacyl-CoA reductase 1 OS=Arabidopsis thaliana GN=KCR1 PE=1 SV=1//5.65833e-111
Chr2	23309532	23309727	196	Promoter (1-2kb)	23311021	23312748	1728	+	LOC_Os02g38560	-1294	sp|O92815|POL_WDSV Gag-Pol polyprotein OS=Walleye dermal sarcoma virus GN=gag-pol PE=1 SV=2//4.73224e-16
Chr2	23357878	23358088	211	Promoter (<=1kb)	23357803	23362312	4510	+	LOC_Os02g38650	75	sp|P0CT40|TF29_SCHPO Transposon Tf2-9 polyprotein OS=Schizosaccharomyces pombe (strain 972 / ATCC 24843) GN=Tf2-9 PE=3 SV=1//1.33451e-149
Chr2	23533028	23533223	196	Promoter (<=1kb)	23531392	23533277	1886	-	LOC_Os02g38930	54	sp|O81971|C71D9_SOYBN Cytochrome P450 71D9 OS=Glycine max GN=CYP71D9 PE=2 SV=1//2.8603e-67
Chr2	23582275	23582568	294	Promoter (<=1kb)	23581962	23583826	1865	+	LOC_Os02g39060	313	sp|O80678|UBA2B_ARATH UBP1-associated protein 2B OS=Arabidopsis thaliana GN=UBA2B PE=2 SV=1//5.55423e-36
Chr2	23614144	23614339	196	Promoter (<=1kb)	23612002	23614519	2518	-	LOC_Os02g39100	180	sp|Q940E8|FEA2_MAIZE Leucine-rich repeat receptor-like protein FASCIATED EAR2 OS=Zea mays GN=FEA2 PE=1 SV=1//0
Chr2	23615204	23615493	290	Promoter (<=1kb)	23612002	23614519	2518	-	LOC_Os02g39100	-685	sp|Q940E8|FEA2_MAIZE Leucine-rich repeat receptor-like protein FASCIATED EAR2 OS=Zea mays GN=FEA2 PE=1 SV=1//0
Chr2	23662730	23662971	242	Promoter (1-2kb)	23662619	23664459	1841	-	LOC_Os02g39170	1488	sp|Q9FXJ1|GDL6_ARATH GDSL esterase/lipase At1g28570 OS=Arabidopsis thaliana GN=At1g28570 PE=2 SV=1//4.05395e-44
Chr2	23835228	23835547	320	Promoter (<=1kb)	23829190	23834725	5536	-	LOC_Os02g39490	-503	sp|Q9M2E2|SDR1_ARATH (+)-neomenthol dehydrogenase OS=Arabidopsis thaliana GN=SDR1 PE=1 SV=1//4.30027e-42
Chr2	23990006	23990229	224	Promoter (<=1kb)	23989750	23991293	1544	+	LOC_Os02g39710	256	sp|Q9SK53|COL3_ARATH Zinc finger protein CONSTANS-LIKE 3 OS=Arabidopsis thaliana GN=COL3 PE=1 SV=1//4.01367e-37
Chr2	24090935	24091143	209	Promoter (<=1kb)	24090940	24094271	3332	+	LOC_Os02g39870	0	sp|Q8DJB3|GRPE_THEEB Protein GrpE OS=Thermosynechococcus elongatus (strain BP-1) GN=grpE PE=3 SV=1//2.72921e-42
Chr2	24158523	24158733	211	Promoter (2-3kb)	24154021	24156450	2430	-	LOC_Os02g39940	-2073	sp|P42733|RS113_ARATH 40S ribosomal protein S11-3 OS=Arabidopsis thaliana GN=RPS11C PE=2 SV=2//4.7153e-11
Chr2	24339755	24340207	453	Promoter (<=1kb)	24335043	24338983	3941	-	LOC_Os02g40230	-772	sp|P10978|POLX_TOBAC Retrovirus-related Pol polyprotein from transposon TNT 1-94 OS=Nicotiana tabacum PE=2 SV=1//9.59933e-09
Chr2	24340376	24340680	305	Promoter (1-2kb)	24335043	24338983	3941	-	LOC_Os02g40230	-1393	sp|P10978|POLX_TOBAC Retrovirus-related Pol polyprotein from transposon TNT 1-94 OS=Nicotiana tabacum PE=2 SV=1//9.59933e-09
Chr2	24569894	24570022	129	Downstream (<1kb)	24569489	24572391	2903	+	LOC_Os02g40510	401	TIMING OF CAB EXPRESSION 1, Pseudo-Response Regulator 1, Two-component response regulator-like PRR1, Pseudo-response regulator 1, A-type RR 21, CCT domain-containing gene 7, CCT (CO, CO-LIKE and TOC1) domain protein 7, CCT domain protein 7
Chr2	24899509	24899800	292	Promoter (<=1kb)	24899523	24905062	5540	+	LOC_Os02g41520	0	sp|Q8GWB7|GUX6_ARATH Inositol phosphorylceramide glucuronosyltransferase 1 OS=Arabidopsis thaliana GN=IPUT1 PE=1 SV=1//0
Chr2	24935267	24935565	299	Promoter (<=1kb)	24934934	24936468	1535	+	LOC_Os02g41580	333	sp|Q9SPK4|PPCK1_ARATH Phosphoenolpyruvate carboxylase kinase 1 OS=Arabidopsis thaliana GN=PPCK1 PE=1 SV=1//6.51143e-62
Chr2	25001561	25001771	211	Distal Intergenic	24992827	24995414	2588	-	LOC_Os02g41670	-6147	sp|A2X7F7|PAL2_ORYSI Phenylalanine ammonia-lyase OS=Oryza sativa subsp. indica GN=ZB8 PE=3 SV=1//0
Chr2	25008817	25008893	77	Downstream (<=1kb)	25006495	25009018	2534	-	LOC_Os02g41680	100	PHENYLALANINE AMMONIA-LYASE 1, phenylalanine ammonia-lyase 1, phenylalanine ammonia lyase
Chr2	25399833	25400083	251	Promoter (<=1kb)	25399803	25404333	4531	+	LOC_Os02g42220	30	sp|Q6H7J6|YSL14_ORYSJ Probable metal-nicotianamine transporter YSL14 OS=Oryza sativa subsp. japonica GN=YSL14 PE=2 SV=1//0
Chr2	25409319	25409514	196	Promoter (<=1kb)	25404409	25408368	3960	-	LOC_Os02g42230	-951	sp|Q6H7J5|RFA2B_ORYSJ Replication protein A 32 kDa subunit B OS=Oryza sativa subsp. japonica GN=RPA2B PE=1 SV=1//0
Chr2	25428674	25428958	285	Promoter (2-3kb)	25423693	25426421	2729	-	LOC_Os02g42280	-2253	sp|Q9LHJ2|U82A1_ARATH UDP-glycosyltransferase 82A1 OS=Arabidopsis thaliana GN=UGT82A1 PE=2 SV=1//5.21049e-102
Chr2	25431287	25431577	291	Promoter (<=1kb)	25431277	25433819	2543	+	LOC_Os02g42290	10	sp|Q9X6W8|CLPP_AZOBR ATP-dependent Clp protease proteolytic subunit OS=Azospirillum brasilense GN=clpP PE=3 SV=1//2.38763e-82
Chr2	25517024	25517219	196	Promoter (1-2kb)	25514508	25515647	1140	-	LOC_Os02g42412	-1377	sp|Q8BH16|FBXL2_MOUSE F-box/LRR-repeat protein 2 OS=Mus musculus GN=Fbxl2 PE=1 SV=1//4.19214e-09
Chr2	25742646	25742915	270	Promoter (1-2kb)	25739666	25741262	1597	-	LOC_Os02g42820	-1384	sp|Q500W4|PLI2C_ARATH LIM domain-containing protein PLIM2c OS=Arabidopsis thaliana GN=PLIM2C PE=1 SV=1//4.32877e-24
Chr2	25816162	25816427	266	Promoter (<=1kb)	25815928	25820880	4953	+	LOC_Os02g42920	234	sp|Q5E9Q1|PGLT1_BOVIN Protein O-glucosyltransferase 1 OS=Bos taurus GN=POGLUT1 PE=2 SV=1//3.10377e-30
Chr2	25855645	25855840	196	Promoter (<=1kb)	25855532	25859143	3612	+	LOC_Os02g42960	113	sp|Q8H1Q1|TL225_ARATH Thylakoid lumenal protein At1g12250, chloroplastic OS=Arabidopsis thaliana GN=At1g12250 PE=1 SV=1//7.88915e-103
Chr2	25879375	25879643	269	Promoter (<=1kb)	25878901	25879880	980	+	LOC_Os02g42990	474	sp|O22150|SAU36_ARATH Auxin-responsive protein SAUR36 OS=Arabidopsis thaliana GN=SAUR36 PE=2 SV=1//8.4018e-18
Chr2	25910206	25910401	196	Promoter (<=1kb)	25909939	25910909	971	-	LOC_Os02g43030	508	sp|Q6H658|VITH1_ORYSJ Vacuolar iron transporter homolog 1 OS=Oryza sativa subsp. japonica GN=Os02g0644200 PE=2 SV=1//1.09361e-89
Chr2	25910515	25910710	196	Promoter (<=1kb)	25909939	25910909	971	-	LOC_Os02g43030	199	sp|Q6H658|VITH1_ORYSJ Vacuolar iron transporter homolog 1 OS=Oryza sativa subsp. japonica GN=Os02g0644200 PE=2 SV=1//1.09361e-89
Chr2	25968145	25968359	215	Promoter (<=1kb)	25967752	25968734	983	-	LOC_Os02g43120	375	sp|Q9SG96|ATL72_ARATH RING-H2 finger protein ATL72 OS=Arabidopsis thaliana GN=ATL72 PE=2 SV=1//3.4804e-13
Chr2	26053273	26053468	196	Promoter (<=1kb)	26052820	26054216	1397	-	LOC_Os02g43250	748	sp|C0LGQ5|GSO1_ARATH LRR receptor-like serine/threonine-protein kinase GSO1 OS=Arabidopsis thaliana GN=GSO1 PE=2 SV=1//9.90643e-13
Chr2	26153786	26154007	222	Promoter (2-3kb)	26156276	26162463	6188	+	LOC_Os02g43350	-2269	sp|Q6H6R9|FTSH7_ORYSJ ATP-dependent zinc metalloprotease FTSH 7, chloroplastic OS=Oryza sativa subsp. japonica GN=FTSH7 PE=3 SV=1//0
Chr2	26233119	26233314	196	Promoter (<=1kb)	26232908	26238290	5383	+	LOC_Os02g43460	211	sp|F4I8S3|CLSY3_ARATH SNF2 domain-containing protein CLASSY 3 OS=Arabidopsis thaliana GN=CLSY3 PE=1 SV=1//0
Chr2	26253280	26253546	267	Promoter (<=1kb)	26253018	26253744	727	-	LOC_Os02g43510	198	sp|Q67WR5|FCL2_ORYSJ Putative GDP-L-fucose synthase 2 OS=Oryza sativa subsp. japonica GN=Os06g0652300 PE=3 SV=1//2.53466e-50
Chr2	26277356	26277561	206	Promoter (<=1kb)	26275370	26277684	2315	-	LOC_Os02g43550	123	sp|Q7XC35|CCP41_ORYSJ Cyclin-P4-1 OS=Oryza sativa subsp. japonica GN=CYCP4-1 PE=2 SV=1//1.37997e-59
Chr2	26353163	26353358	196	Promoter (<=1kb)	26348650	26353479	4830	-	LOC_Os02g43670	121	sp|Q9LIS1|CR26L_ARATH Protein ECERIFERUM 26-like OS=Arabidopsis thaliana GN=CER26L PE=2 SV=1//1.83719e-09
Chr2	26551326	26551573	248	Promoter (<=1kb)	26550915	26552218	1304	+	LOC_Os02g43970	411	sp|Q8LBQ7|ERF34_ARATH Ethylene-responsive transcription factor ERF034 OS=Arabidopsis thaliana GN=ERF034 PE=2 SV=2//2.59916e-34
Chr2	26635975	26636312	338	Promoter (2-3kb)	26638624	26639988	1365	+	LOC_Os02g44106	-2312	sp|Q6H677|EXB14_ORYSJ Putative expansin-B14 OS=Oryza sativa subsp. japonica GN=EXPB14 PE=3 SV=1//0
Chr2	26716988	26717183	196	Promoter (<=1kb)	26709629	26717517	7889	-	LOC_Os02g44136	334	sp|P10978|POLX_TOBAC Retrovirus-related Pol polyprotein from transposon TNT 1-94 OS=Nicotiana tabacum PE=2 SV=1//1.2291e-32
Chr2	26718250	26718580	331	Promoter (<=1kb)	26709629	26717517	7889	-	LOC_Os02g44136	-733	sp|P10978|POLX_TOBAC Retrovirus-related Pol polyprotein from transposon TNT 1-94 OS=Nicotiana tabacum PE=2 SV=1//1.2291e-32
Chr2	26850482	26850774	293	Promoter (1-2kb)	26852079	26855064	2986	+	LOC_Os02g44370	-1305	sp|O81316|SCL6_ARATH Scarecrow-like protein 6 OS=Arabidopsis thaliana GN=SCL6 PE=1 SV=1//3.62653e-86
Chr2	27134709	27134961	253	Promoter (<=1kb)	27134555	27136740	2186	+	LOC_Os02g44810	154	sp|Q9WU56|TRUA_MOUSE tRNA pseudouridine synthase A, mitochondrial OS=Mus musculus GN=Pus1 PE=1 SV=2//1.23971e-29
Chr2	27384883	27385525	643	Promoter (1-2kb)	27386916	27388941	2026	+	LOC_Os02g45150	-1391	sp|O23086|ALMTA_ARATH Aluminum-activated malate transporter 10 OS=Arabidopsis thaliana GN=ALMT10 PE=3 SV=2//1.41921e-47
Chr2	27437115	27437310	196	Promoter (<=1kb)	27435303	27437497	2195	-	LOC_Os02g45200	187	sp|Q8LAP8|DOF46_ARATH Dof zinc finger protein DOF4.6 OS=Arabidopsis thaliana GN=DOF4.6 PE=2 SV=2//1.9564e-37
Chr2	27484238	27484434	197	Promoter (<=1kb)	27480263	27484487	4225	-	LOC_Os02g45240	53	sp|Q93Z92|RING4_ARATH E3 ubiquitin-protein ligase At4g11680 OS=Arabidopsis thaliana GN=At4g11680 PE=2 SV=1//8.45334e-129
Chr2	27653123	27653318	196	Promoter (<=1kb)	27652935	27654206	1272	+	LOC_Os02g45450	188	sp|Q6EP77|DRE1G_ORYSJ Dehydration-responsive element-binding protein 1G OS=Oryza sativa subsp. japonica GN=DREB1G PE=2 SV=1//2.69609e-109
Chr2	27739577	27739907	331	Promoter (1-2kb)	27735847	27740939	5093	-	LOC_Os02g45590	1032	sp|Q9S7R4|PP125_ARATH Pentatricopeptide repeat-containing protein At1g74900, mitochondrial OS=Arabidopsis thaliana GN=OTP43 PE=2 SV=1//1.86812e-134
Chr2	27837587	27837841	255	Promoter (<=1kb)	27837634	27841235	3602	+	LOC_Os02g45750	0	sp|O22808|LYK5_ARATH Protein LYK5 OS=Arabidopsis thaliana GN=LYK5 PE=2 SV=1//3.9706e-49
Chr2	27887578	27887796	219	Promoter (<=1kb)	27886977	27888250	1274	-	LOC_Os02g45780	454	sp|Q9SI09|XERIC_ARATH Probable E3 ubiquitin-protein ligase XERICO OS=Arabidopsis thaliana GN=XERICO PE=1 SV=1//3.26767e-09
Chr2	27965818	27966199	382	Promoter (<=1kb)	27965593	27966300	708	+	LOC_Os02g45880	225	sp|Q9LS48|SG1_ARATH protein SLOW GREEN 1, chloroplastic OS=Arabidopsis thaliana GN=SG1 PE=1 SV=1//3.86647e-10
Chr2	28259871	28260156	286	Promoter (1-2kb)	28261585	28264101	2517	+	LOC_Os02g46370	-1429	sp|O24606|EIN3_ARATH Protein ETHYLENE INSENSITIVE 3 OS=Arabidopsis thaliana GN=EIN3 PE=1 SV=1//6.29844e-49
Chr2	28557305	28557655	351	Promoter (1-2kb)	28555794	28556234	441	+	LOC_Os02g46770	1511	sp|C0LGS3|Y4372_ARATH Probable LRR receptor-like serine/threonine-protein kinase At4g37250 OS=Arabidopsis thaliana GN=At4g37250 PE=2 SV=1//2.90713e-08
Chr2	28683338	28683789	452	Promoter (<=1kb)	28681681	28683849	2169	-	LOC_Os02g46980	60	sp|Q9C6T2|PPR68_ARATH Pentatricopeptide repeat-containing protein At1g31920 OS=Arabidopsis thaliana GN=PCMP-H11 PE=2 SV=1//0
Chr2	28707342	28707559	218	Promoter (<=1kb)	28706487	28708073	1587	+	LOC_Os02g47040	855	sp|Q8GT20|BEBT_TOBAC Benzyl alcohol O-benzoyltransferase OS=Nicotiana tabacum GN=HSR201 PE=1 SV=1//4.93004e-26
Chr2	28707658	28707853	196	Promoter (1-2kb)	28706487	28708073	1587	+	LOC_Os02g47040	1171	sp|Q8GT20|BEBT_TOBAC Benzyl alcohol O-benzoyltransferase OS=Nicotiana tabacum GN=HSR201 PE=1 SV=1//4.93004e-26
Chr2	28760016	28760245	230	Promoter (<=1kb)	28759900	28767285	7386	+	LOC_Os02g47120	116	sp|Q9SYH1|RSH3C_ARATH Probable GTP diphosphokinase RSH3, chloroplastic OS=Arabidopsis thaliana GN=RSH3 PE=2 SV=1//9.23627e-26
Chr2	28841699	28841916	218	Promoter (<=1kb)	28838820	28842111	3292	-	LOC_Os02g47260	195	sp|P08361|POL_MLVCB Gag-Pol polyprotein (Fragment) OS=Cas-Br-E murine leukemia virus GN=gag-pol PE=3 SV=1//1.07231e-20
Chr2	29064654	29065045	392	Promoter (2-3kb)	29059281	29062623	3343	-	LOC_Os02g47560	-2031	sp|Q9EQN5|SMBP2_RAT DNA-binding protein SMUBP-2 OS=Rattus norvegicus GN=Ighmbp2 PE=1 SV=1//1.55974e-102
Chr2	29078320	29078587	268	Promoter (<=1kb)	29078261	29081262	3002	+	LOC_Os02g47590	59	sp|Q43814|OTC_PEA Ornithine carbamoyltransferase, chloroplastic OS=Pisum sativum GN=ARGF PE=2 SV=1//0
Chr2	29153893	29154171	279	Promoter (2-3kb)	29156332	29161847	5516	+	LOC_Os02g47690	-2161	sp|P0CT39|TF26_SCHPO Transposon Tf2-6 polyprotein OS=Schizosaccharomyces pombe (strain 972 / ATCC 24843) GN=Tf2-6 PE=3 SV=1//9.20039e-139
Chr2	29181336	29181560	225	Promoter (<=1kb)	29174341	29181998	7658	-	LOC_Os02g47730	438	sp|Q99315|YG31B_YEAST Transposon Ty3-G Gag-Pol polyprotein OS=Saccharomyces cerevisiae (strain ATCC 204508 / S288c) GN=TY3B-G PE=1 SV=3//4.18624e-11
Chr2	29188050	29188283	234	Promoter (2-3kb)	29190320	29195573	5254	+	LOC_Os02g47744	-2037	sp|Q6NNN0|RADL3_ARATH Protein RADIALIS-like 3 OS=Arabidopsis thaliana GN=RL3 PE=2 SV=1//9.49722e-18
Chr2	29226943	29227178	236	Promoter (<=1kb)	29223873	29226327	2455	-	LOC_Os02g47780	-616	sp|P24640|LIP3_MORS1 Lipase 3 OS=Moraxella sp. (strain TA144) GN=lip3 PE=1 SV=1//4.92253e-07
Chr2	29438569	29438785	217	Promoter (<=1kb)	29438332	29440658	2327	+	LOC_Os02g48094	237	sp|Q9SUC9|UGPI7_ARATH Uncharacterized GPI-anchored protein At4g28100 OS=Arabidopsis thaliana GN=At4g28100 PE=1 SV=1//3.45956e-13
Chr2	29465442	29465651	210	Promoter (<=1kb)	29463827	29465660	1834	-	LOC_Os02g48122	9	sp|Q3EAF8|PP294_ARATH Pentatricopeptide repeat-containing protein At3g62540, mitochondrial OS=Arabidopsis thaliana GN=At3g62540 PE=2 SV=1//1.62804e-24
Chr2	29572744	29573016	273	Promoter (<=1kb)	29571739	29573542	1804	-	LOC_Os02g48320	526	sp|Q6DBQ1|AHL25_ARATH AT-hook motif nuclear-localized protein 25 OS=Arabidopsis thaliana GN=AHL25 PE=1 SV=1//1.34498e-27
Chr2	29914550	29914745	196	Promoter (<=1kb)	29913753	29916317	2565	+	LOC_Os02g48900	797	sp|Q9LS40|ASPG1_ARATH Protein ASPARTIC PROTEASE IN GUARD CELL 1 OS=Arabidopsis thaliana GN=ASPG1 PE=1 SV=1//2.63732e-65
Chr2	30052759	30052954	196	Promoter (1-2kb)	30051597	30053366	1770	+	LOC_Os02g49140	1162	sp|Q564G7|GMGT1_CYATE Galactomannan galactosyltransferase 1 OS=Cyamopsis tetragonoloba GN=GMGT1 PE=1 SV=1//4.37776e-143
Chr2	30143187	30143507	321	Promoter (<=1kb)	30139655	30143452	3798	-	LOC_Os02g49320	0	sp|C5DDQ4|AIM32_LACTC Altered inheritance of mitochondria protein 32 OS=Lachancea thermotolerans (strain ATCC 56472 / CBS 6340 / NRRL Y-8284) GN=AIM32 PE=3 SV=1//6.2625e-17
Chr2	30159430	30159732	303	Promoter (<=1kb)	30159132	30161718	2587	+	LOC_Os02g49360	298	sp|Q66JJ4|TM10A_XENTR tRNA methyltransferase 10 homolog A OS=Xenopus tropicalis GN=trmt10a PE=2 SV=1//1.41643e-45
Chr2	30232038	30232273	236	Promoter (<=1kb)	30232042	30232725	684	+	LOC_Os02g49470	0	sp|Q9FM67|TI205_ARATH Protein TIC 20-v, chloroplastic OS=Arabidopsis thaliana GN=TIC20-V PE=2 SV=1//1.26262e-49
Chr2	30668214	30668409	196	Promoter (<=1kb)	30669185	30673105	3921	+	LOC_Os02g50230	-776	sp|Q9P7G4|OMA1_SCHPO Mitochondrial metalloendopeptidase OMA1 OS=Schizosaccharomyces pombe (strain 972 / ATCC 24843) GN=oma1 PE=3 SV=1//1.99086e-26
Chr2	30695447	30695697	251	Promoter (<=1kb)	30695324	30698401	3078	+	LOC_Os02g50270	123	sp|Q9ZU96|Y2168_ARATH Ankyrin repeat-containing protein At2g01680 OS=Arabidopsis thaliana GN=At2g01680 PE=2 SV=1//0
Chr2	30703982	30704436	455	Promoter (<=1kb)	30701962	30703636	1675	-	LOC_Os02g50290	-346	sp|Q8GUU2|RIE1_ARATH E3 ubiquitin protein ligase RIE1 OS=Arabidopsis thaliana GN=RIE1 PE=2 SV=1//5.56954e-52
Chr2	30708914	30709109	196	Promoter (<=1kb)	30706842	30708480	1639	-	LOC_Os02g50310	-434	sp|P08770|TRA1_MAIZE Putative AC transposase OS=Zea mays PE=2 SV=2//3.67883e-15
Chr2	30749089	30749303	215	Promoter (<=1kb)	30745336	30749371	4036	-	LOC_Os02g50350	68	sp|Q9LVI9|DPYD_ARATH Dihydropyrimidine dehydrogenase (NADP(+)), chloroplastic OS=Arabidopsis thaliana GN=PYD1 PE=1 SV=1//0
Chr2	30807017	30807212	196	Promoter (<=1kb)	30805987	30807610	1624	-	LOC_Os02g50460	398	sp|Q9C8D1|PUB20_ARATH U-box domain-containing protein 20 OS=Arabidopsis thaliana GN=PUB20 PE=2 SV=1//1.08961e-59
Chr2	30933711	30934021	311	Promoter (<=1kb)	30930066	30934291	4226	-	LOC_Os02g50640	270	sp|Q9T041|MAPT_ARATH Microtubule-associated protein TORTIFOLIA1 OS=Arabidopsis thaliana GN=TOR1 PE=1 SV=2//9.99263e-10
Chr2	30989645	30989905	261	Promoter (<=1kb)	30989308	30991033	1726	+	LOC_Os02g50750	337	sp|Q9FLE8|Y5986_ARATH Uncharacterized protein At5g39865 OS=Arabidopsis thaliana GN=At5g39865 PE=2 SV=1//1.58905e-08
Chr2	31100801	31101168	368	Promoter (<=1kb)	31096163	31101189	5027	-	LOC_Os02g50880	21	sp|Q9FL12|DEGP9_ARATH Protease Do-like 9 OS=Arabidopsis thaliana GN=DEGP9 PE=1 SV=1//0
Chr2	31169798	31170091	294	Promoter (1-2kb)	31171936	31180182	8247	+	LOC_Os02g50970	-1845	sp|Q9FPR3|EDR1_ARATH Serine/threonine-protein kinase EDR1 OS=Arabidopsis thaliana GN=EDR1 PE=1 SV=1//2.42734e-45
Chr2	31417593	31417872	280	Promoter (<=1kb)	31416861	31417678	818	+	LOC_Os02g51310	732	sp|Q2QM59|PCF8_ORYSJ Transcription factor PCF8 OS=Oryza sativa subsp. japonica GN=PCF8 PE=2 SV=1//3.10134e-13
Chr2	31473021	31473254	234	Promoter (<=1kb)	31472969	31483034	10066	+	LOC_Os02g51400	52	sp|Q7ZZ25|ATD1A_DANRE ATPase family AAA domain-containing protein 1-A OS=Danio rerio GN=atad1a PE=2 SV=2//3.23252e-56
Chr2	31527009	31527265	257	Promoter (<=1kb)	31526920	31528529	1610	+	LOC_Os02g51470	89	sp|Q07300|ATPD_SORBI ATP synthase delta chain, chloroplastic OS=Sorghum bicolor GN=ATPD PE=2 SV=1//2.71821e-83
Chr2	31589037	31589234	198	Promoter (1-2kb)	31591221	31593152	1932	+	LOC_Os02g51570	-1987	sp|Q9SCY3|PNSL4_ARATH Photosynthetic NDH subunit of lumenal location 4, chloroplastic OS=Arabidopsis thaliana GN=PNSL4 PE=1 SV=1//2.08991e-58
Chr2	31825693	31825888	196	Promoter (<=1kb)	31823825	31825264	1440	-	LOC_Os02g51970	-429	sp|Q9ZPE7|EXO_ARATH Protein EXORDIUM OS=Arabidopsis thaliana GN=EXO PE=2 SV=1//1.67884e-109
Chr2	31882216	31882467	252	Promoter (<=1kb)	31877891	31883062	5172	-	LOC_Os02g52090	595	sp|Q7LHG5|YI31B_YEAST Transposon Ty3-I Gag-Pol polyprotein OS=Saccharomyces cerevisiae (strain ATCC 204508 / S288c) GN=TY3B-I PE=3 SV=2//3.49607e-43
Chr2	32265612	32266193	582	Promoter (1-2kb)	32261576	32267534	5959	-	LOC_Os02g52744	1341	sp|Q42463|DCL_SOLLC Protein DCL, chloroplastic OS=Solanum lycopersicum GN=DCL PE=2 SV=1//2.08566e-66
Chr2	32280824	32281091	268	Promoter (<=1kb)	32276591	32281653	5063	-	LOC_Os02g52780	562	sp|Q6ZDF3|TRAB1_ORYSJ bZIP transcription factor TRAB1 OS=Oryza sativa subsp. japonica GN=TRAB1 PE=1 SV=1//2.29577e-45
Chr2	32324652	32324897	246	Promoter (<=1kb)	32324316	32326103	1788	+	LOC_Os02g52870	336	sp|Q8LPN7|RNG1L_ARATH E3 ubiquitin-protein ligase RING1-like OS=Arabidopsis thaliana GN=At3g19950 PE=1 SV=1//9.82783e-29
Chr2	32683114	32683396	283	Promoter (<=1kb)	32684150	32686062	1913	+	LOC_Os02g53400	-754	sp|Q6Z7L3|TRL31_ORYSJ Thioredoxin-like 3-1, chloroplastic OS=Oryza sativa subsp. japonica GN=Os02g0774100 PE=3 SV=2//3.16017e-91
Chr2	32841526	32841784	259	Promoter (<=1kb)	32840362	32842456	2095	-	LOC_Os02g53690	672	sp|Q6AWY8|GRF1_ORYSJ Growth-regulating factor 1 OS=Oryza sativa subsp. japonica GN=GRF1 PE=3 SV=1//0
Chr2	33011135	33011401	267	Promoter (<=1kb)	33008514	33010586	2073	-	LOC_Os02g53910	-549	sp|O65351|SBT17_ARATH Subtilisin-like protease SBT1.7 OS=Arabidopsis thaliana GN=SBT1.7 PE=1 SV=1//8.3991e-171
Chr2	33053419	33053639	221	Promoter (<=1kb)	33054137	33066629	12493	+	LOC_Os02g53990	-498	sp|Q620W3|EFR3_CAEBR Protein EFR3 homolog OS=Caenorhabditis briggsae GN=CBG02625 PE=3 SV=1//1.94166e-10
Chr2	33107940	33108223	284	Promoter (<=1kb)	33107745	33108413	669	-	LOC_Os02g54050	190	sp|Q84QC2|ERF17_ARATH Ethylene-responsive transcription factor ERF017 OS=Arabidopsis thaliana GN=ERF017 PE=2 SV=1//4.67961e-29
Chr2	33117015	33117247	233	Promoter (<=1kb)	33114780	33117303	2524	-	LOC_Os02g54060	56	sp|O65282|CH10C_ARATH 20 kDa chaperonin, chloroplastic OS=Arabidopsis thaliana GN=CPN21 PE=1 SV=2//3.80066e-110
Chr2	33146977	33147306	330	Promoter (<=1kb)	33146903	33154107	7205	+	LOC_Os02g54110	74	sp|Q5ZKD5|RRP12_CHICK RRP12-like protein OS=Gallus gallus GN=RRP12 PE=2 SV=1//1.69221e-61
Chr2	33222928	33223374	447	Promoter (<=1kb)	33221268	33223595	2328	-	LOC_Os02g54190	221	sp|Q9SKX2|PME16_ARATH Probable pectinesterase/pectinesterase inhibitor 16 OS=Arabidopsis thaliana GN=PME16 PE=2 SV=1//2.83203e-127
Chr2	33405131	33405326	196	Promoter (<=1kb)	33405035	33405605	571	+	LOC_Os02g54530	96	sp|Q40374|PR1_MEDTR Pathogenesis-related protein PR-1 OS=Medicago truncatula GN=PR-1 PE=2 SV=1//2.75839e-38
Chr2	33427582	33427777	196	Promoter (<=1kb)	33427245	33427781	537	-	LOC_Os02g54570	4	sp|Q05968|PR1_HORVU Pathogenesis-related protein 1 OS=Hordeum vulgare PE=2 SV=1//2.1413e-35
Chr2	33429940	33430248	309	Promoter (<=1kb)	33429949	33433753	3805	+	LOC_Os02g54580	0	sp|O14162|YE7A_SCHPO Putative lipase C4A8.10 OS=Schizosaccharomyces pombe (strain 972 / ATCC 24843) GN=SPAC4A8.10 PE=3 SV=2//9.8758e-14
Chr2	33443626	33443829	204	Promoter (<=1kb)	33442069	33443948	1880	-	LOC_Os02g54600	119	sp|Q8RXG3|M2K5_ARATH Mitogen-activated protein kinase kinase 5 OS=Arabidopsis thaliana GN=MKK5 PE=1 SV=2//6.29569e-127
Chr2	33456997	33457233	237	Promoter (<=1kb)	33456910	33461552	4643	+	LOC_Os02g54624	87	sp|Q93Z92|RING4_ARATH E3 ubiquitin-protein ligase At4g11680 OS=Arabidopsis thaliana GN=At4g11680 PE=2 SV=1//2.6901e-42
Chr2	33491712	33491909	198	Promoter (<=1kb)	33491615	33492869	1255	+	LOC_Os02g54690	97	sp|Q28CY2|EIF3G_XENTR Eukaryotic translation initiation factor 3 subunit G OS=Xenopus tropicalis GN=eif3g PE=2 SV=1//1.86021e-41
Chr2	33552362	33552557	196	Promoter (<=1kb)	33552171	33556522	4352	+	LOC_Os02g54790	191	sp|Q6ICX4|PTBP3_ARATH Polypyrimidine tract-binding protein homolog 3 OS=Arabidopsis thaliana GN=At1g43190 PE=2 SV=1//2.42236e-10
Chr2	33569548	33569789	242	Promoter (<=1kb)	33569263	33574120	4858	+	LOC_Os02g54820	285	sp|Q9ZV48|TPS11_ARATH Probable alpha,alpha-trehalose-phosphate synthase [UDP-forming] 11 OS=Arabidopsis thaliana GN=TPS11 PE=2 SV=1//0
Chr2	33594962	33595211	250	Promoter (<=1kb)	33595728	33599459	3732	+	LOC_Os02g54860	-517	sp|Q6KAE5|XB32_ORYSJ Probable E3 ubiquitin-protein ligase XBOS32 OS=Oryza sativa subsp. japonica GN=XBOS32 PE=2 SV=2//0
Chr2	33762472	33762728	257	Promoter (<=1kb)	33758966	33762633	3668	-	LOC_Os02g55120	0	sp|P72874|IF3_SYNY3 Translation initiation factor IF-3 OS=Synechocystis sp. (strain PCC 6803 / Kazusa) GN=infC PE=3 SV=1//7.84965e-23
Chr2	33782378	33782728	351	Promoter (<=1kb)	33779258	33782696	3439	-	LOC_Os02g55140	0	sp|Q6K669|AMPL2_ORYSJ Leucine aminopeptidase 2, chloroplastic OS=Oryza sativa subsp. japonica GN=Os02g0794700 PE=2 SV=1//0
Chr2	33783362	33783869	508	Promoter (<=1kb)	33779258	33782696	3439	-	LOC_Os02g55140	-666	sp|Q6K669|AMPL2_ORYSJ Leucine aminopeptidase 2, chloroplastic OS=Oryza sativa subsp. japonica GN=Os02g0794700 PE=2 SV=1//0
Chr2	33847965	33848160	196	Promoter (1-2kb)	33846613	33847781	1169	+	LOC_Os02g55280	1352	sp|Q00IB6|CPL4_ARATH RNA polymerase II C-terminal domain phosphatase-like 4 OS=Arabidopsis thaliana GN=CPL4 PE=1 SV=1//2.3355e-40
Chr2	33859160	33859355	196	Promoter (<=1kb)	33857140	33859405	2266	-	LOC_Os02g55310	50	sp|Q3E911|PP400_ARATH Pentatricopeptide repeat-containing protein At5g27460 OS=Arabidopsis thaliana GN=At5g27460 PE=2 SV=1//3.41337e-133
Chr2	33971277	33971472	196	Promoter (<=1kb)	33971370	33972686	1317	+	LOC_Os02g55470	0	sp|Q09326|MGAT2_RAT Alpha-1,6-mannosyl-glycoprotein 2-beta-N-acetylglucosaminyltransferase OS=Rattus norvegicus GN=Mgat2 PE=1 SV=1//2.9615e-54
Chr2	33996552	33996757	206	Promoter (<=1kb)	33990620	33996854	6235	-	LOC_Os02g55520	97	sp|Q90972|RNF13_CHICK E3 ubiquitin-protein ligase RNF13 OS=Gallus gallus GN=RNF13 PE=1 SV=1//6.1057e-12
Chr2	34071055	34071274	220	Promoter (<=1kb)	34071028	34075507	4480	+	LOC_Os02g55630	27	sp|Q99MB4|CBWD1_RAT COBW domain-containing protein 1 OS=Rattus norvegicus GN=Cbwd1 PE=2 SV=2//1.0913e-63
Chr2	34262823	34263066	244	Promoter (<=1kb)	34259963	34263088	3126	-	LOC_Os02g55980	22	sp|Q9AST6|VSP55_ARATH Vacuolar protein sorting-associated protein 55 homolog OS=Arabidopsis thaliana GN=At1g32410 PE=2 SV=1//1.75103e-48
Chr2	34274369	34274779	411	Promoter (<=1kb)	34274401	34276950	2550	+	LOC_Os02g56010	0	sp|Q66PF2|URT1_FRAAN Putative UDP-rhamnose:rhamnosyltransferase 1 OS=Fragaria ananassa GN=GT4 PE=2 SV=1//6.08964e-73
Chr2	34312985	34313204	220	Promoter (<=1kb)	34312706	34318668	5963	+	LOC_Os02g56060	279	sp|Q7LHG5|YI31B_YEAST Transposon Ty3-I Gag-Pol polyprotein OS=Saccharomyces cerevisiae (strain ATCC 204508 / S288c) GN=TY3B-I PE=3 SV=2//1.45853e-37
Chr2	34361354	34361624	271	Promoter (<=1kb)	34361204	34362409	1206	+	LOC_Os02g56160	150	sp|Q0WW40|FBK5_ARATH F-box/kelch-repeat protein At1g16250 OS=Arabidopsis thaliana GN=At1g16250 PE=2 SV=1//1.2582e-10
Chr2	34365137	34365391	255	Promoter (<=1kb)	34362301	34365534	3234	-	LOC_Os02g56170	143	sp|Q38945|DPNPH_ARATH PAP-specific phosphatase HAL2-like OS=Arabidopsis thaliana GN=AHL PE=2 SV=1//4.35413e-157
Chr2	34966365	34966560	196	Promoter (<=1kb)	34963624	34966602	2979	-	LOC_Os02g57100	42	sp|Q8RYE9|GPPL3_ARATH Haloacid dehalogenase-like hydrolase domain-containing protein At2g33255 OS=Arabidopsis thaliana GN=At2g33255 PE=2 SV=1//6.57949e-98
Chr2	34981153	34981409	257	Promoter (<=1kb)	34981044	34989879	8836	+	LOC_Os02g57120	109	sp|Q8RWY6|CLASP_ARATH CLIP-associated protein OS=Arabidopsis thaliana GN=CLASP PE=1 SV=1//1.8055e-106
Chr2	35242698	35243115	418	Promoter (<=1kb)	35242145	35243851	1707	+	LOC_Os02g57520	553	sp|Q8GWQ2|AHL20_ARATH AT-hook motif nuclear-localized protein 20 OS=Arabidopsis thaliana GN=AHL20 PE=2 SV=1//5.88785e-50
Chr2	35263679	35263874	196	Promoter (1-2kb)	35263166	35265393	2228	-	LOC_Os02g57560	1519	sp|Q8VZJ9|CRCK2_ARATH Calmodulin-binding receptor-like cytoplasmic kinase 2 OS=Arabidopsis thaliana GN=CRCK2 PE=2 SV=1//2.25318e-121
Chr2	35389785	35390005	221	Promoter (<=1kb)	35389604	35390587	984	-	LOC_Os02g57790	582	sp|Q681X4|ZAT5_ARATH Zinc finger protein ZAT5 OS=Arabidopsis thaliana GN=ZAT5 PE=2 SV=1//3.71126e-11
Chr2	35390218	35390462	245	Promoter (<=1kb)	35389604	35390587	984	-	LOC_Os02g57790	125	sp|Q681X4|ZAT5_ARATH Zinc finger protein ZAT5 OS=Arabidopsis thaliana GN=ZAT5 PE=2 SV=1//3.71126e-11
Chr3	813164	813393	230	Promoter (1-2kb)	812822	814725	1904	-	LOC_Os03g02330	1332	sp|Q9P6Q3|BCS1_SCHPO Probable mitochondrial chaperone bcs1 OS=Schizosaccharomyces pombe (strain 972 / ATCC 24843) GN=SPAC644.07 PE=2 SV=1//4.31665e-22
Chr3	848440	848635	196	Promoter (<=1kb)	847853	849147	1295	-	LOC_Os03g02390	512	sp|Q9LNQ1|TI231_ARATH Mitochondrial import inner membrane translocase subunit TIM23-1 OS=Arabidopsis thaliana GN=TIM23-1 PE=2 SV=1//3.28116e-50
Chr3	856803	857120	318	Promoter (<=1kb)	852259	857160	4902	-	LOC_Os03g02410	40	sp|Q9LNJ9|FKGP_ARATH Bifunctional fucokinase/fucose pyrophosphorylase OS=Arabidopsis thaliana GN=FKGP PE=1 SV=2//2.74391e-46
Chr3	1395100	1395341	242	Promoter (<=1kb)	1394429	1400139	5711	+	LOC_Os03g03260	671	sp|Q38897|BEL1_ARATH Homeobox protein BEL1 homolog OS=Arabidopsis thaliana GN=BEL1 PE=1 SV=2//8.17735e-71
Chr3	1551496	1551691	196	Promoter (<=1kb)	1551426	1553821	2396	+	LOC_Os03g03550	70	sp|Q6S4P4|RF2B_ORYSJ Transcription factor RF2b OS=Oryza sativa subsp. japonica GN=RF2b PE=1 SV=2//4.32231e-44
Chr3	1580481	1580676	196	Promoter (1-2kb)	1579316	1580910	1595	+	LOC_Os03g03600	1165	sp|O22126|FLA8_ARATH Fasciclin-like arabinogalactan protein 8 OS=Arabidopsis thaliana GN=FLA8 PE=1 SV=1//3.69148e-100
Chr3	1716472	1716803	332	Promoter (<=1kb)	1716437	1719782	3346	+	LOC_Os03g03820	35	sp|Q10S93|KAD1_ORYSJ Probable adenylate kinase 1, chloroplastic OS=Oryza sativa subsp. japonica GN=Os03g0130400 PE=2 SV=1//2.61603e-169
Chr3	1815521	1815765	245	Promoter (<=1kb)	1815439	1816490	1052	+	LOC_Os03g03980	82	sp|Q96CT7|CC124_HUMAN Coiled-coil domain-containing protein 124 OS=Homo sapiens GN=CCDC124 PE=1 SV=1//5.9431e-13
Chr3	1890572	1890799	228	Promoter (<=1kb)	1885975	1891309	5335	-	LOC_Os03g04130	510	sp|F4HUK6|AAE1_ARATH Probable acyl-activating enzyme 1, peroxisomal OS=Arabidopsis thaliana GN=AAE1 PE=2 SV=1//0
Chr3	1961096	1961331	236	Promoter (1-2kb)	1956859	1959799	2941	-	LOC_Os03g04270	-1297	sp|Q9SDA8|FBL10_ARATH F-box/LRR-repeat protein 10 OS=Arabidopsis thaliana GN=FBL10 PE=2 SV=1//0
Chr3	2015243	2015438	196	Promoter (<=1kb)	2014777	2016857	2081	+	LOC_Os03g04380	466	sp|O49619|PP350_ARATH Pentatricopeptide repeat-containing protein At4g35130, chloroplastic OS=Arabidopsis thaliana GN=PCMP-H27 PE=3 SV=1//3.91809e-99
Chr3	2388469	2388670	202	Promoter (<=1kb)	2387587	2390171	2585	+	LOC_Os03g04950	882	sp|O64495|SBT12_ARATH Subtilisin-like protease SBT1.2 OS=Arabidopsis thaliana GN=SBT1.2 PE=2 SV=1//0
Chr3	2506445	2506730	286	Promoter (<=1kb)	2506064	2507173	1110	+	LOC_Os03g05160	381	sp|Q9SV30|GATA8_ARATH GATA transcription factor 8 OS=Arabidopsis thaliana GN=GATA8 PE=2 SV=1//6.06832e-30
Chr3	2870421	2870698	278	Promoter (<=1kb)	2870362	2875430	5069	+	LOC_Os03g05760	59	sp|Q9FNY2|DPB_ARATH Transcription factor-like protein DPB OS=Arabidopsis thaliana GN=DPB PE=1 SV=1//1.24698e-32
Chr3	2887636	2887831	196	Promoter (<=1kb)	2883005	2887922	4918	-	LOC_Os03g05780	91	sp|Q0DV32|4CLL1_ORYSJ 4-coumarate--CoA ligase-like 1 OS=Oryza sativa subsp. japonica GN=4CLL1 PE=2 SV=2//0
Chr3	2913942	2914273	332	Promoter (<=1kb)	2913921	2922883	8963	+	LOC_Os03g05820	21	sp|Q0DV28|ARK1_ORYSJ Armadillo repeat-containing kinesin-like protein 1 OS=Oryza sativa subsp. japonica GN=Os03g0152900 PE=2 SV=2//0
Chr3	2985458	2985653	196	Promoter (<=1kb)	2986017	2989284	3268	+	LOC_Os03g05980	-364	sp|Q9FLF0|RS92_ARATH 40S ribosomal protein S9-2 OS=Arabidopsis thaliana GN=RPS9C PE=2 SV=1//5.22828e-86
Chr3	3059434	3059677	244	Promoter (<=1kb)	3053315	3058827	5513	-	LOC_Os03g06100	-607	sp|Q99315|YG31B_YEAST Transposon Ty3-G Gag-Pol polyprotein OS=Saccharomyces cerevisiae (strain ATCC 204508 / S288c) GN=TY3B-G PE=1 SV=3//1.19403e-64
Chr3	3170157	3170352	196	Promoter (<=1kb)	3170103	3176437	6335	+	LOC_Os03g06340	54	sp|Q2QWE9|SGS3_ORYSJ Protein SUPPRESSOR OF GENE SILENCING 3 homolog OS=Oryza sativa subsp. japonica GN=SGS3 PE=3 SV=1//3.26591e-13
Chr3	3184918	3185113	196	Promoter (<=1kb)	3184492	3185937	1446	-	LOC_Os03g06360	824	sp|P09444|LEA34_GOSHI Late embryogenesis abundant protein D-34 OS=Gossypium hirsutum PE=4 SV=1//1.97219e-09
Chr3	3402738	3402933	196	Promoter (<=1kb)	3402621	3404272	1652	+	LOC_Os03g06700	117	sp|O48780|KCS11_ARATH 3-ketoacyl-CoA synthase 11 OS=Arabidopsis thaliana GN=KCS11 PE=2 SV=1//2.12535e-47
Chr3	3417369	3417564	196	Promoter (<=1kb)	3417324	3424868	7545	+	LOC_Os03g06720	45	sp|Q940Y9|POLL2_ARATH Putative ion channel POLLUX-like 2 OS=Arabidopsis thaliana GN=At5g43745 PE=2 SV=1//0
Chr3	3479402	3479597	196	Promoter (<=1kb)	3479411	3482220	2810	+	LOC_Os03g06880	0	sp|Q63B75|IOLC1_BACCZ 5-dehydro-2-deoxygluconokinase 1 OS=Bacillus cereus (strain ZK / E33L) GN=iolC1 PE=3 SV=1//6.02402e-12
Chr3	3599838	3600046	209	Promoter (<=1kb)	3595226	3600120	4895	-	LOC_Os03g07050	74	sp|P20825|POL2_DROME Retrovirus-related Pol polyprotein from transposon 297 OS=Drosophila melanogaster GN=pol PE=3 SV=1//1.34568e-49
Chr3	3795184	3795379	196	Promoter (<=1kb)	3794582	3795550	969	+	LOC_Os03g07470	602	sp|Q9FLE8|Y5986_ARATH Uncharacterized protein At5g39865 OS=Arabidopsis thaliana GN=At5g39865 PE=2 SV=1//2.16512e-36
Chr3	3969557	3969849	293	Promoter (<=1kb)	3970216	3974532	4317	+	LOC_Os03g07800	-367	sp|Q8VXZ9|R47BP_ARATH Polyadenylate-binding protein RBP47B&apos; OS=Arabidopsis thaliana GN=RBP47B&apos; PE=2 SV=1//4.96494e-178
Chr3	4023357	4023859	503	Promoter (<=1kb)	4024336	4028528	4193	+	LOC_Os03g07910	-477	sp|Q8RUF8|NILP3_ARATH Omega-amidase,chloroplastic OS=Arabidopsis thaliana GN=NLP3 PE=1 SV=1//1.16355e-163
Chr3	4090039	4090330	292	Promoter (<=1kb)	4090003	4094134	4132	+	LOC_Os03g08000	36	sp|Q969V5|MUL1_HUMAN Mitochondrial ubiquitin ligase activator of NFKB 1 OS=Homo sapiens GN=MUL1 PE=1 SV=1//1.78552e-11
Chr3	4106047	4106561	515	Promoter (<=1kb)	4104905	4105804	900	-	LOC_Os03g08030	-243	sp|Q6Z829|WEE1_ORYSJ Wee1-like protein kinase OS=Oryza sativa subsp. japonica GN=WEE1 PE=3 SV=1//7.49568e-09
Chr3	4442046	4442241	196	Promoter (<=1kb)	4441956	4443834	1879	+	LOC_Os03g08624	90	sp|P73212|DFRA_SYNY3 Putative dihydroflavonol-4-reductase OS=Synechocystis sp. (strain PCC 6803 / Kazusa) GN=dfrA PE=3 SV=1//5.54426e-34
Chr3	4449431	4449632	202	Promoter (<=1kb)	4446710	4449163	2454	-	LOC_Os03g08640	-268	sp|Q10QS7|ORC2_ORYSJ Origin of replication complex subunit 2 OS=Oryza sativa subsp. japonica GN=ORC2 PE=2 SV=1//0
Chr3	4482926	4483532	607	Promoter (<=1kb)	4482882	4489522	6641	+	LOC_Os03g08700	44	sp|Q2TBM9|SRAC1_BOVIN Protein SERAC1 OS=Bos taurus GN=SERAC1 PE=2 SV=1//4.0717e-47
Chr3	4711703	4711990	288	Distal Intergenic	4701964	4705495	3532	-	LOC_Os03g09070	-6208	sp|Q9D2H9|DAAF1_MOUSE Dynein assembly factor 1, axonemal OS=Mus musculus GN=Dnaaf1 PE=2 SV=1//4.36051e-15
Chr3	4780909	4781244	336	Promoter (<=1kb)	4780241	4781570	1330	-	LOC_Os03g09170	326	sp|Q8H1E4|RAP24_ARATH Ethylene-responsive transcription factor RAP2-4 OS=Arabidopsis thaliana GN=RAP2-4 PE=1 SV=1//4.40403e-38
Chr3	4824743	4825114	372	Promoter (2-3kb)	4821511	4822723	1213	-	LOC_Os03g09230	-2020	sp|Q8VYI9|NLTL5_ARATH Non-specific lipid-transfer protein-like protein At5g64080 OS=Arabidopsis thaliana GN=At5g64080 PE=1 SV=1//6.26688e-23
Chr3	4882638	4882967	330	Distal Intergenic	4886388	4887314	927	+	LOC_Os03g09820	-3421	sp|Q8W0W3|TF2B_ORYSJ Transcription initiation factor IIB OS=Oryza sativa subsp. japonica GN=TFIIB PE=1 SV=1//3.08723e-86
Chr3	5084784	5085047	264	Promoter (<=1kb)	5082306	5085039	2734	-	LOC_Os03g10070	0	sp|P29054|TF2B_XENLA Transcription initiation factor IIB OS=Xenopus laevis GN=gtf2b PE=2 SV=1//4.38386e-29
Chr3	5135295	5135507	213	Promoter (1-2kb)	5134268	5137506	3239	+	LOC_Os03g10140	1027	sp|Q9SCQ6|IDD2_ARATH Protein indeterminate-domain 2 OS=Arabidopsis thaliana GN=IDD2 PE=2 SV=1//4.94617e-89
Chr3	5458551	5459146	596	Promoter (<=1kb)	5458096	5462607	4512	+	LOC_Os03g10680	455	sp|Q10Q99|FH8_ORYSJ Formin-like protein 8 OS=Oryza sativa subsp. japonica GN=FH8 PE=2 SV=1//0
Chr3	5539399	5539594	196	Promoter (<=1kb)	5538810	5540321	1512	-	LOC_Os03g10810	727	sp|O64815|HLS1L_ARATH Probable N-acetyltransferase HLS1-like OS=Arabidopsis thaliana GN=At2g23060 PE=2 SV=1//9.67756e-90
Chr3	5551398	5551757	360	Promoter (<=1kb)	5547033	5551372	4340	-	LOC_Os03g10820	-26	sp|Q94AI1|QWRF2_ARATH QWRF motif-containing protein 2 OS=Arabidopsis thaliana GN=QWRF2 PE=2 SV=1//8.74101e-58
Chr3	5620457	5620652	196	Promoter (<=1kb)	5616047	5620727	4681	-	LOC_Os03g10940	75	sp|Q08466|CSK22_ARATH Casein kinase II subunit alpha-2 OS=Arabidopsis thaliana GN=CKA2 PE=2 SV=3//0
Chr3	5686975	5687302	328	Promoter (<=1kb)	5686615	5687605	991	+	LOC_Os03g11060	360	sp|Q9M7N6|MAF1_SOLLC MFP1 attachment factor 1 OS=Solanum lycopersicum GN=MAF1 PE=1 SV=1//5.82091e-13
Chr3	5721185	5721446	262	Promoter (<=1kb)	5721104	5728615	7512	+	LOC_Os03g11120	81	sp|Q9M2T9|SYMM_ARATH Methionine--tRNA ligase, chloroplastic/mitochondrial OS=Arabidopsis thaliana GN=OVA1 PE=2 SV=1//0
Chr3	5848960	5849155	196	Promoter (<=1kb)	5848899	5850488	1590	+	LOC_Os03g11350	61	sp|Q2V6J9|UFOG7_FRAAN UDP-glucose flavonoid 3-O-glucosyltransferase 7 OS=Fragaria ananassa GN=GT7 PE=1 SV=1//1.14453e-79
Chr3	5853026	5853567	542	Promoter (<=1kb)	5853906	5857464	3559	+	LOC_Os03g11360	-339	sp|B9F655|PIRL7_ORYSJ Plant intracellular Ras-group-related LRR protein 7 OS=Oryza sativa subsp. japonica GN=IRL7 PE=2 SV=1//3.88844e-28
Chr3	5870279	5870495	217	Promoter (<=1kb)	5870149	5874816	4668	+	LOC_Os03g11410	130	sp|Q42290|MPPB_ARATH Probable mitochondrial-processing peptidase subunit beta OS=Arabidopsis thaliana GN=At3g02090 PE=2 SV=2//0
Chr3	6206563	6206758	196	Promoter (<=1kb)	6206887	6211266	4380	+	LOC_Os03g11850	-129	sp|P10978|POLX_TOBAC Retrovirus-related Pol polyprotein from transposon TNT 1-94 OS=Nicotiana tabacum PE=2 SV=1//0
Chr3	6211954	6212184	231	Promoter (<=1kb)	6212378	6216631	4254	+	LOC_Os03g11860	-194	sp|E1BNG3|ASCC3_BOVIN Activating signal cointegrator 1 complex subunit 3 OS=Bos taurus GN=ascc3 PE=3 SV=1//6.13709e-07
Chr3	6522235	6522430	196	Promoter (<=1kb)	6519051	6523170	4120	-	LOC_Os03g12360	740	sp|Q94AH8|TPS6_ARATH Alpha,alpha-trehalose-phosphate synthase [UDP-forming] 6 OS=Arabidopsis thaliana GN=TPS6 PE=1 SV=2//0
Chr3	6831962	6832402	441	Promoter (<=1kb)	6826703	6832152	5450	-	LOC_Os03g12760	0	sp|Q9T072|BH025_ARATH Transcription factor bHLH25 OS=Arabidopsis thaliana GN=BHLH25 PE=2 SV=2//7.94144e-27
Chr3	6932005	6932200	196	Promoter (<=1kb)	6931709	6933328	1620	+	LOC_Os03g12860	296	sp|Q8GRL4|HOX19_ORYSJ Homeobox-leucine zipper protein HOX19 OS=Oryza sativa subsp. japonica GN=HOX19 PE=2 SV=1//1.19465e-85
Chr3	7353751	7353977	227	Promoter (<=1kb)	7353032	7354368	1337	-	LOC_Os03g13600	391	sp|Q42485|ZFP1_ARATH Zinc finger protein 1 OS=Arabidopsis thaliana GN=ZFP1 PE=2 SV=1//5.94346e-07
Chr3	7465807	7466002	196	Promoter (<=1kb)	7458678	7464852	6175	-	LOC_Os03g13780	-955	sp|Q9LNG5|PPP7L_ARATH Serine/threonine-protein phosphatase 7 long form homolog OS=Arabidopsis thaliana GN=At1g48120 PE=2 SV=1//2.14638e-34
Chr3	7526817	7527163	347	Promoter (<=1kb)	7527674	7529809	2136	+	LOC_Os03g13880	-511	sp|P08770|TRA1_MAIZE Putative AC transposase OS=Zea mays PE=2 SV=2//1.97631e-06
Chr3	7563921	7564147	227	Promoter (<=1kb)	7563863	7564511	649	+	LOC_Os03g13940	58	sp|C0LGI2|Y1677_ARATH Probable LRR receptor-like serine/threonine-protein kinase At1g67720 OS=Arabidopsis thaliana GN=At1g67720 PE=2 SV=1//2.37296e-11
Chr3	7613173	7613572	400	Promoter (<=1kb)	7610990	7614083	3094	-	LOC_Os03g14030	511	sp|P50694|TLP_PRUAV Glucan endo-1,3-beta-glucosidase OS=Prunus avium PE=1 SV=1//2.03856e-67
Chr3	7664088	7664283	196	Promoter (<=1kb)	7664194	7664571	378	+	LOC_Os03g14100	0	sp|Q38851|MYB6_ARATH Transcription repressor MYB6 OS=Arabidopsis thaliana GN=MYB6 PE=1 SV=1//2.51119e-24
Chr3	7664767	7665020	254	Promoter (<=1kb)	7664194	7664571	378	+	LOC_Os03g14100	573	sp|Q38851|MYB6_ARATH Transcription repressor MYB6 OS=Arabidopsis thaliana GN=MYB6 PE=1 SV=1//2.51119e-24
Chr3	7699808	7700223	416	Promoter (<=1kb)	7698877	7699470	594	-	LOC_Os03g14190	-338	sp|Q76LC6|RBM24_DANRE RNA-binding protein 24 OS=Danio rerio GN=rbm24 PE=2 SV=1//3.53956e-34
Chr3	7833183	7833378	196	Promoter (<=1kb)	7831876	7833791	1916	-	LOC_Os03g14400	413	sp|Q8VWZ7|C76B6_CATRO Geraniol 8-hydroxylase OS=Catharanthus roseus GN=CYP76B6 PE=1 SV=1//6.11398e-156
Chr3	8102633	8102862	230	Promoter (<=1kb)	8101572	8102858	1287	-	LOC_Os03g14860	0	sp|Q9C801|MOS2_ARATH Protein MOS2 OS=Arabidopsis thaliana GN=MOS2 PE=2 SV=1//6.59465e-22
Chr3	8103425	8103620	196	Promoter (<=1kb)	8101572	8102858	1287	-	LOC_Os03g14860	-567	sp|Q9C801|MOS2_ARATH Protein MOS2 OS=Arabidopsis thaliana GN=MOS2 PE=2 SV=1//6.59465e-22
Chr3	8153119	8153459	341	Promoter (<=1kb)	8152544	8154731	2188	+	LOC_Os03g14950	575	sp|O80959|PLP6_ARATH Patatin-like protein 6 OS=Arabidopsis thaliana GN=PLP6 PE=2 SV=1//4.67378e-126
Chr3	8449714	8449996	283	Distal Intergenic	8437361	8441970	4610	-	LOC_Os03g15430	-7744	sp|Q0WVZ1|Y3330_ARATH Putative metallophosphoesterase At3g03305 OS=Arabidopsis thaliana GN=At3g03305 PE=2 SV=1//1.21394e-115
Chr3	9188053	9188396	344	Promoter (<=1kb)	9186433	9187411	979	-	LOC_Os03g16650	-642	sp|P10978|POLX_TOBAC Retrovirus-related Pol polyprotein from transposon TNT 1-94 OS=Nicotiana tabacum PE=2 SV=1//1.67072e-10
Chr3	9452634	9452829	196	Promoter (<=1kb)	9449305	9453103	3799	-	LOC_Os03g17010	274	sp|Q8L773|THO4A_ARATH THO complex subunit 4A OS=Arabidopsis thaliana GN=ALY1 PE=1 SV=1//6.70074e-43
Chr3	9480812	9481022	211	Promoter (<=1kb)	9480106	9489032	8927	+	LOC_Os03g17050	706	sp|F4IXE7|IDM1_ARATH Increased DNA methylation 1 OS=Arabidopsis thaliana GN=IDM1 PE=1 SV=1//4.95558e-09
Chr3	9599485	9599703	219	Promoter (<=1kb)	9599365	9601109	1745	+	LOC_Os03g17220	120	sp|Q9M3C8|DIR24_ARATH Dirigent protein 24 OS=Arabidopsis thaliana GN=DIR24 PE=2 SV=1//1.4683e-68
Chr3	9737052	9737348	297	Promoter (<=1kb)	9733146	9737565	4420	-	LOC_Os03g17520	217	sp|Q8H8U0|CLS_ORYSJ Cardiolipin synthase (CMP-forming), mitochondrial OS=Oryza sativa subsp. japonica GN=Os03g0283600 PE=2 SV=1//3.83098e-147
Chr3	9788450	9788645	196	Promoter (<=1kb)	9783786	9788821	5036	-	LOC_Os03g17590	176	sp|P36151|YK50_YEAST Uncharacterized protein YKR070W OS=Saccharomyces cerevisiae (strain ATCC 204508 / S288c) GN=YKR070W PE=1 SV=1//2.15542e-46
Chr3	9856245	9856529	285	Promoter (<=1kb)	9852712	9856043	3332	-	LOC_Os03g17710	-202	sp|Q9FYB7|RSZ32_ARATH Serine/arginine-rich splicing factor RS2Z32 OS=Arabidopsis thaliana GN=RS2Z32 PE=1 SV=1//8.26106e-74
Chr3	9946769	9946964	196	Promoter (<=1kb)	9946381	9952426	6046	+	LOC_Os03g17850	388	sp|Q10N05|GT32_ORYSJ Probable glucuronosyltransferase Os03g0287800 OS=Oryza sativa subsp. japonica GN=Os03g0287800 PE=3 SV=1//0
Chr3	10028097	10028407	311	Promoter (<=1kb)	10028105	10029116	1012	+	LOC_Os03g18020	0	sp|Q9SR92|STR10_ARATH Rhodanese-like domain-containing protein 10 OS=Arabidopsis thaliana GN=STR10 PE=2 SV=1//1.02587e-53
Chr3	10083164	10083441	278	Promoter (<=1kb)	10080248	10083451	3204	-	LOC_Os03g18070	10	sp|P48620|FAD3C_SESIN Omega-3 fatty acid desaturase, chloroplastic OS=Sesamum indicum GN=FAD7 PE=2 SV=1//0
Chr3	10163562	10163905	344	Promoter (<=1kb)	10163441	10165477	2037	+	LOC_Os03g18150	121	sp|Q10MX1|P2C32_ORYSJ Probable protein phosphatase 2C 32 OS=Oryza sativa subsp. japonica GN=Os03g0292100 PE=2 SV=1//0
Chr3	10184943	10185204	262	Promoter (<=1kb)	10184582	10187474	2893	+	LOC_Os03g18170	361	sp|Q9FZ36|M3K2_ARATH Mitogen-activated protein kinase kinase kinase 2 OS=Arabidopsis thaliana GN=ANP2 PE=2 SV=1//1.29336e-38
Chr3	10220373	10220568	196	Promoter (<=1kb)	10217796	10220748	2953	-	LOC_Os03g18220	180	sp|Q10MW3|PDC2_ORYSJ Pyruvate decarboxylase 2 OS=Oryza sativa subsp. japonica GN=PDC2 PE=2 SV=1//1.72886e-26
Chr3	10286559	10286754	196	Promoter (<=1kb)	10286812	10291004	4193	+	LOC_Os03g18360	-58	sp|O65020|ETO1_ARATH Ethylene-overproduction protein 1 OS=Arabidopsis thaliana GN=ETO1 PE=1 SV=2//0
Chr3	10388280	10388498	219	Promoter (<=1kb)	10387991	10390923	2933	+	LOC_Os03g18550	289	sp|O14281|YETC_SCHPO Uncharacterized mitochondrial carrier C8C9.12c OS=Schizosaccharomyces pombe (strain 972 / ATCC 24843) GN=SPAC8C9.12c PE=3 SV=1//2.72183e-06
Chr3	10865042	10865243	202	Promoter (<=1kb)	10864693	10866273	1581	+	LOC_Os03g19330	349	sp|Q9LZJ3|XXT1_ARATH Xyloglucan 6-xylosyltransferase 1 OS=Arabidopsis thaliana GN=XXT1 PE=1 SV=1//6.95433e-152
Chr3	11047971	11048166	196	Promoter (<=1kb)	11048488	11050804	2317	+	LOC_Os03g19650	-322	sp|Q9SQU6|PP216_ARATH Pentatricopeptide repeat-containing protein At3g06430, chloroplastic OS=Arabidopsis thaliana GN=EMB2750 PE=2 SV=1//1.13945e-11
Chr3	11210824	11211019	196	Promoter (<=1kb)	11210766	11214946	4181	+	LOC_Os03g19930	58	sp|Q9I0K9|PUR8_PSEAE Adenylosuccinate lyase OS=Pseudomonas aeruginosa (strain ATCC 15692 / PAO1 / 1C / PRS 101 / LMG 12228) GN=purB PE=3 SV=1//4.71785e-12
Chr3	11355470	11355685	216	Promoter (<=1kb)	11351431	11355773	4343	-	LOC_Os03g20100	88	sp|P29344|RR1_SPIOL 30S ribosomal protein S1, chloroplastic OS=Spinacia oleracea GN=RPS1 PE=1 SV=1//0
Chr3	11372825	11373177	353	Promoter (<=1kb)	11373339	11376710	3372	+	LOC_Os03g20140	-162	sp|Q8BR93|HARB1_MOUSE Putative nuclease HARBI1 OS=Mus musculus GN=Harbi1 PE=2 SV=1//3.76296e-11
Chr3	11459417	11459627	211	Promoter (<=1kb)	11459888	11461047	1160	+	LOC_Os03g20270	-261	sp|Q766C3|NEP1_NEPGR Aspartic proteinase nepenthesin-1 OS=Nepenthes gracilis GN=nep1 PE=1 SV=1//1.62111e-55
Chr3	11534253	11534551	299	Promoter (2-3kb)	11526273	11531983	5711	-	LOC_Os03g20380	-2270	sp|Q6X4A2|CIPKV_ORYSJ CBL-interacting protein kinase 31 OS=Oryza sativa subsp. japonica GN=CIPK31 PE=1 SV=1//0
Chr3	11700329	11700569	241	Promoter (<=1kb)	11699262	11700672	1411	-	LOC_Os03g20680	103	sp|A3AHG5|LEA1_ORYSJ Late embryogenesis abundant protein 1 OS=Oryza sativa subsp. japonica GN=LEA1 PE=2 SV=1//3.75315e-140
Chr3	11709417	11709745	329	Promoter (<=1kb)	11703634	11709671	6038	-	LOC_Os03g20690	0	sp|P10978|POLX_TOBAC Retrovirus-related Pol polyprotein from transposon TNT 1-94 OS=Nicotiana tabacum PE=2 SV=1//1.77082e-149
Chr3	11721717	11722197	481	Promoter (<=1kb)	11720632	11721259	628	-	LOC_Os03g20710	-458	sp|A3BMZ5|BGL26_ORYSJ Beta-glucosidase 26 OS=Oryza sativa subsp. japonica GN=BGLU26 PE=1 SV=1//6.17738e-41
Chr3	11730972	11731369	398	Promoter (<=1kb)	11730942	11731439	498	-	LOC_Os03g20730	70	sp|A4XKA5|DNAJ_CALS8 Chaperone protein DnaJ OS=Caldicellulosiruptor saccharolyticus (strain ATCC 43494 / DSM 8903 / Tp8T 6331) GN=dnaJ PE=3 SV=1//3.42847e-14
Chr3	11751960	11752423	464	Promoter (<=1kb)	11751863	11753402	1540	+	LOC_Os03g20760	97	sp|Q9ZVC7|XYP11_ARATH Xylogen-like protein 11 OS=Arabidopsis thaliana GN=XYP11 PE=1 SV=2//3.46628e-14
Chr3	11921054	11921249	196	Promoter (<=1kb)	11920214	11921352	1139	-	LOC_Os03g21000	103	sp|Q10M18|TRL12_ORYSJ Thioredoxin-like 1-2, chloroplastic OS=Oryza sativa subsp. japonica GN=Os03g0326500 PE=2 SV=1//5.81621e-161
Chr3	12078071	12078266	196	Promoter (<=1kb)	12078247	12079193	947	+	LOC_Os03g21170	0	sp|P27450|CX32_ARATH Probable serine/threonine-protein kinase Cx32, chloroplastic OS=Arabidopsis thaliana GN=At4g35600 PE=1 SV=2//3.97722e-06
Chr3	12478047	12478277	231	Promoter (<=1kb)	12478017	12480135	2119	+	LOC_Os03g21830	30	sp|Q87JZ5|Y4103_VIBPA Macro domain-containing protein VPA0103 OS=Vibrio parahaemolyticus serotype O3:K6 (strain RIMD 2210633) GN=VPA0103 PE=3 SV=1//2.9975e-52
Chr3	12551891	12552134	244	Promoter (<=1kb)	12545980	12552198	6219	-	LOC_Os03g21950	64	sp|Q9FI53|FUM2_ARATH Fumarate hydratase 2, chloroplastic OS=Arabidopsis thaliana GN=FUM2 PE=2 SV=1//0
Chr3	12598705	12599076	372	Promoter (<=1kb)	12599467	12605800	6334	+	LOC_Os03g21990	-391	sp|Q42384|PRL1_ARATH Protein pleiotropic regulatory locus 1 OS=Arabidopsis thaliana GN=PRL1 PE=1 SV=1//0
Chr3	12669382	12669639	258	Promoter (<=1kb)	12669214	12669600	387	+	LOC_Os03g22110	168	sp|O22255|ATL64_ARATH RING-H2 finger protein ATL64 OS=Arabidopsis thaliana GN=ATL64 PE=2 SV=1//1.07619e-10
Chr3	12725046	12725328	283	Promoter (<=1kb)	12718957	12726255	7299	-	LOC_Os03g22190	927	sp|Q8K368|FANCI_MOUSE Fanconi anemia group I protein homolog OS=Mus musculus GN=Fanci PE=1 SV=2//1.72669e-17
Chr3	12739512	12739707	196	Promoter (<=1kb)	12739144	12740552	1409	-	LOC_Os03g22210	845	sp|Q56S59|PHYLL_TOBAC Phylloplanin OS=Nicotiana tabacum PE=1 SV=1//1.10431e-08
Chr3	12847206	12847430	225	Promoter (<=1kb)	12836145	12847614	11470	-	LOC_Os03g22420	184	sp|P28737|MSP1_YEAST Protein MSP1 OS=Saccharomyces cerevisiae (strain ATCC 204508 / S288c) GN=MSP1 PE=1 SV=2//1.06339e-59
Chr3	12873126	12873321	196	Promoter (<=1kb)	12871629	12873556	1928	-	LOC_Os03g22470	235	sp|P22242|DRPE_CRAPL Desiccation-related protein PCC13-62 OS=Craterostigma plantagineum PE=2 SV=1//1.91921e-81
Chr3	12945901	12946112	212	Promoter (<=1kb)	12945560	12952643	7084	+	LOC_Os03g22540	341	sp|Q9SSE9|JMJ25_ARATH Lysine-specific demethylase JMJ25 OS=Arabidopsis thaliana GN=JMJ25 PE=1 SV=1//1.39575e-20
Chr3	13156659	13157092	434	Promoter (<=1kb)	13155800	13157404	1605	-	LOC_Os03g22780	312	sp|Q10LH0|DCVR_ORYSJ Divinyl chlorophyllide a 8-vinyl-reductase, chloroplastic OS=Oryza sativa subsp. japonica GN=DVR PE=3 SV=1//0
Chr3	13163287	13163581	295	Promoter (1-2kb)	13161913	13164014	2102	+	LOC_Os03g22790	1374	sp|Q8VYW2|BAM9_ARATH Inactive beta-amylase 9 OS=Arabidopsis thaliana GN=BAM9 PE=2 SV=1//2.66051e-89
Chr3	13168227	13168522	296	Promoter (<=1kb)	13164567	13167540	2974	-	LOC_Os03g22800	-687	sp|Q10LG8|TLP6_ORYSJ Tubby-like F-box protein 6 OS=Oryza sativa subsp. japonica GN=TULP6 PE=2 SV=1//0
Chr3	13592882	13593136	255	Promoter (<=1kb)	13586742	13593092	6351	-	LOC_Os03g23950	0	sp|O81742|APBLC_ARATH Beta-adaptin-like protein C OS=Arabidopsis thaliana GN=BETAC-AD PE=1 SV=2//0
Chr3	13666998	13667193	196	Promoter (<=1kb)	13666905	13670145	3241	+	LOC_Os03g24070	93	sp|Q94915|REG2_DROME Rhythmically expressed gene 2 protein OS=Drosophila melanogaster GN=Reg-2 PE=2 SV=1//6.68664e-09
Chr3	13712684	13712879	196	Promoter (<=1kb)	13712274	13716758	4485	+	LOC_Os03g24160	410	sp|Q9SFB8|PI5K6_ARATH Phosphatidylinositol 4-phosphate 5-kinase 6 OS=Arabidopsis thaliana GN=PIP5K6 PE=2 SV=1//1.45111e-08
Chr3	14158835	14159071	237	Promoter (<=1kb)	14153872	14159202	5331	-	LOC_Os03g24860	131	sp|Q8LBI9|EDL16_ARATH Sugar transporter ERD6-like 16 OS=Arabidopsis thaliana GN=At5g18840 PE=2 SV=2//2.65689e-176
Chr3	14205296	14205516	221	Promoter (1-2kb)	14206981	14209164	2184	+	LOC_Os03g24930	-1465	sp|Q8GXZ3|Y5102_ARATH Serine/threonine-protein kinase At5g01020 OS=Arabidopsis thaliana GN=At5g01020 PE=1 SV=1//6.21896e-130
Chr3	14233576	14233818	243	Promoter (<=1kb)	14233207	14236862	3656	+	LOC_Os03g24950	369	sp|Q9FHK9|MD26B_ARATH Probable mediator of RNA polymerase II transcription subunit 26b OS=Arabidopsis thaliana GN=MED26B PE=2 SV=1//1.20675e-12
Chr3	14316663	14316974	312	Promoter (<=1kb)	14316087	14323469	7383	+	LOC_Os03g25070	576	sp|Q10KY3|CAMK1_ORYSJ Calcium/calmodulin-dependent serine/threonine-protein kinase 1 OS=Oryza sativa subsp. japonica GN=CAMK1 PE=1 SV=1//0
Chr3	14538588	14538867	280	Promoter (<=1kb)	14538130	14539609	1480	-	LOC_Os03g25430	742	sp|Q9SB42|MDA1_ARATH Mediator-associated protein 1 OS=Arabidopsis thaliana GN=At4g25210 PE=1 SV=1//5.53892e-12
Chr3	14538959	14539383	425	Promoter (<=1kb)	14538130	14539609	1480	-	LOC_Os03g25430	226	sp|Q9SB42|MDA1_ARATH Mediator-associated protein 1 OS=Arabidopsis thaliana GN=At4g25210 PE=1 SV=1//5.53892e-12
Chr3	14552450	14552832	383	Promoter (<=1kb)	14552198	14552749	552	+	LOC_Os03g25470	252	sp|Q10KT6|COPT4_ORYSJ Copper transporter 4 OS=Oryza sativa subsp. japonica GN=COPT4 PE=3 SV=1//1.54866e-30
Chr3	14838879	14839142	264	Promoter (<=1kb)	14836333	14839122	2790	-	LOC_Os03g25920	0	sp|Q9LHN7|PHSC_ARATH Probable polyamine transporter At3g13620 OS=Arabidopsis thaliana GN=At3g13620 PE=2 SV=1//8.73342e-153
Chr3	14898600	14899064	465	Promoter (<=1kb)	14899827	14906973	7147	+	LOC_Os03g26000	-763	sp|Q55GJ3|NCA2_DICDI Nuclear control of ATPase protein 2 OS=Dictyostelium discoideum GN=nca2 PE=3 SV=1//3.53601e-08
Chr3	14929846	14930116	271	Promoter (<=1kb)	14925198	14930396	5199	-	LOC_Os03g26044	280	sp|Q7PC73|CSLA5_ORYSJ Probable mannan synthase 5 OS=Oryza sativa subsp. japonica GN=CSLA5 PE=2 SV=1//0
Chr3	15287929	15288278	350	Promoter (<=1kb)	15278369	15288088	9720	-	LOC_Os03g26760	0	sp|P0CT40|TF29_SCHPO Transposon Tf2-9 polyprotein OS=Schizosaccharomyces pombe (strain 972 / ATCC 24843) GN=Tf2-9 PE=3 SV=1//7.44504e-144
Chr3	15512768	15513193	426	Promoter (<=1kb)	15512510	15514115	1606	-	LOC_Os03g27090	922	sp|Q9SZP1|MYB4_ARATH Transcription repressor MYB4 OS=Arabidopsis thaliana GN=MYB4 PE=1 SV=1//8.61131e-54
Chr3	15564662	15564872	211	Promoter (<=1kb)	15563469	15564927	1459	-	LOC_Os03g27170	55	sp|Q7XJE6|MCA1_ARATH Metacaspase-1 OS=Arabidopsis thaliana GN=AMC1 PE=1 SV=1//1.0986e-103
Chr3	15668480	15668741	262	Promoter (<=1kb)	15668225	15669478	1254	+	LOC_Os03g27360	255	sp|Q84W40|ATL11_ARATH RING-H2 finger protein ATL11 OS=Arabidopsis thaliana GN=ATL11 PE=2 SV=2//9.88774e-24
Chr3	16050354	16050560	207	Promoter (<=1kb)	16051260	16058325	7066	+	LOC_Os03g27950	-700	sp|Q9UUH0|YKIC_SCHPO Uncharacterized protein C630.12 OS=Schizosaccharomyces pombe (strain 972 / ATCC 24843) GN=SPAC630.12 PE=3 SV=1//1.96342e-34
Chr3	16136274	16136546	273	Promoter (<=1kb)	16135837	16137124	1288	+	LOC_Os03g28080	437	sp|Q9XF63|ATL3_ARATH RING-H2 finger protein ATL3 OS=Arabidopsis thaliana GN=ATL3 PE=2 SV=1//3.98658e-15
Chr3	16308378	16308683	306	Promoter (<=1kb)	16301277	16307632	6356	-	LOC_Os03g28330	-746	sp|P31924|SUS1_ORYSJ Sucrose synthase 1 OS=Oryza sativa subsp. japonica GN=SUS1 PE=1 SV=1//0
Chr3	16378486	16378795	310	Promoter (<=1kb)	16372118	16379063	6946	-	LOC_Os03g28420	268	sp|Q9C9P4|KASC2_ARATH 3-oxoacyl-[acyl-carrier-protein] synthase II, chloroplastic OS=Arabidopsis thaliana GN=KAS2 PE=1 SV=1//0
Chr3	16388635	16389100	466	Promoter (2-3kb)	16383886	16386431	2546	-	LOC_Os03g28410	-2204	sp|O80377|RSSA_DAUCA 40S ribosomal protein SA OS=Daucus carota GN=179B PE=2 SV=1//2.64317e-81
Chr3	16874084	16874279	196	Promoter (<=1kb)	16873740	16876978	3239	+	LOC_Os03g29600	344	sp|B0BN95|HARB1_RAT Putative nuclease HARBI1 OS=Rattus norvegicus GN=Harbi1 PE=2 SV=1//8.46904e-15
Chr3	17216673	17216949	277	Promoter (<=1kb)	17216648	17217541	894	-	LOC_Os03g30160	592	sp|Q6NPN5|FK113_ARATH F-box/kelch-repeat protein At5g26960 OS=Arabidopsis thaliana GN=At5g26960 PE=2 SV=1//1.07916e-31
Chr3	17249109	17249597	489	Promoter (<=1kb)	17248317	17249567	1251	+	LOC_Os03g30220	792	sp|Q9SP35|TI172_ARATH Mitochondrial import inner membrane translocase subunit TIM17-2 OS=Arabidopsis thaliana GN=TIM17-2 PE=1 SV=2//1.28887e-07
Chr3	17622001	17622242	242	Promoter (<=1kb)	17616231	17622343	6113	-	LOC_Os03g30934	101	sp|Q9D081|ALG14_MOUSE UDP-N-acetylglucosamine transferase subunit ALG14 homolog OS=Mus musculus GN=Alg14 PE=2 SV=1//1.26874e-30
Chr3	17688918	17689123	206	Promoter (<=1kb)	17680228	17688211	7984	-	LOC_Os03g31044	-707	sp|Q0DR28|PUB57_ORYSJ U-box domain-containing protein 57 OS=Oryza sativa subsp. japonica GN=PUB57 PE=2 SV=1//3.90144e-59
Chr3	17749204	17749588	385	Promoter (<=1kb)	17745378	17748561	3184	-	LOC_Os03g31170	-643	sp|Q8LAC4|URH2_ARATH Probable uridine nucleosidase 2 OS=Arabidopsis thaliana GN=URH2 PE=2 SV=1//4.32066e-27
Chr3	18202460	18202891	432	Distal Intergenic	18211372	18222645	11274	+	LOC_Os03g31839	-8481	sp|Q56X46|MSL2_ARATH Mechanosensitive ion channel protein 2, chloroplastic OS=Arabidopsis thaliana GN=MSL2 PE=2 SV=1//8.63756e-133
Chr3	18409742	18409992	251	Promoter (<=1kb)	18410063	18411482	1420	+	LOC_Os03g32180	-71	sp|Q05091|PGIP_PYRCO Polygalacturonase inhibitor OS=Pyrus communis GN=PGIP PE=1 SV=1//3.62293e-39
Chr3	18553110	18553415	306	Promoter (<=1kb)	18549428	18552441	3014	-	LOC_Os03g32440	-669	sp|Q6L4R7|P2C53_ORYSJ Probable protein phosphatase 2C 53 OS=Oryza sativa subsp. japonica GN=Os05g0592800 PE=2 SV=1//1.65307e-22
Chr3	19025564	19025915	352	Promoter (1-2kb)	19020994	19024092	3099	-	LOC_Os03g33250	-1472	sp|Q99315|YG31B_YEAST Transposon Ty3-G Gag-Pol polyprotein OS=Saccharomyces cerevisiae (strain ATCC 204508 / S288c) GN=TY3B-G PE=1 SV=3//1.87564e-44
Chr3	19278275	19278470	196	Promoter (1-2kb)	19276815	19278309	1495	+	LOC_Os03g33720	1460	sp|Q4R6I1|GIN1_MACFA Gypsy retrotransposon integrase-like protein 1 OS=Macaca fascicularis GN=GIN1 PE=2 SV=1//1.20948e-08
Chr3	19311850	19312045	196	Promoter (<=1kb)	19310025	19312115	2091	-	LOC_Os03g33780	70	sp|Q7LHG5|YI31B_YEAST Transposon Ty3-I Gag-Pol polyprotein OS=Saccharomyces cerevisiae (strain ATCC 204508 / S288c) GN=TY3B-I PE=3 SV=2//2.5524e-13
Chr3	19312152	19312411	260	Promoter (<=1kb)	19310025	19312115	2091	-	LOC_Os03g33780	-37	sp|Q7LHG5|YI31B_YEAST Transposon Ty3-I Gag-Pol polyprotein OS=Saccharomyces cerevisiae (strain ATCC 204508 / S288c) GN=TY3B-I PE=3 SV=2//2.5524e-13
Chr3	19418559	19418809	251	Promoter (1-2kb)	19412908	19417098	4191	-	LOC_Os03g34040	-1461	sp|P93014|RR5_ARATH 30S ribosomal protein S5, chloroplastic OS=Arabidopsis thaliana GN=rps5 PE=2 SV=1//1.65823e-55
Chr3	19664778	19665003	226	Promoter (<=1kb)	19656021	19665462	9442	-	LOC_Os03g35454	459	sp|P14381|YTX2_XENLA Transposon TX1 uncharacterized 149 kDa protein OS=Xenopus laevis PE=3 SV=1//1.5597e-11
Chr3	19902323	19902518	196	Promoter (<=1kb)	19901699	19902103	405	+	LOC_Os03g35880	624	sp|O22446|HDA19_ARATH Histone deacetylase 19 OS=Arabidopsis thaliana GN=HDA19 PE=1 SV=2//3.60486e-13
Chr3	20254658	20254853	196	Promoter (<=1kb)	20254327	20259663	5337	+	LOC_Os03g36550	331	sp|Q6AVI0|RSLE2_ORYSJ Zinc finger BED domain-containing protein RICESLEEPER 2 OS=Oryza sativa subsp. japonica GN=Os03g0733400 PE=2 SV=1//6.44655e-104
Chr3	20782334	20782529	196	Promoter (<=1kb)	20772675	20782658	9984	-	LOC_Os03g37470	129	sp|Q9LYT3|TT12_ARATH Protein TRANSPARENT TESTA 12 OS=Arabidopsis thaliana GN=TT12 PE=2 SV=1//2.36925e-96
Chr3	20833573	20833812	240	Promoter (<=1kb)	20826568	20833736	7169	-	LOC_Os03g37554	0	sp|P10978|POLX_TOBAC Retrovirus-related Pol polyprotein from transposon TNT 1-94 OS=Nicotiana tabacum PE=2 SV=1//1.96612e-52
Chr3	20879167	20879362	196	Downstream (2-3kb)	20868325	20875717	7393	-	LOC_Os03g37640	-3450	sp|Q9LYT3|TT12_ARATH Protein TRANSPARENT TESTA 12 OS=Arabidopsis thaliana GN=TT12 PE=2 SV=1//2.6469e-121
Chr3	21091499	21091744	246	Promoter (<=1kb)	21091937	21097009	5073	+	LOC_Os03g37984	-193	sp|Q9C6S5|PHSB_ARATH Probable polyamine transporter At1g31830 OS=Arabidopsis thaliana GN=At1g31830 PE=2 SV=1//0
Chr3	21516529	21516746	218	Promoter (<=1kb)	21500676	21515569	14894	-	LOC_Os03g38740	-960	sp|Q10HL3|DCL2A_ORYSJ Endoribonuclease Dicer homolog 2a OS=Oryza sativa subsp. japonica GN=DCL2A PE=2 SV=1//0
Chr3	22029127	22029322	196	Promoter (<=1kb)	22016151	22029740	13590	-	LOC_Os03g39640	418	sp|Q84R21|Y1559_ARATH DUF21 domain-containing protein At1g55930, chloroplastic OS=Arabidopsis thaliana GN=CBSDUFCH2 PE=2 SV=2//0
Chr3	22187437	22187975	539	Promoter (<=1kb)	22184199	22187943	3745	-	LOC_Os03g39910	0	sp|Q9S9P3|FDM1_ARATH Factor of DNA methylation 1 OS=Arabidopsis thaliana GN=FDM1 PE=1 SV=1//1.06204e-34
Chr3	22292288	22292486	199	Promoter (<=1kb)	22285683	22292562	6880	-	LOC_Os03g40110	76	sp|Q8R3N1|NOP14_MOUSE Nucleolar protein 14 OS=Mus musculus GN=Nop14 PE=1 SV=2//1.9972e-13
Chr3	22352266	22352538	273	Promoter (<=1kb)	22347660	22351524	3865	-	LOC_Os03g40194	-742	sp|Q7XA40|RGA3_SOLBU Putative disease resistance protein RGA3 OS=Solanum bulbocastanum GN=RGA3 PE=2 SV=2//5.84824e-98
Chr3	22568397	22568592	196	Promoter (<=1kb)	22567670	22568685	1016	-	LOC_Os03g40600	93	sp|O65012|C78A4_PINRA Cytochrome P450 78A4 OS=Pinus radiata GN=CYP78A4 PE=2 SV=1//1.00492e-43
Chr3	22573404	22573731	328	Promoter (<=1kb)	22572706	22574008	1303	-	LOC_Os03g40610	277	sp|Q9LMX7|C78A5_ARATH Cytochrome P450 78A5 OS=Arabidopsis thaliana GN=CYP78A5 PE=2 SV=1//1.62958e-55
Chr3	22773748	22774151	404	Promoter (<=1kb)	22768487	22774452	5966	-	LOC_Os03g40970	301	sp|Q7LHG5|YI31B_YEAST Transposon Ty3-I Gag-Pol polyprotein OS=Saccharomyces cerevisiae (strain ATCC 204508 / S288c) GN=TY3B-I PE=3 SV=2//2.69076e-11
Chr3	22826374	22826617	244	Promoter (<=1kb)	22825897	22826541	645	-	LOC_Os03g41070	0	sp|Q2QN30|NRAM6_ORYSJ Metal transporter Nramp6 OS=Oryza sativa subsp. japonica GN=NRAMP6 PE=2 SV=1//2.93165e-74
Chr3	23054615	23054865	251	Promoter (<=1kb)	23054583	23068315	13733	+	LOC_Os03g41438	32	sp|Q10GX0|SPZXB_ORYSJ Serpin-ZXB OS=Oryza sativa subsp. japonica GN=Os03g0610800 PE=2 SV=1//0
Chr3	23073348	23073897	550	Promoter (1-2kb)	23072297	23074935	2639	-	LOC_Os03g41470	1038	sp|Q0DWH7|NMNAT_ORYSJ Nicotinamide/nicotinic acid mononucleotide adenylyltransferase OS=Oryza sativa subsp. japonica GN=Os02g0814900 PE=3 SV=2//3.64509e-38
Chr3	23322712	23323001	290	Promoter (<=1kb)	23322635	23328795	6161	+	LOC_Os03g41980	77	sp|Q7LHG5|YI31B_YEAST Transposon Ty3-I Gag-Pol polyprotein OS=Saccharomyces cerevisiae (strain ATCC 204508 / S288c) GN=TY3B-I PE=3 SV=2//1.32672e-40
Chr3	23808086	23808322	237	Promoter (<=1kb)	23797158	23808349	11192	-	LOC_Os03g42750	27	sp|Q9SX85|SEC3A_ARATH Exocyst complex component SEC3A OS=Arabidopsis thaliana GN=SEC3A PE=1 SV=1//0
Chr3	23832344	23832623	280	Exon (LOC_Os03g42780.1/LOC_Os03g42780, exon 6 of 6)	23836063	23839588	3526	+	LOC_Os03g42790	-3440	sp|Q949V6|ARI1_ARATH Probable E3 ubiquitin-protein ligase ARI1 OS=Arabidopsis thaliana GN=ARI1 PE=2 SV=1//4.12243e-106
Chr3	23900681	23900920	240	Promoter (<=1kb)	23900148	23900540	393	-	LOC_Os03g42860	-141	sp|Q9FI80|PP425_ARATH Pentatricopeptide repeat-containing protein At5g48910 OS=Arabidopsis thaliana GN=PCMP-H38 PE=2 SV=1//6.14893e-32
Chr3	24221819	24222014	196	Promoter (<=1kb)	24220021	24222271	2251	-	LOC_Os03g43430	257	sp|Q75GK3|TATA_ORYSJ Sec-independent protein translocase protein TATA, chloroplastic OS=Oryza sativa subsp. japonica GN=TATA PE=2 SV=1//5.64373e-56
Chr3	24250827	24251178	352	Promoter (1-2kb)	24250816	24252399	1584	-	LOC_Os03g43470	1221	sp|Q9SJG6|PP200_ARATH Pentatricopeptide repeat-containing protein At2g42920, chloroplastic OS=Arabidopsis thaliana GN=PCMP-E75 PE=2 SV=1//3.48389e-102
Chr3	24251732	24252129	398	Promoter (<=1kb)	24250816	24252399	1584	-	LOC_Os03g43470	270	sp|Q9SJG6|PP200_ARATH Pentatricopeptide repeat-containing protein At2g42920, chloroplastic OS=Arabidopsis thaliana GN=PCMP-E75 PE=2 SV=1//3.48389e-102
Chr3	24348665	24348905	241	Promoter (1-2kb)	24347498	24349006	1509	+	LOC_Os03g43580	1167	sp|Q8L4D8|IQD31_ARATH Protein IQ-DOMAIN 31 OS=Arabidopsis thaliana GN=IQD31 PE=1 SV=1//4.26454e-09
Chr3	24376162	24376410	249	Promoter (<=1kb)	24371063	24376085	5023	-	LOC_Os03g43610	-77	sp|P10978|POLX_TOBAC Retrovirus-related Pol polyprotein from transposon TNT 1-94 OS=Nicotiana tabacum PE=2 SV=1//0
Chr3	24545660	24546050	391	Promoter (<=1kb)	24545115	24547175	2061	+	LOC_Os03g43810	545	sp|O80536|PIF3_ARATH Transcription factor PIF3 OS=Arabidopsis thaliana GN=PIF3 PE=1 SV=1//3.86312e-31
Chr3	24590623	24590818	196	Promoter (<=1kb)	24591390	24596469	5080	+	LOC_Os03g43850	-572	sp|Q39199|RECAC_ARATH DNA repair protein recA homolog 1, chloroplastic OS=Arabidopsis thaliana GN=RECA PE=2 SV=1//0
Chr3	24617504	24617729	226	Promoter (<=1kb)	24616322	24617923	1602	-	LOC_Os03g43880	194	sp|Q8H5D4|PLP3_ORYSJ Patatin-like protein 3 OS=Oryza sativa subsp. japonica GN=PLP3 PE=3 SV=1//3.30109e-45
Chr3	24740335	24740537	203	Distal Intergenic	24744072	24745734	1663	+	LOC_Os03g44020	-3535	sp|Q2QM77|PID_ORYSJ Protein kinase PINOID OS=Oryza sativa subsp. japonica GN=PID PE=2 SV=1//2.33458e-126
Chr3	24863151	24863353	203	Promoter (<=1kb)	24858422	24862782	4361	-	LOC_Os03g44240	-369	sp|P10978|POLX_TOBAC Retrovirus-related Pol polyprotein from transposon TNT 1-94 OS=Nicotiana tabacum PE=2 SV=1//3.93078e-46
Chr3	24910658	24910853	196	Promoter (<=1kb)	24905585	24911076	5492	-	LOC_Os03g44310	223	sp|P41111|EI2BD_RABIT Translation initiation factor eIF-2B subunit delta OS=Oryctolagus cuniculus GN=EIF2B4 PE=2 SV=2//6.43531e-108
Chr3	25066680	25066875	196	Promoter (<=1kb)	25062638	25066824	4187	-	LOC_Os03g44530	0	sp|Q9SJF1|LSG12_ARATH GTPase LSG1-2 OS=Arabidopsis thaliana GN=LSG1-2 PE=1 SV=1//0
Chr3	25139670	25139929	260	Promoter (<=1kb)	25139520	25140594	1075	-	LOC_Os03g44650	665	sp|Q9FLE8|Y5986_ARATH Uncharacterized protein At5g39865 OS=Arabidopsis thaliana GN=At5g39865 PE=2 SV=1//1.73084e-24
Chr3	25194731	25194926	196	Promoter (2-3kb)	25197057	25206961	9905	+	LOC_Os03g44710	-2131	sp|Q10FZ7|YAB2_ORYSJ Protein YABBY 2 OS=Oryza sativa subsp. japonica GN=YAB2 PE=2 SV=1//8.63757e-121
Chr3	25221153	25221353	201	Promoter (<=1kb)	25219692	25221526	1835	-	LOC_Os03g44740	173	sp|Q9SD85|F3PH_ARATH Flavonoid 3&apos;-monooxygenase OS=Arabidopsis thaliana GN=CYP75B1 PE=1 SV=1//7.7755e-96
Chr3	25264322	25264517	196	Promoter (<=1kb)	25264262	25267958	3697	+	LOC_Os03g44800	60	sp|Q9FG14|MYOB7_ARATH Myosin-binding protein 7 OS=Arabidopsis thaliana GN=MYOB7 PE=1 SV=1//2.73211e-17
Chr3	25600120	25600435	316	Promoter (<=1kb)	25599553	25600862	1310	-	LOC_Os03g45340	427	sp|Q9M670|RTM2_ARATH Protein RESTRICTED TEV MOVEMENT 2 OS=Arabidopsis thaliana GN=RTM2 PE=2 SV=1//1.45648e-12
Chr3	26033306	26033515	210	Promoter (<=1kb)	26032940	26033802	863	-	LOC_Os03g46060	287	sp|P25096|P21_SOYBN Protein P21 OS=Glycine max PE=1 SV=1//9.6711e-61
Chr3	26128084	26128599	516	Promoter (<=1kb)	26128225	26134002	5778	+	LOC_Os03g46220	0	sp|Q7LHG5|YI31B_YEAST Transposon Ty3-I Gag-Pol polyprotein OS=Saccharomyces cerevisiae (strain ATCC 204508 / S288c) GN=TY3B-I PE=3 SV=2//6.63366e-10
Chr3	26363887	26364184	298	Promoter (<=1kb)	26363070	26364417	1348	+	LOC_Os03g46570	817	sp|Q9FHE4|BRG1_ARATH BOI-related E3 ubiquitin-protein ligase 1 OS=Arabidopsis thaliana GN=BRG1 PE=1 SV=1//5.04664e-26
Chr3	26460523	26460953	431	Promoter (<=1kb)	26460042	26461279	1238	+	LOC_Os03g46770	481	sp|P49310|GRP1_SINAL Glycine-rich RNA-binding protein GRP1A OS=Sinapis alba PE=2 SV=1//3.32323e-45
Chr3	26806986	26807181	196	Promoter (<=1kb)	26802061	26806344	4284	-	LOC_Os03g47410	-642	sp|P10978|POLX_TOBAC Retrovirus-related Pol polyprotein from transposon TNT 1-94 OS=Nicotiana tabacum PE=2 SV=1//0
Chr3	26817665	26817860	196	Promoter (<=1kb)	26817445	26822034	4590	+	LOC_Os03g47460	220	sp|P22244|RIP1_HORVU Protein synthesis inhibitor I OS=Hordeum vulgare GN=RIP30 PE=1 SV=2//3.05408e-08
Chr3	26878246	26878457	212	Promoter (<=1kb)	26878142	26879719	1578	+	LOC_Os03g47530	104	sp|Q9S7G2|GATL2_ARATH Probable galacturonosyltransferase-like 2 OS=Arabidopsis thaliana GN=GATL2 PE=2 SV=1//6.86904e-136
Chr3	27119428	27119674	247	Promoter (<=1kb)	27120029	27123813	3785	+	LOC_Os03g47780	-355	sp|Q54D08|LST8_DICDI Protein LST8 homolog OS=Dictyostelium discoideum GN=lst8 PE=1 SV=1//2.73265e-13
Chr3	27130191	27130507	317	Promoter (<=1kb)	27124422	27130550	6129	-	LOC_Os03g47790	43	sp|O04376|2A5B_ARATH Serine/threonine protein phosphatase 2A 57 kDa regulatory subunit B&apos; beta isoform OS=Arabidopsis thaliana GN=B&apos;BETA PE=1 SV=1//0
Chr3	27139189	27139384	196	Promoter (<=1kb)	27134165	27138727	4563	-	LOC_Os03g47800	-462	sp|Q8RWN5|RZ1C_ARATH Glycine-rich RNA-binding protein RZ1C OS=Arabidopsis thaliana GN=RZ1C PE=1 SV=1//3.32404e-29
Chr3	27139877	27140126	250	Promoter (<=1kb)	27139467	27140033	567	-	LOC_Os03g47804	0	sp|Q940H8|FRL4B_ARATH FRIGIDA-like protein 4b OS=Arabidopsis thaliana GN=FRL4B PE=1 SV=1//1.34949e-11
Chr3	27216618	27216820	203	Promoter (<=1kb)	27211629	27217230	5602	-	LOC_Os03g47870	410	sp|Q7LHG5|YI31B_YEAST Transposon Ty3-I Gag-Pol polyprotein OS=Saccharomyces cerevisiae (strain ATCC 204508 / S288c) GN=TY3B-I PE=3 SV=2//1.0596e-86
Chr3	27549811	27550101	291	Promoter (<=1kb)	27546111	27550077	3967	-	LOC_Os03g48380	0	sp|A2VD82|TTC38_XENLA Tetratricopeptide repeat protein 38 OS=Xenopus laevis GN=ttc38 PE=2 SV=1//2.12643e-23
Chr3	27703736	27703931	196	Promoter (<=1kb)	27703123	27704635	1513	-	LOC_Os03g48590	704	sp|Q54XK2|SC61A_DICDI Protein transport protein Sec61 subunit alpha OS=Dictyostelium discoideum GN=sec61a PE=3 SV=1//1.80962e-119
Chr3	27728435	27728643	209	Promoter (<=1kb)	27723754	27729054	5301	-	LOC_Os03g48626	411	sp|Q9M015|Y5161_ARATH Uncharacterized protein At5g01610 OS=Arabidopsis thaliana GN=At5g01610 PE=1 SV=1//4.59377e-07
Chr3	28035551	28035772	222	Promoter (<=1kb)	28035486	28038970	3485	+	LOC_Os03g49220	65	sp|Q851S8|PURA2_ORYSJ Adenylosuccinate synthetase 2, chloroplastic OS=Oryza sativa subsp. japonica GN=PURA2 PE=2 SV=1//6.30777e-17
Chr3	28330130	28330346	217	Promoter (<=1kb)	28329953	28339179	9227	+	LOC_Os03g49770	177	sp|Q8L751|ORP1C_ARATH Oxysterol-binding protein-related protein 1C OS=Arabidopsis thaliana GN=ORP1C PE=2 SV=1//0
Chr3	28671081	28671383	303	Promoter (<=1kb)	28671296	28679049	7754	+	LOC_Os03g50300	0	sp|Q9LS42|CASP_ARATH Protein CASP OS=Arabidopsis thaliana GN=CASP PE=1 SV=2//0
Chr3	28686742	28687371	630	Promoter (<=1kb)	28686958	28689716	2759	+	LOC_Os03g50310	0	sp|Q8RWD0|COL16_ARATH Zinc finger protein CONSTANS-LIKE 16 OS=Arabidopsis thaliana GN=COL16 PE=2 SV=2//8.16781e-20
Chr3	28798791	28799118	328	Promoter (<=1kb)	28795423	28799255	3833	-	LOC_Os03g50450	137	sp|Q9LP77|Y1848_ARATH Probable inactive receptor kinase At1g48480 OS=Arabidopsis thaliana GN=RKL1 PE=2 SV=1//1.23462e-48
Chr3	28830740	28831029	290	Promoter (<=1kb)	28830826	28836835	6010	+	LOC_Os03g50500	0	sp|Q8VZE4|PP299_ARATH Pentatricopeptide repeat-containing protein At4g01570 OS=Arabidopsis thaliana GN=At4g01570 PE=2 SV=1//1.66905e-06
Chr3	28839245	28839516	272	Promoter (<=1kb)	28839277	28844927	5651	+	LOC_Os03g50510	0	sp|Q9ZSS6|THD1_ARATH Threonine dehydratase biosynthetic, chloroplastic OS=Arabidopsis thaliana GN=OMR1 PE=1 SV=1//0
Chr3	28859813	28860073	261	Promoter (<=1kb)	28855620	28860136	4517	-	LOC_Os03g50540	63	sp|Q43644|NDUS1_SOLTU NADH dehydrogenase [ubiquinone] iron-sulfur protein 1, mitochondrial OS=Solanum tuberosum PE=2 SV=1//0
Chr3	28959542	28959746	205	Promoter (<=1kb)	28959071	28964466	5396	+	LOC_Os03g50730	471	sp|F4HVJ3|POD1_ARATH Protein POLLEN DEFECTIVE IN GUIDANCE 1 OS=Arabidopsis thaliana GN=POD1 PE=1 SV=1//4.3628e-166
Chr3	28991606	28991801	196	Promoter (<=1kb)	28988380	28991862	3483	-	LOC_Os03g50780	61	sp|Q7X6Y7|MMD1_ARATH PHD finger protein MALE MEIOCYTE DEATH 1 OS=Arabidopsis thaliana GN=MMD1 PE=2 SV=1//7.00865e-134
Chr3	29091112	29091307	196	Promoter (<=1kb)	29090611	29091429	819	+	LOC_Os03g50920	501	sp|Q10DV5|ZHD11_ORYSJ Zinc-finger homeodomain protein 11 OS=Oryza sativa subsp. japonica GN=ZHD11 PE=3 SV=1//1.12036e-82
Chr3	29153083	29153278	196	Promoter (<=1kb)	29150120	29153687	3568	-	LOC_Os03g51010	409	sp|Q99685|MGLL_HUMAN Monoglyceride lipase OS=Homo sapiens GN=MGLL PE=1 SV=2//4.10346e-29
Chr3	29296152	29296466	315	Promoter (<=1kb)	29296088	29302092	6005	+	LOC_Os03g51220	64	sp|Q8VY05|SWI3D_ARATH SWI/SNF complex subunit SWI3D OS=Arabidopsis thaliana GN=SWI3D PE=1 SV=3//1.06436e-11
Chr3	29430081	29430288	208	Promoter (<=1kb)	29426346	29430915	4570	-	LOC_Os03g51440	627	sp|C0LGK4|Y2165_ARATH Probable LRR receptor-like serine/threonine-protein kinase At2g16250 OS=Arabidopsis thaliana GN=At2g16250 PE=2 SV=1//2.40905e-26
Chr3	29550485	29550680	196	Promoter (<=1kb)	29543829	29550120	6292	-	LOC_Os03g51620	-365	sp|F4IBD7|CSCLA_ARATH CSC1-like protein RXW8 OS=Arabidopsis thaliana GN=RXW8 PE=2 SV=1//0
Chr3	29595896	29596155	260	Promoter (<=1kb)	29592966	29595799	2834	-	LOC_Os03g51680	-97	sp|Q9CR14|FANCL_MOUSE E3 ubiquitin-protein ligase FANCL OS=Mus musculus GN=Fancl PE=1 SV=1//7.66559e-44
Chr3	29631493	29631691	199	Promoter (1-2kb)	29626290	29632749	6460	-	LOC_Os03g51710	1058	sp|Q948L5|KNOS7_ORYSJ Homeobox protein knotted-1-like 7 OS=Oryza sativa subsp. japonica GN=OSH3 PE=2 SV=1//5.89167e-117
Chr3	29708129	29708324	196	Intron (LOC_Os03g51790.1/LOC_Os03g51790, intron 11 of 14)	29693047	29699178	6132	-	LOC_Os03g51780	-8951	sp|Q7LHG5|YI31B_YEAST Transposon Ty3-I Gag-Pol polyprotein OS=Saccharomyces cerevisiae (strain ATCC 204508 / S288c) GN=TY3B-I PE=3 SV=2//5.71945e-10
Chr3	29742143	29742338	196	Promoter (<=1kb)	29741646	29745291	3646	+	LOC_Os03g51870	497	sp|O23305|Y4449_ARATH FHA domain-containing protein At4g14490 OS=Arabidopsis thaliana GN=At4g14490 PE=1 SV=1//9.25012e-19
Chr3	29828808	29829108	301	Promoter (<=1kb)	29828701	29831679	2979	+	LOC_Os03g51984	107	sp|P37995|RSME_DICD3 Ribosomal RNA small subunit methyltransferase E OS=Dickeya dadantii (strain 3937) GN=rsmE PE=3 SV=2//2.47658e-17
Chr3	29846488	29846683	196	Promoter (<=1kb)	29844796	29847027	2232	-	LOC_Os03g52010	344	sp|Q9FZI8|LCAT1_ARATH Lecithin-cholesterol acyltransferase-like 1 OS=Arabidopsis thaliana GN=LCAT1 PE=2 SV=1//1.21768e-131
Chr3	29950202	29950484	283	Promoter (1-2kb)	29948932	29951110	2179	+	LOC_Os03g52160	1270	sp|Q3E6Y3|Y1869_ARATH Uncharacterized protein At1g28695 OS=Arabidopsis thaliana GN=At1g28695 PE=2 SV=1//1.00371e-65
Chr3	29960652	29960931	280	Promoter (<=1kb)	29960314	29966277	5964	+	LOC_Os03g52190	338	sp|Q7LHG5|YI31B_YEAST Transposon Ty3-I Gag-Pol polyprotein OS=Saccharomyces cerevisiae (strain ATCC 204508 / S288c) GN=TY3B-I PE=3 SV=2//3.18414e-09
Chr3	30036564	30036824	261	Promoter (<=1kb)	30034104	30036867	2764	-	LOC_Os03g52300	43	sp|Q41495|ST14_SOLTU STS14 protein OS=Solanum tuberosum GN=STS14 PE=2 SV=1//2.40483e-07
Chr3	30065955	30066159	205	Promoter (<=1kb)	30062334	30066155	3822	-	LOC_Os03g52340	0	sp|Q9C7S7|ERO1_ARATH Endoplasmic reticulum oxidoreductin-1 OS=Arabidopsis thaliana GN=AERO1 PE=1 SV=1//0
Chr3	30117233	30117465	233	Promoter (<=1kb)	30115650	30116657	1008	-	LOC_Os03g52475	-576	sp|Q9LJI9|PP260_ARATH Pentatricopeptide repeat-containing protein At3g28660 OS=Arabidopsis thaliana GN=PCMP-E80 PE=2 SV=1//3.36402e-91
Chr3	30122951	30123210	260	Promoter (<=1kb)	30119573	30123252	3680	-	LOC_Os03g52490	42	sp|Q2KIR4|RP25L_BOVIN Ribonuclease P protein subunit p25-like protein OS=Bos taurus GN=RPP25L PE=2 SV=1//2.64029e-16
Chr3	30197806	30198163	358	Promoter (<=1kb)	30197260	30199278	2019	+	LOC_Os03g52660	546	sp|Q9SE96|GEML1_ARATH GEM-like protein 1 OS=Arabidopsis thaliana GN=FIP1 PE=1 SV=1//4.35602e-16
Chr3	30229964	30230217	254	Promoter (<=1kb)	30228221	30230255	2035	-	LOC_Os03g52730	38	sp|Q86V88|MGDP1_HUMAN Magnesium-dependent phosphatase 1 OS=Homo sapiens GN=MDP1 PE=1 SV=1//1.10812e-27
Chr3	30402376	30402818	443	Promoter (<=1kb)	30401970	30402761	792	-	LOC_Os03g53010	0	sp|Q6Z1I5|STAD7_ORYSJ Acyl-[acyl-carrier-protein] desaturase 7, chloroplastic OS=Oryza sativa subsp. japonica GN=Os08g0200100 PE=2 SV=1//8.41099e-06
Chr3	30459811	30460163	353	Promoter (<=1kb)	30453759	30459072	5314	-	LOC_Os03g53110	-739	sp|B8AJT9|MRS2I_ORYSI Magnesium transporter MRS2-I OS=Oryza sativa subsp. indica GN=MRS2-I PE=3 SV=1//0
Chr3	30502442	30502708	267	Promoter (<=1kb)	30502405	30507088	4684	+	LOC_Os03g53170	37	sp|Q9SR01|PP212_ARATH Pentatricopeptide repeat-containing protein At3g04750, mitochondrial OS=Arabidopsis thaliana GN=PCMP-E81 PE=2 SV=1//0
Chr3	30563414	30563637	224	Promoter (<=1kb)	30560706	30563692	2987	-	LOC_Os03g53270	55	sp|P24805|TSJT1_TOBAC Stem-specific protein TSJT1 OS=Nicotiana tabacum GN=TSJT1 PE=2 SV=1//1.30034e-29
Chr3	30610085	30610280	196	Promoter (1-2kb)	30609984	30611450	1467	-	LOC_Os03g53350	1170	sp|Q9AT54|SCGT_TOBAC Scopoletin glucosyltransferase OS=Nicotiana tabacum GN=TOGT1 PE=1 SV=1//6.15306e-72
Chr3	30614325	30614829	505	Promoter (1-2kb)	30613949	30616157	2209	-	LOC_Os03g53360	1328	sp|Q9LIS1|CR26L_ARATH Protein ECERIFERUM 26-like OS=Arabidopsis thaliana GN=CER26L PE=2 SV=1//4.90615e-13
Chr3	30615695	30615909	215	Promoter (<=1kb)	30613949	30616157	2209	-	LOC_Os03g53360	248	sp|Q9LIS1|CR26L_ARATH Protein ECERIFERUM 26-like OS=Arabidopsis thaliana GN=CER26L PE=2 SV=1//4.90615e-13
Chr3	30797943	30798138	196	Promoter (<=1kb)	30796483	30798275	1793	-	LOC_Os03g53710	137	sp|Q9C503|NDF5_ARATH Protein NDH-DEPENDENT CYCLIC ELECTRON FLOW 5 OS=Arabidopsis thaliana GN=NDF5 PE=2 SV=1//5.89142e-61
Chr3	31023403	31023664	262	Promoter (<=1kb)	31023379	31025227	1849	+	LOC_Os03g54130	24	sp|A2XQE8|SAG39_ORYSI Senescence-specific cysteine protease SAG39 OS=Oryza sativa subsp. indica GN=OsI_14861 PE=3 SV=1//5.22678e-105
Chr3	31024416	31024639	224	Promoter (1-2kb)	31023379	31025227	1849	+	LOC_Os03g54130	1037	sp|A2XQE8|SAG39_ORYSI Senescence-specific cysteine protease SAG39 OS=Oryza sativa subsp. indica GN=OsI_14861 PE=3 SV=1//5.22678e-105
Chr3	31091593	31091881	289	Promoter (<=1kb)	31091207	31091683	477	-	LOC_Os03g54230	0	sp|Q9SZ30|HIS4_ARATH Imidazole glycerol phosphate synthase hisHF, chloroplastic OS=Arabidopsis thaliana GN=HISN4 PE=2 SV=1//1.78691e-43
Chr3	31093249	31094018	770	Promoter (<=1kb)	31094255	31097656	3402	+	LOC_Os03g54240	-237	sp|P48494|TPIS_ORYSJ Triosephosphate isomerase, cytosolic OS=Oryza sativa subsp. japonica GN=TPI PE=1 SV=3//1.57823e-08
Chr3	31292399	31292594	196	Promoter (<=1kb)	31292068	31293554	1487	-	LOC_Os03g55020	960	sp|Q9SGA8|U83A1_ARATH UDP-glycosyltransferase 83A1 OS=Arabidopsis thaliana GN=UGT83A1 PE=2 SV=1//1.04429e-103
Chr3	31338977	31339176	200	Promoter (<=1kb)	31332396	31339163	6768	-	LOC_Os03g55090	0	sp|P53535|PHSL2_SOLTU Alpha-1,4 glucan phosphorylase L-2 isozyme, chloroplastic/amyloplastic OS=Solanum tuberosum GN=STP-1 PE=1 SV=1//1.72144e-167
Chr3	31345272	31345468	197	Promoter (<=1kb)	31344934	31350836	5903	+	LOC_Os03g55100	338	sp|O65718|CNGC2_ARATH Cyclic nucleotide-gated ion channel 2 OS=Arabidopsis thaliana GN=CNGC2 PE=1 SV=1//0
Chr3	31391439	31391690	252	Promoter (<=1kb)	31391390	31399050	7661	+	LOC_Os03g55164	49	sp|Q9XI90|WRKY4_ARATH Probable WRKY transcription factor 4 OS=Arabidopsis thaliana GN=WRKY4 PE=1 SV=2//8.43958e-10
Chr3	31396373	31396661	289	Promoter (<=1kb)	31395468	31398928	3461	+	LOC_Os03g55164	905	sp|Q9XI90|WRKY4_ARATH Probable WRKY transcription factor 4 OS=Arabidopsis thaliana GN=WRKY4 PE=1 SV=2//8.43958e-10
Chr3	31471512	31471771	260	Promoter (<=1kb)	31469919	31471769	1851	-	LOC_Os03g55310	0	sp|Q08747|UAF30_YEAST Upstream activation factor subunit UAF30 OS=Saccharomyces cerevisiae (strain ATCC 204508 / S288c) GN=UAF30 PE=1 SV=1//8.33213e-14
Chr3	31566198	31566511	314	Promoter (<=1kb)	31566050	31570477	4428	+	LOC_Os03g55490	148	sp|O64816|CSK2P_ARATH Casein kinase II subunit alpha, chloroplastic OS=Arabidopsis thaliana GN=At2g23070 PE=2 SV=1//6.02118e-161
Chr3	31716133	31716328	196	Promoter (<=1kb)	31715956	31721892	5937	+	LOC_Os03g55704	177	sp|Q8LGM7|MOCOS_SOLLC Molybdenum cofactor sulfurase OS=Solanum lycopersicum GN=FLACCA PE=2 SV=1//6.72735e-16
Chr3	31875120	31875328	209	Promoter (<=1kb)	31874975	31876571	1597	+	LOC_Os03g56000	145	sp|Q9SY57|P2A10_ARATH Protein PHLOEM PROTEIN 2-LIKE A10 OS=Arabidopsis thaliana GN=PP2A10 PE=2 SV=1//2.08567e-74
Chr3	31934034	31934229	196	Promoter (<=1kb)	31930541	31934624	4084	-	LOC_Os03g56060	395	sp|Q6AU53|CSLC9_ORYSJ Probable xyloglucan glycosyltransferase 9 OS=Oryza sativa subsp. japonica GN=CSLC9 PE=2 SV=2//0
Chr3	32000405	32000645	241	Distal Intergenic	32008400	32010658	2259	+	LOC_Os03g56160	-7755	sp|O80939|LRK41_ARATH L-type lectin-domain containing receptor kinase IV.1 OS=Arabidopsis thaliana GN=LECRK41 PE=2 SV=1//0
Chr3	32008554	32008749	196	Promoter (<=1kb)	32008400	32010658	2259	+	LOC_Os03g56160	154	sp|O80939|LRK41_ARATH L-type lectin-domain containing receptor kinase IV.1 OS=Arabidopsis thaliana GN=LECRK41 PE=2 SV=1//0
Chr3	32243681	32243876	196	Promoter (1-2kb)	32242543	32243175	633	+	LOC_Os03g56600	1138	sp|Q9FIF7|PP435_ARATH Putative pentatricopeptide repeat-containing protein At5g59200, chloroplastic OS=Arabidopsis thaliana GN=PCMP-E41 PE=3 SV=1//1.67444e-06
Chr3	32291299	32291661	363	Promoter (<=1kb)	32291947	32292702	756	+	LOC_Os03g56690	-286	sp|P25250|CYSP2_HORVU Cysteine proteinase EP-B 2 OS=Hordeum vulgare GN=EPB2 PE=1 SV=1//5.67581e-10
Chr3	32417473	32417668	196	Promoter (2-3kb)	32411206	32415134	3929	-	LOC_Os03g56910	-2339	sp|P14381|YTX2_XENLA Transposon TX1 uncharacterized 149 kDa protein OS=Xenopus laevis PE=3 SV=1//1.96436e-43
Chr3	32443714	32443909	196	Promoter (<=1kb)	32440882	32443979	3098	-	LOC_Os03g56960	70	sp|Q9FMU2|PP380_ARATH Pentatricopeptide repeat-containing protein At5g14080 OS=Arabidopsis thaliana GN=At5g14080 PE=2 SV=2//5.71153e-06
Chr3	32554127	32554333	207	Promoter (<=1kb)	32550896	32554338	3443	-	LOC_Os03g57090	5	sp|Q54GD9|ARV1_DICDI Protein arv1 homolog OS=Dictyostelium discoideum GN=arv1 PE=3 SV=1//4.06674e-27
Chr3	32646229	32646557	329	Promoter (<=1kb)	32645456	32647051	1596	-	LOC_Os03g57240	494	sp|Q9FFX4|KNU_ARATH Zinc finger protein KNUCKLES OS=Arabidopsis thaliana GN=KNU PE=1 SV=1//1.57923e-07
Chr3	32732702	32733096	395	Promoter (<=1kb)	32732162	32733002	841	-	LOC_Os03g57400	0	sp|P25250|CYSP2_HORVU Cysteine proteinase EP-B 2 OS=Hordeum vulgare GN=EPB2 PE=1 SV=1//5.67897e-08
Chr3	32736367	32736679	313	Promoter (<=1kb)	32736206	32737399	1194	+	LOC_Os03g57410	161	sp|Q9FG21|ATL71_ARATH Putative RING-H2 finger protein ATL71 OS=Arabidopsis thaliana GN=ATL71 PE=3 SV=1//1.40046e-19
Chr3	32752517	32752712	196	Promoter (<=1kb)	32751649	32755670	4022	+	LOC_Os03g57450	868	sp|Q06850|CDPK1_ARATH Calcium-dependent protein kinase 1 OS=Arabidopsis thaliana GN=CPK1 PE=1 SV=1//0
Chr3	32810244	32810704	461	Promoter (<=1kb)	32810260	32810682	423	+	LOC_Os03g57540	0	sp|Q851R2|MEL1_ORYSJ Protein argonaute MEL1 OS=Oryza sativa subsp. japonica GN=MEL1 PE=2 SV=1//3.16175e-12
Chr3	32859140	32859335	196	Promoter (<=1kb)	32859411	32866545	7135	+	LOC_Os03g57660	-76	sp|Q9M1S8|GCP2_ARATH Probable glutamate carboxypeptidase 2 OS=Arabidopsis thaliana GN=AMP1 PE=1 SV=3//0
Chr3	32877845	32878150	306	Promoter (<=1kb)	32869482	32877206	7725	-	LOC_Os03g57680	-639	sp|Q852M2|ALDO3_ORYSJ Probable aldehyde oxidase 3 OS=Oryza sativa subsp. japonica GN=Os03g0790700 PE=3 SV=1//0
Chr3	33036578	33036835	258	Promoter (<=1kb)	33036315	33037134	820	+	LOC_Os03g58020	263	sp|P05332|YP20_BACLI Uncharacterized N-acetyltransferase p20 OS=Bacillus licheniformis GN=p20 PE=3 SV=1//4.58315e-12
Chr3	33096208	33096408	201	Promoter (<=1kb)	33096171	33099765	3595	+	LOC_Os03g58130	37	sp|Q9SQZ9|PITH1_ARATH PITH domain-containing protein At3g04780 OS=Arabidopsis thaliana GN=At3g04780 PE=1 SV=2//3.32683e-78
Chr3	33282343	33282538	196	Promoter (<=1kb)	33281871	33282563	693	-	LOC_Os03g58410	25	sp|Q9FRR1|PRA1E_ARATH PRA1 family protein E OS=Arabidopsis thaliana GN=PRA1E PE=1 SV=1//1.28419e-10
Chr3	33334373	33334694	322	Promoter (<=1kb)	33334430	33338512	4083	+	LOC_Os03g58540	0	sp|Q851Q6|OBGC2_ORYSJ Probable GTP-binding protein OBGC2 OS=Oryza sativa subsp. japonica GN=Os03g0799700 PE=2 SV=1//1.98822e-08
Chr3	33360094	33360289	196	Promoter (<=1kb)	33360063	33362393	2331	+	LOC_Os03g58580	31	sp|F4I9E1|NFD4_ARATH Protein NUCLEAR FUSION DEFECTIVE 4 OS=Arabidopsis thaliana GN=NFD4 PE=3 SV=1//5.1573e-09
Chr3	33459405	33459840	436	Promoter (<=1kb)	33459457	33460936	1480	+	LOC_Os03g58750	0	sp|P0C5E2|Y1839_ARATH Probable serine/threonine-protein kinase At1g18390 OS=Arabidopsis thaliana GN=At1g18390 PE=2 SV=2//3.69603e-72
Chr3	33550565	33550778	214	Promoter (<=1kb)	33546463	33551064	4602	-	LOC_Os03g58920	286	sp|Q9LV16|B3GTJ_ARATH Probable beta-1,3-galactosyltransferase 19 OS=Arabidopsis thaliana GN=B3GALT19 PE=2 SV=2//8.84198e-42
Chr3	33636467	33636662	196	Promoter (<=1kb)	33631923	33636847	4925	-	LOC_Os03g59080	185	sp|Q84P17|AEE18_ARATH Probable acyl-activating enzyme 18, peroxisomal OS=Arabidopsis thaliana GN=AAE18 PE=2 SV=1//0
Chr3	33638588	33638896	309	Promoter (<=1kb)	33638589	33639650	1062	+	LOC_Os03g59090	0	sp|Q8W496|PTC52_ARATH Protochlorophyllide-dependent translocon component 52, chloroplastic OS=Arabidopsis thaliana GN=PTC52 PE=2 SV=1//3.3111e-83
Chr3	33777641	33777836	196	Promoter (<=1kb)	33777510	33781305	3796	+	LOC_Os03g59330	131	sp|O23147|ADPG1_ARATH Polygalacturonase ADPG1 OS=Arabidopsis thaliana GN=ADPG1 PE=2 SV=1//3.64325e-107
Chr3	33789016	33789211	196	Promoter (1-2kb)	33787909	33789566	1658	+	LOC_Os03g59350	1107	sp|Q8H0F2|ANGT_GENTR Anthocyanin 3&apos;-O-beta-glucosyltransferase OS=Gentiana triflora PE=1 SV=1//4.82035e-54
Chr3	33945083	33945278	196	Promoter (<=1kb)	33941624	33946147	4524	-	LOC_Os03g59620	869	sp|Q9LZA6|SDP1_ARATH Triacylglycerol lipase SDP1 OS=Arabidopsis thaliana GN=SDP1 PE=1 SV=1//0
Chr3	33973826	33974080	255	Promoter (<=1kb)	33973665	33975577	1913	+	LOC_Os03g59670	161	sp|O80674|BH106_ARATH Transcription factor bHLH106 OS=Arabidopsis thaliana GN=BHLH106 PE=2 SV=1//1.05369e-16
Chr3	33994806	33995292	487	Promoter (<=1kb)	33994325	33995275	951	-	LOC_Os03g59690	0	sp|O22227|MIZ1_ARATH Protein MIZU-KUSSEI 1 OS=Arabidopsis thaliana GN=MIZ1 PE=1 SV=1//1.47389e-38
Chr3	34088980	34089175	196	Promoter (<=1kb)	34088936	34090111	1176	+	LOC_Os03g59880	44	sp|Q9FGR9|CEP1_ARATH KDEL-tailed cysteine endopeptidase CEP1 OS=Arabidopsis thaliana GN=CEP1 PE=2 SV=1//6.71404e-07
Chr3	34269240	34269536	297	Promoter (<=1kb)	34267483	34268718	1236	-	LOC_Os03g60250	-522	sp|B9F6Z0|CSPLH_ORYSJ CASP-like protein 4B3 OS=Oryza sativa subsp. japonica GN=Os03g0817100 PE=2 SV=1//5.31144e-76
Chr3	34327140	34327562	423	Promoter (<=1kb)	34327291	34332832	5542	+	LOC_Os03g60360	0	sp|Q93V84|FLXL1_ARATH Protein FLX-like 1 OS=Arabidopsis thaliana GN=FLXL1 PE=1 SV=1//1.27908e-29
Chr3	34410863	34411258	396	Promoter (<=1kb)	34410862	34411422	561	-	LOC_Os03g60540	164	sp|Q681X4|ZAT5_ARATH Zinc finger protein ZAT5 OS=Arabidopsis thaliana GN=ZAT5 PE=2 SV=1//9.60431e-22
Chr3	34455587	34455788	202	Promoter (<=1kb)	34455535	34456959	1425	+	LOC_Os03g60630	52	sp|Q9M2U1|DOF36_ARATH Dof zinc finger protein DOF3.6 OS=Arabidopsis thaliana GN=DOF3.6 PE=1 SV=2//2.93088e-37
Chr3	34539616	34539844	229	Promoter (<=1kb)	34539897	34541316	1420	+	LOC_Os03g60790	-53	sp|B0CAZ0|DNAJ_ACAM1 Chaperone protein DnaJ OS=Acaryochloris marina (strain MBIC 11017) GN=dnaJ PE=3 SV=1//2.7916e-14
Chr3	34720764	34721107	344	Promoter (<=1kb)	34715396	34721075	5680	-	LOC_Os03g61120	0	sp|Q94GF1|ASA1_ORYSJ Anthranilate synthase alpha subunit 1, chloroplastic OS=Oryza sativa subsp. japonica GN=ASA1 PE=1 SV=1//0
Chr3	34900679	34900951	273	Promoter (<=1kb)	34896332	34900930	4599	-	LOC_Os03g61540	0	sp|Q9Y4D2|DGLA_HUMAN Sn1-specific diacylglycerol lipase alpha OS=Homo sapiens GN=DAGLA PE=1 SV=3//7.44588e-10
Chr3	34959134	34959410	277	Promoter (<=1kb)	34957020	34959386	2367	-	LOC_Os03g61680	0	sp|Q9CR41|HYPK_MOUSE Huntingtin-interacting protein K OS=Mus musculus GN=Hypk PE=2 SV=2//6.82995e-12
Chr3	35085047	35085242	196	Promoter (<=1kb)	35084772	35090299	5528	+	LOC_Os03g61890	275	sp|O81283|TC159_ARATH Translocase of chloroplast 159, chloroplastic OS=Arabidopsis thaliana GN=TOC159 PE=1 SV=1//0
Chr3	35251614	35251809	196	Promoter (<=1kb)	35251282	35252606	1325	+	LOC_Os03g62230	332	sp|Q943I6|STOP1_ORYSJ Zinc finger protein STOP1 homolog OS=Oryza sativa subsp. japonica GN=Os01g0871200 PE=2 SV=1//4.90783e-88
Chr3	35397830	35398090	261	Promoter (<=1kb)	35392930	35398117	5188	-	LOC_Os03g62510	27	sp|Q2VEX9|CRTSO_DAUCA Prolycopene isomerase, chloroplastic OS=Daucus carota GN=CRTISO PE=2 SV=1//1.52179e-52
Chr3	35487488	35487831	344	Promoter (<=1kb)	35488304	35489956	1653	+	LOC_Os03g62710	-473	sp|P08770|TRA1_MAIZE Putative AC transposase OS=Zea mays PE=2 SV=2//1.03216e-30
Chr3	35511396	35511601	206	Promoter (<=1kb)	35511319	35518031	6713	+	LOC_Os03g62750	77	sp|Q9FYL3|ALB31_ARATH ALBINO3-like protein 1, chloroplastic OS=Arabidopsis thaliana GN=ALB3L1 PE=2 SV=3//2.37765e-24
Chr3	35666668	35666973	306	Promoter (<=1kb)	35659820	35666982	7163	-	LOC_Os03g63074	9	sp|Q9SFU3|PPA15_ARATH Purple acid phosphatase 15 OS=Arabidopsis thaliana GN=PAP15 PE=1 SV=1//0
Chr3	36201452	36201659	208	Promoter (2-3kb)	36203955	36205259	1305	+	LOC_Os03g64070	-2296	sp|Q84M85|LOGL5_ORYSJ Probable cytokinin riboside 5&apos;-monophosphate phosphoribohydrolase LOGL5 OS=Oryza sativa subsp. japonica GN=LOGL5 PE=2 SV=1//6.3896e-138
Chr3	36203041	36203236	196	Promoter (<=1kb)	36203955	36205259	1305	+	LOC_Os03g64070	-719	sp|Q84M85|LOGL5_ORYSJ Probable cytokinin riboside 5&apos;-monophosphate phosphoribohydrolase LOGL5 OS=Oryza sativa subsp. japonica GN=LOGL5 PE=2 SV=1//6.3896e-138
Chr3	36261537	36261799	263	Promoter (2-3kb)	36256015	36259499	3485	-	LOC_Os03g64170	-2038	sp|Q8LD23|GDL4_ARATH GDSL esterase/lipase At1g20120 OS=Arabidopsis thaliana GN=At1g20120 PE=2 SV=2//1.46239e-91
Chr3	36312563	36312893	331	Distal Intergenic	36318345	36319662	1318	+	LOC_Os03g64280	-5452	sp|Q84MB3|ACCH1_ARATH 1-aminocyclopropane-1-carboxylate oxidase homolog 1 OS=Arabidopsis thaliana GN=At1g06620 PE=2 SV=1//1.33642e-90
Chr3	36406047	36406318	272	Promoter (<=1kb)	36402736	36405403	2668	-	LOC_Os03g64415	-644	sp|F4JGP4|ATK5_ARATH Kinesin-5 OS=Arabidopsis thaliana GN=ATK5 PE=2 SV=1//0
Chr4	30160	30699	540	Promoter (<=1kb)	19440	30372	10933	-	LOC_Os04g01030	0	sp|Q9UR07|TF211_SCHPO Transposon Tf2-11 polyprotein OS=Schizosaccharomyces pombe (strain 972 / ATCC 24843) GN=Tf2-11 PE=3 SV=1//9.37097e-78
Chr4	581917	582424	508	Distal Intergenic	585941	587523	1583	+	LOC_Os04g01930	-3517	sp|Q3E7Q9|GLYT6_ARATH Probable glycosyltransferase At5g25310 OS=Arabidopsis thaliana GN=At5g25310 PE=3 SV=2//2.60832e-137
Chr4	649630	650040	411	Promoter (<=1kb)	646157	649682	3526	-	LOC_Os04g02050	0	sp|Q43870|APS2_ARATH ATP sulfurylase 2 OS=Arabidopsis thaliana GN=APS2 PE=1 SV=1//1.46972e-09
Chr4	745889	746262	374	Distal Intergenic	732329	736912	4584	-	LOC_Os04g02180	-8977	sp|Q7LHG5|YI31B_YEAST Transposon Ty3-I Gag-Pol polyprotein OS=Saccharomyces cerevisiae (strain ATCC 204508 / S288c) GN=TY3B-I PE=3 SV=2//2.20162e-32
Chr4	760159	760359	201	Promoter (<=1kb)	758906	759685	780	-	LOC_Os04g02210	-474	sp|P03360|POL_AVIRE Pol polyprotein (Fragment) OS=Avian reticuloendotheliosis virus GN=pol PE=3 SV=1//1.04221e-11
Chr4	784547	784742	196	Promoter (2-3kb)	778798	782359	3562	-	LOC_Os04g02250	-2188	sp|Q99315|YG31B_YEAST Transposon Ty3-G Gag-Pol polyprotein OS=Saccharomyces cerevisiae (strain ATCC 204508 / S288c) GN=TY3B-G PE=1 SV=3//1.67228e-09
Chr4	843396	844076	681	Promoter (<=1kb)	844723	854773	10051	+	LOC_Os04g02370	-647	sp|Q9LNG5|PPP7L_ARATH Serine/threonine-protein phosphatase 7 long form homolog OS=Arabidopsis thaliana GN=At1g48120 PE=2 SV=1//3.49328e-33
Chr4	1110769	1111097	329	Promoter (<=1kb)	1110873	1113296	2424	+	LOC_Os04g02850	0	sp|Q7Y211|PP285_ARATH Pentatricopeptide repeat-containing protein At3g57430, chloroplastic OS=Arabidopsis thaliana GN=PCMP-H81 PE=2 SV=2//1.77983e-18
Chr4	1128724	1128919	196	Promoter (<=1kb)	1128713	1134972	6260	+	LOC_Os04g02890	11	sp|Q8GXB1|U548_ARATH UPF0548 protein At2g17695 OS=Arabidopsis thaliana GN=At2g17695 PE=2 SV=1//7.17248e-72
Chr4	1183499	1183699	201	Promoter (<=1kb)	1184349	1197096	12748	+	LOC_Os04g02960	-650	sp|P10978|POLX_TOBAC Retrovirus-related Pol polyprotein from transposon TNT 1-94 OS=Nicotiana tabacum PE=2 SV=1//0
Chr4	1393228	1393423	196	Promoter (1-2kb)	1391922	1392935	1014	+	LOC_Os04g03270	1306	sp|P0CT40|TF29_SCHPO Transposon Tf2-9 polyprotein OS=Schizosaccharomyces pombe (strain 972 / ATCC 24843) GN=Tf2-9 PE=3 SV=1//6.94816e-33
Chr4	1858203	1858408	206	Promoter (<=1kb)	1857915	1865238	7324	+	LOC_Os04g04020	288	sp|Q9SFU0|SC24A_ARATH Protein transport protein Sec24-like At3g07100 OS=Arabidopsis thaliana GN=At3g07100 PE=2 SV=2//0
Chr4	2146419	2146617	199	Promoter (<=1kb)	2139354	2145717	6364	-	LOC_Os04g04490	-702	sp|Q7LHG5|YI31B_YEAST Transposon Ty3-I Gag-Pol polyprotein OS=Saccharomyces cerevisiae (strain ATCC 204508 / S288c) GN=TY3B-I PE=3 SV=2//1.22897e-110
Chr4	2189997	2190263	267	Promoter (<=1kb)	2190800	2194809	4010	+	LOC_Os04g04590	-537	sp|P0CT39|TF26_SCHPO Transposon Tf2-6 polyprotein OS=Schizosaccharomyces pombe (strain 972 / ATCC 24843) GN=Tf2-6 PE=3 SV=1//3.00543e-143
Chr4	2414599	2414794	196	Promoter (<=1kb)	2413801	2415039	1239	+	LOC_Os04g04980	798	sp|P50134|DCOR_DATST Ornithine decarboxylase OS=Datura stramonium PE=2 SV=1//3.11617e-42
Chr4	2493501	2493696	196	Promoter (<=1kb)	2493571	2495303	1733	+	LOC_Os04g05060	0	sp|Q9FMV7|C94B1_ARATH Cytochrome P450 94B1 OS=Arabidopsis thaliana GN=CYP94B1 PE=2 SV=1//2.12792e-13
Chr4	2654541	2654994	454	Promoter (<=1kb)	2649112	2654637	5526	-	LOC_Os04g05330	0	sp|Q9LXA5|LRK91_ARATH L-type lectin-domain containing receptor kinase IX.1 OS=Arabidopsis thaliana GN=LECRK91 PE=2 SV=1//8.5462e-35
Chr4	3176600	3176876	277	Promoter (<=1kb)	3172266	3176786	4521	-	LOC_Os04g06110	0	sp|Q7LHG5|YI31B_YEAST Transposon Ty3-I Gag-Pol polyprotein OS=Saccharomyces cerevisiae (strain ATCC 204508 / S288c) GN=TY3B-I PE=3 SV=2//4.54061e-87
Chr4	3185100	3185320	221	Promoter (2-3kb)	3181860	3183062	1203	-	LOC_Os04g06120	-2038	sp|Q99315|YG31B_YEAST Transposon Ty3-G Gag-Pol polyprotein OS=Saccharomyces cerevisiae (strain ATCC 204508 / S288c) GN=TY3B-G PE=1 SV=3//4.58553e-60
Chr4	3485691	3485886	196	Promoter (<=1kb)	3480785	3486172	5388	-	LOC_Os04g06610	286	sp|P0CT39|TF26_SCHPO Transposon Tf2-6 polyprotein OS=Schizosaccharomyces pombe (strain 972 / ATCC 24843) GN=Tf2-6 PE=3 SV=1//5.16437e-19
Chr4	3486140	3486335	196	Promoter (<=1kb)	3480785	3486172	5388	-	LOC_Os04g06610	0	sp|P0CT39|TF26_SCHPO Transposon Tf2-6 polyprotein OS=Schizosaccharomyces pombe (strain 972 / ATCC 24843) GN=Tf2-6 PE=3 SV=1//5.16437e-19
Chr4	3618048	3618307	260	Promoter (<=1kb)	3617349	3617974	626	-	LOC_Os04g06860	-74	sp|Q9XIV8|PERN1_TOBAC Peroxidase N1 OS=Nicotiana tabacum GN=poxN1 PE=1 SV=1//2.46261e-24
Chr4	3928572	3929122	551	Promoter (<=1kb)	3928870	3931610	2741	+	LOC_Os04g07380	0	sp|P0CT39|TF26_SCHPO Transposon Tf2-6 polyprotein OS=Schizosaccharomyces pombe (strain 972 / ATCC 24843) GN=Tf2-6 PE=3 SV=1//2.84293e-42
Chr4	4463213	4463492	280	Promoter (<=1kb)	4463046	4463552	507	+	LOC_Os04g08360	167	sp|P07898|PGCA_CHICK Aggrecan core protein OS=Gallus gallus GN=ACAN PE=1 SV=2//8.39664e-07
Chr4	4613332	4613572	241	Promoter (2-3kb)	4608252	4611232	2981	-	LOC_Os04g08520	-2100	sp|P10978|POLX_TOBAC Retrovirus-related Pol polyprotein from transposon TNT 1-94 OS=Nicotiana tabacum PE=2 SV=1//8.58786e-08
Chr4	4614646	4614851	206	Distal Intergenic	4608252	4611232	2981	-	LOC_Os04g08520	-3414	sp|P10978|POLX_TOBAC Retrovirus-related Pol polyprotein from transposon TNT 1-94 OS=Nicotiana tabacum PE=2 SV=1//8.58786e-08
Chr4	4640579	4640855	277	Promoter (<=1kb)	4637978	4640929	2952	-	LOC_Os04g08550	74	sp|Q7G765|NADO2_ORYSJ Probable NAD(P)H-dependent oxidoreductase 2 OS=Oryza sativa subsp. japonica GN=Os10g0113100 PE=2 SV=1//2.83436e-89
Chr4	5113090	5113285	196	Promoter (<=1kb)	5111680	5113638	1959	-	LOC_Os04g09530	353	sp|Q9ZQE5|PP153_ARATH Pentatricopeptide repeat-containing protein At2g15690 OS=Arabidopsis thaliana GN=PCMP-H66 PE=2 SV=2//6.52512e-131
Chr4	5113428	5113703	276	Promoter (<=1kb)	5111680	5113638	1959	-	LOC_Os04g09530	0	sp|Q9ZQE5|PP153_ARATH Pentatricopeptide repeat-containing protein At2g15690 OS=Arabidopsis thaliana GN=PCMP-H66 PE=2 SV=2//6.52512e-131
Chr4	5686634	5686920	287	Promoter (<=1kb)	5686452	5689491	3040	+	LOC_Os04g10460	182	sp|Q9URY4|YI01_SCHPO Putative amidase C869.01 OS=Schizosaccharomyces pombe (strain 972 / ATCC 24843) GN=SPAC869.01 PE=3 SV=1//6.37295e-71
Chr4	5977612	5977872	261	Promoter (1-2kb)	5976513	5979397	2885	-	LOC_Os04g11004	1525	sp|P20825|POL2_DROME Retrovirus-related Pol polyprotein from transposon 297 OS=Drosophila melanogaster GN=pol PE=3 SV=1//1.68399e-67
Chr4	6197545	6197742	198	Promoter (<=1kb)	6193694	6198710	5017	-	LOC_Os04g11350	968	sp|Q99315|YG31B_YEAST Transposon Ty3-G Gag-Pol polyprotein OS=Saccharomyces cerevisiae (strain ATCC 204508 / S288c) GN=TY3B-G PE=1 SV=3//1.72429e-122
Chr4	6563816	6564043	228	Promoter (<=1kb)	6564625	6566887	2263	+	LOC_Os04g11970	-582	sp|A8QW53|OMT3_SORBI 5-pentadecatrienyl resorcinol O-methyltransferase OS=Sorghum bicolor GN=OMT3 PE=1 SV=1//5.03087e-80
Chr4	6591751	6591946	196	Promoter (<=1kb)	6586946	6591295	4350	-	LOC_Os04g12000	-456	sp|P10978|POLX_TOBAC Retrovirus-related Pol polyprotein from transposon TNT 1-94 OS=Nicotiana tabacum PE=2 SV=1//0
Chr4	6713629	6713905	277	Promoter (<=1kb)	6714434	6716387	1954	+	LOC_Os04g12190	-529	sp|Q5SVZ6|ZMYM1_HUMAN Zinc finger MYM-type protein 1 OS=Homo sapiens GN=ZMYM1 PE=2 SV=1//1.06339e-26
Chr4	6778952	6779250	299	Promoter (<=1kb)	6779686	6781980	2295	+	LOC_Os04g12280	-436	sp|Q7LHG5|YI31B_YEAST Transposon Ty3-I Gag-Pol polyprotein OS=Saccharomyces cerevisiae (strain ATCC 204508 / S288c) GN=TY3B-I PE=3 SV=2//1.14223e-46
Chr4	6873744	6873939	196	Promoter (<=1kb)	6873850	6878134	4285	+	LOC_Os04g12440	0	sp|P11369|LORF2_MOUSE LINE-1 retrotransposable element ORF2 protein OS=Mus musculus GN=Pol PE=1 SV=2//8.86046e-20
Chr4	7028392	7028880	489	Promoter (<=1kb)	7028330	7028947	618	-	LOC_Os04g12710	67	sp|Q6X1C0|GLT2_CROSA Crocetin glucosyltransferase 2 OS=Crocus sativus GN=GLT2 PE=1 SV=1//6.44077e-32
Chr4	7121830	7122130	301	Promoter (<=1kb)	7121637	7125646	4010	+	LOC_Os04g12890	193	sp|O22820|U74F1_ARATH UDP-glycosyltransferase 74F1 OS=Arabidopsis thaliana GN=UGT74F1 PE=1 SV=1//1.58529e-11
Chr4	7151551	7151772	222	Promoter (<=1kb)	7150261	7151972	1712	-	LOC_Os04g12950	200	sp|Q9SYK9|U74E2_ARATH UDP-glycosyltransferase 74E2 OS=Arabidopsis thaliana GN=UGT74E2 PE=1 SV=1//6.58739e-96
Chr4	7159283	7159478	196	Promoter (<=1kb)	7156820	7159820	3001	-	LOC_Os04g12970	342	sp|Q9SYK9|U74E2_ARATH UDP-glycosyltransferase 74E2 OS=Arabidopsis thaliana GN=UGT74E2 PE=1 SV=1//8.21153e-106
Chr4	7469498	7469721	224	Distal Intergenic	7473148	7475277	2130	+	LOC_Os04g13430	-3427	sp|P0C2F6|RNHX1_ARATH Putative ribonuclease H protein At1g65750 OS=Arabidopsis thaliana GN=At1g65750 PE=3 SV=1//8.37545e-09
Chr4	7566273	7566470	198	Promoter (<=1kb)	7560997	7566380	5384	-	LOC_Os04g13550	0	sp|P04146|COPIA_DROME Copia protein OS=Drosophila melanogaster GN=GIP PE=1 SV=3//2.33695e-46
Chr4	7687365	7687560	196	Distal Intergenic	7679456	7683795	4340	-	LOC_Os04g13780	-3570	sp|Q99315|YG31B_YEAST Transposon Ty3-G Gag-Pol polyprotein OS=Saccharomyces cerevisiae (strain ATCC 204508 / S288c) GN=TY3B-G PE=1 SV=3//3.82024e-34
Chr4	7727239	7727434	196	Promoter (<=1kb)	7727860	7731160	3301	+	LOC_Os04g13860	-426	sp|Q99315|YG31B_YEAST Transposon Ty3-G Gag-Pol polyprotein OS=Saccharomyces cerevisiae (strain ATCC 204508 / S288c) GN=TY3B-G PE=1 SV=3//4.44854e-12
Chr4	7897906	7898188	283	Promoter (<=1kb)	7893474	7897863	4390	-	LOC_Os04g14130	-43	sp|Q9LFL5|PP390_ARATH Pentatricopeptide repeat-containing protein At5g16860 OS=Arabidopsis thaliana GN=PCMP-H92 PE=2 SV=1//0
Chr4	8165584	8165928	345	Promoter (<=1kb)	8153071	8165178	12108	-	LOC_Os04g14560	-406	sp|C0LGP4|Y3475_ARATH Probable LRR receptor-like serine/threonine-protein kinase At3g47570 OS=Arabidopsis thaliana GN=At3g47570 PE=2 SV=1//1.42751e-40
Chr4	8314014	8314319	306	Promoter (<=1kb)	8307223	8314255	7033	-	LOC_Os04g14790	0	sp|Q9SS48|SDP6_ARATH Glycerol-3-phosphate dehydrogenase SDP6, mitochondrial OS=Arabidopsis thaliana GN=SDP6 PE=1 SV=1//0
Chr4	8320909	8321104	196	Promoter (<=1kb)	8320563	8321450	888	-	LOC_Os04g14810	346	sp|Q84LH3|WEX_ARATH Werner Syndrome-like exonuclease OS=Arabidopsis thaliana GN=WEX PE=1 SV=1//9.12891e-16
Chr4	8381259	8381479	221	Promoter (<=1kb)	8373148	8380859	7712	-	LOC_Os04g14890	-400	sp|P04323|POL3_DROME Retrovirus-related Pol polyprotein from transposon 17.6 OS=Drosophila melanogaster GN=pol PE=3 SV=1//1.52888e-64
Chr4	8446348	8446556	209	Promoter (1-2kb)	8445204	8448857	3654	+	LOC_Os04g15530	1144	sp|Q9SD62|Y3471_ARATH Putative receptor-like protein kinase At3g47110 OS=Arabidopsis thaliana GN=At3g47110 PE=3 SV=1//5.09652e-06
Chr4	8619958	8620370	413	Promoter (<=1kb)	8620300	8627985	7686	+	LOC_Os04g15890	0	sp|P0CT39|TF26_SCHPO Transposon Tf2-6 polyprotein OS=Schizosaccharomyces pombe (strain 972 / ATCC 24843) GN=Tf2-6 PE=3 SV=1//1.82164e-118
Chr4	8636360	8636662	303	Promoter (<=1kb)	8633168	8636566	3399	-	LOC_Os04g15910	0	sp|Q5SVZ6|ZMYM1_HUMAN Zinc finger MYM-type protein 1 OS=Homo sapiens GN=ZMYM1 PE=2 SV=1//6.01706e-16
Chr4	8663308	8663754	447	Promoter (<=1kb)	8657283	8663482	6200	-	LOC_Os04g15944	0	sp|Q99315|YG31B_YEAST Transposon Ty3-G Gag-Pol polyprotein OS=Saccharomyces cerevisiae (strain ATCC 204508 / S288c) GN=TY3B-G PE=1 SV=3//6.91587e-112
Chr4	8938343	8938726	384	Promoter (1-2kb)	8930358	8937028	6671	-	LOC_Os04g16430	-1315	sp|P0CT39|TF26_SCHPO Transposon Tf2-6 polyprotein OS=Schizosaccharomyces pombe (strain 972 / ATCC 24843) GN=Tf2-6 PE=3 SV=1//1.13734e-145
Chr4	8970185	8970449	265	Promoter (<=1kb)	8971392	8977568	6177	+	LOC_Os04g16510	-943	sp|Q7LHG5|YI31B_YEAST Transposon Ty3-I Gag-Pol polyprotein OS=Saccharomyces cerevisiae (strain ATCC 204508 / S288c) GN=TY3B-I PE=3 SV=2//2.62286e-107
Chr4	9372643	9372913	271	Distal Intergenic	9367935	9369158	1224	-	LOC_Os04g17100	-3485	sp|Q9SZN7|HIP26_ARATH Heavy metal-associated isoprenylated plant protein 26 OS=Arabidopsis thaliana GN=HIPP26 PE=1 SV=1//2.41005e-56
Chr4	9956733	9956928	196	Promoter (<=1kb)	9939614	9956327	16714	-	LOC_Os04g18030	-406	sp|Q7XWP3|SEC1A_ORYSJ Probable protein transport Sec1a OS=Oryza sativa subsp. japonica GN=Os04g0252400 PE=3 SV=2//1.49294e-08
Chr4	9994670	9994956	287	Promoter (1-2kb)	9993501	9994514	1014	+	LOC_Os04g18090	1169	sp|P40267|H1_SOLPN Histone H1 OS=Solanum pennellii PE=2 SV=1//2.69087e-24
Chr4	10094846	10095041	196	Promoter (<=1kb)	10085000	10094914	9915	-	LOC_Os04g18244	0	sp|P10978|POLX_TOBAC Retrovirus-related Pol polyprotein from transposon TNT 1-94 OS=Nicotiana tabacum PE=2 SV=1//8.09317e-10
Chr4	10114689	10114884	196	Promoter (<=1kb)	10114490	10122224	7735	+	LOC_Os04g18330	199	sp|P0CT39|TF26_SCHPO Transposon Tf2-6 polyprotein OS=Schizosaccharomyces pombe (strain 972 / ATCC 24843) GN=Tf2-6 PE=3 SV=1//2.73592e-26
Chr4	10159066	10159293	228	Promoter (<=1kb)	10159057	10164503	5447	+	LOC_Os04g18400	9	sp|P20825|POL2_DROME Retrovirus-related Pol polyprotein from transposon 297 OS=Drosophila melanogaster GN=pol PE=3 SV=1//8.633e-40
Chr4	10388307	10388664	358	Promoter (<=1kb)	10388346	10397002	8657	+	LOC_Os04g18730	0	sp|Q9UR07|TF211_SCHPO Transposon Tf2-11 polyprotein OS=Schizosaccharomyces pombe (strain 972 / ATCC 24843) GN=Tf2-11 PE=3 SV=1//1.97987e-08
Chr4	10388987	10389200	214	Promoter (<=1kb)	10388346	10397002	8657	+	LOC_Os04g18730	641	sp|Q9UR07|TF211_SCHPO Transposon Tf2-11 polyprotein OS=Schizosaccharomyces pombe (strain 972 / ATCC 24843) GN=Tf2-11 PE=3 SV=1//1.97987e-08
Chr4	10433270	10433465	196	Promoter (2-3kb)	10435610	10440943	5334	+	LOC_Os04g18770	-2145	sp|P04146|COPIA_DROME Copia protein OS=Drosophila melanogaster GN=GIP PE=1 SV=3//5.45197e-44
Chr4	10476181	10476623	443	Promoter (1-2kb)	10474689	10475396	708	+	LOC_Os04g18830	1492	sp|Q9SRV1|BPM4_ARATH BTB/POZ and MATH domain-containing protein 4 OS=Arabidopsis thaliana GN=BPM4 PE=1 SV=1//2.32464e-06
Chr4	10616142	10616516	375	Promoter (1-2kb)	10611099	10617668	6570	-	LOC_Os04g19114	1152	sp|Q8I7P9|POL5_DROME Retrovirus-related Pol polyprotein from transposon opus OS=Drosophila melanogaster GN=pol PE=3 SV=1//1.1831e-37
Chr4	10703870	10704182	313	Promoter (<=1kb)	10700449	10704896	4448	-	LOC_Os04g19260	714	sp|Q99315|YG31B_YEAST Transposon Ty3-G Gag-Pol polyprotein OS=Saccharomyces cerevisiae (strain ATCC 204508 / S288c) GN=TY3B-G PE=1 SV=3//2.47881e-99
Chr4	10905173	10905483	311	Promoter (<=1kb)	10905399	10915910	10512	+	LOC_Os04g19590	0	sp|Q99315|YG31B_YEAST Transposon Ty3-G Gag-Pol polyprotein OS=Saccharomyces cerevisiae (strain ATCC 204508 / S288c) GN=TY3B-G PE=1 SV=3//1.26059e-142
Chr4	10919315	10919563	249	Promoter (1-2kb)	10919835	10920908	1074	-	LOC_Os04g19600	1345	sp|P0CT40|TF29_SCHPO Transposon Tf2-9 polyprotein OS=Schizosaccharomyces pombe (strain 972 / ATCC 24843) GN=Tf2-9 PE=3 SV=1//7.99764e-41
Chr4	11141881	11142370	490	Promoter (1-2kb)	11140570	11147497	6928	+	LOC_Os04g19990	1311	sp|P10978|POLX_TOBAC Retrovirus-related Pol polyprotein from transposon TNT 1-94 OS=Nicotiana tabacum PE=2 SV=1//4.52706e-15
Chr4	11247103	11247392	290	Promoter (<=1kb)	11247240	11254759	7520	+	LOC_Os04g20180	0	sp|Q6NMR9|GDL84_ARATH GDSL esterase/lipase At5g45920 OS=Arabidopsis thaliana GN=At5g45920 PE=2 SV=1//7.83944e-25
Chr4	11334727	11334948	222	Promoter (<=1kb)	11335426	11338820	3395	+	LOC_Os04g20280	-478	sp|Q7XSZ4|HACDA_ORYSJ Very-long-chain (3R)-3-hydroxyacyl-CoA dehydratase PASTICCINO 2A OS=Oryza sativa subsp. japonica GN=PAS2A PE=2 SV=2//1.01316e-138
Chr4	11410730	11410925	196	Promoter (<=1kb)	11408523	11410376	1854	-	LOC_Os04g20400	-354	sp|Q9LXV0|U92A1_ARATH UDP-glycosyltransferase 92A1 OS=Arabidopsis thaliana GN=UGT92A1 PE=2 SV=1//1.47777e-86
Chr4	11709370	11709634	265	Promoter (<=1kb)	11708755	11712431	3677	+	LOC_Os04g20860	615	sp|P10978|POLX_TOBAC Retrovirus-related Pol polyprotein from transposon TNT 1-94 OS=Nicotiana tabacum PE=2 SV=1//5.58733e-97
Chr4	11814706	11814901	196	Promoter (<=1kb)	11801164	11814990	13827	-	LOC_Os04g20990	89	sp|Q9KUX9|DUSA_VIBCH tRNA-dihydrouridine(20/20a) synthase OS=Vibrio cholerae serotype O1 (strain ATCC 39315 / El Tor Inaba N16961) GN=dusA PE=3 SV=1//3.03678e-77
Chr4	11856747	11856994	248	Promoter (2-3kb)	11859318	11861900	2583	+	LOC_Os04g21100	-2324	sp|P10978|POLX_TOBAC Retrovirus-related Pol polyprotein from transposon TNT 1-94 OS=Nicotiana tabacum PE=2 SV=1//2.74013e-30
Chr4	11983394	11983777	384	Promoter (<=1kb)	11980119	11983851	3733	-	LOC_Os04g21250	74	sp|P0CT40|TF29_SCHPO Transposon Tf2-9 polyprotein OS=Schizosaccharomyces pombe (strain 972 / ATCC 24843) GN=Tf2-9 PE=3 SV=1//3.78786e-143
Chr4	12300108	12300324	217	Promoter (<=1kb)	12300235	12302887	2653	+	LOC_Os04g21740	0	sp|Q5SVZ6|ZMYM1_HUMAN Zinc finger MYM-type protein 1 OS=Homo sapiens GN=ZMYM1 PE=2 SV=1//9.90284e-07
Chr4	12451993	12452196	204	Promoter (<=1kb)	12447709	12452884	5176	-	LOC_Os04g21990	688	sp|P10978|POLX_TOBAC Retrovirus-related Pol polyprotein from transposon TNT 1-94 OS=Nicotiana tabacum PE=2 SV=1//2.92635e-11
Chr4	12452843	12453087	245	Promoter (<=1kb)	12447709	12452884	5176	-	LOC_Os04g21990	0	sp|P10978|POLX_TOBAC Retrovirus-related Pol polyprotein from transposon TNT 1-94 OS=Nicotiana tabacum PE=2 SV=1//2.92635e-11
Chr4	12739075	12739426	352	Promoter (2-3kb)	12733189	12736758	3570	-	LOC_Os04g22490	-2317	sp|P0CT39|TF26_SCHPO Transposon Tf2-6 polyprotein OS=Schizosaccharomyces pombe (strain 972 / ATCC 24843) GN=Tf2-6 PE=3 SV=1//1.48097e-140
Chr4	12781895	12782407	513	Promoter (<=1kb)	12774503	12781863	7361	-	LOC_Os04g22570	-32	sp|Q8I7P9|POL5_DROME Retrovirus-related Pol polyprotein from transposon opus OS=Drosophila melanogaster GN=pol PE=3 SV=1//9.93937e-43
Chr4	12958600	12958848	249	Promoter (1-2kb)	12955765	12959917	4153	-	LOC_Os04g22870	1069	sp|Q6AWV1|POP5_ARATH Probable ribonuclease P/MRP protein subunit POP5 OS=Arabidopsis thaliana GN=EMB1687 PE=2 SV=1//4.02365e-39
Chr4	13036917	13037404	488	Promoter (<=1kb)	13033955	13036977	3023	-	LOC_Os04g22970	0	sp|P23074|POL_SFV1 Pro-Pol polyprotein OS=Simian foamy virus type 1 GN=pol PE=1 SV=3//3.49887e-24
Chr4	13201953	13202229	277	Promoter (<=1kb)	13202165	13216097	13933	+	LOC_Os04g23210	0	sp|Q54GS1|CL16A_DICDI Protein CLEC16A homolog OS=Dictyostelium discoideum GN=DDB_G0289943 PE=3 SV=1//1.07597e-47
Chr4	13497438	13498035	598	Promoter (<=1kb)	13493211	13498065	4855	-	LOC_Os04g23580	30	sp|Q5QQ50|XYLT2_CANFA Xylosyltransferase 2 OS=Canis familiaris GN=XYLT2 PE=2 SV=1//5.98274e-14
Chr4	13998557	13998874	318	Promoter (<=1kb)	13989149	13997590	8442	-	LOC_Os04g24410	-967	sp|P0CD23|NU2C2_ORYSJ NAD(P)H-quinone oxidoreductase subunit 2 B, chloroplastic OS=Oryza sativa subsp. japonica GN=ndhB2 PE=2 SV=1//3.75312e-45
Chr4	14135930	14136278	349	Promoter (<=1kb)	14131645	14135790	4146	-	LOC_Os04g24610	-140	sp|Q10716|CYSP1_MAIZE Cysteine proteinase 1 OS=Zea mays GN=CCP1 PE=2 SV=1//3.27349e-48
Chr4	14306344	14306867	524	Promoter (<=1kb)	14300447	14306646	6200	-	LOC_Os04g24840	0	sp|Q9LMF1|U85A3_ARATH UDP-glycosyltransferase 85A3 OS=Arabidopsis thaliana GN=UGT85A3 PE=2 SV=2//4.87383e-34
Chr4	14675437	14675657	221	Promoter (<=1kb)	14675329	14677874	2546	+	LOC_Os04g25360	108	sp|Q80XC2|TRM61_MOUSE tRNA (adenine(58)-N(1))-methyltransferase catalytic subunit TRMT61A OS=Mus musculus GN=Trmt61a PE=2 SV=1//5.30271e-56
Chr4	14679596	14679791	196	Promoter (<=1kb)	14680107	14681661	1555	+	LOC_Os04g25370	-316	sp|F8WKW1|UGT2_GARJA 7-deoxyloganetin glucosyltransferase OS=Gardenia jasminoides GN=UGT85A24 PE=1 SV=1//8.22322e-180
Chr4	14710740	14710980	241	Promoter (<=1kb)	14711401	14716828	5428	+	LOC_Os04g25400	-421	sp|Q7XTG7|HCAR_ORYSJ 7-hydroxymethyl chlorophyll a reductase, chloroplastic OS=Oryza sativa subsp. japonica GN=HCAR PE=3 SV=2//0
Chr4	14743792	14744085	294	Promoter (<=1kb)	14742171	14744334	2164	-	LOC_Os04g25440	249	sp|F8WKW1|UGT2_GARJA 7-deoxyloganetin glucosyltransferase OS=Gardenia jasminoides GN=UGT85A24 PE=1 SV=1//1.61948e-164
Chr4	14818159	14818399	241	Promoter (<=1kb)	14813270	14819280	6011	-	LOC_Os04g25560	881	sp|P37890|CBP1_ORYSJ Serine carboxypeptidase 1 OS=Oryza sativa subsp. japonica GN=CBP1 PE=2 SV=1//2.01809e-13
Chr4	14864480	14864732	253	Promoter (<=1kb)	14863453	14864827	1375	-	LOC_Os04g25650	95	sp|Q9LRJ9|CRR38_ARATH Cysteine-rich repeat secretory protein 38 OS=Arabidopsis thaliana GN=CRRSP38 PE=2 SV=1//2.04989e-13
Chr4	15043880	15044273	394	Promoter (<=1kb)	15042562	15044709	2148	-	LOC_Os04g25880	436	sp|Q93ZT5|EDL3_ARATH EID1-like F-box protein 3 OS=Arabidopsis thaliana GN=EDL3 PE=2 SV=1//9.96135e-07
Chr4	16243885	16244255	371	Promoter (<=1kb)	16242233	16243638	1406	-	LOC_Os04g27480	-247	sp|O49853|DCS4_GOSAR (+)-delta-cadinene synthase isozyme C2 OS=Gossypium arboreum GN=CAD1-C2 PE=2 SV=1//8.6629e-13
Chr4	16311627	16311822	196	Promoter (<=1kb)	16307162	16311142	3981	-	LOC_Os04g27560	-485	sp|Q8I7P9|POL5_DROME Retrovirus-related Pol polyprotein from transposon opus OS=Drosophila melanogaster GN=pol PE=3 SV=1//5.39742e-44
Chr4	16416213	16416415	203	Distal Intergenic	16419959	16424898	4940	+	LOC_Os04g27790	-3544	sp|D2YZP9|BISS_ZINOF (S)-beta-bisabolene synthase OS=Zingiber officinale GN=TPS1 PE=1 SV=1//5.49758e-128
Chr4	16420934	16421148	215	Promoter (<=1kb)	16419959	16424898	4940	+	LOC_Os04g27790	975	sp|D2YZP9|BISS_ZINOF (S)-beta-bisabolene synthase OS=Zingiber officinale GN=TPS1 PE=1 SV=1//5.49758e-128
Chr4	16474875	16475070	196	Promoter (<=1kb)	16469505	16475441	5937	-	LOC_Os04g27890	371	sp|P04323|POL3_DROME Retrovirus-related Pol polyprotein from transposon 17.6 OS=Drosophila melanogaster GN=pol PE=3 SV=1//1.66068e-37
Chr4	16475166	16475361	196	Promoter (<=1kb)	16469505	16475441	5937	-	LOC_Os04g27890	80	sp|P04323|POL3_DROME Retrovirus-related Pol polyprotein from transposon 17.6 OS=Drosophila melanogaster GN=pol PE=3 SV=1//1.66068e-37
Chr4	16509107	16509424	318	Promoter (<=1kb)	16505773	16509512	3740	-	LOC_Os04g27960	88	sp|Q7XS75|Y4469_ORYSJ Putative B3 domain-containing protein Os04g0346900 OS=Oryza sativa subsp. japonica GN=Os04g0346900 PE=3 SV=2//0
Chr4	16530432	16530732	301	Promoter (<=1kb)	16530280	16530788	509	+	LOC_Os04g27990	152	sp|Q7XS74|Y4474_ORYSJ Putative B3 domain-containing protein Os04g0347400 OS=Oryza sativa subsp. japonica GN=Os04g0347400 PE=3 SV=3//4.89187e-29
Chr4	16722296	16722491	196	Distal Intergenic	16713624	16714138	515	-	LOC_Os04g28270	-8158	sp|Q6K9G1|AMT12_ORYSJ Ammonium transporter 1 member 2 OS=Oryza sativa subsp. japonica GN=AMT1-2 PE=2 SV=1//7.62893e-14
Chr4	16754982	16755196	215	Promoter (1-2kb)	16753556	16757223	3668	+	LOC_Os04g28300	1426	sp|Q76C99|RF1_ORYSI Protein Rf1, mitochondrial OS=Oryza sativa subsp. indica GN=Rf1 PE=2 SV=1//3.27732e-42
Chr4	17113345	17113540	196	Distal Intergenic	17116916	17123581	6666	+	LOC_Os04g28880	-3376	sp|Q8I7P9|POL5_DROME Retrovirus-related Pol polyprotein from transposon opus OS=Drosophila melanogaster GN=pol PE=3 SV=1//2.87786e-38
Chr4	18121270	18121465	196	Promoter (<=1kb)	18121428	18126139	4712	+	LOC_Os04g30370	0	sp|Q7X8C5|WAKLB_ARATH Wall-associated receptor kinase-like 2 OS=Arabidopsis thaliana GN=WAKL2 PE=2 SV=1//2.19046e-73
Chr4	18121817	18122207	391	Promoter (<=1kb)	18121428	18126139	4712	+	LOC_Os04g30370	389	sp|Q7X8C5|WAKLB_ARATH Wall-associated receptor kinase-like 2 OS=Arabidopsis thaliana GN=WAKL2 PE=2 SV=1//2.19046e-73
Chr4	18366720	18366954	235	Promoter (<=1kb)	18361189	18366200	5012	-	LOC_Os04g30720	-520	sp|Q5REP4|KIF22_PONAB Kinesin-like protein KIF22 OS=Pongo abelii GN=KIF22 PE=2 SV=1//3.18207e-24
Chr4	18387446	18387676	231	Promoter (<=1kb)	18382668	18387888	5221	-	LOC_Os04g30760	212	sp|P28643|FABG_CUPLA 3-oxoacyl-[acyl-carrier-protein] reductase, chloroplastic OS=Cuphea lanceolata GN=CLKR27 PE=2 SV=1//2.97424e-127
Chr4	18780127	18780360	234	Promoter (<=1kb)	18779621	18783455	3835	+	LOC_Os04g31400	506	sp|Q66GQ2|Y5162_ARATH Uncharacterized protein At5g41620 OS=Arabidopsis thaliana GN=At5g41620 PE=2 SV=2//5.90532e-21
Chr4	18905927	18906286	360	Promoter (<=1kb)	18905455	18907157	1703	-	LOC_Os04g31610	871	sp|Q9FYF9|FB76_ARATH F-box protein At1g67340 OS=Arabidopsis thaliana GN=At1g67340 PE=1 SV=1//5.15762e-92
Chr4	18948926	18949330	405	Promoter (<=1kb)	18948900	18950368	1469	+	LOC_Os04g31630	26	sp|Q69S39|UCRIA_ORYSJ Cytochrome b6-f complex iron-sulfur subunit, chloroplastic OS=Oryza sativa subsp. japonica GN=petC PE=1 SV=1//1.06452e-12
Chr4	19143784	19144112	329	Promoter (<=1kb)	19142083	19144072	1990	-	LOC_Os04g31960	0	sp|Q7XKQ8|ILVB2_ORYSJ Probable acetolactate synthase 2, chloroplastic OS=Oryza sativa subsp. japonica GN=ALS2 PE=2 SV=2//0
Chr4	19174012	19174236	225	Promoter (1-2kb)	19175703	19179290	3588	+	LOC_Os04g32020	-1467	sp|Q54JE4|ODO1_DICDI 2-oxoglutarate dehydrogenase, mitochondrial OS=Dictyostelium discoideum GN=ogdh PE=3 SV=1//2.19716e-20
Chr4	19504486	19504784	299	Promoter (<=1kb)	19498263	19504802	6540	-	LOC_Os04g32490	18	sp|P44439|PCNB_HAEIN Poly(A) polymerase I OS=Haemophilus influenzae (strain ATCC 51907 / DSM 11121 / KW20 / Rd) GN=pcnB PE=3 SV=1//3.8416e-35
Chr4	19563948	19564331	384	Promoter (<=1kb)	19564239	19566320	2082	+	LOC_Os04g32510	0	sp|Q94AY3|DRIP2_ARATH E3 ubiquitin protein ligase DRIP2 OS=Arabidopsis thaliana GN=DRIP2 PE=1 SV=1//2.19933e-07
Chr4	19609143	19609406	264	Promoter (<=1kb)	19608390	19609181	792	-	LOC_Os04g32570	0	sp|Q38851|MYB6_ARATH Transcription repressor MYB6 OS=Arabidopsis thaliana GN=MYB6 PE=1 SV=1//1.2314e-22
Chr4	19709801	19710004	204	Promoter (<=1kb)	19695368	19709974	14607	-	LOC_Os04g32690	0	sp|Q54IR8|STRUM_DICDI WASH complex subunit strumpellin homolog OS=Dictyostelium discoideum GN=DDB_G0288569 PE=1 SV=1//7.61875e-23
Chr4	19763095	19763915	821	Promoter (2-3kb)	19766026	19771877	5852	+	LOC_Os04g32770	-2111	sp|P0CT40|TF29_SCHPO Transposon Tf2-9 polyprotein OS=Schizosaccharomyces pombe (strain 972 / ATCC 24843) GN=Tf2-9 PE=3 SV=1//5.67376e-123
Chr4	20094540	20094793	254	Promoter (<=1kb)	20094182	20099729	5548	+	LOC_Os04g33210	358	sp|Q7XL03|CLPD2_ORYSJ Chaperone protein ClpD2, chloroplastic OS=Oryza sativa subsp. japonica GN=CLPD2 PE=2 SV=2//1.2263e-166
Chr4	20102586	20102814	229	Promoter (<=1kb)	20099031	20103020	3990	-	LOC_Os04g33220	206	sp|Q7XL03|CLPD2_ORYSJ Chaperone protein ClpD2, chloroplastic OS=Oryza sativa subsp. japonica GN=CLPD2 PE=2 SV=2//1.03743e-16
Chr4	20145122	20145499	378	Promoter (<=1kb)	20144021	20145529	1509	-	LOC_Os04g33310	30	sp|Q56XJ7|Y4276_ARATH Uncharacterized protein At4g22758 OS=Arabidopsis thaliana GN=At4g22758 PE=2 SV=1//2.58168e-07
Chr4	20243157	20243376	220	Promoter (<=1kb)	20239790	20243460	3671	-	LOC_Os04g33460	84	sp|Q9LZS3|GLGB2_ARATH 1,4-alpha-glucan-branching enzyme 2-2, chloroplastic/amyloplastic OS=Arabidopsis thaliana GN=SBE2.2 PE=2 SV=1//7.37543e-112
Chr4	20470566	20470839	274	Promoter (<=1kb)	20470407	20474848	4442	+	LOC_Os04g33800	159	sp|Q03278|PO21_NASVI Retrovirus-related Pol polyprotein from type-1 retrotransposable element R2 (Fragment) OS=Nasonia vitripennis PE=3 SV=2//2.53129e-07
Chr4	20634958	20635153	196	Promoter (<=1kb)	20630032	20634254	4223	-	LOC_Os04g34070	-704	sp|P10978|POLX_TOBAC Retrovirus-related Pol polyprotein from transposon TNT 1-94 OS=Nicotiana tabacum PE=2 SV=1//0
Chr4	20691376	20691632	257	Promoter (<=1kb)	20690854	20692626	1773	+	LOC_Os04g34140	522	sp|Q9LSA6|PUB29_ARATH U-box domain-containing protein 29 OS=Arabidopsis thaliana GN=PUB29 PE=1 SV=1//2.29672e-16
Chr4	20691822	20692031	210	Promoter (<=1kb)	20690854	20692626	1773	+	LOC_Os04g34140	968	sp|Q9LSA6|PUB29_ARATH U-box domain-containing protein 29 OS=Arabidopsis thaliana GN=PUB29 PE=1 SV=1//2.29672e-16
Chr4	20858161	20858687	527	Promoter (<=1kb)	20852156	20858471	6316	-	LOC_Os04g34440	0	sp|Q4R528|F188A_MACFA Protein FAM188A OS=Macaca fascicularis GN=FAM188A PE=2 SV=1//4.86211e-50
Chr4	20925833	20926202	370	Promoter (<=1kb)	20925887	20928899	3013	+	LOC_Os04g34590	0	sp|Q9SMU4|U496N_ARATH UPF0496 protein At3g49070 OS=Arabidopsis thaliana GN=At3g49070 PE=2 SV=1//4.04447e-15
Chr4	21249271	21249466	196	Promoter (<=1kb)	21248865	21249599	735	-	LOC_Os04g34970	133	sp|Q70II3|EF110_ARATH Ethylene-responsive transcription factor ERF110 OS=Arabidopsis thaliana GN=ERF110 PE=2 SV=2//7.21208e-14
Chr4	21284981	21285176	196	Promoter (<=1kb)	21281712	21285260	3549	-	LOC_Os04g35020	84	sp|Q7PC71|CSLH2_ORYSI Cellulose synthase-like protein H2 OS=Oryza sativa subsp. indica GN=CSLH2 PE=3 SV=1//0
Chr4	21359125	21359391	267	Promoter (<=1kb)	21358864	21362109	3246	+	LOC_Os04g35140	261	sp|O65351|SBT17_ARATH Subtilisin-like protease SBT1.7 OS=Arabidopsis thaliana GN=SBT1.7 PE=1 SV=1//1.02789e-158
Chr4	21425240	21425435	196	Promoter (<=1kb)	21424207	21425721	1515	-	LOC_Os04g35250	286	sp|Q9CAN3|SCL28_ARATH Scarecrow-like protein 28 OS=Arabidopsis thaliana GN=SCL28 PE=1 SV=1//5.93963e-28
Chr4	21448166	21448377	212	Promoter (<=1kb)	21447896	21449455	1560	+	LOC_Os04g35270	270	sp|Q9C8W3|FUT13_ARATH Alpha-(1,4)-fucosyltransferase OS=Arabidopsis thaliana GN=FUT13 PE=2 SV=2//1.77228e-144
Chr4	21576057	21576252	196	Promoter (<=1kb)	21575732	21578431	2700	+	LOC_Os04g35450	325	sp|P23074|POL_SFV1 Pro-Pol polyprotein OS=Simian foamy virus type 1 GN=pol PE=1 SV=3//3.43198e-20
Chr4	21629478	21629710	233	Promoter (<=1kb)	21629566	21632840	3275	+	LOC_Os04g35530	0	sp|Q8VY52|PPD2_ARATH PsbP domain-containing protein 2, chloroplastic OS=Arabidopsis thaliana GN=PPD2 PE=1 SV=1//3.08674e-23
Chr4	21746812	21747351	540	Promoter (1-2kb)	21745662	21747557	1896	+	LOC_Os04g35680	1150	sp|Q9FLF4|PUB27_ARATH U-box domain-containing protein 27 OS=Arabidopsis thaliana GN=PUB27 PE=2 SV=1//2.55791e-19
Chr4	22143935	22144130	196	Promoter (<=1kb)	22143760	22144352	593	+	LOC_Os04g36650	175	sp|Q39261|ZFP2_ARATH Zinc finger protein 2 OS=Arabidopsis thaliana GN=ZFP2 PE=2 SV=1//1.59993e-10
Chr4	22220847	22221097	251	Promoter (<=1kb)	22216909	22221345	4437	-	LOC_Os04g36800	248	sp|P23902|KASC1_HORVU 3-oxoacyl-[acyl-carrier-protein] synthase I, chloroplastic OS=Hordeum vulgare GN=KAS12 PE=1 SV=1//0
Chr4	22369949	22370202	254	Promoter (<=1kb)	22369632	22376812	7181	+	LOC_Os04g37619	317	sp|Q0JCU7|ZEP_ORYSJ Zeaxanthin epoxidase, chloroplastic OS=Oryza sativa subsp. japonica GN=ZEP PE=2 SV=1//0
Chr4	22393633	22393927	295	Promoter (<=1kb)	22389303	22393831	4529	-	LOC_Os04g37660	0	sp|Q7XTC7|P2C40_ORYSJ Probable protein phosphatase 2C 40 OS=Oryza sativa subsp. japonica GN=Os04g0449400 PE=3 SV=3//0
Chr4	22409614	22409821	208	Promoter (2-3kb)	22411902	22412993	1092	+	LOC_Os04g37680	-2081	sp|Q9SX78|CXE2_ARATH Probable carboxylesterase 2 OS=Arabidopsis thaliana GN=CXE2 PE=2 SV=1//5.06675e-74
Chr4	22432189	22432600	412	Promoter (<=1kb)	22432173	22434744	2572	+	LOC_Os04g37720	16	sp|Q94B59|PP372_ARATH Pentatricopeptide repeat-containing protein At5g09450, mitochondrial OS=Arabidopsis thaliana GN=At5g09450 PE=2 SV=1//2.69986e-128
Chr4	22436069	22436387	319	Promoter (1-2kb)	22435061	22436870	1810	+	LOC_Os04g37730	1008	sp|Q8RXX9|ATL6_ARATH E3 ubiquitin-protein ligase ATL6 OS=Arabidopsis thaliana GN=ATL6 PE=1 SV=2//1.15177e-25
Chr4	22506849	22507089	241	Distal Intergenic	22494649	22499199	4551	-	LOC_Os04g37840	-7650	sp|P0CT40|TF29_SCHPO Transposon Tf2-9 polyprotein OS=Schizosaccharomyces pombe (strain 972 / ATCC 24843) GN=Tf2-9 PE=3 SV=1//5.45131e-156
Chr4	22736359	22736605	247	Promoter (<=1kb)	22735407	22737852	2446	+	LOC_Os04g38200	952	sp|P04146|COPIA_DROME Copia protein OS=Drosophila melanogaster GN=GIP PE=1 SV=3//7.56441e-25
Chr4	22840114	22840481	368	Promoter (<=1kb)	22837855	22840529	2675	-	LOC_Os04g38420	48	sp|Q9N126|RDH8_BOVIN Retinol dehydrogenase 8 OS=Bos taurus GN=RDH8 PE=1 SV=1//5.17572e-24
Chr4	22860361	22860660	300	Promoter (<=1kb)	22855359	22861007	5649	-	LOC_Os04g38450	347	sp|Q8VYW6|GAGT1_ARATH Gamma-glutamyltranspeptidase 1 OS=Arabidopsis thaliana GN=GGT1 PE=2 SV=1//0
Chr4	23228016	23228211	196	Promoter (<=1kb)	23226180	23228272	2093	-	LOC_Os04g39080	61	sp|Q9C8Y5|FBD6_ARATH FBD-associated F-box protein At1g66320 OS=Arabidopsis thaliana GN=At1g66320 PE=2 SV=1//6.23475e-09
Chr4	23236905	23237100	196	Promoter (<=1kb)	23235806	23237196	1391	-	LOC_Os04g39100	96	sp|Q9FJR1|PER65_ARATH Peroxidase 65 OS=Arabidopsis thaliana GN=PER65 PE=2 SV=2//4.95789e-108
Chr4	23310456	23310908	453	Promoter (<=1kb)	23305691	23311347	5657	-	LOC_Os04g39190	439	sp|D1CDT8|FTSH_THET1 ATP-dependent zinc metalloprotease FtsH OS=Thermobaculum terrenum (strain ATCC BAA-798 / YNP1) GN=ftsH PE=3 SV=1//1.64139e-83
Chr4	23314679	23314928	250	Promoter (<=1kb)	23315116	23319022	3907	+	LOC_Os04g39210	-188	sp|Q8GWW7|AGUA_ARATH Agmatine deiminase OS=Arabidopsis thaliana GN=AIH PE=1 SV=2//0
Chr4	23463631	23463850	220	Promoter (<=1kb)	23463357	23465733	2377	+	LOC_Os04g39420	274	sp|Q9FIK0|PFKA2_ARATH ATP-dependent 6-phosphofructokinase 2 OS=Arabidopsis thaliana GN=PFK2 PE=1 SV=1//0
Chr4	23511113	23511308	196	Promoter (<=1kb)	23510412	23512029	1618	-	LOC_Os04g39470	721	sp|Q9LSI7|MYB35_ARATH Transcription factor MYB35 OS=Arabidopsis thaliana GN=MYB35 PE=2 SV=1//5.21232e-57
Chr4	23511906	23512184	279	Promoter (<=1kb)	23510412	23512029	1618	-	LOC_Os04g39470	0	sp|Q9LSI7|MYB35_ARATH Transcription factor MYB35 OS=Arabidopsis thaliana GN=MYB35 PE=2 SV=1//5.21232e-57
Chr4	23687584	23687779	196	Promoter (<=1kb)	23682804	23688130	5327	-	LOC_Os04g39740	351	sp|Q7LHG5|YI31B_YEAST Transposon Ty3-I Gag-Pol polyprotein OS=Saccharomyces cerevisiae (strain ATCC 204508 / S288c) GN=TY3B-I PE=3 SV=2//1.24443e-34
Chr4	23817671	23817866	196	Promoter (<=1kb)	23815413	23817050	1638	-	LOC_Os04g40010	-621	sp|Q9SR00|PP213_ARATH Pentatricopeptide repeat-containing protein At3g04760, chloroplastic OS=Arabidopsis thaliana GN=At3g04760 PE=2 SV=1//5.47707e-19
Chr4	23826812	23827053	242	Promoter (<=1kb)	23826525	23829383	2859	+	LOC_Os04g40030	287	sp|Q94C27|FB84_ARATH F-box protein At1g70590 OS=Arabidopsis thaliana GN=At1g70590 PE=2 SV=1//2.50687e-58
Chr4	23835959	23836154	196	Promoter (<=1kb)	23829705	23836276	6572	-	LOC_Os04g40040	122	sp|Q07123|AMO2_ARTS1 Copper methylamine oxidase OS=Arthrobacter sp. (strain P1) GN=maoII PE=1 SV=1//1.98336e-167
Chr4	23885056	23885286	231	Promoter (<=1kb)	23882661	23885227	2567	-	LOC_Os04g40130	0	sp|Q9ZQF1|PP152_ARATH Pentatricopeptide repeat-containing protein At2g15630, mitochondrial OS=Arabidopsis thaliana GN=At2g15630 PE=3 SV=1//4.10671e-06
Chr4	24050458	24050803	346	Promoter (<=1kb)	24049070	24051142	2073	-	LOC_Os04g40470	339	sp|O81970|C71A9_SOYBN Cytochrome P450 71A9 OS=Glycine max GN=CYP71A9 PE=2 SV=1//6.51832e-102
Chr4	24102421	24102616	196	Promoter (<=1kb)	24101138	24102493	1356	-	LOC_Os04g40590	0	sp|Q9FJ75|WAXS4_ARATH Probable long-chain-alcohol O-fatty-acyltransferase 4 OS=Arabidopsis thaliana GN=AT4 PE=2 SV=1//2.97005e-37
Chr4	24116771	24116966	196	Promoter (<=1kb)	24115971	24118216	2246	+	LOC_Os04g40630	800	sp|Q9FMK7|BT1_ARATH BTB/POZ and TAZ domain-containing protein 1 OS=Arabidopsis thaliana GN=BT1 PE=1 SV=1//1.65494e-52
Chr4	24312823	24313018	196	Promoter (<=1kb)	24312618	24319913	7296	+	LOC_Os04g40970	205	sp|Q0WVW7|RQL5_ARATH ATP-dependent DNA helicase Q-like 5 OS=Arabidopsis thaliana GN=RECQL5 PE=2 SV=2//0
Chr4	24389431	24389678	248	Promoter (<=1kb)	24389132	24390928	1797	+	LOC_Os04g41120	299	sp|Q9SZK1|PP355_ARATH Pentatricopeptide repeat-containing protein At4g38010 OS=Arabidopsis thaliana GN=PCMP-E45 PE=3 SV=1//9.15898e-13
Chr4	24496695	24496890	196	Promoter (<=1kb)	24497616	24505401	7786	+	LOC_Os04g41280	-726	sp|Q12955|ANK3_HUMAN Ankyrin-3 OS=Homo sapiens GN=ANK3 PE=1 SV=3//7.30721e-07
Chr4	24860984	24861190	207	Promoter (1-2kb)	24858040	24859661	1622	-	LOC_Os04g41960	-1323	sp|Q9SLN8|DBR_TOBAC 2-alkenal reductase (NADP(+)-dependent) OS=Nicotiana tabacum GN=DBR PE=1 SV=1//2.1622e-166
Chr4	24861704	24861899	196	Promoter (2-3kb)	24858040	24859661	1622	-	LOC_Os04g41960	-2043	sp|Q9SLN8|DBR_TOBAC 2-alkenal reductase (NADP(+)-dependent) OS=Nicotiana tabacum GN=DBR PE=1 SV=1//2.1622e-166
Chr4	24890145	24890626	482	Promoter (<=1kb)	24889983	24891487	1505	+	LOC_Os04g42020	162	sp|Q9SK53|COL3_ARATH Zinc finger protein CONSTANS-LIKE 3 OS=Arabidopsis thaliana GN=COL3 PE=1 SV=1//4.77591e-43
Chr4	24952787	24953488	702	Promoter (<=1kb)	24946091	24952282	6192	-	LOC_Os04g42140	-505	sp|Q84PB3|IF4G1_ORYSJ Eukaryotic translation initiation factor isoform 4G-1 OS=Oryza sativa subsp. japonica GN=Os04g0499300 PE=2 SV=2//0
Chr4	25095760	25095955	196	Distal Intergenic	25102101	25107672	5572	+	LOC_Os04g42420	-6146	sp|F4I9E1|NFD4_ARATH Protein NUCLEAR FUSION DEFECTIVE 4 OS=Arabidopsis thaliana GN=NFD4 PE=3 SV=1//1.92847e-18
Chr4	25188006	25188201	196	Promoter (<=1kb)	25187851	25192745	4895	+	LOC_Os04g42580	155	sp|Q0QLE4|DML_EUBBA 2,3-dimethylmalate lyase OS=Eubacterium barkeri GN=Dml PE=1 SV=1//1.71177e-67
Chr4	25374422	25374617	196	Promoter (<=1kb)	25372491	25374576	2086	-	LOC_Os04g42870	0	sp|Q3ED65|MENG_ARATH 2-phytyl-1,4-beta-naphthoquinone methyltransferase, chloroplastic OS=Arabidopsis thaliana GN=MENG PE=1 SV=2//3.23189e-100
Chr4	25517347	25517562	216	Promoter (1-2kb)	25518248	25518789	542	-	LOC_Os04g43090	1227	sp|B7EIH2|Y3643_ORYSJ B3 domain-containing protein Os03g0164300 OS=Oryza sativa subsp. japonica GN=Os03g0164300 PE=3 SV=1//3.13493e-07
Chr4	25518536	25518731	196	Promoter (<=1kb)	25518248	25518789	542	-	LOC_Os04g43090	58	sp|B7EIH2|Y3643_ORYSJ B3 domain-containing protein Os03g0164300 OS=Oryza sativa subsp. japonica GN=Os03g0164300 PE=3 SV=1//3.13493e-07
Chr4	25652182	25652377	196	Promoter (<=1kb)	25650132	25652646	2515	-	LOC_Os04g43380	269	sp|Q7XPY5|BGL15_ORYSJ Putative beta-glucosidase 15 OS=Oryza sativa subsp. japonica GN=BGLU15 PE=5 SV=2//0
Chr4	25653141	25653646	506	Promoter (<=1kb)	25650132	25652646	2515	-	LOC_Os04g43380	-495	sp|Q7XPY5|BGL15_ORYSJ Putative beta-glucosidase 15 OS=Oryza sativa subsp. japonica GN=BGLU15 PE=5 SV=2//0
Chr4	25668801	25669044	244	Distal Intergenic	25672571	25674982	2412	+	LOC_Os04g43400	-3527	sp|Q7XSK1|BGL17_ORYSJ Putative beta-glucosidase 17 OS=Oryza sativa subsp. japonica GN=BGLU17 PE=5 SV=3//0
Chr4	25860231	25860600	370	Promoter (<=1kb)	25860364	25865216	4853	+	LOC_Os04g43700	0	sp|Q8GWB7|GUX6_ARATH Inositol phosphorylceramide glucuronosyltransferase 1 OS=Arabidopsis thaliana GN=IPUT1 PE=1 SV=1//4.369e-114
Chr4	25910195	25910357	162	promoter（<=2kb）	25906878	25910059	3182	-	LOC_Os04g43760	-36	sp|PREDICTED: phenylalanine ammonia-lyase-like [Oryza sativa Japonica Group]
Chr4	26070071	26070266	196	Promoter (<=1kb)	26064583	26070544	5962	-	LOC_Os04g43980	278	sp|Q5RBK0|GIN1_PONAB Gypsy retrotransposon integrase-like protein 1 OS=Pongo abelii GN=GIN1 PE=2 SV=1//1.21769e-19
Chr4	26208286	26208487	202	Promoter (<=1kb)	26206039	26207903	1865	-	LOC_Os04g44240	-383	sp|Q9SCP6|U73D1_ARATH UDP-glycosyltransferase 73D1 OS=Arabidopsis thaliana GN=UGT73D1 PE=3 SV=1//3.80241e-98
Chr4	26217446	26217936	491	Promoter (<=1kb)	26218187	26218732	546	+	LOC_Os04g44260	-251	sp|Q6ZFU6|NTRB_ORYSJ Thioredoxin reductase NTRB OS=Oryza sativa subsp. japonica GN=NTRB PE=2 SV=1//1.20634e-38
Chr4	26240373	26240568	196	Promoter (<=1kb)	26236216	26240651	4436	-	LOC_Os04g44300	83	sp|Q7XKF4|YSL13_ORYSJ Probable metal-nicotianamine transporter YSL13 OS=Oryza sativa subsp. japonica GN=YSL13 PE=2 SV=2//0
Chr4	26757970	26758273	304	Promoter (<=1kb)	26754330	26757287	2958	-	LOC_Os04g45280	-683	sp|Q28BZ2|HINT3_XENTR Histidine triad nucleotide-binding protein 3 OS=Xenopus tropicalis GN=hint3 PE=2 SV=1//7.44373e-17
Chr4	27158044	27158274	231	Promoter (<=1kb)	27154339	27158799	4461	-	LOC_Os04g45860	525	sp|Q7XUJ2|YSL9_ORYSJ Probable metal-nicotianamine transporter YSL9 OS=Oryza sativa subsp. japonica GN=YSL9 PE=2 SV=2//0
Chr4	27328816	27329026	211	Promoter (<=1kb)	27328770	27329428	659	-	LOC_Os04g46120	402	sp|Q96316|BCB3_ARATH Uclacyanin-3 OS=Arabidopsis thaliana GN=UCC3 PE=2 SV=1//2.39314e-22
Chr4	27372232	27372442	211	Promoter (1-2kb)	27370862	27373629	2768	-	LOC_Os04g46220	1187	sp|Q40479|ERF2_TOBAC Ethylene-responsive transcription factor 2 OS=Nicotiana tabacum GN=ERF2 PE=2 SV=1//2.17473e-28
Chr4	27421990	27422244	255	Promoter (<=1kb)	27420214	27422389	2176	-	LOC_Os04g46270	145	sp|Q9SJB4|GDL34_ARATH GDSL esterase/lipase At2g04570 OS=Arabidopsis thaliana GN=At2g04570 PE=2 SV=1//3.43878e-15
Chr4	27585749	27585944	196	Promoter (<=1kb)	27585421	27588120	2700	+	LOC_Os04g46510	328	sp|P23074|POL_SFV1 Pro-Pol polyprotein OS=Simian foamy virus type 1 GN=pol PE=1 SV=3//1.57826e-21
Chr4	27899823	27900084	262	Distal Intergenic	27881155	27890773	9619	-	LOC_Os04g47040	-9050	sp|P13027|ARRS_MAIZE Anthocyanin regulatory R-S protein OS=Zea mays GN=R-S PE=2 SV=1//2.09407e-166
Chr4	28142495	28142711	217	Promoter (<=1kb)	28143006	28144300	1295	+	LOC_Os04g47430	-295	sp|Q6AZB8|HARB1_DANRE Putative nuclease HARBI1 OS=Danio rerio GN=harbi1 PE=2 SV=1//5.83585e-12
Chr4	28196459	28196779	321	Promoter (<=1kb)	28192112	28196154	4043	-	LOC_Os04g47530	-305	sp|F4JTN2|LAZ1_ARATH Protein LAZ1 OS=Arabidopsis thaliana GN=LAZ1 PE=1 SV=1//8.94992e-27
Chr4	28994698	28994893	196	Distal Intergenic	28981827	28988472	6646	-	LOC_Os04g48640	-6226	sp|P0CT39|TF26_SCHPO Transposon Tf2-6 polyprotein OS=Schizosaccharomyces pombe (strain 972 / ATCC 24843) GN=Tf2-6 PE=3 SV=1//3.28917e-127
Chr4	29129074	29129289	216	Promoter (2-3kb)	29124518	29126984	2467	-	LOC_Os04g48840	-2090	sp|Q8LPG1|FAX4_ARATH Protein FATTY ACID EXPORT 4, chloroplastic OS=Arabidopsis thaliana GN=FAX4 PE=2 SV=1//2.07879e-20
Chr4	29157335	29157657	323	Promoter (<=1kb)	29157213	29159281	2069	+	LOC_Os04g48880	122	sp|B3SGL0|BCH_GENLU Beta-carotene 3-hydroxylase, chloroplastic OS=Gentiana lutea GN=BHY PE=2 SV=1//1.88223e-113
Chr4	29184626	29184935	310	Promoter (2-3kb)	29187055	29192927	5873	+	LOC_Os04g48940	-2120	sp|Q8VZL4|MSL1_ARATH Mechanosensitive ion channel protein 1, mitochondrial OS=Arabidopsis thaliana GN=MSL1 PE=2 SV=1//6.57316e-143
Chr4	29424856	29425177	322	Promoter (<=1kb)	29423955	29428509	4555	+	LOC_Os04g49300	901	sp|P14381|YTX2_XENLA Transposon TX1 uncharacterized 149 kDa protein OS=Xenopus laevis PE=3 SV=1//4.28119e-42
Chr4	29445396	29445591	196	Distal Intergenic	29437897	29441912	4016	-	LOC_Os04g49320	-3484	sp|B6SFA4|MAA3_ARATH Probable helicase MAGATAMA 3 OS=Arabidopsis thaliana GN=MAA3 PE=2 SV=1//1.63306e-35
Chr4	29552480	29553028	549	Promoter (<=1kb)	29551989	29553107	1119	-	LOC_Os04g49550	79	sp|O22755|ATL44_ARATH RING-H2 finger protein ATL44 OS=Arabidopsis thaliana GN=ATL44 PE=2 SV=1//2.417e-22
Chr4	29581739	29581934	196	Promoter (<=1kb)	29577953	29581134	3182	-	LOC_Os04g49590	-605	sp|P0C042|Y4597_ARATH Uncharacterized protein At4g15970 OS=Arabidopsis thaliana GN=At4g15970 PE=2 SV=1//5.01825e-94
Chr4	29664003	29664288	286	Promoter (1-2kb)	29666140	29672631	6492	+	LOC_Os04g49757	-1852	sp|O49726|PUP9_ARATH Probable purine permease 9 OS=Arabidopsis thaliana GN=PUP9 PE=2 SV=2//2.56127e-80
Chr4	29667049	29667301	253	Promoter (<=1kb)	29666140	29672631	6492	+	LOC_Os04g49757	909	sp|O49726|PUP9_ARATH Probable purine permease 9 OS=Arabidopsis thaliana GN=PUP9 PE=2 SV=2//2.56127e-80
Chr4	29863500	29863714	215	Promoter (<=1kb)	29863255	29863836	582	+	LOC_Os04g50070	245	sp|Q38895|SUP_ARATH Transcriptional regulator SUPERMAN OS=Arabidopsis thaliana GN=SUP PE=1 SV=1//6.59175e-18
Chr4	30070010	30070205	196	Promoter (<=1kb)	30066294	30069863	3570	-	LOC_Os04g50830	-147	sp|P14381|YTX2_XENLA Transposon TX1 uncharacterized 149 kDa protein OS=Xenopus laevis PE=3 SV=1//5.02701e-50
Chr4	30325093	30325327	235	Distal Intergenic	30317725	30321649	3925	-	LOC_Os04g51190	-3444	sp|Q6AWY6|GRF3_ORYSJ Growth-regulating factor 3 OS=Oryza sativa subsp. japonica GN=GRF3 PE=3 SV=2//0
Chr4	30377231	30377426	196	Promoter (<=1kb)	30377262	30379530	2269	+	LOC_Os04g51280	0	sp|O22793|MORF2_ARATH Multiple organellar RNA editing factor 2, chloroplastic OS=Arabidopsis thaliana GN=MORF2 PE=1 SV=1//3.56465e-104
Chr4	30390298	30390516	219	Promoter (<=1kb)	30387880	30390729	2850	-	LOC_Os04g51310	213	sp|Q9I6J0|SPUE_PSEAE Spermidine-binding periplasmic protein SpuE OS=Pseudomonas aeruginosa (strain ATCC 15692 / PAO1 / 1C / PRS 101 / LMG 12228) GN=spuE PE=1 SV=1//2.37233e-19
Chr4	30395607	30395802	196	Promoter (<=1kb)	30393182	30395776	2595	-	LOC_Os04g51320	0	sp|O80450|TGT3B_ARATH Trihelix transcription factor GT-3b OS=Arabidopsis thaliana GN=GT-3B PE=1 SV=1//1.21332e-24
Chr4	30415470	30415712	243	Promoter (<=1kb)	30413784	30415688	1905	-	LOC_Os04g51360	0	sp|Q07G10|ALKB8_XENTR Alkylated DNA repair protein alkB homolog 8 OS=Xenopus tropicalis GN=alkbh8 PE=2 SV=2//5.06924e-38
Chr4	30455835	30456033	199	Promoter (<=1kb)	30454467	30455664	1198	-	LOC_Os04g51420	-171	sp|Q8GXG1|ASPGB_ARATH Probable isoaspartyl peptidase/L-asparaginase 2 OS=Arabidopsis thaliana GN=At3g16150 PE=2 SV=2//1.28038e-50
Chr4	30535897	30536092	196	Promoter (<=1kb)	30530155	30536309	6155	-	LOC_Os04g51540	217	sp|Q7LHG5|YI31B_YEAST Transposon Ty3-I Gag-Pol polyprotein OS=Saccharomyces cerevisiae (strain ATCC 204508 / S288c) GN=TY3B-I PE=3 SV=2//1.85636e-09
Chr4	30870894	30871089	196	Promoter (1-2kb)	30869666	30871743	2078	+	LOC_Os04g51990	1228	sp|Q94CD1|HHT1_ARATH Omega-hydroxypalmitate O-feruloyl transferase OS=Arabidopsis thaliana GN=HHT1 PE=1 SV=1//6.90929e-10
Chr4	31061738	31061979	242	Promoter (<=1kb)	31061682	31062703	1022	+	LOC_Os04g52260	56	sp|P14009|14KD_DAUCA 14 kDa proline-rich protein DC2.15 OS=Daucus carota PE=2 SV=1//1.05208e-12
Chr4	31075957	31076236	280	Promoter (<=1kb)	31073380	31076344	2965	-	LOC_Os04g52290	108	sp|Q9SAK0|PP132_ARATH Pentatricopeptide repeat-containing protein At1g79490, mitochondrial OS=Arabidopsis thaliana GN=EMB2217 PE=2 SV=1//0
Chr4	31225174	31225369	196	Promoter (<=1kb)	31223396	31224544	1149	-	LOC_Os04g52510	-630	sp|Q2V6J9|UFOG7_FRAAN UDP-glucose flavonoid 3-O-glucosyltransferase 7 OS=Fragaria ananassa GN=GT7 PE=1 SV=1//5.86584e-09
Chr4	31239415	31239711	297	Promoter (<=1kb)	31239185	31243433	4249	+	LOC_Os04g52540	230	sp|Q7XTS4|AGO2_ORYSJ Protein argonaute 2 OS=Oryza sativa subsp. japonica GN=AGO2 PE=2 SV=2//0
Chr4	31700971	31701223	253	Promoter (<=1kb)	31700907	31703617	2711	+	LOC_Os04g53230	64	sp|P54260|GCST_SOLTU Aminomethyltransferase, mitochondrial OS=Solanum tuberosum GN=GDCST PE=2 SV=1//0
Chr4	31928575	31928785	211	Promoter (<=1kb)	31925655	31928596	2942	-	LOC_Os04g53550	0	sp|Q9C8T1|AB1I_ARATH ABC transporter I family member 1 OS=Arabidopsis thaliana GN=ABCI1 PE=2 SV=1//3.54623e-113
Chr4	31961846	31962180	335	Promoter (<=1kb)	31959526	31961876	2351	-	LOC_Os04g53612	0	sp|Q9LSZ0|APO4_ARATH APO protein 4, mitochondrial OS=Arabidopsis thaliana GN=APO4 PE=2 SV=2//8.60254e-112
Chr4	31996561	31996756	196	Promoter (1-2kb)	31995412	31998446	3035	+	LOC_Os04g53680	1149	sp|Q0J9W0|CCP11_ORYSJ Cyclin-P1-1 OS=Oryza sativa subsp. japonica GN=CYCP1-1 PE=3 SV=2//6.72413e-99
Chr4	32017775	32018017	243	Promoter (<=1kb)	32017655	32018402	748	-	LOC_Os04g53730	385	sp|Q0J9V6|Y4294_ORYSJ Uncharacterized protein Os04g0629400 OS=Oryza sativa subsp. japonica GN=Os04g0629400 PE=2 SV=2//2.43055e-41
Chr4	32042543	32042787	245	Promoter (<=1kb)	32043533	32048708	5176	+	LOC_Os04g53770	-746	sp|A7S6A5|SDA1_NEMVE Protein SDA1 homolog OS=Nematostella vectensis GN=sdad1 PE=3 SV=1//5.41956e-99
Chr4	32137544	32137790	247	Promoter (<=1kb)	32137818	32141183	3366	+	LOC_Os04g53930	-28	sp|Q9LHQ6|OCT4_ARATH Organic cation/carnitine transporter 4 OS=Arabidopsis thaliana GN=OCT4 PE=2 SV=1//4.52065e-122
Chr4	32177872	32178097	226	Promoter (<=1kb)	32173554	32177365	3812	-	LOC_Os04g53994	-507	sp|O81906|B120_ARATH G-type lectin S-receptor-like serine/threonine-protein kinase B120 OS=Arabidopsis thaliana GN=B120 PE=2 SV=1//0
Chr4	32465582	32465797	216	Promoter (<=1kb)	32464933	32466074	1142	+	LOC_Os04g54600	649	sp|O22227|MIZ1_ARATH Protein MIZU-KUSSEI 1 OS=Arabidopsis thaliana GN=MIZ1 PE=1 SV=1//3.43825e-28
Chr4	32516641	32516836	196	Promoter (<=1kb)	32517267	32522157	4891	+	LOC_Os04g54660	-431	sp|P23074|POL_SFV1 Pro-Pol polyprotein OS=Simian foamy virus type 1 GN=pol PE=1 SV=3//2.29022e-21
Chr4	33072058	33072297	240	Promoter (<=1kb)	33071636	33075371	3736	+	LOC_Os04g55560	422	sp|P47927|AP2_ARATH Floral homeotic protein APETALA 2 OS=Arabidopsis thaliana GN=AP2 PE=1 SV=1//1.45413e-82
Chr4	33074276	33074487	212	Promoter (<=1kb)	33073342	33075371	2030	+	LOC_Os04g55560	934	sp|P47927|AP2_ARATH Floral homeotic protein APETALA 2 OS=Arabidopsis thaliana GN=AP2 PE=1 SV=1//1.45413e-82
Chr4	33145440	33145874	435	Promoter (1-2kb)	33145372	33147203	1832	-	LOC_Os04g55680	1329	sp|Q9C9B0|U89B1_ARATH UDP-glycosyltransferase 89B1 OS=Arabidopsis thaliana GN=UGT89B1 PE=2 SV=2//6.26388e-95
Chr4	33167188	33167383	196	Promoter (<=1kb)	33167061	33169943	2883	+	LOC_Os04g55720	127	sp|O49485|SERA1_ARATH D-3-phosphoglycerate dehydrogenase 1, chloroplastic OS=Arabidopsis thaliana GN=PGDH1 PE=1 SV=1//3.9236e-32
Chr4	33187247	33187489	243	Promoter (1-2kb)	33185813	33186889	1077	+	LOC_Os04g55750	1434	sp|Q9LMP1|WAK2_ARATH Wall-associated receptor kinase 2 OS=Arabidopsis thaliana GN=WAK2 PE=1 SV=1//4.47664e-13
Chr4	33739521	33739913	393	Promoter (<=1kb)	33735143	33739411	4269	-	LOC_Os04g56580	-110	sp|Q7XQZ6|IPK1_ORYSJ Inositol-pentakisphosphate 2-kinase IPK1 OS=Oryza sativa subsp. japonica GN=IPK1 PE=2 SV=1//0
Chr4	33760437	33760690	254	Promoter (<=1kb)	33761378	33764576	3199	+	LOC_Os04g56620	-688	sp|Q39054|CNX1_ARATH Molybdopterin biosynthesis protein CNX1 OS=Arabidopsis thaliana GN=CNX1 PE=1 SV=2//5.25276e-37
Chr4	33790144	33790339	196	Promoter (<=1kb)	33789435	33790386	952	-	LOC_Os04g56680	47	sp|P32295|ARG7_VIGRR Indole-3-acetic acid-induced protein ARG7 OS=Vigna radiata var. radiata GN=ARG7 PE=2 SV=1//1.39105e-09
Chr4	34083595	34083893	299	Promoter (<=1kb)	34083436	34087586	4151	+	LOC_Os04g57210	159	sp|Q7XR80|ARP8_ORYSJ Actin-related protein 8 OS=Oryza sativa subsp. japonica GN=ARP8 PE=2 SV=1//2.81961e-107
Chr4	34126663	34127123	461	Promoter (<=1kb)	34122822	34125935	3114	-	LOC_Os04g57320	-728	sp|Q56X52|AOX4_ARATH Ubiquinol oxidase 4, chloroplastic/chromoplastic OS=Arabidopsis thaliana GN=AOX4 PE=1 SV=2//3.83809e-117
Chr4	34133882	34134302	421	Promoter (<=1kb)	34133866	34134438	573	-	LOC_Os04g57340	136	sp|Q9LDE4|ERF83_ARATH Ethylene-responsive transcription factor 7 OS=Arabidopsis thaliana GN=ERF7 PE=1 SV=1//8.21071e-19
Chr4	34150479	34150689	211	Promoter (<=1kb)	34148081	34150717	2637	-	LOC_Os04g57370	28	sp|Q0J969|CAEH1_ORYSJ Probable carboxylesterase Os04g0669500 OS=Oryza sativa subsp. japonica GN=Os04g0669500 PE=3 SV=1//2.40945e-156
Chr4	34209398	34209593	196	Promoter (<=1kb)	34209234	34211093	1860	+	LOC_Os04g57500	164	sp|Q7XR51|PHYK1_ORYSJ Probable phytol kinase 1, chloroplastic OS=Oryza sativa subsp. japonica GN=Os04g0670700 PE=2 SV=1//8.56967e-151
Chr4	34238586	34238882	297	Promoter (<=1kb)	34236403	34238859	2457	-	LOC_Os04g57540	0	sp|Q7XR47|KAD6_ORYSJ Probable adenylate kinase 6, chloroplastic OS=Oryza sativa subsp. japonica GN=Os04g0671100 PE=3 SV=1//4.67149e-23
Chr4	34366903	34367112	210	Distal Intergenic	34375978	34377357	1380	+	LOC_Os04g57720	-8866	sp|Q9ZWS6|ARR6_ARATH Two-component response regulator ARR6 OS=Arabidopsis thaliana GN=ARR6 PE=1 SV=2//1.38634e-42
Chr4	34496286	34496481	196	Promoter (<=1kb)	34491382	34496539	5158	-	LOC_Os04g57890	58	sp|Q7XQ88|STT3B_ORYSJ Dolichyl-diphosphooligosaccharide--protein glycosyltransferase subunit STT3B OS=Oryza sativa subsp. japonica GN=STT3B PE=2 SV=2//0
Chr4	34513548	34513937	390	Promoter (<=1kb)	34513582	34515350	1769	+	LOC_Os04g57930	0	sp|Q7XKD0|TRXX_ORYSJ Thioredoxin X, chloroplastic OS=Oryza sativa subsp. japonica GN=TRX-X PE=2 SV=1//2.1898e-93
Chr4	34566932	34567225	294	Promoter (<=1kb)	34566792	34570003	3212	+	LOC_Os04g58040	140	sp|Q75L84|GT51_ORYSJ Probable glucuronosyltransferase Os05g0123100 OS=Oryza sativa subsp. japonica GN=Os05g0123100 PE=2 SV=1//4.50119e-13
Chr4	34587139	34587433	295	Promoter (<=1kb)	34586366	34588232	1867	-	LOC_Os04g58070	799	sp|Q9LHE3|ASPG2_ARATH Protein ASPARTIC PROTEASE IN GUARD CELL 2 OS=Arabidopsis thaliana GN=ASPG2 PE=2 SV=1//1.71557e-98
Chr5	538253	538557	305	Promoter (<=1kb)	537846	539668	1823	+	LOC_Os05g01940	407	sp|P0CH30|RING1_GOSHI E3 ubiquitin-protein ligase RING1 OS=Gossypium hirsutum GN=RING1 PE=1 SV=1//2.59407e-29
Chr5	612497	612705	209	Promoter (<=1kb)	612964	619232	6269	+	LOC_Os05g02080	-259	sp|Q65XV7|RFA1C_ORYSJ Replication protein A 70 kDa DNA-binding subunit C OS=Oryza sativa subsp. japonica GN=RPA1C PE=1 SV=1//1.0501e-18
Chr5	612926	613229	304	Promoter (<=1kb)	612964	619232	6269	+	LOC_Os05g02080	0	sp|Q65XV7|RFA1C_ORYSJ Replication protein A 70 kDa DNA-binding subunit C OS=Oryza sativa subsp. japonica GN=RPA1C PE=1 SV=1//1.0501e-18
Chr5	649075	649270	196	Promoter (1-2kb)	648654	650677	2024	-	LOC_Os05g02140	1407	sp|Q8S9J8|CAP1_ARATH Probable clathrin assembly protein At4g32285 OS=Arabidopsis thaliana GN=At4g32285 PE=1 SV=2//2.22371e-145
Chr5	737291	737683	393	Promoter (<=1kb)	738204	739079	876	+	LOC_Os05g02300	-521	sp|Q75L11|H2A6_ORYSJ Probable histone H2A.6 OS=Oryza sativa subsp. japonica GN=Os05g0113900 PE=2 SV=2//7.40435e-56
Chr5	955212	955407	196	Promoter (<=1kb)	956022	957051	1030	+	LOC_Os05g02690	-615	sp|Q8GWZ6|SRR1_ARATH Protein SENSITIVITY TO RED LIGHT REDUCED 1 OS=Arabidopsis thaliana GN=SRR1 PE=2 SV=2//2.76924e-20
Chr5	1092785	1092980	196	Promoter (<=1kb)	1092428	1097362	4935	+	LOC_Os05g02950	357	sp|Q7LHG5|YI31B_YEAST Transposon Ty3-I Gag-Pol polyprotein OS=Saccharomyces cerevisiae (strain ATCC 204508 / S288c) GN=TY3B-I PE=3 SV=2//5.96616e-11
Chr5	1140782	1141505	724	Promoter (<=1kb)	1142027	1145752	3726	+	LOC_Os05g03020	-522	sp|Q8VHT8|TF3A_RAT Transcription factor IIIA OS=Rattus norvegicus GN=Gtf3a PE=2 SV=2//6.98277e-09
Chr5	1167434	1167629	196	Distal Intergenic	1155968	1160267	4300	-	LOC_Os05g03040	-7167	sp|P47927|AP2_ARATH Floral homeotic protein APETALA 2 OS=Arabidopsis thaliana GN=AP2 PE=1 SV=1//7.59743e-07
Chr5	1200597	1200900	304	Promoter (<=1kb)	1198628	1201047	2420	-	LOC_Os05g03070	147	sp|Q5XF09|PT311_ARATH Probable sugar phosphate/phosphate translocator At3g11320 OS=Arabidopsis thaliana GN=At3g11320 PE=2 SV=1//4.24394e-133
Chr5	1279794	1279989	196	Promoter (<=1kb)	1278891	1285604	6714	+	LOC_Os05g03174	903	sp|Q75L84|GT51_ORYSJ Probable glucuronosyltransferase Os05g0123100 OS=Oryza sativa subsp. japonica GN=Os05g0123100 PE=2 SV=1//0
Chr5	1455755	1455950	196	Promoter (1-2kb)	1454720	1457320	2601	+	LOC_Os05g03450	1035	sp|Q9LFH9|LRK81_ARATH L-type lectin-domain containing receptor kinase VIII.1 OS=Arabidopsis thaliana GN=LECRK81 PE=2 SV=1//3.52997e-56
Chr5	1523891	1524195	305	Promoter (<=1kb)	1523847	1529707	5861	+	LOC_Os05g03600	44	sp|P10978|POLX_TOBAC Retrovirus-related Pol polyprotein from transposon TNT 1-94 OS=Nicotiana tabacum PE=2 SV=1//1.13954e-07
Chr5	1548626	1548821	196	Promoter (1-2kb)	1547433	1550163	2731	+	LOC_Os05g03620	1193	sp|Q9LY50|ACCR3_ARATH Putative serine/threonine-protein kinase-like protein CCR3 OS=Arabidopsis thaliana GN=CCR3 PE=2 SV=1//7.44902e-161
Chr5	1596731	1597045	315	Promoter (<=1kb)	1589426	1596093	6668	-	LOC_Os05g03670	-638	sp|P0CT39|TF26_SCHPO Transposon Tf2-6 polyprotein OS=Schizosaccharomyces pombe (strain 972 / ATCC 24843) GN=Tf2-6 PE=3 SV=1//3.578e-148
Chr5	1662279	1662656	378	Promoter (<=1kb)	1662021	1664438	2418	+	LOC_Os05g03760	258	sp|Q688R3|C3H33_ORYSJ Zinc finger CCCH domain-containing protein 33 OS=Oryza sativa subsp. japonica GN=Os05g0128200 PE=2 SV=1//0
Chr5	1663263	1663458	196	Promoter (1-2kb)	1662021	1664438	2418	+	LOC_Os05g03760	1242	sp|Q688R3|C3H33_ORYSJ Zinc finger CCCH domain-containing protein 33 OS=Oryza sativa subsp. japonica GN=Os05g0128200 PE=2 SV=1//0
Chr5	1705026	1705255	230	Promoter (<=1kb)	1704955	1707109	2155	+	LOC_Os05g03830	71	sp|O04866|ARGD_ALNGL Acetylornithine aminotransferase, mitochondrial OS=Alnus glutinosa GN=AG118 PE=2 SV=1//0
Chr5	1823512	1823707	196	Promoter (<=1kb)	1818037	1823988	5952	-	LOC_Os05g04040	281	sp|Q7LHG5|YI31B_YEAST Transposon Ty3-I Gag-Pol polyprotein OS=Saccharomyces cerevisiae (strain ATCC 204508 / S288c) GN=TY3B-I PE=3 SV=2//6.61095e-10
Chr5	1833598	1834019	422	Promoter (<=1kb)	1830739	1833326	2588	-	LOC_Os05g04070	-272	sp|Q7XA78|D27_ARATH Beta-carotene isomerase D27, chloroplastic OS=Arabidopsis thaliana GN=D27 PE=1 SV=1//9.03428e-27
Chr5	2132192	2132387	196	Promoter (<=1kb)	2129252	2132815	3564	-	LOC_Os05g04570	428	sp|O65451|FB333_ARATH Probable F-box protein At4g22030 OS=Arabidopsis thaliana GN=At4g22030 PE=4 SV=1//2.88857e-11
Chr5	2132824	2133019	196	Promoter (<=1kb)	2129252	2132815	3564	-	LOC_Os05g04570	-9	sp|O65451|FB333_ARATH Probable F-box protein At4g22030 OS=Arabidopsis thaliana GN=At4g22030 PE=4 SV=1//2.88857e-11
Chr5	2347464	2347954	491	Promoter (<=1kb)	2345388	2346843	1456	-	LOC_Os05g04870	-621	sp|Q75KH3|GRDH_ORYSJ Glucose and ribitol dehydrogenase homolog OS=Oryza sativa subsp. japonica GN=Os05g0140800 PE=2 SV=2//0
Chr5	2582061	2582751	691	Downstream (2-3kb)	2574216	2574773	558	-	LOC_Os05g05250	-7288	sp|P10978|POLX_TOBAC Retrovirus-related Pol polyprotein from transposon TNT 1-94 OS=Nicotiana tabacum PE=2 SV=1//5.3012e-53
Chr5	2609527	2609767	241	Promoter (<=1kb)	2609404	2614085	4682	+	LOC_Os05g05300	123	sp|Q9LHF5|VIL1_ARATH VIN3-like protein 1 OS=Arabidopsis thaliana GN=VIL1 PE=1 SV=1//6.51623e-27
Chr5	2831193	2831606	414	Promoter (<=1kb)	2830905	2833764	2860	+	LOC_Os05g05690	288	sp|Q8NBL1|PGLT1_HUMAN Protein O-glucosyltransferase 1 OS=Homo sapiens GN=POGLUT1 PE=1 SV=1//3.7267e-22
Chr5	2845786	2845981	196	Promoter (<=1kb)	2845666	2851659	5994	+	LOC_Os05g05710	120	sp|Q9FEE2|TON2_ARATH Probable serine/threonine-protein phosphatase 2A regulatory subunit B&apos;&apos; subunit TON2 OS=Arabidopsis thaliana GN=TON2 PE=1 SV=1//0
Chr5	2865375	2865694	320	Promoter (<=1kb)	2862676	2865765	3090	-	LOC_Os05g05740	71	sp|Q9Z2Y8|PROSC_MOUSE Proline synthase co-transcribed bacterial homolog protein OS=Mus musculus GN=Prosc PE=1 SV=1//8.2957e-68
Chr5	2898541	2898853	313	Promoter (<=1kb)	2892496	2899113	6618	-	LOC_Os05g05800	260	sp|Q0DKP3|TIR1A_ORYSJ Transport inhibitor response 1-like protein Os05g0150500 OS=Oryza sativa subsp. japonica GN=Os05g0150500 PE=2 SV=2//0
Chr5	2931415	2931704	290	Promoter (<=1kb)	2928122	2931982	3861	-	LOC_Os05g05840	278	sp|P93422|SYHC_ORYSJ Histidine--tRNA ligase, cytoplasmic OS=Oryza sativa subsp. japonica GN=Os05g0150900 PE=2 SV=2//0
Chr5	3042455	3042650	196	Promoter (<=1kb)	3042158	3043112	955	+	LOC_Os05g06080	297	sp|Q9C9M0|SINL4_ARATH E3 ubiquitin-protein ligase SINA-like 4 OS=Arabidopsis thaliana GN=At1g66650 PE=2 SV=1//8.33414e-09
Chr5	3203168	3203371	204	Promoter (<=1kb)	3203330	3214116	10787	+	LOC_Os05g06280	0	sp|Q940B8|KIN13_ARATH Kinesin-13A OS=Arabidopsis thaliana GN=KINESIN-13A PE=1 SV=1//0
Chr5	3269874	3270128	255	Promoter (<=1kb)	3270745	3276934	6190	+	LOC_Os05g06390	-617	sp|O00370|LORF2_HUMAN LINE-1 retrotransposable element ORF2 protein OS=Homo sapiens PE=1 SV=1//8.17659e-44
Chr5	3319515	3319714	200	Promoter (<=1kb)	3313391	3319717	6327	-	LOC_Os05g06460	3	sp|A8MS68|PLPD1_ARATH Dihydrolipoyl dehydrogenase 1, chloroplastic OS=Arabidopsis thaliana GN=LPD1 PE=2 SV=1//0
Chr5	3526733	3526975	243	Promoter (<=1kb)	3526717	3530425	3709	+	LOC_Os05g06750	16	sp|Q9M5K3|DLDH1_ARATH Dihydrolipoyl dehydrogenase 1, mitochondrial OS=Arabidopsis thaliana GN=LPD1 PE=1 SV=2//0
Chr5	3625818	3626032	215	Promoter (<=1kb)	3626394	3629132	2739	+	LOC_Os05g06920	-362	sp|Q6ATB2|CRSH2_ORYSJ Probable GTP diphosphokinase CRSH2, chloroplastic OS=Oryza sativa subsp. japonica GN=CRSH2 PE=2 SV=1//0
Chr5	3626596	3626952	357	Promoter (<=1kb)	3626394	3629132	2739	+	LOC_Os05g06920	202	sp|Q6ATB2|CRSH2_ORYSJ Probable GTP diphosphokinase CRSH2, chloroplastic OS=Oryza sativa subsp. japonica GN=CRSH2 PE=2 SV=1//0
Chr5	3716004	3716221	218	Promoter (<=1kb)	3715762	3716891	1130	-	LOC_Os05g07060	670	sp|Q8LEJ6|FLA11_ARATH Fasciclin-like arabinogalactan protein 11 OS=Arabidopsis thaliana GN=FLA11 PE=2 SV=2//3.21051e-58
Chr5	4113288	4113534	247	Distal Intergenic	4107109	4109880	2772	-	LOC_Os05g07650	-3408	sp|F4JRE0|TMN12_ARATH Transmembrane 9 superfamily member 12 OS=Arabidopsis thaliana GN=TMN12 PE=2 SV=1//0
Chr5	4223388	4223583	196	Promoter (1-2kb)	4222556	4224920	2365	-	LOC_Os05g07830	1337	sp|P0CS08|TRM61_CRYNJ tRNA (adenine(58)-N(1))-methyltransferase catalytic subunit TRM61 OS=Cryptococcus neoformans var. neoformans serotype D (strain JEC21 / ATCC MYA-565) GN=TRM61 PE=3 SV=1//1.55479e-18
Chr5	4240229	4240451	223	Promoter (<=1kb)	4230147	4239980	9834	-	LOC_Os05g07850	-249	sp|Q93ZS4|NIK3_ARATH Protein NSP-INTERACTING KINASE 3 OS=Arabidopsis thaliana GN=NIK3 PE=1 SV=1//1.3911e-176
Chr5	4627135	4627330	196	Promoter (<=1kb)	4626220	4628310	2091	-	LOC_Os05g08480	980	sp|Q9SCP6|U73D1_ARATH UDP-glycosyltransferase 73D1 OS=Arabidopsis thaliana GN=UGT73D1 PE=3 SV=1//1.97983e-89
Chr5	4627544	4627825	282	Promoter (<=1kb)	4626220	4628310	2091	-	LOC_Os05g08480	485	sp|Q9SCP6|U73D1_ARATH UDP-glycosyltransferase 73D1 OS=Arabidopsis thaliana GN=UGT73D1 PE=3 SV=1//1.97983e-89
Chr5	4653721	4654089	369	Promoter (<=1kb)	4653226	4658218	4993	+	LOC_Os05g08530	495	sp|Q9FMF5|RPT3_ARATH Root phototropism protein 3 OS=Arabidopsis thaliana GN=RPT3 PE=1 SV=2//1.15302e-20
Chr5	4662041	4662241	201	Promoter (<=1kb)	4660662	4662589	1928	-	LOC_Os05g08540	348	sp|Q3I409|G3O23_WHEAT Gibberellin 3-beta-dioxygenase 2-3 OS=Triticum aestivum GN=GA3ox2-3 PE=2 SV=1//2.96319e-122
Chr5	4736133	4736328	196	Promoter (<=1kb)	4735050	4737049	2000	-	LOC_Os05g08640	721	sp|Q8LL69|DBNBT_TAXCA 3&apos;-N-debenzoyl-2&apos;-deoxytaxol N-benzoyltransferase OS=Taxus canadensis GN=TAX10 PE=1 SV=1//1.16074e-49
Chr5	4791119	4791354	236	Promoter (<=1kb)	4790958	4791909	952	-	LOC_Os05g08740	555	sp|J9U5U9|DAD2_PETHY Probable strigolactone esterase DAD2 OS=Petunia hybrida GN=DAD2 PE=1 SV=1//4.26856e-38
Chr5	4799326	4799521	196	Promoter (1-2kb)	4799111	4800891	1781	-	LOC_Os05g08750	1370	sp|F8WKW0|UGT1_GARJA Crocetin glucosyltransferase, chloroplastic OS=Gardenia jasminoides GN=UGT75L6 PE=1 SV=1//3.53277e-74
Chr5	4802931	4803221	291	Promoter (2-3kb)	4799111	4800891	1781	-	LOC_Os05g08750	-2040	sp|F8WKW0|UGT1_GARJA Crocetin glucosyltransferase, chloroplastic OS=Gardenia jasminoides GN=UGT75L6 PE=1 SV=1//3.53277e-74
Chr5	4885376	4885571	196	Promoter (<=1kb)	4885395	4888011	2617	+	LOC_Os05g08850	0	sp|Q9FVS9|C96AF_ARATH Alkane hydroxylase MAH1 OS=Arabidopsis thaliana GN=CYP96A15 PE=2 SV=1//6.10871e-98
Chr5	5266209	5266450	242	Promoter (<=1kb)	5266936	5270777	3842	+	LOC_Os05g09380	-486	sp|Q9LI74|CHUP1_ARATH Protein CHUP1, chloroplastic OS=Arabidopsis thaliana GN=CHUP1 PE=1 SV=1//2.57263e-44
Chr5	5640745	5641099	355	Promoter (<=1kb)	5638522	5641118	2597	-	LOC_Os05g10330	19	sp|P15490|VSPA_SOYBN Stem 28 kDa glycoprotein OS=Glycine max GN=VSPA PE=2 SV=1//2.07092e-39
Chr5	5954742	5954937	196	Promoter (1-2kb)	5954551	5956246	1696	-	LOC_Os05g10780	1309	sp|Q9STR4|1A17_ARATH 1-aminocyclopropane-1-carboxylate synthase 7 OS=Arabidopsis thaliana GN=ACS7 PE=1 SV=1//0
Chr5	5971988	5972183	196	Promoter (<=1kb)	5971934	5978733	6800	+	LOC_Os05g10810	54	sp|Q9SLD2|DGAT1_ARATH Diacylglycerol O-acyltransferase 1 OS=Arabidopsis thaliana GN=DGAT1 PE=1 SV=2//0
Chr5	6033697	6033942	246	Promoter (<=1kb)	6034198	6039237	5040	+	LOC_Os05g10890	-256	sp|P04146|COPIA_DROME Copia protein OS=Drosophila melanogaster GN=GIP PE=1 SV=3//2.9302e-132
Chr5	6257550	6257786	237	Promoter (<=1kb)	6255252	6257922	2671	-	LOC_Os05g11120	136	sp|Q9C889|PR1F2_ARATH PRA1 family protein F2 OS=Arabidopsis thaliana GN=PRA1F2 PE=1 SV=1//1.21556e-27
Chr5	6316654	6316920	267	Promoter (<=1kb)	6316889	6318955	2067	+	LOC_Os05g11190	0	sp|Q682S0|RPT2_ARATH Root phototropism protein 2 OS=Arabidopsis thaliana GN=RPT2 PE=1 SV=2//8.83583e-11
Chr5	6406051	6406348	298	Promoter (<=1kb)	6405567	6406491	925	-	LOC_Os05g11330	143	sp|Q8L9P8|RLF33_ARATH Protein RALF-like 33 OS=Arabidopsis thaliana GN=RALFL33 PE=2 SV=1//1.35253e-10
Chr5	6543517	6543712	196	Promoter (<=1kb)	6539817	6544643	4827	-	LOC_Os05g11560	931	sp|Q0DK16|NIP13_ORYSJ Aquaporin NIP1-3 OS=Oryza sativa subsp. japonica GN=NIP1-3 PE=3 SV=2//0
Chr5	6726823	6727123	301	Promoter (<=1kb)	6720998	6726973	5976	-	LOC_Os05g11810	0	sp|Q9SQ80|G2OX1_PEA Gibberellin 2-beta-dioxygenase 1 OS=Pisum sativum GN=GA2OX1 PE=1 SV=1//8.41884e-11
Chr5	6939521	6939790	270	Promoter (<=1kb)	6936859	6939771	2913	-	LOC_Os05g12140	0	sp|Q8YA32|INLI_LISMO Internalin-I OS=Listeria monocytogenes serovar 1/2a (strain ATCC BAA-679 / EGD-e) GN=inlI PE=3 SV=1//8.51066e-11
Chr5	7054155	7054381	227	Promoter (1-2kb)	7055864	7060018	4155	+	LOC_Os05g12290	-1483	sp|P04146|COPIA_DROME Copia protein OS=Drosophila melanogaster GN=GIP PE=1 SV=3//1.93574e-36
Chr5	7055063	7055258	196	Promoter (<=1kb)	7055864	7060018	4155	+	LOC_Os05g12290	-606	sp|P04146|COPIA_DROME Copia protein OS=Drosophila melanogaster GN=GIP PE=1 SV=3//1.93574e-36
Chr5	7152635	7152830	196	Promoter (<=1kb)	7152331	7153942	1612	+	LOC_Os05g12450	304	sp|Q9AR73|HQGT_RAUSE Hydroquinone glucosyltransferase OS=Rauvolfia serpentina GN=AS PE=1 SV=1//7.32105e-92
Chr5	7218473	7218874	402	Promoter (1-2kb)	7219557	7219895	339	-	LOC_Os05g12580	1021	sp|O82337|AGP16_ARATH Arabinogalactan peptide 16 OS=Arabidopsis thaliana GN=AGP16 PE=1 SV=1//2.75998e-16
Chr5	7222095	7222357	263	Promoter (2-3kb)	7219557	7219895	339	-	LOC_Os05g12580	-2200	sp|O82337|AGP16_ARATH Arabinogalactan peptide 16 OS=Arabidopsis thaliana GN=AGP16 PE=1 SV=1//2.75998e-16
Chr5	7284158	7284437	280	Promoter (<=1kb)	7279332	7284670	5339	-	LOC_Os05g12680	233	sp|Q9LV48|PERK1_ARATH Proline-rich receptor-like protein kinase PERK1 OS=Arabidopsis thaliana GN=PERK1 PE=2 SV=1//0
Chr5	7551528	7551923	396	Promoter (<=1kb)	7552496	7553896	1401	+	LOC_Os05g13620	-573	sp|P49311|GRP2_SINAL Glycine-rich RNA-binding protein GRP2A OS=Sinapis alba PE=2 SV=1//2.79407e-23
Chr5	8006129	8006396	268	Promoter (<=1kb)	8005819	8007251	1433	-	LOC_Os05g14260	855	sp|Q9LSP0|PER29_ARATH Peroxidase 29 OS=Arabidopsis thaliana GN=PER29 PE=2 SV=2//2.5163e-63
Chr5	8225636	8226244	609	Distal Intergenic	8216679	8222162	5484	-	LOC_Os05g14520	-3474	sp|P10978|POLX_TOBAC Retrovirus-related Pol polyprotein from transposon TNT 1-94 OS=Nicotiana tabacum PE=2 SV=1//3.07057e-09
Chr5	8516845	8517040	196	Promoter (<=1kb)	8517153	8522260	5108	+	LOC_Os05g15030	-113	sp|Q9UR07|TF211_SCHPO Transposon Tf2-11 polyprotein OS=Schizosaccharomyces pombe (strain 972 / ATCC 24843) GN=Tf2-11 PE=3 SV=1//5.66523e-30
Chr5	8613715	8614020	306	Promoter (<=1kb)	8613257	8614170	914	-	LOC_Os05g15170	150	sp|Q9LUZ9|ATL63_ARATH RING-H2 finger protein ATL63 OS=Arabidopsis thaliana GN=ATL63 PE=2 SV=1//1.13425e-12
Chr5	8680560	8680840	281	Promoter (<=1kb)	8680635	8683785	3151	+	LOC_Os05g15320	0	sp|Q9LTR2|TGD2_ARATH Protein TRIGALACTOSYLDIACYLGLYCEROL 2, chloroplastic OS=Arabidopsis thaliana GN=TGD2 PE=2 SV=1//5.11942e-12
Chr5	8822307	8822641	335	Promoter (<=1kb)	8822054	8831854	9801	+	LOC_Os05g15580	253	sp|P0CT39|TF26_SCHPO Transposon Tf2-6 polyprotein OS=Schizosaccharomyces pombe (strain 972 / ATCC 24843) GN=Tf2-6 PE=3 SV=1//1.07362e-06
Chr5	8822889	8823120	232	Promoter (<=1kb)	8822054	8831854	9801	+	LOC_Os05g15580	835	sp|P0CT39|TF26_SCHPO Transposon Tf2-6 polyprotein OS=Schizosaccharomyces pombe (strain 972 / ATCC 24843) GN=Tf2-6 PE=3 SV=1//1.07362e-06
Chr5	8921468	8921670	203	Promoter (<=1kb)	8921965	8926296	4332	+	LOC_Os05g15810	-295	sp|P10978|POLX_TOBAC Retrovirus-related Pol polyprotein from transposon TNT 1-94 OS=Nicotiana tabacum PE=2 SV=1//0
Chr5	9137399	9137594	196	Promoter (<=1kb)	9137917	9138465	549	+	LOC_Os05g16160	-323	sp|Q9LR73|3AT2_ARATH Coumaroyl-CoA:anthocyanidin 3-O-glucoside-6&apos;&apos;-O-coumaroyltransferase 2 OS=Arabidopsis thaliana GN=3AT2 PE=1 SV=1//4.48762e-07
Chr5	9137757	9138004	248	Promoter (<=1kb)	9137917	9138465	549	+	LOC_Os05g16160	0	sp|Q9LR73|3AT2_ARATH Coumaroyl-CoA:anthocyanidin 3-O-glucoside-6&apos;&apos;-O-coumaroyltransferase 2 OS=Arabidopsis thaliana GN=3AT2 PE=1 SV=1//4.48762e-07
Chr5	9429946	9430273	328	Promoter (2-3kb)	9432375	9436136	3762	+	LOC_Os05g16630	-2102	sp|Q8LCV1|PLP3B_ARATH Thioredoxin domain-containing protein PLP3B OS=Arabidopsis thaliana GN=PLP3B PE=2 SV=1//3.14641e-63
Chr5	9678398	9678678	281	Downstream (<1kb)	9667198	9674915	7718	-	LOC_Os05g16960	-3483	sp|P0CT39|TF26_SCHPO Transposon Tf2-6 polyprotein OS=Schizosaccharomyces pombe (strain 972 / ATCC 24843) GN=Tf2-6 PE=3 SV=1//4.76877e-149
Chr5	9782125	9782320	196	Promoter (2-3kb)	9784665	9797779	13115	+	LOC_Os05g17120	-2345	sp|P0CT39|TF26_SCHPO Transposon Tf2-6 polyprotein OS=Schizosaccharomyces pombe (strain 972 / ATCC 24843) GN=Tf2-6 PE=3 SV=1//5.37116e-111
Chr5	10224808	10225003	196	Promoter (<=1kb)	10225045	10227355	2311	+	LOC_Os05g17790	-42	sp|Q9UR07|TF211_SCHPO Transposon Tf2-11 polyprotein OS=Schizosaccharomyces pombe (strain 972 / ATCC 24843) GN=Tf2-11 PE=3 SV=1//1.45324e-20
Chr5	10307642	10307918	277	Promoter (<=1kb)	10308694	10310261	1568	+	LOC_Os05g17930	-776	sp|P04323|POL3_DROME Retrovirus-related Pol polyprotein from transposon 17.6 OS=Drosophila melanogaster GN=pol PE=3 SV=1//1.05677e-14
Chr5	10473285	10473742	458	Promoter (2-3kb)	10475770	10477167	1398	+	LOC_Os05g18210	-2028	sp|P0CT43|TF28_SCHPO Transposon Tf2-8 polyprotein OS=Schizosaccharomyces pombe (strain 972 / ATCC 24843) GN=Tf2-8 PE=3 SV=1//2.73989e-63
Chr5	10856748	10857000	253	Promoter (2-3kb)	10847748	10854702	6955	-	LOC_Os05g18730	-2046	sp|Q5W6B9|HAP2A_ORYSJ Protein HAPLESS 2-A OS=Oryza sativa subsp. japonica GN=HAP2A PE=2 SV=1//0
Chr5	10905517	10905742	226	Promoter (<=1kb)	10902343	10905382	3040	-	LOC_Os05g18780	-135	sp|Q69LA6|PDX11_ORYSJ Probable pyridoxal 5&apos;-phosphate synthase subunit PDX1.1 OS=Oryza sativa subsp. japonica GN=PDX11 PE=2 SV=1//2.93332e-42
Chr5	11234572	11234808	237	Promoter (2-3kb)	11236937	11239107	2171	+	LOC_Os05g19350	-2129	sp|P0CT40|TF29_SCHPO Transposon Tf2-9 polyprotein OS=Schizosaccharomyces pombe (strain 972 / ATCC 24843) GN=Tf2-9 PE=3 SV=1//2.45114e-94
Chr5	11256153	11256467	315	Promoter (<=1kb)	11253553	11256636	3084	-	LOC_Os05g19380	169	sp|O64624|PP163_ARATH Pentatricopeptide repeat-containing protein At2g18940, chloroplastic OS=Arabidopsis thaliana GN=At2g18940 PE=2 SV=1//0
Chr5	11327871	11328111	241	Promoter (<=1kb)	11320504	11327124	6621	-	LOC_Os05g19480	-747	sp|Q9CA86|PEX2_ARATH Peroxisome biogenesis protein 2 OS=Arabidopsis thaliana GN=PEX2 PE=1 SV=1//7.35387e-166
Chr5	11371923	11372118	196	Promoter (1-2kb)	11363300	11370485	7186	-	LOC_Os05g19540	-1438	sp|P10978|POLX_TOBAC Retrovirus-related Pol polyprotein from transposon TNT 1-94 OS=Nicotiana tabacum PE=2 SV=1//0
Chr5	11463260	11463557	298	Promoter (<=1kb)	11455480	11463418	7939	-	LOC_Os05g19650	0	sp|P0CT40|TF29_SCHPO Transposon Tf2-9 polyprotein OS=Schizosaccharomyces pombe (strain 972 / ATCC 24843) GN=Tf2-9 PE=3 SV=1//1.87789e-144
Chr5	11464001	11464196	196	Promoter (<=1kb)	11455480	11463418	7939	-	LOC_Os05g19650	-583	sp|P0CT40|TF29_SCHPO Transposon Tf2-9 polyprotein OS=Schizosaccharomyces pombe (strain 972 / ATCC 24843) GN=Tf2-9 PE=3 SV=1//1.87789e-144
Chr5	11781156	11781351	196	Promoter (<=1kb)	11772181	11781813	9633	-	LOC_Os05g20129	462	sp|P0CT39|TF26_SCHPO Transposon Tf2-6 polyprotein OS=Schizosaccharomyces pombe (strain 972 / ATCC 24843) GN=Tf2-6 PE=3 SV=1//1.11857e-143
Chr5	12138575	12138989	415	Promoter (<=1kb)	12136555	12137897	1343	-	LOC_Os05g20700	-678	sp|Q8I7P9|POL5_DROME Retrovirus-related Pol polyprotein from transposon opus OS=Drosophila melanogaster GN=pol PE=3 SV=1//5.45335e-12
Chr5	12404624	12405259	636	Promoter (<=1kb)	12404564	12410749	6186	+	LOC_Os05g21100	60	sp|Q7LHG5|YI31B_YEAST Transposon Ty3-I Gag-Pol polyprotein OS=Saccharomyces cerevisiae (strain ATCC 204508 / S288c) GN=TY3B-I PE=3 SV=2//8.88637e-10
Chr5	12438990	12439270	281	Promoter (<=1kb)	12438491	12439090	600	+	LOC_Os05g21140	499	sp|Q33DQ2|THCAI_CANSA Inactive tetrahydrocannabinolic acid synthase OS=Cannabis sativa PE=3 SV=1//5.13787e-08
Chr5	12748569	12748765	197	Promoter (<=1kb)	12749116	12754094	4979	+	LOC_Os05g22460	-351	sp|P0CT39|TF26_SCHPO Transposon Tf2-6 polyprotein OS=Schizosaccharomyces pombe (strain 972 / ATCC 24843) GN=Tf2-6 PE=3 SV=1//7.45811e-122
Chr5	12851541	12851736	196	Promoter (<=1kb)	12851354	12857587	6234	+	LOC_Os05g22650	187	sp|Q99315|YG31B_YEAST Transposon Ty3-G Gag-Pol polyprotein OS=Saccharomyces cerevisiae (strain ATCC 204508 / S288c) GN=TY3B-G PE=1 SV=3//1.45341e-44
Chr5	13298643	13298838	196	Promoter (<=1kb)	13293289	13298133	4845	-	LOC_Os05g23290	-510	sp|Q7LHG5|YI31B_YEAST Transposon Ty3-I Gag-Pol polyprotein OS=Saccharomyces cerevisiae (strain ATCC 204508 / S288c) GN=TY3B-I PE=3 SV=2//4.67036e-21
Chr5	13414014	13414484	471	Promoter (<=1kb)	13414162	13417106	2945	+	LOC_Os05g23460	0	sp|O59785|YCN8_SCHPO Uncharacterized solute carrier family 35 member C320.08 OS=Schizosaccharomyces pombe (strain 972 / ATCC 24843) GN=SPCC320.08 PE=1 SV=1//1.73651e-12
Chr5	13579424	13579723	300	Promoter (<=1kb)	13573857	13579655	5799	-	LOC_Os05g23670	0	sp|Q8GUI6|JMJ14_ARATH Probable lysine-specific demethylase JMJ14 OS=Arabidopsis thaliana GN=JMJ14 PE=1 SV=1//0
Chr5	13614882	13615077	196	Promoter (<=1kb)	13610549	13614441	3893	-	LOC_Os05g23720	-441	sp|P31691|ADT_ORYSJ ADP,ATP carrier protein, mitochondrial OS=Oryza sativa subsp. japonica GN=Os02g0718900 PE=2 SV=1//2.92935e-176
Chr5	13946354	13946628	275	Promoter (<=1kb)	13939693	13946672	6980	-	LOC_Os05g24160	44	sp|Q0DJA3|DRB3_ORYSJ Double-stranded RNA-binding protein 3 OS=Oryza sativa subsp. japonica GN=DRB3 PE=2 SV=1//0
Chr5	13957623	13957818	196	Promoter (<=1kb)	13950227	13957523	7297	-	LOC_Os05g24170	-100	sp|P10978|POLX_TOBAC Retrovirus-related Pol polyprotein from transposon TNT 1-94 OS=Nicotiana tabacum PE=2 SV=1//2.85563e-08
Chr5	14160249	14160444	196	Promoter (<=1kb)	14161386	14165587	4202	+	LOC_Os05g24550	-942	sp|Q5R6D1|CATB_PONAB Cathepsin B OS=Pongo abelii GN=CTSB PE=2 SV=1//2.17651e-67
Chr5	14235680	14235909	230	Promoter (<=1kb)	14233192	14236301	3110	-	LOC_Os05g24640	392	sp|P0C2F6|RNHX1_ARATH Putative ribonuclease H protein At1g65750 OS=Arabidopsis thaliana GN=At1g65750 PE=3 SV=1//1.95313e-07
Chr5	14245482	14245789	308	Promoter (<=1kb)	14245034	14246425	1392	+	LOC_Os05g24650	448	sp|Q9ZVI6|LOR8_ARATH Protein LURP-one-related 8 OS=Arabidopsis thaliana GN=At2g38640 PE=2 SV=1//2.6687e-30
Chr5	14308417	14308764	348	Promoter (<=1kb)	14294663	14308828	14166	-	LOC_Os05g24684	64	sp|Q9LUG9|MD33A_ARATH Mediator of RNA polymerase II transcription subunit 33A OS=Arabidopsis thaliana GN=MED33A PE=1 SV=1//0
Chr5	14361167	14361514	348	Promoter (<=1kb)	14360734	14361588	855	-	LOC_Os05g24780	74	sp|Q0DJ94|CML21_ORYSJ Probable calcium-binding protein CML21 OS=Oryza sativa subsp. japonica GN=CML21 PE=2 SV=2//1.15226e-48
Chr5	14725308	14725523	216	Promoter (<=1kb)	14725924	14735830	9907	+	LOC_Os05g25370	-401	sp|Q9SCZ4|FERON_ARATH Receptor-like protein kinase FERONIA OS=Arabidopsis thaliana GN=FER PE=1 SV=1//0
Chr5	14921318	14921551	234	Promoter (<=1kb)	14921392	14922141	750	+	LOC_Os05g25660	0	sp|Q9SCP2|PLY12_ARATH Probable pectate lyase 12 OS=Arabidopsis thaliana GN=At3g53190 PE=2 SV=2//2.12481e-54
Chr5	14997871	14998088	218	Promoter (<=1kb)	14997859	15000770	2912	+	LOC_Os05g25780	12	sp|Q1JPN0|STR7_ARATH Rhodanese-like domain-containing protein 7 OS=Arabidopsis thaliana GN=STR7 PE=2 SV=1//0
Chr5	15016297	15016538	242	Promoter (<=1kb)	15016470	15021005	4536	+	LOC_Os05g25800	0	sp|P08770|TRA1_MAIZE Putative AC transposase OS=Zea mays PE=2 SV=2//3.27983e-18
Chr5	15040924	15041187	264	Promoter (<=1kb)	15040797	15044759	3963	+	LOC_Os05g25840	127	sp|Q9MA15|Y1796_ARATH Uncharacterized aarF domain-containing protein kinase At1g79600, chloroplastic OS=Arabidopsis thaliana GN=At1g79600 PE=2 SV=1//0
Chr5	15084275	15084594	320	Promoter (<=1kb)	15084915	15086150	1236	+	LOC_Os05g25950	-321	sp|Q9LY16|CCU42_ARATH Cyclin-U4-2 OS=Arabidopsis thaliana GN=CYCU4-2 PE=1 SV=1//4.81836e-09
Chr5	15211619	15211885	267	Promoter (<=1kb)	15207394	15212430	5037	-	LOC_Os05g26140	545	sp|Q9XF57|PEX7_ARATH Peroxisome biogenesis protein 7 OS=Arabidopsis thaliana GN=PEX7 PE=1 SV=2//9.9497e-08
Chr5	15410194	15410389	196	Promoter (<=1kb)	15409216	15409869	654	+	LOC_Os05g26510	978	sp|P0CT40|TF29_SCHPO Transposon Tf2-9 polyprotein OS=Schizosaccharomyces pombe (strain 972 / ATCC 24843) GN=Tf2-9 PE=3 SV=1//2.77785e-06
Chr5	15436464	15436860	397	Promoter (<=1kb)	15436304	15439896	3593	+	LOC_Os05g26570	160	sp|Q7LHG5|YI31B_YEAST Transposon Ty3-I Gag-Pol polyprotein OS=Saccharomyces cerevisiae (strain ATCC 204508 / S288c) GN=TY3B-I PE=3 SV=2//6.48494e-41
Chr5	15653352	15653609	258	Distal Intergenic	15643309	15644664	1356	-	LOC_Os05g26940	-8688	sp|Q5KQF5|CIPKM_ORYSJ CBL-interacting protein kinase 22 OS=Oryza sativa subsp. japonica GN=CIPK22 PE=2 SV=1//0
Chr5	15779276	15779866	591	Promoter (<=1kb)	15779391	15779933	543	-	LOC_Os05g27120	67	sp|Q9LMK2|LSH6_ARATH Protein LIGHT-DEPENDENT SHORT HYPOCOTYLS 6 OS=Arabidopsis thaliana GN=LSH6 PE=1 SV=1//4.34972e-27
Chr5	16186512	16186757	246	Promoter (<=1kb)	16184117	16186813	2697	-	LOC_Os05g27790	56	sp|Q5W6M3|CSPLG_ORYSJ CASP-like protein 4B4 OS=Oryza sativa subsp. japonica GN=Os05g0344400 PE=3 SV=1//3.37119e-89
Chr5	16216870	16217119	250	Promoter (<=1kb)	16216524	16220140	3617	+	LOC_Os05g27820	346	sp|Q9SCU1|PATL6_ARATH Patellin-6 OS=Arabidopsis thaliana GN=PATL6 PE=2 SV=1//0
Chr5	16319074	16319269	196	Promoter (<=1kb)	16312800	16319405	6606	-	LOC_Os05g27960	136	sp|Q9SRL4|ENAS2_ARATH Cytosolic endo-beta-N-acetylglucosaminidase 2 OS=Arabidopsis thaliana GN=ENGASE2 PE=1 SV=1//0
Chr5	16928458	16928653	196	Promoter (<=1kb)	16928160	16932199	4040	+	LOC_Os05g28870	298	sp|O22261|NDT1_ARATH Nicotinamide adenine dinucleotide transporter 1, chloroplastic OS=Arabidopsis thaliana GN=NDT1 PE=1 SV=2//1.17996e-126
Chr5	16972953	16973148	196	Promoter (<=1kb)	16972939	16975972	3034	+	LOC_Os05g28950	14	sp|Q8GW19|FACE2_ARATH CAAX prenyl protease 2 OS=Arabidopsis thaliana GN=FACE2 PE=2 SV=2//2.50222e-28
Chr5	16981846	16982041	196	Promoter (<=1kb)	16977288	16982192	4905	-	LOC_Os05g28960	151	sp|Q8L7R3|LPCT1_ARATH Lysophospholipid acyltransferase LPEAT1 OS=Arabidopsis thaliana GN=LPEAT1 PE=1 SV=1//8.18435e-127
Chr5	17149778	17149973	196	Promoter (<=1kb)	17149339	17152306	2968	+	LOC_Os05g29676	439	sp|O22255|ATL64_ARATH RING-H2 finger protein ATL64 OS=Arabidopsis thaliana GN=ATL64 PE=2 SV=1//8.48041e-16
Chr5	17331566	17331779	214	Promoter (<=1kb)	17331745	17332206	462	-	LOC_Os05g29960	427	sp|Q84TH5|AB25G_ARATH ABC transporter G family member 25 OS=Arabidopsis thaliana GN=ABCG25 PE=2 SV=1//1.49207e-07
Chr5	17497670	17497865	196	Promoter (<=1kb)	17497543	17499131	1589	+	LOC_Os05g30190	127	sp|Q8LEA8|EID1_ARATH Phytochrome A-associated F-box protein OS=Arabidopsis thaliana GN=EID1 PE=1 SV=2//8.2243e-58
Chr5	17632915	17633110	196	Promoter (<=1kb)	17630980	17633380	2401	-	LOC_Os05g30420	270	sp|Q75AB6|NOP16_ASHGO Nucleolar protein 16 OS=Ashbya gossypii (strain ATCC 10895 / CBS 109.51 / FGSC 9923 / NRRL Y-1056) GN=NOP16 PE=3 SV=1//3.76502e-06
Chr5	17827115	17827390	276	Promoter (<=1kb)	17821376	17827429	6054	-	LOC_Os05g30760	39	sp|Q0JG99|PIR7B_ORYSJ Esterase PIR7B OS=Oryza sativa subsp. japonica GN=PIR7B PE=2 SV=2//1.65491e-69
Chr5	17934630	17934831	202	Promoter (<=1kb)	17934628	17941865	7238	+	LOC_Os05g30890	2	sp|Q9LUC5|C7A15_ARATH Cytochrome P450 72A15 OS=Arabidopsis thaliana GN=CYP72A15 PE=2 SV=1//0
Chr5	17945877	17946224	348	Promoter (<=1kb)	17941947	17945667	3721	-	LOC_Os05g30900	-210	sp|P19515|LIP_RHIMI Lipase OS=Rhizomucor miehei PE=1 SV=2//1.32298e-25
Chr5	18064154	18064349	196	Promoter (<=1kb)	18063119	18064700	1582	-	LOC_Os05g31080	351	sp|Q9SZR9|AB9G_ARATH ABC transporter G family member 9 OS=Arabidopsis thaliana GN=ABCG9 PE=3 SV=2//3.44094e-09
Chr5	18084809	18085086	278	Distal Intergenic	18075301	18081280	5980	-	LOC_Os05g31110	-3529	sp|Q2KNB5|HXK10_ORYSJ Hexokinase-10 OS=Oryza sativa subsp. japonica GN=HXK10 PE=2 SV=1//0
Chr5	18695064	18695402	339	Promoter (<=1kb)	18693817	18695153	1337	-	LOC_Os05g32070	0	sp|Q94CK9|LRP1_ARATH Protein LATERAL ROOT PRIMORDIUM 1 OS=Arabidopsis thaliana GN=LRP1 PE=1 SV=1//1.29913e-49
Chr5	18773052	18773558	507	Promoter (<=1kb)	18774065	18774910	846	+	LOC_Os05g32200	-507	sp|Q9FK27|FB342_ARATH F-box protein At5g50450 OS=Arabidopsis thaliana GN=At5g50450 PE=2 SV=1//1.12195e-10
Chr5	18828607	18828802	196	Promoter (<=1kb)	18823135	18828798	5664	-	LOC_Os05g32290	0	sp|P10978|POLX_TOBAC Retrovirus-related Pol polyprotein from transposon TNT 1-94 OS=Nicotiana tabacum PE=2 SV=1//4.36447e-139
Chr5	19083908	19084103	196	Promoter (<=1kb)	19083908	19089902	5995	+	LOC_Os05g32600	0	sp|P29620|CDKD1_ORYSJ Cyclin-dependent kinase D-1 OS=Oryza sativa subsp. japonica GN=CDKD-1 PE=1 SV=1//0
Chr5	19167777	19168014	238	Promoter (<=1kb)	19166574	19168235	1662	-	LOC_Os05g32730	221	sp|Q3EDF8|PPR28_ARATH Pentatricopeptide repeat-containing protein At1g09900 OS=Arabidopsis thaliana GN=At1g09900 PE=2 SV=1//3.16763e-07
Chr5	19508537	19508785	249	Promoter (<=1kb)	19507483	19509091	1609	-	LOC_Os05g33280	306	sp|Q6ATY4|U603_ORYSJ UPF0603 protein Os05g0401100, chloroplastic OS=Oryza sativa subsp. japonica GN=Os05g0401100 PE=3 SV=1//2.09443e-152
Chr5	19758568	19758763	196	Promoter (<=1kb)	19756222	19758913	2692	-	LOC_Os05g33600	150	sp|H2DH21|C7A29_PANGI Cytochrome P450 CYP72A219 OS=Panax ginseng PE=2 SV=1//8.31342e-116
Chr5	19776807	19777023	217	Promoter (<=1kb)	19776474	19780602	4129	+	LOC_Os05g33620	333	sp|Q93W28|Y4554_ARATH Uncharacterized protein At4g15545 OS=Arabidopsis thaliana GN=At4g15545 PE=1 SV=1//1.12598e-75
Chr5	19834312	19834563	252	Promoter (<=1kb)	19834008	19838350	4343	+	LOC_Os05g33700	304	sp|Q9C6E4|EXOL1_ARATH Protein EXORDIUM-like 1 OS=Arabidopsis thaliana GN=EXL1 PE=2 SV=1//1.96116e-06
Chr5	20061262	20061523	262	Promoter (<=1kb)	20061030	20066991	5962	+	LOC_Os05g33980	232	sp|Q7LHG5|YI31B_YEAST Transposon Ty3-I Gag-Pol polyprotein OS=Saccharomyces cerevisiae (strain ATCC 204508 / S288c) GN=TY3B-I PE=3 SV=2//8.68694e-10
Chr5	20155594	20155789	196	Promoter (<=1kb)	20153938	20156656	2719	-	LOC_Os05g34110	867	sp|Q9SNB4|PCL1_ARATH Transcription factor LUX OS=Arabidopsis thaliana GN=LUX PE=1 SV=1//5.72042e-32
Chr5	20210280	20210513	234	Promoter (<=1kb)	20210321	20213587	3267	+	LOC_Os05g34180	0	sp|O48964|IDI1_CAMAC Isopentenyl-diphosphate Delta-isomerase I OS=Camptotheca acuminata GN=IPI1 PE=2 SV=1//2.06681e-145
Chr5	20257327	20257694	368	Promoter (<=1kb)	20258661	20262179	3519	+	LOC_Os05g34220	-967	sp|Q9LRR4|R13L1_ARATH Putative disease resistance RPP13-like protein 1 OS=Arabidopsis thaliana GN=RPPL1 PE=3 SV=1//3.54681e-102
Chr5	20266124	20266326	203	Promoter (<=1kb)	20263661	20266481	2821	-	LOC_Os05g34230	155	sp|Q7XA40|RGA3_SOLBU Putative disease resistance protein RGA3 OS=Solanum bulbocastanum GN=RGA3 PE=2 SV=2//1.32212e-70
Chr5	20384051	20384381	331	Promoter (<=1kb)	20384039	20390785	6747	+	LOC_Os05g34390	12	sp|O64477|Y2913_ARATH G-type lectin S-receptor-like serine/threonine-protein kinase At2g19130 OS=Arabidopsis thaliana GN=At2g19130 PE=2 SV=1//6.17856e-08
Chr5	20384529	20384774	246	Promoter (<=1kb)	20384039	20390785	6747	+	LOC_Os05g34390	490	sp|O64477|Y2913_ARATH G-type lectin S-receptor-like serine/threonine-protein kinase At2g19130 OS=Arabidopsis thaliana GN=At2g19130 PE=2 SV=1//6.17856e-08
Chr5	20501106	20501691	586	Promoter (<=1kb)	20498924	20501692	2769	-	LOC_Os05g34570	1	sp|O23266|PP308_ARATH Pentatricopeptide repeat-containing protein At4g14050, mitochondrial OS=Arabidopsis thaliana GN=PCMP-H13 PE=2 SV=3//1.48874e-10
Chr5	20552886	20553121	236	Promoter (<=1kb)	20548363	20553184	4822	-	LOC_Os05g34650	63	sp|Q93YU2|RUS6_ARATH Protein root UVB sensitive 6 OS=Arabidopsis thaliana GN=RUS6 PE=2 SV=1//0
Chr5	20642980	20643321	342	Promoter (1-2kb)	20644708	20648700	3993	+	LOC_Os05g34790	-1387	sp|Q9FT92|Y5843_ARATH Uncharacterized protein At5g08430 OS=Arabidopsis thaliana GN=At5g08430 PE=1 SV=2//6.18117e-13
Chr5	20660823	20661032	210	Promoter (1-2kb)	20663027	20668607	5581	+	LOC_Os05g34820	-1995	sp|Q3ZBR5|TTC1_BOVIN Tetratricopeptide repeat protein 1 OS=Bos taurus GN=TTC1 PE=2 SV=1//1.38298e-11
Chr5	20679496	20679727	232	Promoter (1-2kb)	20678010	20680343	2334	+	LOC_Os05g34830	1486	sp|Q7F2L3|NAC48_ORYSJ NAC domain-containing protein 48 OS=Oryza sativa subsp. japonica GN=NAC48 PE=2 SV=1//2.72191e-119
[truncated: 967 more rows]

## Sheet: Oligonucleotides for qPCR  EMSA
Table S3. Primers used in this study, related to STAR Methods.
[truncated: 87 more rows]

[truncated: 1 more sheets: Primers for all the constructs]
